# Supplementary material for: Surpassing 10 000 identified and quantified proteins in a single run by optimizing current LC-MS instrumentation and data analysis strategy
Source: Royal Society of Chemistry journal article supplement (doi:10.1039/c9mo00082h), 2019-08-29
Supplement: c9mo00082h3.xlsx [file c9mo00082h3.xlsx]

## Sheet: 553-6h-SampleSet-6files_HybridL
Supplementary Table 6: Exported Candidate List after Statistical Testing in Spectronaut.
Comparison (group1/group2)	Group	ProteinGroups	FirstEntry	AVG Log2 Ratio	Absolute AVG Log2 Ratio	Qvalue	# of Ratios	UniProtIds	Genes	ProteinDescriptions	ProteinNames	# Unique Total Peptides	% Change	Ratio	Condition Numerator
cancer / NAT	Q09666	Q09666	Q09666	-1.65053	1.65053	0	2826	Q09666	AHNAK	Neuroblast differentiation-associated protein AHNAK	AHNK_HUMAN	451	-68.1477	0.318523	cancer
cancer / NAT	P35749-2	P35749-2	P35749	-1.58119	1.58119	1.88885e-285	1449	P35749-2	MYH11	Isoform 2 of Myosin-11	MYH11_HUMAN	222	-66.5794	0.334206	cancer
cancer / NAT	Q15149	Q15149	Q15149	-1.16038	1.16038	1.97092e-207	2034	Q15149	PLEC	Plectin	PLEC_HUMAN	434	-55.2605	0.447395	cancer
cancer / NAT	Q13813-2	Q13813-2	Q13813	-1.50619	1.50619	3.4129e-205	1581	Q13813-2	SPTAN1	Isoform 2 of Spectrin alpha chain, non-erythrocytic 1	SPTN1_HUMAN	270	-64.796	0.35204	cancer
cancer / NAT	P35555	P35555	P35555	-3.57689	3.57689	2.41931e-201	888	P35555	FBN1	Fibrillin-1	FBN1_HUMAN	161	-91.6199	0.0838007	cancer
cancer / NAT	Q01082-2	Q01082-2	Q01082	-1.5774	1.5774	1.43624e-188	1404	Q01082-2	SPTBN1	Isoform Short of Spectrin beta chain, non-erythrocytic 1	SPTB2_HUMAN	224	-66.4914	0.335086	cancer
cancer / NAT	P01024	P01024	P01024	-1.94298	1.94298	4.62562e-173	948	P01024	C3	Complement C3	CO3_HUMAN	161	-73.9921	0.260079	cancer
cancer / NAT	P02768	P02768	P02768	-2.12916	2.12916	2.06379e-166	903	P02768	ALB	Serum albumin	ALBU_HUMAN	129	-77.1409	0.228591	cancer
cancer / NAT	P08670	P08670	P08670	-2.29077	2.29077	1.38954e-163	663	P08670	VIM	Vimentin	VIME_HUMAN	90	-79.5634	0.204366	cancer
cancer / NAT	P18206;P18206-2	P18206;P18206-2	P18206	-1.57505	1.57505	2.19239e-158	717	P18206;P18206-2	VCL	Vinculin;Isoform 1 of Vinculin	VINC_HUMAN	110	-66.437	0.33563	cancer
cancer / NAT	Q9ULL0	Q9ULL0	Q9ULL0	-3.91771	3.91771	3.13389e-157	687	Q9ULL0	KIAA1210	Acrosomal protein KIAA1210	K1210_HUMAN	132	-93.3832	0.0661684	cancer
cancer / NAT	P46821	P46821	P46821	-2.50416	2.50416	3.5632e-154	738	P46821	MAP1B	Microtubule-associated protein 1B	MAP1B_HUMAN	158	-82.3732	0.176268	cancer
cancer / NAT	Q9HBL0	Q9HBL0	Q9HBL0	-2.22856	2.22856	3.94003e-154	576	Q9HBL0	TNS1	Tensin-1	TENS1_HUMAN	113	-78.6628	0.213372	cancer
cancer / NAT	Q8WXH0	Q8WXH0	Q8WXH0	-0.946486	0.946486	4.5905e-154	1611	Q8WXH0	SYNE2	Nesprin-2	SYNE2_HUMAN	494	-48.1105	0.518895	cancer
cancer / NAT	Q9NU22	Q9NU22	Q9NU22	1.73797	1.73797	2.61593e-132	1251	Q9NU22	MDN1	Midasin	MDN1_HUMAN	315	233.565	3.33565	cancer
cancer / NAT	P01009	P01009	P01009	-1.94625	1.94625	1.06296e-129	330	P01009	SERPINA1	Alpha-1-antitrypsin	A1AT_HUMAN	44	-74.051	0.25949	cancer
cancer / NAT	P01023	P01023	P01023	-1.40259	1.40259	9.46442e-126	504	P01023	A2M	Alpha-2-macroglobulin	A2MG_HUMAN	87	-62.1752	0.378248	cancer
cancer / NAT	Q07954	Q07954	Q07954	-1.78842	1.78842	5.82199e-119	663	Q07954	LRP1	Prolow-density lipoprotein receptor-related protein 1	LRP1_HUMAN	180	-71.0512	0.289488	cancer
cancer / NAT	P12111	P12111	P12111	-1.64951	1.64951	2.6953e-115	954	P12111	COL6A3	Collagen alpha-3(VI) chain	CO6A3_HUMAN	202	-68.1252	0.318748	cancer
cancer / NAT	P00747	P00747	P00747	-1.64642	1.64642	1.91972e-111	420	P00747	PLG	Plasminogen	PLMN_HUMAN	74	-68.0569	0.319431	cancer
cancer / NAT	P04114	P04114	P04114	-1.51562	1.51562	4.42048e-110	837	P04114	APOB	Apolipoprotein B-100	APOB_HUMAN	255	-65.0254	0.349746	cancer
cancer / NAT	P08603	P08603	P08603	-1.8732	1.8732	9.46982e-107	453	P08603	CFH	Complement factor H	CFAH_HUMAN	82	-72.7032	0.272968	cancer
cancer / NAT	P02787	P02787	P02787	-1.49056	1.49056	3.45261e-105	666	P02787	TF	Serotransferrin	TRFE_HUMAN	104	-64.4126	0.355874	cancer
cancer / NAT	P0C0L4	P0C0L4	P0C0L4	-1.70905	1.70905	1.65434e-104	558	P0C0L4	C4A	Complement C4-A	CO4A_HUMAN	108	-69.4138	0.305862	cancer
cancer / NAT	P02545	P02545	P02545	-2.30651	2.30651	3.34598e-94	534	P02545	LMNA	Prelamin-A/C	LMNA_HUMAN	85	-79.7851	0.202149	cancer
cancer / NAT	P12956	P12956	P12956	1.38678	1.38678	1.03239e-92	519	P12956	XRCC6	X-ray repair cross-complementing protein 6	XRCC6_HUMAN	77	161.494	2.61494	cancer
cancer / NAT	P78527	P78527	P78527	0.915219	0.915219	4.78528e-91	1614	P78527	PRKDC	DNA-dependent protein kinase catalytic subunit	PRKDC_HUMAN	295	88.5855	1.88586	cancer
cancer / NAT	P00450	P00450	P00450	-1.70597	1.70597	8.02279e-87	495	P00450	CP	Ceruloplasmin	CERU_HUMAN	75	-69.3484	0.306516	cancer
cancer / NAT	P09874	P09874	P09874	1.71438	1.71438	1.70027e-86	675	P09874	PARP1	Poly [ADP-ribose] polymerase 1	PARP1_HUMAN	101	228.155	3.28155	cancer
cancer / NAT	P11586	P11586	P11586	1.84285	1.84285	6.26673e-86	408	P11586	MTHFD1	C-1-tetrahydrofolate synthase, cytoplasmic	C1TC_HUMAN	74	258.719	3.58719	cancer
cancer / NAT	O75643	O75643	O75643	1.04817	1.04817	6.90391e-86	930	O75643	SNRNP200	U5 small nuclear ribonucleoprotein 200 kDa helicase	U520_HUMAN	178	106.791	2.06791	cancer
cancer / NAT	Q06278	Q06278	Q06278	-3.51207	3.51207	2.4089e-85	384	Q06278	AOX1	Aldehyde oxidase	AOXA_HUMAN	83	-91.2348	0.0876519	cancer
cancer / NAT	Q02252	Q02252	Q02252	-2.13724	2.13724	4.69654e-85	210	Q02252	ALDH6A1	Methylmalonate-semialdehyde dehydrogenase [acylating], mitochondrial	MMSA_HUMAN	36	-77.2686	0.227314	cancer
cancer / NAT	P02647	P02647	P02647	-1.38943	1.38943	8.46287e-83	312	P02647	APOA1	Apolipoprotein A-I	APOA1_HUMAN	52	-61.8285	0.381715	cancer
cancer / NAT	P22314;P22314-2	P22314;P22314-2	P22314	-1.13712	1.13712	2.12029e-82	408	P22314;P22314-2	UBA1	Ubiquitin-like modifier-activating enzyme 1;Isoform 2 of Ubiquitin-like modifier-activating enzyme 1	UBA1_HUMAN	63	-54.5333	0.454667	cancer
cancer / NAT	P13010	P13010	P13010	1.44189	1.44189	1.41014e-81	465	P13010	XRCC5	X-ray repair cross-complementing protein 5	XRCC5_HUMAN	70	171.677	2.71677	cancer
cancer / NAT	Q14697-2	Q14697-2	Q14697	-0.906768	0.906768	1.01831e-80	462	Q14697-2	GANAB	Isoform 2 of Neutral alpha-glucosidase AB	GANAB_HUMAN	69	-46.6621	0.533379	cancer
cancer / NAT	Q63HN8;Q63HN8-4	Q63HN8;Q63HN8-4	Q63HN8	1.24319	1.24319	1.25288e-80	837	Q63HN8;Q63HN8-4	RNF213	E3 ubiquitin-protein ligase RNF213;Isoform 2 of E3 ubiquitin-protein ligase RNF213	RN213_HUMAN	258	136.722	2.36722	cancer
cancer / NAT	Q14195-2	Q14195-2	Q14195	-1.19394	1.19394	1.52381e-79	330	Q14195-2	DPYSL3	Isoform LCRMP-4 of Dihydropyrimidinase-related protein 3	DPYL3_HUMAN	50	-56.2893	0.437107	cancer
cancer / NAT	P21399	P21399	P21399	-1.76288	1.76288	6.77751e-79	321	P21399	ACO1	Cytoplasmic aconitate hydratase	ACOC_HUMAN	60	-70.5341	0.294659	cancer
cancer / NAT	Q6P2Q9	Q6P2Q9	Q6P2Q9	0.968426	0.968426	1.02663e-78	807	Q6P2Q9	PRPF8	Pre-mRNA-processing-splicing factor 8	PRP8_HUMAN	155	95.6704	1.9567	cancer
cancer / NAT	P13796	P13796	P13796	1.89852	1.89852	1.64552e-78	324	P13796	LCP1	Plastin-2	PLSL_HUMAN	48	272.829	3.72829	cancer
cancer / NAT	P22570;P22570-7	P22570;P22570-7	P22570	-3.39073	3.39073	3.28207e-76	246	P22570;P22570-7	FDXR	NADPH:adrenodoxin oxidoreductase, mitochondrial;Isoform 7 of NADPH:adrenodoxin oxidoreductase, mitochondrial	ADRO_HUMAN	44	-90.4657	0.0953427	cancer
cancer / NAT	P24821-4	P24821-4	P24821	0.611329	0.611329	7.38567e-76	411	P24821-4	TNC	Isoform 4 of Tenascin	TENA_HUMAN	104	52.7666	1.52767	cancer
cancer / NAT	P01031	P01031	P01031	-1.88839	1.88839	1.69453e-75	342	P01031	C5	Complement C5	CO5_HUMAN	80	-72.9891	0.270109	cancer
cancer / NAT	Q9Y490	Q9Y490	Q9Y490	-0.700496	0.700496	1.92786e-75	1203	Q9Y490	TLN1	Talin-1	TLN1_HUMAN	197	-38.4639	0.615361	cancer
cancer / NAT	P07099	P07099	P07099	-3.53503	3.53503	1.97441e-74	285	P07099	EPHX1	Epoxide hydrolase 1	HYEP_HUMAN	45	-91.3732	0.086268	cancer
cancer / NAT	P00352	P00352	P00352	-3.07942	3.07942	2.09217e-74	270	P00352	ALDH1A1	Retinal dehydrogenase 1	AL1A1_HUMAN	40	-88.1695	0.118305	cancer
cancer / NAT	O00468-6	O00468-6	O00468	-2.42326	2.42326	2.62271e-74	267	O00468-6	AGRN	Isoform 6 of Agrin	AGRIN_HUMAN	75	-81.3565	0.186435	cancer
cancer / NAT	P11413;P11413-2	P11413;P11413-2	P11413	-2.43953	2.43953	2.02568e-73	354	P11413;P11413-2	G6PD	Glucose-6-phosphate 1-dehydrogenase;Isoform Long of Glucose-6-phosphate 1-dehydrogenase	G6PD_HUMAN	54	-81.5656	0.184344	cancer
cancer / NAT	P22105;P22105-3	P22105;P22105-3	P22105	-1.49643	1.49643	1.33529e-71	600	P22105;P22105-3	TNXB	Tenascin-X;Isoform 4 of Tenascin-X	TENX_HUMAN	180	-64.5572	0.354428	cancer
cancer / NAT	P52701	P52701	P52701	1.65534	1.65534	2.13304e-71	474	P52701	MSH6	DNA mismatch repair protein Msh6	MSH6_HUMAN	100	214.998	3.14998	cancer
cancer / NAT	P15924	P15924	P15924	1.4649	1.4649	4.69055e-71	639	P15924	DSP	Desmoplakin	DESP_HUMAN	206	176.045	2.76045	cancer
cancer / NAT	Q08211	Q08211	Q08211	1.06093	1.06093	1.05861e-69	498	Q08211	DHX9	ATP-dependent RNA helicase A	DHX9_HUMAN	84	108.628	2.08628	cancer
cancer / NAT	P05093	P05093	P05093	-4.3604	4.3604	1.3832e-69	288	P05093	CYP17A1	Steroid 17-alpha-hydroxylase/17,20 lyase	CP17A_HUMAN	40	-95.1316	0.0486843	cancer
cancer / NAT	Q14204	Q14204	Q14204	-0.597919	0.597919	3.89455e-68	1905	Q14204	DYNC1H1	Cytoplasmic dynein 1 heavy chain 1	DYHC1_HUMAN	374	-33.9294	0.660706	cancer
cancer / NAT	Q92616	Q92616	Q92616	0.903141	0.903141	1.28314e-67	957	Q92616	GCN1	eIF-2-alpha kinase activator GCN1	GCN1_HUMAN	196	87.0133	1.87013	cancer
cancer / NAT	P98160	P98160	P98160	-0.450862	0.450862	2.25196e-67	1068	P98160	HSPG2	Basement membrane-specific heparan sulfate proteoglycan core protein	PGBM_HUMAN	223	-26.8394	0.731606	cancer
cancer / NAT	P46939	P46939	P46939	-1.20306	1.20306	5.4653e-67	714	P46939	UTRN	Utrophin	UTRO_HUMAN	199	-56.5647	0.434353	cancer
cancer / NAT	Q92626	Q92626	Q92626	1.83831	1.83831	3.06595e-66	303	Q92626	PXDN	Peroxidasin homolog	PXDN_HUMAN	75	257.591	3.57591	cancer
cancer / NAT	P02790	P02790	P02790	-1.96443	1.96443	6.26887e-66	231	P02790	HPX	Hemopexin	HEMO_HUMAN	34	-74.376	0.25624	cancer
cancer / NAT	P05023;P05023-4	P05023;P05023-4	P05023	-1.15589	1.15589	1.57322e-65	348	P05023;P05023-4	ATP1A1	Sodium/potassium-transporting ATPase subunit alpha-1;Isoform 4 of Sodium/potassium-transporting ATPase subunit alpha-1	AT1A1_HUMAN	64	-55.1212	0.448788	cancer
cancer / NAT	Q02790	Q02790	Q02790	2.04946	2.04946	1.98056e-65	411	Q02790	FKBP4	Peptidyl-prolyl cis-trans isomerase FKBP4	FKBP4_HUMAN	61	313.951	4.13951	cancer
cancer / NAT	P78347-2	P78347-2	P78347	1.68668	1.68668	3.07713e-65	420	P78347-2	GTF2I	Isoform 2 of General transcription factor II-I	GTF2I_HUMAN	80	221.915	3.21915	cancer
cancer / NAT	P02671	P02671	P02671	-2.29295	2.29295	5.18526e-63	375	P02671	FGA	Fibrinogen alpha chain	FIBA_HUMAN	62	-79.5942	0.204058	cancer
cancer / NAT	P21266	P21266	P21266	-4.18237	4.18237	3.85277e-62	219	P21266	GSTM3	Glutathione S-transferase Mu 3	GSTM3_HUMAN	31	-94.4922	0.0550782	cancer
cancer / NAT	P16152	P16152	P16152	-1.61558	1.61558	5.54239e-62	132	P16152	CBR1	Carbonyl reductase [NADPH] 1	CBR1_HUMAN	22	-67.3667	0.326333	cancer
cancer / NAT	P00738	P00738	P00738	-1.49303	1.49303	1.34176e-61	246	P00738	HP	Haptoglobin	HPT_HUMAN	42	-64.4734	0.355266	cancer
cancer / NAT	A6NHR9	A6NHR9	A6NHR9	1.3279	1.3279	1.84234e-60	582	A6NHR9	SMCHD1	Structural maintenance of chromosomes flexible hinge domain-containing protein 1	SMHD1_HUMAN	144	151.037	2.51037	cancer
cancer / NAT	P49189	P49189	P49189	-1.57082	1.57082	9.82569e-60	258	P49189	ALDH9A1	4-trimethylaminobutyraldehyde dehydrogenase	AL9A1_HUMAN	40	-66.3382	0.336618	cancer
cancer / NAT	P01042-2	P01042-2	P01042	-2.05903	2.05903	1.33675e-59	231	P01042-2	KNG1	Isoform LMW of Kininogen-1	KNG1_HUMAN	37	-76.0023	0.239977	cancer
cancer / NAT	P00751	P00751	P00751	-1.95693	1.95693	1.5641e-58	345	P00751	CFB	Complement factor B	CFAB_HUMAN	54	-74.2424	0.257576	cancer
cancer / NAT	P00387;P00387-2;P00387-3	P00387;P00387-2;P00387-3	P00387	-2.4431	2.4431	2.90036e-58	225	P00387;P00387-2;P00387-3	CYB5R3	NADH-cytochrome b5 reductase 3;Isoform 2 of NADH-cytochrome b5 reductase 3;Isoform 3 of NADH-cytochrome b5 reductase 3	NB5R3_HUMAN	29	-81.6112	0.183888	cancer
cancer / NAT	Q8NF91-4	Q8NF91-4	Q8NF91	-1.55063	1.55063	1.6507e-57	627	Q8NF91-4	SYNE1	Isoform 4 of Nesprin-1	SYNE1_HUMAN	258	-65.8639	0.341361	cancer
cancer / NAT	O95340	O95340	O95340	-3.44161	3.44161	9.03251e-57	234	O95340	PAPSS2	Bifunctional 3'-phosphoadenosine 5'-phosphosulfate synthase 2	PAPS2_HUMAN	44	-90.7961	0.0920393	cancer
cancer / NAT	P00488	P00488	P00488	-2.70386	2.70386	1.11679e-56	288	P00488	F13A1	Coagulation factor XIII A chain	F13A_HUMAN	54	-84.6518	0.153482	cancer
cancer / NAT	Q9UM54-2	Q9UM54-2	Q9UM54	-1.67466	1.67466	2.41441e-56	411	Q9UM54-2	MYO6	Isoform 2 of Unconventional myosin-VI	MYO6_HUMAN	101	-68.6759	0.313241	cancer
cancer / NAT	Q6NZI2	Q6NZI2	Q6NZI2	-2.21295	2.21295	2.56908e-56	195	Q6NZI2	CAVIN1	Caveolae-associated protein 1	CAVN1_HUMAN	31	-78.4307	0.215693	cancer
cancer / NAT	P51178-2	P51178-2	P51178	-3.74757	3.74757	5.87525e-56	222	P51178-2	PLCD1	Isoform 2 of 1-phosphatidylinositol 4,5-bisphosphate phosphodiesterase delta-1	PLCD1_HUMAN	44	-92.5549	0.074451	cancer
cancer / NAT	O00159-3	O00159-3	O00159	-1.6201	1.6201	1.86279e-55	345	O00159-3	MYO1C	Isoform 3 of Unconventional myosin-Ic	MYO1C_HUMAN	78	-67.4688	0.325312	cancer
cancer / NAT	P08263	P08263	P08263	-4.13092	4.13092	2.74964e-55	243	P08263	GSTA1	Glutathione S-transferase A1	GSTA1_HUMAN	28	-94.2922	0.0570781	cancer
cancer / NAT	P24043	P24043	P24043	-1.39836	1.39836	4.07711e-55	585	P24043	LAMA2	Laminin subunit alpha-2	LAMA2_HUMAN	163	-62.0641	0.379359	cancer
cancer / NAT	O75369;O75369-2;O75369-9	O75369;O75369-2;O75369-9	O75369	0.0425676	0.0425676	5.97038e-55	1245	O75369;O75369-2;O75369-9	FLNB	Filamin-B;Isoform 2 of Filamin-B;Isoform 9 of Filamin-B	FLNB_HUMAN	213	2.99452	1.02995	cancer
cancer / NAT	P02774;P02774-3	P02774;P02774-3	P02774	-1.86716	1.86716	6.92441e-55	276	P02774;P02774-3	GC	Vitamin D-binding protein;Isoform 3 of Vitamin D-binding protein	VTDB_HUMAN	43	-72.5888	0.274112	cancer
cancer / NAT	Q9Y3Z3	Q9Y3Z3	Q9Y3Z3	1.11295	1.11295	7.66286e-55	399	Q9Y3Z3	SAMHD1	Deoxynucleoside triphosphate triphosphohydrolase SAMHD1	SAMH1_HUMAN	62	116.288	2.16288	cancer
cancer / NAT	P23381	P23381	P23381	1.59666	1.59666	3.51982e-54	288	P23381	WARS	Tryptophan--tRNA ligase, cytoplasmic	SYWC_HUMAN	44	202.442	3.02442	cancer
cancer / NAT	Q9NZN4-2	Q9NZN4-2	Q9NZN4	-2.64118	2.64118	3.8253e-54	228	Q9NZN4-2	EHD2	Isoform 2 of EH domain-containing protein 2	EHD2_HUMAN	34	-83.9703	0.160297	cancer
cancer / NAT	P07355	P07355	P07355	-1.90022	1.90022	9.43489e-54	315	P07355	ANXA2	Annexin A2	ANXA2_HUMAN	45	-73.2098	0.267902	cancer
cancer / NAT	P98095-2	P98095-2	P98095	-2.68795	2.68795	5.02817e-53	273	P98095-2	FBLN2	Isoform 2 of Fibulin-2	FBLN2_HUMAN	57	-84.4816	0.155184	cancer
cancer / NAT	Q9BTE3-2	Q9BTE3-2	Q9BTE3	1.85421	1.85421	7.31772e-53	141	Q9BTE3-2	MCMBP	Isoform 2 of Mini-chromosome maintenance complex-binding protein	MCMBP_HUMAN	36	261.553	3.61553	cancer
cancer / NAT	Q13263	Q13263	Q13263	1.62343	1.62343	1.60512e-52	414	Q13263	TRIM28	Transcription intermediary factor 1-beta	TIF1B_HUMAN	66	208.108	3.08108	cancer
cancer / NAT	P33993	P33993	P33993	2.16661	2.16661	3.00553e-52	264	P33993	MCM7	DNA replication licensing factor MCM7	MCM7_HUMAN	53	348.968	4.48968	cancer
cancer / NAT	Q96AC1;Q96AC1-3	Q96AC1;Q96AC1-3	Q96AC1	-1.87691	1.87691	3.72347e-52	246	Q96AC1;Q96AC1-3	FERMT2	Fermitin family homolog 2;Isoform 3 of Fermitin family homolog 2	FERM2_HUMAN	47	-72.7733	0.272267	cancer
cancer / NAT	Q15393	Q15393	Q15393	0.987577	0.987577	3.87061e-52	354	Q15393	SF3B3	Splicing factor 3B subunit 3	SF3B3_HUMAN	67	98.2853	1.98285	cancer
cancer / NAT	P23378	P23378	P23378	0.413935	0.413935	2.5395e-51	390	P23378	GLDC	Glycine dehydrogenase (decarboxylating), mitochondrial	GCSP_HUMAN	72	33.2315	1.33231	cancer
cancer / NAT	Q93052	Q93052	Q93052	-1.47015	1.47015	2.60858e-51	279	Q93052	LPP	Lipoma-preferred partner	LPP_HUMAN	43	-63.9055	0.360945	cancer
cancer / NAT	P52272	P52272	P52272	1.06154	1.06154	5.16798e-51	651	P52272	HNRNPM	Heterogeneous nuclear ribonucleoprotein M	HNRPM_HUMAN	68	108.715	2.08715	cancer
cancer / NAT	Q14573	Q14573	Q14573	-2.01585	2.01585	7.20364e-51	369	Q14573	ITPR3	Inositol 1,4,5-trisphosphate receptor type 3	ITPR3_HUMAN	108	-75.2731	0.247269	cancer
cancer / NAT	Q5VZK9	Q5VZK9	Q5VZK9	-2.64089	2.64089	7.26012e-51	288	Q5VZK9	CARMIL1	F-actin-uncapping protein LRRC16A	CARL1_HUMAN	87	-83.967	0.16033	cancer
cancer / NAT	P49368-2	P49368-2	P49368	1.14234	1.14234	1.37239e-50	390	P49368-2	CCT3	Isoform 2 of T-complex protein 1 subunit gamma	TCPG_HUMAN	56	120.739	2.20739	cancer
cancer / NAT	P08238	P08238	P08238	1.06577	1.06577	5.54095e-50	522	P08238	HSP90AB1	Heat shock protein HSP 90-beta	HS90B_HUMAN	75	109.328	2.09328	cancer
cancer / NAT	Q13418	Q13418	Q13418	-1.55567	1.55567	5.54095e-50	195	Q13418	ILK	Integrin-linked protein kinase	ILK_HUMAN	29	-65.983	0.34017	cancer
cancer / NAT	Q12797	Q12797	Q12797	-1.38577	1.38577	1.16438e-49	180	Q12797	ASPH	Aspartyl/asparaginyl beta-hydroxylase	ASPH_HUMAN	39	-61.7315	0.382685	cancer
cancer / NAT	P40939	P40939	P40939	-0.703321	0.703321	1.66821e-49	423	P40939	HADHA	Trifunctional enzyme subunit alpha, mitochondrial	ECHA_HUMAN	59	-38.5843	0.614157	cancer
cancer / NAT	Q8N2S1-2	Q8N2S1-2	Q8N2S1	-1.94513	1.94513	2.05238e-49	258	Q8N2S1-2	LTBP4	Isoform 2 of Latent-transforming growth factor beta-binding protein 4	LTBP4_HUMAN	66	-74.0309	0.259691	cancer
cancer / NAT	A2RRP1	A2RRP1	A2RRP1	-1.14056	1.14056	2.76215e-49	285	A2RRP1	NBAS	Neuroblastoma-amplified sequence	NBAS_HUMAN	91	-54.6415	0.453585	cancer
cancer / NAT	O95831	O95831	O95831	-1.80213	1.80213	3.73655e-49	228	O95831	AIFM1	Apoptosis-inducing factor 1, mitochondrial	AIFM1_HUMAN	42	-71.325	0.28675	cancer
cancer / NAT	Q14764	Q14764	Q14764	-1.31801	1.31801	5.25062e-49	396	Q14764	MVP	Major vault protein	MVP_HUMAN	69	-59.8912	0.401088	cancer
cancer / NAT	P30041	P30041	P30041	-1.64108	1.64108	2.28397e-48	222	P30041	PRDX6	Peroxiredoxin-6	PRDX6_HUMAN	33	-67.9383	0.320617	cancer
cancer / NAT	P22676	P22676	P22676	-4.03337	4.03337	4.97309e-48	204	P22676	CALB2	Calretinin	CALB2_HUMAN	30	-93.8929	0.0610711	cancer
cancer / NAT	Q9P2B2	Q9P2B2	Q9P2B2	-2.11113	2.11113	5.75398e-48	129	Q9P2B2	PTGFRN	Prostaglandin F2 receptor negative regulator	FPRP_HUMAN	37	-76.8535	0.231465	cancer
cancer / NAT	Q92841	Q92841	Q92841	1.30666	1.30666	6.03775e-48	282	Q92841	DDX17	Probable ATP-dependent RNA helicase DDX17	DDX17_HUMAN	47	147.369	2.47369	cancer
cancer / NAT	O15523	O15523	O15523	0.936166	0.936166	7.26075e-48	279	O15523	DDX3Y	ATP-dependent RNA helicase DDX3Y	DDX3Y_HUMAN	48	91.3436	1.91344	cancer
cancer / NAT	P36955	P36955	P36955	-2.10015	2.10015	7.65871e-48	99	P36955	SERPINF1	Pigment epithelium-derived factor	PEDF_HUMAN	20	-76.6766	0.233234	cancer
cancer / NAT	P00734	P00734	P00734	-2.13434	2.13434	1.0498e-47	216	P00734	F2	Prothrombin	THRB_HUMAN	44	-77.2229	0.227771	cancer
cancer / NAT	P49748;P49748-3	P49748;P49748-3	P49748	-1.29851	1.29851	3.8921e-47	237	P49748;P49748-3	ACADVL	Very long-chain specific acyl-CoA dehydrogenase, mitochondrial;Isoform 3 of Very long-chain specific acyl-CoA dehydrogenase, mitochondrial	ACADV_HUMAN	45	-59.3454	0.406546	cancer
cancer / NAT	Q9UBG0	Q9UBG0	Q9UBG0	-2.39661	2.39661	4.3524e-47	231	Q9UBG0	MRC2	C-type mannose receptor 2	MRC2_HUMAN	64	-81.0089	0.189911	cancer
cancer / NAT	P50453	P50453	P50453	-1.47459	1.47459	4.38245e-47	162	P50453	SERPINB9	Serpin B9	SPB9_HUMAN	29	-64.0164	0.359836	cancer
cancer / NAT	P17844	P17844	P17844	1.17994	1.17994	6.40353e-47	348	P17844	DDX5	Probable ATP-dependent RNA helicase DDX5	DDX5_HUMAN	57	126.567	2.26567	cancer
cancer / NAT	P00915	P00915	P00915	-1.35765	1.35765	1.02443e-46	123	P00915	CA1	Carbonic anhydrase 1	CAH1_HUMAN	19	-60.9783	0.390217	cancer
cancer / NAT	O94911-3	O94911-3	O94911	-4.27906	4.27906	4.42222e-46	228	O94911-3	ABCA8	Isoform 3 of ATP-binding cassette sub-family A member 8	ABCA8_HUMAN	56	-94.8492	0.0515081	cancer
cancer / NAT	P25205	P25205	P25205	2.00889	2.00889	1.21068e-45	336	P25205	MCM3	DNA replication licensing factor MCM3	MCM3_HUMAN	70	302.473	4.02473	cancer
cancer / NAT	Q9HB71	Q9HB71	Q9HB71	1.70103	1.70103	1.32945e-45	159	Q9HB71	CACYBP	Calcyclin-binding protein	CYBP_HUMAN	27	225.132	3.25132	cancer
cancer / NAT	P12277	P12277	P12277	-1.21383	1.21383	1.73816e-45	207	P12277	CKB	Creatine kinase B-type	KCRB_HUMAN	28	-56.8878	0.431122	cancer
cancer / NAT	O75533	O75533	O75533	0.791273	0.791273	2.81708e-45	498	O75533	SF3B1	Splicing factor 3B subunit 1	SF3B1_HUMAN	89	73.0601	1.7306	cancer
cancer / NAT	Q01484-2;Q01484-5	Q01484-2;Q01484-5	Q01484	-1.71547	1.71547	3.09502e-45	264	Q01484-2;Q01484-5	ANK2	Isoform 2 of Ankyrin-2;Isoform 4 of Ankyrin-2	ANK2_HUMAN	72	-69.5496	0.304504	cancer
cancer / NAT	P05091	P05091	P05091	-2.59586	2.59586	3.25193e-45	198	P05091	ALDH2	Aldehyde dehydrogenase, mitochondrial	ALDH2_HUMAN	38	-83.4587	0.165413	cancer
cancer / NAT	Q16698;Q16698-2	Q16698;Q16698-2	Q16698	-1.25751	1.25751	1.14555e-43	120	Q16698;Q16698-2	DECR1	2,4-dienoyl-CoA reductase, mitochondrial;Isoform 2 of 2,4-dienoyl-CoA reductase, mitochondrial	DECR_HUMAN	24	-58.1734	0.418266	cancer
cancer / NAT	Q04828	Q04828	Q04828	-3.95241	3.95241	1.60243e-43	177	Q04828	AKR1C1	Aldo-keto reductase family 1 member C1	AK1C1_HUMAN	29	-93.5404	0.0645962	cancer
cancer / NAT	Q92598	Q92598	Q92598	1.15436	1.15436	2.17273e-43	384	Q92598	HSPH1	Heat shock protein 105 kDa	HS105_HUMAN	73	122.586	2.22586	cancer
cancer / NAT	Q9Y5S2	Q9Y5S2	Q9Y5S2	-1.30994	1.30994	2.5898e-43	363	Q9Y5S2	CDC42BPB	Serine/threonine-protein kinase MRCK beta	MRCKB_HUMAN	117	-59.6661	0.403339	cancer
cancer / NAT	P00505	P00505	P00505	-1.32595	1.32595	2.76753e-43	240	P00505	GOT2	Aspartate aminotransferase, mitochondrial	AATM_HUMAN	39	-60.1114	0.398886	cancer
cancer / NAT	Q14554	Q14554	Q14554	-1.50171	1.50171	2.87802e-43	282	Q14554	PDIA5	Protein disulfide-isomerase A5	PDIA5_HUMAN	50	-64.6865	0.353135	cancer
cancer / NAT	P50990	P50990	P50990	1.03075	1.03075	2.88673e-43	429	P50990	CCT8	T-complex protein 1 subunit theta	TCPQ_HUMAN	61	104.308	2.04308	cancer
cancer / NAT	O75891;O75891-3	O75891;O75891-3	O75891	-1.62245	1.62245	3.30357e-43	240	O75891;O75891-3	ALDH1L1	Cytosolic 10-formyltetrahydrofolate dehydrogenase;Isoform 3 of Cytosolic 10-formyltetrahydrofolate dehydrogenase	AL1L1_HUMAN	58	-67.5217	0.324783	cancer
cancer / NAT	P06396-2	P06396-2	P06396	-0.735277	0.735277	4.85001e-43	408	P06396-2	GSN	Isoform 2 of Gelsolin	GELS_HUMAN	56	-39.9297	0.600703	cancer
cancer / NAT	Q9UBX5	Q9UBX5	Q9UBX5	-1.68463	1.68463	4.95025e-43	114	Q9UBX5	FBLN5	Fibulin-5	FBLN5_HUMAN	19	-68.8918	0.311082	cancer
cancer / NAT	P02760	P02760	P02760	-1.91134	1.91134	6.60173e-43	111	P02760	AMBP	Protein AMBP	AMBP_HUMAN	17	-73.4154	0.265846	cancer
cancer / NAT	Q96CW1-2	Q96CW1-2	Q96CW1	-1.1005	1.1005	8.55981e-43	147	Q96CW1-2	AP2M1	Isoform 2 of AP-2 complex subunit mu	AP2M1_HUMAN	31	-53.3646	0.466354	cancer
cancer / NAT	Q14690	Q14690	Q14690	1.29739	1.29739	9.53704e-43	549	Q14690	PDCD11	Protein RRP5 homolog	RRP5_HUMAN	124	145.784	2.45784	cancer
cancer / NAT	Q9BYF1	Q9BYF1	Q9BYF1	-4.48756	4.48756	1.60604e-42	201	Q9BYF1	ACE2	Angiotensin-converting enzyme 2	ACE2_HUMAN	38	-95.5423	0.0445768	cancer
cancer / NAT	Q63ZY3;Q63ZY3-3	Q63ZY3;Q63ZY3-3	Q63ZY3	-2.32316	2.32316	2.15998e-42	222	Q63ZY3;Q63ZY3-3	KANK2	KN motif and ankyrin repeat domain-containing protein 2;Isoform 3 of KN motif and ankyrin repeat domain-containing protein 2	KANK2_HUMAN	50	-80.017	0.19983	cancer
cancer / NAT	Q5T5P2	Q5T5P2	Q5T5P2	-2.74325	2.74325	5.72618e-42	261	Q5T5P2	KIAA1217	Sickle tail protein homolog	SKT_HUMAN	100	-85.0652	0.149348	cancer
cancer / NAT	P01008	P01008	P01008	-2.29384	2.29384	6.6472e-42	228	P01008	SERPINC1	Antithrombin-III	ANT3_HUMAN	38	-79.6067	0.203933	cancer
cancer / NAT	P55268	P55268	P55268	-1.08298	1.08298	8.67938e-42	507	P55268	LAMB2	Laminin subunit beta-2	LAMB2_HUMAN	110	-52.7947	0.472053	cancer
cancer / NAT	O95479	O95479	O95479	-2.30813	2.30813	8.67938e-42	228	O95479	H6PD	GDH/6PGL endoplasmic bifunctional protein	G6PE_HUMAN	48	-79.8078	0.201922	cancer
cancer / NAT	Q9C0C2	Q9C0C2	Q9C0C2	-1.37904	1.37904	1.36982e-41	324	Q9C0C2	TNKS1BP1	182 kDa tankyrase-1-binding protein	TB182_HUMAN	102	-61.5525	0.384475	cancer
cancer / NAT	P10809	P10809	P10809	1.24841	1.24841	2.16189e-41	471	P10809	HSPD1	60 kDa heat shock protein, mitochondrial	CH60_HUMAN	75	137.579	2.37579	cancer
cancer / NAT	P21964;P21964-2	P21964;P21964-2	P21964	-2.38361	2.38361	2.52112e-41	171	P21964;P21964-2	COMT	Catechol O-methyltransferase;Isoform Soluble of Catechol O-methyltransferase	COMT_HUMAN	27	-80.837	0.19163	cancer
cancer / NAT	Q5UIP0	Q5UIP0	Q5UIP0	1.8159	1.8159	2.69088e-41	360	Q5UIP0	RIF1	Telomere-associated protein RIF1	RIF1_HUMAN	124	252.08	3.5208	cancer
cancer / NAT	Q13620;Q13620-1	Q13620;Q13620-1	Q13620	-1.39475	1.39475	2.90794e-41	291	Q13620;Q13620-1	CUL4B	Cullin-4B;Isoform 2 of Cullin-4B	CUL4B_HUMAN	66	-61.969	0.38031	cancer
cancer / NAT	Q14139;Q14139-2	Q14139;Q14139-2	Q14139	-1.41899	1.41899	3.70694e-41	126	Q14139;Q14139-2	UBE4A	Ubiquitin conjugation factor E4 A;Isoform 2 of Ubiquitin conjugation factor E4 A	UBE4A_HUMAN	38	-62.6027	0.373973	cancer
cancer / NAT	Q13228;Q13228-4	Q13228;Q13228-4	Q13228	-3.07931	3.07931	4.07724e-41	204	Q13228;Q13228-4	SELENBP1	Methanethiol oxidase;Isoform 4 of Methanethiol oxidase	SBP1_HUMAN	43	-88.1687	0.118313	cancer
cancer / NAT	P37235	P37235	P37235	-2.21972	2.21972	4.82224e-41	87	P37235	HPCAL1	Hippocalcin-like protein 1	HPCL1_HUMAN	17	-78.5318	0.214682	cancer
cancer / NAT	Q16836;Q16836-2;Q16836-3	Q16836;Q16836-2;Q16836-3	Q16836	-1.62299	1.62299	5.25555e-41	159	Q16836;Q16836-2;Q16836-3	HADH	Hydroxyacyl-coenzyme A dehydrogenase, mitochondrial;Isoform 2 of Hydroxyacyl-coenzyme A dehydrogenase, mitochondrial;Isoform 3 of Hydroxyacyl-coenzyme A dehydrogenase, mitochondrial	HCDH_HUMAN	24	-67.5339	0.324661	cancer
cancer / NAT	Q16666	Q16666	Q16666	1.69411	1.69411	5.34833e-41	363	Q16666	IFI16	Gamma-interferon-inducible protein 16	IF16_HUMAN	59	223.578	3.23578	cancer
cancer / NAT	O43390-2	O43390-2	O43390	0.688077	0.688077	7.56986e-41	243	O43390-2	HNRNPR	Isoform 2 of Heterogeneous nuclear ribonucleoprotein R	HNRPR_HUMAN	40	61.1134	1.61113	cancer
cancer / NAT	P01019	P01019	P01019	-1.8982	1.8982	8.06908e-41	96	P01019	AGT	Angiotensinogen	ANGT_HUMAN	19	-73.1723	0.268277	cancer
cancer / NAT	P01011	P01011	P01011	-1.52818	1.52818	1.26389e-40	192	P01011	SERPINA3	Alpha-1-antichymotrypsin	AACT_HUMAN	31	-65.3286	0.346714	cancer
cancer / NAT	P50440-2	P50440-2	P50440	-2.61993	2.61993	1.36404e-40	183	P50440-2	GATM	Isoform 2 of Glycine amidinotransferase, mitochondrial	GATM_HUMAN	34	-83.7324	0.162676	cancer
cancer / NAT	Q14566	Q14566	Q14566	2.07297	2.07297	1.50664e-40	270	Q14566	MCM6	DNA replication licensing factor MCM6	MCM6_HUMAN	60	320.753	4.20753	cancer
cancer / NAT	P06727	P06727	P06727	-1.77168	1.77168	2.13928e-40	240	P06727	APOA4	Apolipoprotein A-IV	APOA4_HUMAN	43	-70.7133	0.292867	cancer
cancer / NAT	P05108	P05108	P05108	-4.22913	4.22913	2.50853e-40	186	P05108	CYP11A1	Cholesterol side-chain cleavage enzyme, mitochondrial	CP11A_HUMAN	35	-94.6678	0.0533218	cancer
cancer / NAT	Q86UP2	Q86UP2	Q86UP2	-0.717998	0.717998	2.51872e-40	630	Q86UP2	KTN1	Kinectin	KTN1_HUMAN	141	-39.2059	0.607941	cancer
cancer / NAT	P09104	P09104	P09104	2.52429	2.52429	3.26777e-40	126	P09104	ENO2	Gamma-enolase	ENOG_HUMAN	21	475.291	5.75291	cancer
cancer / NAT	P08758	P08758	P08758	-1.65649	1.65649	3.70555e-40	258	P08758	ANXA5	Annexin A5	ANXA5_HUMAN	39	-68.279	0.31721	cancer
cancer / NAT	P36871	P36871	P36871	-0.899157	0.899157	4.13903e-40	228	P36871	PGM1	Phosphoglucomutase-1	PGM1_HUMAN	42	-46.38	0.5362	cancer
cancer / NAT	Q96CV9	Q96CV9	Q96CV9	-0.917784	0.917784	4.13903e-40	159	Q96CV9	OPTN	Optineurin	OPTN_HUMAN	38	-47.0679	0.529321	cancer
cancer / NAT	P16444	P16444	P16444	-3.66309	3.66309	6.37373e-40	150	P16444	DPEP1	Dipeptidase 1	DPEP1_HUMAN	22	-92.1059	0.0789407	cancer
cancer / NAT	Q9UPN3	Q9UPN3	Q9UPN3	-0.935942	0.935942	6.37373e-40	960	Q9UPN3	MACF1	Microtubule-actin cross-linking factor 1, isoforms 1/2/3/5	MACF1_HUMAN	405	-47.7299	0.522701	cancer
cancer / NAT	Q9Y6C2	Q9Y6C2	Q9Y6C2	-1.41716	1.41716	7.70638e-40	264	Q9Y6C2	EMILIN1	EMILIN-1	EMIL1_HUMAN	56	-62.5552	0.374448	cancer
cancer / NAT	Q5JSL3	Q5JSL3	Q5JSL3	1.84942	1.84942	7.93439e-40	387	Q5JSL3	DOCK11	Dedicator of cytokinesis protein 11	DOC11_HUMAN	112	260.354	3.60354	cancer
cancer / NAT	P07585	P07585	P07585	-2.1179	2.1179	8.01448e-40	153	P07585	DCN	Decorin	PGS2_HUMAN	27	-76.9618	0.230382	cancer
cancer / NAT	O75874	O75874	O75874	-1.37888	1.37888	9.07853e-40	267	O75874	IDH1	Isocitrate dehydrogenase [NADP] cytoplasmic	IDHC_HUMAN	39	-61.5482	0.384518	cancer
cancer / NAT	Q14315	Q14315	Q14315	0.613783	0.613783	1.1231e-39	417	Q14315	FLNC	Filamin-C	FLNC_HUMAN	147	53.0267	1.53027	cancer
cancer / NAT	Q00610;Q00610-2	Q00610;Q00610-2	Q00610	-0.214667	0.214667	1.97389e-39	864	Q00610;Q00610-2	CLTC	Clathrin heavy chain 1;Isoform 2 of Clathrin heavy chain 1	CLH1_HUMAN	128	-13.8255	0.861745	cancer
cancer / NAT	O94760	O94760	O94760	-0.333804	0.333804	2.13148e-39	174	O94760	DDAH1	N(G),N(G)-dimethylarginine dimethylaminohydrolase 1	DDAH1_HUMAN	28	-20.6559	0.793441	cancer
cancer / NAT	P02549	P02549	P02549	-1.54787	1.54787	2.53498e-39	408	P02549	SPTA1	Spectrin alpha chain, erythrocytic 1	SPTA1_HUMAN	142	-65.7985	0.342015	cancer
cancer / NAT	P09543;P09543-2	P09543;P09543-2	P09543	-0.997932	0.997932	2.62216e-39	150	P09543;P09543-2	CNP	2',3'-cyclic-nucleotide 3'-phosphodiesterase;Isoform CNPI of 2',3'-cyclic-nucleotide 3'-phosphodiesterase	CN37_HUMAN	30	-49.9283	0.500717	cancer
cancer / NAT	P22307	P22307	P22307	-1.72148	1.72148	2.83206e-39	231	P22307	SCP2	Non-specific lipid-transfer protein	NLTP_HUMAN	41	-69.6763	0.303237	cancer
cancer / NAT	P25311	P25311	P25311	-1.73818	1.73818	3.1268e-39	108	P25311	AZGP1	Zinc-alpha-2-glycoprotein	ZA2G_HUMAN	20	-70.0252	0.299748	cancer
cancer / NAT	P27694	P27694	P27694	1.36526	1.36526	3.52515e-39	240	P27694	RPA1	Replication protein A 70 kDa DNA-binding subunit	RFA1_HUMAN	50	157.622	2.57622	cancer
cancer / NAT	P17655	P17655	P17655	-1.93356	1.93356	4.32499e-39	246	P17655	CAPN2	Calpain-2 catalytic subunit	CAN2_HUMAN	42	-73.8218	0.261782	cancer
cancer / NAT	P14543	P14543	P14543	-0.870937	0.870937	4.54505e-39	291	P14543	NID1	Nidogen-1	NID1_HUMAN	66	-45.3208	0.546792	cancer
cancer / NAT	Q96KG9;Q96KG9-2;Q96KG9-3	Q96KG9;Q96KG9-2;Q96KG9-3	Q96KG9	-0.806388	0.806388	6.29344e-39	138	Q96KG9;Q96KG9-2;Q96KG9-3	SCYL1	N-terminal kinase-like protein;Isoform 2 of N-terminal kinase-like protein;Isoform 3 of N-terminal kinase-like protein	SCYL1_HUMAN	46	-42.8188	0.571812	cancer
cancer / NAT	P12931;P12931-2	P12931;P12931-2	P12931	-1.51819	1.51819	1.16696e-38	123	P12931;P12931-2	SRC	Proto-oncogene tyrosine-protein kinase Src;Isoform 2 of Proto-oncogene tyrosine-protein kinase Src	SRC_HUMAN	30	-65.0877	0.349123	cancer
cancer / NAT	Q10570	Q10570	Q10570	1.25838	1.25838	1.36193e-38	291	Q10570	CPSF1	Cleavage and polyadenylation specificity factor subunit 1	CPSF1_HUMAN	79	139.227	2.39227	cancer
cancer / NAT	P48147	P48147	P48147	-1.44031	1.44031	3.46067e-38	282	P48147	PREP	Prolyl endopeptidase	PPCE_HUMAN	60	-63.1512	0.368488	cancer
cancer / NAT	P27708	P27708	P27708	0.920253	0.920253	4.75332e-38	522	P27708	CAD	CAD protein	PYR1_HUMAN	119	89.2447	1.89245	cancer
cancer / NAT	P24928	P24928	P24928	0.789369	0.789369	6.07626e-38	402	P24928	POLR2A	DNA-directed RNA polymerase II subunit RPB1	RPB1_HUMAN	111	72.8318	1.72832	cancer
cancer / NAT	Q13586	Q13586	Q13586	-1.99195	1.99195	9.94069e-38	177	Q13586	STIM1	Stromal interaction molecule 1	STIM1_HUMAN	42	-74.86	0.2514	cancer
cancer / NAT	Q08380	Q08380	Q08380	-2.77528	2.77528	1.3697e-37	105	Q08380	LGALS3BP	Galectin-3-binding protein	LG3BP_HUMAN	22	-85.3931	0.146069	cancer
cancer / NAT	P20700	P20700	P20700	1.17813	1.17813	1.39603e-37	345	P20700	LMNB1	Lamin-B1	LMNB1_HUMAN	63	126.283	2.26283	cancer
cancer / NAT	P00736	P00736	P00736	-2.20108	2.20108	1.89377e-37	132	P00736	C1R	Complement C1r subcomponent	C1R_HUMAN	30	-78.2526	0.217474	cancer
cancer / NAT	Q9UHQ9	Q9UHQ9	Q9UHQ9	-2.56417	2.56417	2.2944e-37	180	Q9UHQ9	CYB5R1	NADH-cytochrome b5 reductase 1	NB5R1_HUMAN	28	-83.0914	0.169086	cancer
cancer / NAT	Q15121;Q15121-2	Q15121;Q15121-2	Q15121	-1.96205	1.96205	3.17864e-37	75	Q15121;Q15121-2	PEA15	Astrocytic phosphoprotein PEA-15;Isoform 2 of Astrocytic phosphoprotein PEA-15	PEA15_HUMAN	13	-74.3337	0.256663	cancer
cancer / NAT	O95425-3	O95425-3	O95425	-1.287	1.287	3.43407e-37	309	O95425-3	SVIL	Isoform SV3 of Supervillin	SVIL_HUMAN	120	-59.0197	0.409803	cancer
cancer / NAT	P11766	P11766	P11766	-1.34048	1.34048	3.8332e-37	171	P11766	ADH5	Alcohol dehydrogenase class-3	ADHX_HUMAN	32	-60.511	0.39489	cancer
cancer / NAT	Q5JTH9	Q5JTH9	Q5JTH9	1.22628	1.22628	4.44883e-37	288	Q5JTH9	RRP12	RRP12-like protein	RRP12_HUMAN	73	133.962	2.33962	cancer
cancer / NAT	O14639-6	O14639-6	O14639	-2.66019	2.66019	4.69649e-37	186	O14639-6	ABLIM1	Isoform 6 of Actin-binding LIM protein 1	ABLM1_HUMAN	52	-84.1801	0.158199	cancer
cancer / NAT	P11908-2	P11908-2	P11908	-4.1415	4.1415	7.3342e-37	150	P11908-2	PRPS2	Isoform 2 of Ribose-phosphate pyrophosphokinase 2	PRPS2_HUMAN	21	-94.3339	0.056661	cancer
cancer / NAT	Q9UIJ7	Q9UIJ7	Q9UIJ7	-1.45565	1.45565	8.60283e-37	120	Q9UIJ7	AK3	GTP:AMP phosphotransferase AK3, mitochondrial	KAD3_HUMAN	23	-63.541	0.36459	cancer
cancer / NAT	P10643	P10643	P10643	-2.03894	2.03894	8.91234e-37	180	P10643	C7	Complement component C7	CO7_HUMAN	43	-75.6658	0.243342	cancer
cancer / NAT	Q15392;Q15392-2	Q15392;Q15392-2	Q15392	-3.35983	3.35983	9.13017e-37	171	Q15392;Q15392-2	DHCR24	Delta(24)-sterol reductase;Isoform 2 of Delta(24)-sterol reductase	DHC24_HUMAN	27	-90.2593	0.097407	cancer
cancer / NAT	Q27J81	Q27J81	Q27J81	-2.02505	2.02505	1.07022e-36	192	Q27J81	INF2	Inverted formin-2	INF2_HUMAN	60	-75.4303	0.245697	cancer
cancer / NAT	Q9NY15	Q9NY15	Q9NY15	-1.85808	1.85808	1.48731e-36	243	Q9NY15	STAB1	Stabilin-1	STAB1_HUMAN	83	-72.4157	0.275843	cancer
cancer / NAT	Q13451	Q13451	Q13451	-1.42814	1.42814	1.53931e-36	252	Q13451	FKBP5	Peptidyl-prolyl cis-trans isomerase FKBP5	FKBP5_HUMAN	46	-62.8391	0.371609	cancer
cancer / NAT	Q9HAV4	Q9HAV4	Q9HAV4	1.52525	1.52525	1.88596e-36	366	Q9HAV4	XPO5	Exportin-5	XPO5_HUMAN	72	187.836	2.87836	cancer
cancer / NAT	P69905	P69905	P69905	-1.45557	1.45557	2.08159e-36	264	P69905	HBA1	Hemoglobin subunit alpha	HBA_HUMAN	27	-63.539	0.36461	cancer
cancer / NAT	P12109	P12109	P12109	-1.63072	1.63072	2.38809e-36	261	P12109	COL6A1	Collagen alpha-1(VI) chain	CO6A1_HUMAN	59	-67.7072	0.322928	cancer
cancer / NAT	P35914	P35914	P35914	-1.28861	1.28861	3.75424e-36	90	P35914	HMGCL	Hydroxymethylglutaryl-CoA lyase, mitochondrial	HMGCL_HUMAN	18	-59.0654	0.409346	cancer
cancer / NAT	P00568	P00568	P00568	-3.18929	3.18929	8.62725e-36	141	P00568	AK1	Adenylate kinase isoenzyme 1	KAD1_HUMAN	22	-89.037	0.10963	cancer
cancer / NAT	P22102	P22102	P22102	1.04746	1.04746	8.73376e-36	363	P22102	GART	Trifunctional purine biosynthetic protein adenosine-3	PUR2_HUMAN	66	106.689	2.06689	cancer
cancer / NAT	P22087	P22087	P22087	1.51231	1.51231	9.54257e-36	192	P22087	FBL	rRNA 2'-O-methyltransferase fibrillarin	FBRL_HUMAN	26	185.267	2.85267	cancer
cancer / NAT	P47895	P47895	P47895	-3.10397	3.10397	9.96137e-36	168	P47895	ALDH1A3	Aldehyde dehydrogenase family 1 member A3	AL1A3_HUMAN	35	-88.3692	0.116308	cancer
cancer / NAT	Q9UDY2;Q9UDY2-3;Q9UDY2-7	Q9UDY2;Q9UDY2-3;Q9UDY2-7	Q9UDY2	-1.3073	1.3073	1.03883e-35	222	Q9UDY2;Q9UDY2-3;Q9UDY2-7	TJP2	Tight junction protein ZO-2;Isoform C1 of Tight junction protein ZO-2;Isoform 7 of Tight junction protein ZO-2	ZO2_HUMAN	64	-59.5923	0.404077	cancer
cancer / NAT	O15067	O15067	O15067	1.16621	1.16621	1.68704e-35	378	O15067	PFAS	Phosphoribosylformylglycinamidine synthase	PUR4_HUMAN	72	124.422	2.24422	cancer
cancer / NAT	Q14BN4;Q14BN4-2;Q14BN4-3	Q14BN4;Q14BN4-2;Q14BN4-3	Q14BN4	-3.03077	3.03077	2.63038e-35	249	Q14BN4;Q14BN4-2;Q14BN4-3	SLMAP	Sarcolemmal membrane-associated protein;Isoform 2 of Sarcolemmal membrane-associated protein;Isoform 3 of Sarcolemmal membrane-associated protein	SLMAP_HUMAN	61	-87.7638	0.122362	cancer
cancer / NAT	P41250	P41250	P41250	1.40446	1.40446	3.63189e-35	378	P41250	GARS	Glycine--tRNA ligase	GARS_HUMAN	64	164.719	2.64719	cancer
cancer / NAT	P09486	P09486	P09486	-2.02748	2.02748	5.15759e-35	102	P09486	SPARC	SPARC	SPRC_HUMAN	17	-75.4716	0.245284	cancer
cancer / NAT	Q14624-2;Q14624-3	Q14624-2;Q14624-3	Q14624	-1.76378	1.76378	5.687e-35	270	Q14624-2;Q14624-3	ITIH4	Isoform 2 of Inter-alpha-trypsin inhibitor heavy chain H4;Isoform 3 of Inter-alpha-trypsin inhibitor heavy chain H4	ITIH4_HUMAN	48	-70.5525	0.294475	cancer
cancer / NAT	Q07864	Q07864	Q07864	1.40608	1.40608	5.70845e-35	324	Q07864	POLE	DNA polymerase epsilon catalytic subunit A	DPOE1_HUMAN	113	165.017	2.65017	cancer
cancer / NAT	P42765	P42765	P42765	-1.20665	1.20665	7.17624e-35	216	P42765	ACAA2	3-ketoacyl-CoA thiolase, mitochondrial	THIM_HUMAN	37	-56.6725	0.433275	cancer
cancer / NAT	Q9UQ35	Q9UQ35	Q9UQ35	1.22855	1.22855	7.28165e-35	411	Q9UQ35	SRRM2	Serine/arginine repetitive matrix protein 2	SRRM2_HUMAN	100	134.332	2.34332	cancer
cancer / NAT	P02749	P02749	P02749	-1.93288	1.93288	1.11335e-34	147	P02749	APOH	Beta-2-glycoprotein 1	APOH_HUMAN	29	-73.8094	0.261906	cancer
cancer / NAT	Q15124	Q15124	Q15124	-1.44696	1.44696	1.15901e-34	129	Q15124	PGM5	Phosphoglucomutase-like protein 5	PGM5_HUMAN	34	-63.3207	0.366793	cancer
cancer / NAT	O15382	O15382	O15382	-1.71176	1.71176	1.32883e-34	114	O15382	BCAT2	Branched-chain-amino-acid aminotransferase, mitochondrial	BCAT2_HUMAN	22	-69.4713	0.305287	cancer
cancer / NAT	Q07157-2	Q07157-2	Q07157	-1.22534	1.22534	1.38834e-34	474	Q07157-2	TJP1	Isoform Short of Tight junction protein ZO-1	ZO1_HUMAN	116	-57.2302	0.427698	cancer
cancer / NAT	P10768	P10768	P10768	-1.94978	1.94978	1.50035e-34	120	P10768	ESD	S-formylglutathione hydrolase	ESTD_HUMAN	20	-74.1143	0.258857	cancer
cancer / NAT	P78371	P78371	P78371	1.03148	1.03148	2.2087e-34	387	P78371	CCT2	T-complex protein 1 subunit beta	TCPB_HUMAN	51	104.412	2.04412	cancer
cancer / NAT	P51884	P51884	P51884	-1.69904	1.69904	2.42368e-34	111	P51884	LUM	Lumican	LUM_HUMAN	21	-69.2009	0.307991	cancer
cancer / NAT	P33991	P33991	P33991	1.83386	1.83386	3.91502e-34	300	P33991	MCM4	DNA replication licensing factor MCM4	MCM4_HUMAN	61	256.489	3.56489	cancer
cancer / NAT	Q8IWX8	Q8IWX8	Q8IWX8	1.17201	1.17201	4.23517e-34	162	Q8IWX8	CHERP	Calcium homeostasis endoplasmic reticulum protein	CHERP_HUMAN	34	125.326	2.25326	cancer
cancer / NAT	O95428	O95428	O95428	-1.88629	1.88629	6.07371e-34	186	O95428	PAPLN	Papilin	PPN_HUMAN	47	-72.9499	0.270501	cancer
cancer / NAT	P27361	P27361	P27361	-0.773048	0.773048	7.57123e-34	129	P27361	MAPK3	Mitogen-activated protein kinase 3	MK03_HUMAN	21	-41.482	0.58518	cancer
cancer / NAT	P49321	P49321	P49321	1.52673	1.52673	8.27985e-34	378	P49321	NASP	Nuclear autoantigenic sperm protein	NASP_HUMAN	71	188.133	2.88133	cancer
cancer / NAT	P68871	P68871	P68871	-1.31559	1.31559	8.30651e-34	192	P68871	HBB	Hemoglobin subunit beta	HBB_HUMAN	26	-59.824	0.40176	cancer
cancer / NAT	Q9UHD8	Q9UHD8	Q9UHD8	-1.15811	1.15811	1.39391e-33	255	Q9UHD8	2009-09-01	Septin-9	SEPT9_HUMAN	51	-55.1902	0.448098	cancer
cancer / NAT	P05186	P05186	P05186	2.28266	2.28266	1.46392e-33	225	P05186	ALPL	Alkaline phosphatase, tissue-nonspecific isozyme	PPBT_HUMAN	34	386.576	4.86576	cancer
cancer / NAT	P02675	P02675	P02675	-0.623939	0.623939	1.46977e-33	360	P02675	FGB	Fibrinogen beta chain	FIBB_HUMAN	55	-35.1103	0.648897	cancer
cancer / NAT	Q13573	Q13573	Q13573	1.17592	1.17592	1.61694e-33	168	Q13573	SNW1	SNW domain-containing protein 1	SNW1_HUMAN	36	125.937	2.25937	cancer
cancer / NAT	P19823	P19823	P19823	-1.59686	1.59686	1.73255e-33	222	P19823	ITIH2	Inter-alpha-trypsin inhibitor heavy chain H2	ITIH2_HUMAN	39	-66.9405	0.330595	cancer
cancer / NAT	P43246	P43246	P43246	1.65685	1.65685	2.61949e-33	321	P43246	MSH2	DNA mismatch repair protein Msh2	MSH2_HUMAN	64	215.328	3.15328	cancer
cancer / NAT	O00764	O00764	O00764	-1.69578	1.69578	2.68879e-33	144	O00764	PDXK	Pyridoxal kinase	PDXK_HUMAN	25	-69.1313	0.308687	cancer
cancer / NAT	Q9UEY8-2	Q9UEY8-2	Q9UEY8	-2.28508	2.28508	3.29274e-33	216	Q9UEY8-2	ADD3	Isoform 1 of Gamma-adducin	ADDG_HUMAN	47	-79.4826	0.205174	cancer
cancer / NAT	P31937	P31937	P31937	-1.25862	1.25862	3.38501e-33	120	P31937	HIBADH	3-hydroxyisobutyrate dehydrogenase, mitochondrial	3HIDH_HUMAN	21	-58.2057	0.417943	cancer
cancer / NAT	Q9Y2J2-2	Q9Y2J2-2	Q9Y2J2	-1.03084	1.03084	3.76028e-33	288	Q9Y2J2-2	EPB41L3	Isoform 2 of Band 4.1-like protein 3	E41L3_HUMAN	69	-51.0574	0.489426	cancer
cancer / NAT	P00492	P00492	P00492	-2.81943	2.81943	4.91482e-33	111	P00492	HPRT1	Hypoxanthine-guanine phosphoribosyltransferase	HPRT_HUMAN	15	-85.8334	0.141666	cancer
cancer / NAT	O60502	O60502	O60502	1.23748	1.23748	5.58905e-33	315	O60502	MGEA5	Protein O-GlcNAcase	OGA_HUMAN	67	135.786	2.35786	cancer
cancer / NAT	Q92797	Q92797	Q92797	1.04394	1.04394	6.49322e-33	294	Q92797	SYMPK	Symplekin	SYMPK_HUMAN	81	106.185	2.06185	cancer
cancer / NAT	Q13283	Q13283	Q13283	1.4484	1.4484	7.46088e-33	156	Q13283	G3BP1	Ras GTPase-activating protein-binding protein 1	G3BP1_HUMAN	27	172.905	2.72905	cancer
cancer / NAT	Q15785	Q15785	Q15785	-1.21606	1.21606	9.02306e-33	138	Q15785	TOMM34	Mitochondrial import receptor subunit TOM34	TOM34_HUMAN	30	-56.9544	0.430456	cancer
cancer / NAT	P48163	P48163	P48163	-3.20517	3.20517	9.29022e-33	168	P48163	ME1	NADP-dependent malic enzyme	MAOX_HUMAN	34	-89.1571	0.108429	cancer
cancer / NAT	O94826	O94826	O94826	1.40113	1.40113	9.29022e-33	279	O94826	TOMM70	Mitochondrial import receptor subunit TOM70	TOM70_HUMAN	51	164.109	2.64109	cancer
cancer / NAT	Q9NR19;Q9NR19-2	Q9NR19;Q9NR19-2	Q9NR19	-1.53892	1.53892	1.04584e-32	96	Q9NR19;Q9NR19-2	ACSS2	Acetyl-coenzyme A synthetase, cytoplasmic;Isoform 2 of Acetyl-coenzyme A synthetase, cytoplasmic	ACSA_HUMAN	27	-65.5858	0.344142	cancer
cancer / NAT	P69891	P69891	P69891	-1.29514	1.29514	1.09428e-32	99	P69891	HBG1	Hemoglobin subunit gamma-1	HBG1_HUMAN	16	-59.2504	0.407496	cancer
cancer / NAT	Q9NY93	Q9NY93	Q9NY93	1.60981	1.60981	1.33857e-32	126	Q9NY93	DDX56	Probable ATP-dependent RNA helicase DDX56	DDX56_HUMAN	31	205.211	3.05211	cancer
cancer / NAT	O95602	O95602	O95602	1.35691	1.35691	1.42871e-32	285	O95602	POLR1A	DNA-directed RNA polymerase I subunit RPA1	RPA1_HUMAN	101	156.137	2.56137	cancer
cancer / NAT	Q9HCC0	Q9HCC0	Q9HCC0	-0.905339	0.905339	1.8626e-32	138	Q9HCC0	MCCC2	Methylcrotonoyl-CoA carboxylase beta chain, mitochondrial	MCCB_HUMAN	33	-46.6093	0.533907	cancer
cancer / NAT	P21589	P21589	P21589	-3.26324	3.26324	2.29386e-32	162	P21589	NT5E	5'-nucleotidase	5NTD_HUMAN	35	-89.5848	0.104152	cancer
cancer / NAT	P08575;P08575-4	P08575;P08575-4	P08575	1.5446	1.5446	2.38711e-32	309	P08575;P08575-4	PTPRC	Receptor-type tyrosine-protein phosphatase C;Isoform 2 of Receptor-type tyrosine-protein phosphatase C	PTPRC_HUMAN	74	191.722	2.91722	cancer
cancer / NAT	O75155	O75155	O75155	-1.87875	1.87875	2.51277e-32	225	O75155	CAND2	Cullin-associated NEDD8-dissociated protein 2	CAND2_HUMAN	56	-72.8081	0.271919	cancer
cancer / NAT	Q6NVY1	Q6NVY1	Q6NVY1	-1.09673	1.09673	2.58904e-32	150	Q6NVY1	HIBCH	3-hydroxyisobutyryl-CoA hydrolase, mitochondrial	HIBCH_HUMAN	29	-53.2423	0.467577	cancer
cancer / NAT	P23919	P23919	P23919	1.06077	1.06077	2.6627e-32	90	P23919	DTYMK	Thymidylate kinase	KTHY_HUMAN	20	108.605	2.08605	cancer
cancer / NAT	P34897;P34897-3	P34897;P34897-3	P34897	1.2877	1.2877	3.44122e-32	162	P34897;P34897-3	SHMT2	Serine hydroxymethyltransferase, mitochondrial;Isoform 3 of Serine hydroxymethyltransferase, mitochondrial	GLYM_HUMAN	35	144.138	2.44138	cancer
cancer / NAT	P35237	P35237	P35237	-1.86783	1.86783	4.55487e-32	147	P35237	SERPINB6	Serpin B6	SPB6_HUMAN	27	-72.6014	0.273986	cancer
cancer / NAT	O00116	O00116	O00116	-1.22237	1.22237	4.79104e-32	153	O00116	AGPS	Alkyldihydroxyacetonephosphate synthase, peroxisomal	ADAS_HUMAN	39	-57.1421	0.428579	cancer
cancer / NAT	P60891	P60891	P60891	-3.71109	3.71109	5.30133e-32	198	P60891	PRPS1	Ribose-phosphate pyrophosphokinase 1	PRPS1_HUMAN	34	-92.3643	0.0763571	cancer
cancer / NAT	P0DOX5	P0DOX5	P0DOX5	-0.68481	0.68481	5.40392e-32	243	P0DOX5	NaN	Immunoglobulin gamma-1 heavy chain	IGG1_HUMAN	41	-37.7912	0.622088	cancer
cancer / NAT	P13716	P13716	P13716	-1.68229	1.68229	5.6191e-32	162	P13716	ALAD	Delta-aminolevulinic acid dehydratase	HEM2_HUMAN	26	-68.8413	0.311587	cancer
cancer / NAT	P11940	P11940	P11940	1.24758	1.24758	5.86762e-32	345	P11940	PABPC1	Polyadenylate-binding protein 1	PABP1_HUMAN	51	137.443	2.37443	cancer
cancer / NAT	Q9HC38-2	Q9HC38-2	Q9HC38	-0.767438	0.767438	6.29337e-32	162	Q9HC38-2	GLOD4	Isoform 2 of Glyoxalase domain-containing protein 4	GLOD4_HUMAN	27	-41.254	0.58746	cancer
cancer / NAT	P16615	P16615	P16615	-0.88091	0.88091	6.74423e-32	309	P16615	ATP2A2	Sarcoplasmic/endoplasmic reticulum calcium ATPase 2	AT2A2_HUMAN	59	-45.6975	0.543025	cancer
cancer / NAT	P28340	P28340	P28340	1.58034	1.58034	1.02845e-31	204	P28340	POLD1	DNA polymerase delta catalytic subunit	DPOD1_HUMAN	71	199.04	2.9904	cancer
cancer / NAT	P27695	P27695	P27695	1.09313	1.09313	1.06904e-31	204	P27695	APEX1	DNA-(apurinic or apyrimidinic site) lyase	APEX1_HUMAN	34	113.336	2.13336	cancer
cancer / NAT	O15031	O15031	O15031	-1.07886	1.07886	1.49474e-31	225	O15031	PLXNB2	Plexin-B2	PLXB2_HUMAN	77	-52.6598	0.473402	cancer
cancer / NAT	Q9UQ80-2	Q9UQ80-2	Q9UQ80	0.971145	0.971145	1.51133e-31	183	Q9UQ80-2	PA2G4	Isoform 2 of Proliferation-associated protein 2G4	PA2G4_HUMAN	33	96.0396	1.9604	cancer
cancer / NAT	Q9NZB2	Q9NZB2	Q9NZB2	-0.661348	0.661348	1.58511e-31	210	Q9NZB2	FAM120A	Constitutive coactivator of PPAR-gamma-like protein 1	F120A_HUMAN	60	-36.7713	0.632287	cancer
cancer / NAT	P49736	P49736	P49736	1.28161	1.28161	1.60358e-31	249	P49736	MCM2	DNA replication licensing factor MCM2	MCM2_HUMAN	58	143.109	2.43109	cancer
cancer / NAT	Q99536	Q99536	Q99536	-1.70252	1.70252	2.05335e-31	213	Q99536	VAT1	Synaptic vesicle membrane protein VAT-1 homolog	VAT1_HUMAN	32	-69.2751	0.307249	cancer
cancer / NAT	P12110	P12110	P12110	-1.60958	1.60958	2.87061e-31	270	P12110	COL6A2	Collagen alpha-2(VI) chain	CO6A2_HUMAN	49	-67.2307	0.327693	cancer
cancer / NAT	P43652	P43652	P43652	-1.87917	1.87917	3.20747e-31	165	P43652	AFM	Afamin	AFAM_HUMAN	39	-72.8159	0.271841	cancer
cancer / NAT	A5YKK6	A5YKK6	A5YKK6	-0.067107	0.067107	5.0303e-31	474	A5YKK6	CNOT1	CCR4-NOT transcription complex subunit 1	CNOT1_HUMAN	111	-4.54498	0.95455	cancer
cancer / NAT	Q9BXR6	Q9BXR6	Q9BXR6	-3.27798	3.27798	5.22408e-31	108	Q9BXR6	CFHR5	Complement factor H-related protein 5	FHR5_HUMAN	26	-89.6907	0.103093	cancer
cancer / NAT	Q15417	Q15417	Q15417	-0.540174	0.540174	6.93746e-31	135	Q15417	CNN3	Calponin-3	CNN3_HUMAN	23	-31.2312	0.687688	cancer
cancer / NAT	Q13796	Q13796	Q13796	1.49206	1.49206	7.09916e-31	318	Q13796	SHROOM2	Protein Shroom2	SHRM2_HUMAN	96	181.29	2.8129	cancer
cancer / NAT	O95347	O95347	O95347	1.63668	1.63668	7.16374e-31	300	O95347	SMC2	Structural maintenance of chromosomes protein 2	SMC2_HUMAN	77	210.948	3.10948	cancer
cancer / NAT	P05156	P05156	P05156	-1.95898	1.95898	8.4471e-31	129	P05156	CFI	Complement factor I	CFAI_HUMAN	29	-74.279	0.25721	cancer
cancer / NAT	O95757	O95757	O95757	-3.11753	3.11753	1.20857e-30	162	O95757	HSPA4L	Heat shock 70 kDa protein 4L	HS74L_HUMAN	55	-88.478	0.11522	cancer
cancer / NAT	Q587J7	Q587J7	Q587J7	2.43937	2.43937	1.45732e-30	207	Q587J7	TDRD12	Putative ATP-dependent RNA helicase TDRD12	TDR12_HUMAN	58	442.405	5.42405	cancer
cancer / NAT	P11216	P11216	P11216	0.561829	0.561829	1.46621e-30	582	P11216	PYGB	Glycogen phosphorylase, brain form	PYGB_HUMAN	88	47.614	1.47614	cancer
cancer / NAT	O14980	O14980	O14980	0.462536	0.462536	1.57005e-30	417	O14980	XPO1	Exportin-1	XPO1_HUMAN	69	37.7962	1.37796	cancer
cancer / NAT	P02765	P02765	P02765	-1.933	1.933	1.83248e-30	99	P02765	AHSG	Alpha-2-HS-glycoprotein	FETUA_HUMAN	18	-73.8116	0.261884	cancer
cancer / NAT	P07357	P07357	P07357	-2.10222	2.10222	1.88773e-30	111	P07357	C8A	Complement component C8 alpha chain	CO8A_HUMAN	27	-76.71	0.2329	cancer
cancer / NAT	P22897	P22897	P22897	-1.17892	1.17892	2.30772e-30	201	P22897	MRC1	Macrophage mannose receptor 1	MRC1_HUMAN	69	-55.8317	0.441683	cancer
cancer / NAT	P33992	P33992	P33992	1.51427	1.51427	2.31395e-30	261	P33992	MCM5	DNA replication licensing factor MCM5	MCM5_HUMAN	65	185.654	2.85654	cancer
cancer / NAT	P33897	P33897	P33897	-2.79953	2.79953	2.31395e-30	105	P33897	ABCD1	ATP-binding cassette sub-family D member 1	ABCD1_HUMAN	36	-85.6366	0.143634	cancer
cancer / NAT	Q12874	Q12874	Q12874	0.930151	0.930151	2.34396e-30	174	Q12874	SF3A3	Splicing factor 3A subunit 3	SF3A3_HUMAN	35	90.5475	1.90547	cancer
cancer / NAT	P15311	P15311	P15311	-1.03556	1.03556	2.72446e-30	297	P15311	EZR	Ezrin	EZRI_HUMAN	46	-51.2173	0.487827	cancer
cancer / NAT	P60842	P60842	P60842	0.746833	0.746833	3.12937e-30	282	P60842	EIF4A1	Eukaryotic initiation factor 4A-I	IF4A1_HUMAN	36	67.8105	1.6781	cancer
cancer / NAT	P06748	P06748	P06748	1.13465	1.13465	3.63303e-30	261	P06748	NPM1	Nucleophosmin	NPM_HUMAN	42	119.566	2.19566	cancer
cancer / NAT	P51648;P51648-2	P51648;P51648-2	P51648	-2.72081	2.72081	3.99434e-30	129	P51648;P51648-2	ALDH3A2	Fatty aldehyde dehydrogenase;Isoform 2 of Fatty aldehyde dehydrogenase	AL3A2_HUMAN	29	-84.8311	0.151689	cancer
cancer / NAT	P11277	P11277	P11277	-1.08859	1.08859	4.1581e-30	324	P11277	SPTB	Spectrin beta chain, erythrocytic	SPTB1_HUMAN	89	-52.9778	0.470222	cancer
cancer / NAT	Q9NX02	Q9NX02	Q9NX02	1.88856	1.88856	4.18661e-30	282	Q9NX02	NLRP2	NACHT, LRR and PYD domains-containing protein 2	NALP2_HUMAN	66	270.265	3.70265	cancer
cancer / NAT	P50148	P50148	P50148	-1.55855	1.55855	4.43332e-30	105	P50148	GNAQ	Guanine nucleotide-binding protein G(q) subunit alpha	GNAQ_HUMAN	24	-66.0508	0.339492	cancer
cancer / NAT	Q5T7N2	Q5T7N2	Q5T7N2	-1.76767	1.76767	5.29424e-30	324	Q5T7N2	L1TD1	LINE-1 type transposase domain-containing protein 1	LITD1_HUMAN	76	-70.6316	0.293684	cancer
cancer / NAT	P02763	P02763	P02763	-1.96125	1.96125	5.8976e-30	96	P02763	ORM1	Alpha-1-acid glycoprotein 1	A1AG1_HUMAN	18	-74.3195	0.256805	cancer
cancer / NAT	P02751-3	P02751-3	P02751	0.526844	0.526844	6.12073e-30	645	P02751-3	FN1	Isoform 3 of Fibronectin	FINC_HUMAN	132	44.0774	1.44077	cancer
cancer / NAT	Q6ZU15	Q6ZU15	Q6ZU15	-3.95397	3.95397	6.16497e-30	159	Q6ZU15	2014-09-01	Septin-14	SEP14_HUMAN	34	-93.5474	0.0645265	cancer
cancer / NAT	P24752	P24752	P24752	-1.43872	1.43872	6.3187e-30	192	P24752	ACAT1	Acetyl-CoA acetyltransferase, mitochondrial	THIL_HUMAN	32	-63.1106	0.368894	cancer
cancer / NAT	P35222	P35222	P35222	-1.09488	1.09488	7.21477e-30	222	P35222	CTNNB1	Catenin beta-1	CTNB1_HUMAN	41	-53.1826	0.468174	cancer
cancer / NAT	P10909;P10909-2;P10909-4;P10909-5	P10909;P10909-2;P10909-4;P10909-5	P10909	-1.51984	1.51984	7.72902e-30	159	P10909;P10909-2;P10909-4;P10909-5	CLU	Clusterin;Isoform 2 of Clusterin;Isoform 4 of Clusterin;Isoform 5 of Clusterin	CLUS_HUMAN	27	-65.1275	0.348725	cancer
cancer / NAT	Q9NUB1;Q9NUB1-2	Q9NUB1;Q9NUB1-2	Q9NUB1	-2.58964	2.58964	7.91036e-30	153	Q9NUB1;Q9NUB1-2	ACSS1	Acetyl-coenzyme A synthetase 2-like, mitochondrial;Isoform 2 of Acetyl-coenzyme A synthetase 2-like, mitochondrial	ACS2L_HUMAN	33	-83.3873	0.166127	cancer
cancer / NAT	Q9Y606;Q9Y606-2	Q9Y606;Q9Y606-2	Q9Y606	1.55052	1.55052	8.83076e-30	159	Q9Y606;Q9Y606-2	PUS1	tRNA pseudouridine synthase A;Isoform 2 of tRNA pseudouridine synthase A	TRUA_HUMAN	35	192.923	2.92923	cancer
cancer / NAT	P08697	P08697	P08697	-2.238	2.238	9.93469e-30	132	P08697	SERPINF2	Alpha-2-antiplasmin	A2AP_HUMAN	25	-78.802	0.21198	cancer
cancer / NAT	O60264	O60264	O60264	1.08795	1.08795	1.03159e-29	261	O60264	SMARCA5	SWI/SNF-related matrix-associated actin-dependent regulator of chromatin subfamily A member 5	SMCA5_HUMAN	59	112.571	2.12571	cancer
cancer / NAT	P19827	P19827	P19827	-1.34611	1.34611	1.08754e-29	210	P19827	ITIH1	Inter-alpha-trypsin inhibitor heavy chain H1	ITIH1_HUMAN	43	-60.6648	0.393352	cancer
cancer / NAT	Q92673	Q92673	Q92673	-2.64585	2.64585	1.26971e-29	165	Q92673	SORL1	Sortilin-related receptor	SORL_HUMAN	67	-84.0221	0.159779	cancer
cancer / NAT	O95865	O95865	O95865	-1.71197	1.71197	1.33417e-29	108	O95865	DDAH2	N(G),N(G)-dimethylarginine dimethylaminohydrolase 2	DDAH2_HUMAN	21	-69.4757	0.305243	cancer
cancer / NAT	O94973-2	O94973-2	O94973	-0.894356	0.894356	1.73532e-29	273	O94973-2	AP2A2	Isoform 2 of AP-2 complex subunit alpha-2	AP2A2_HUMAN	55	-46.2013	0.537987	cancer
cancer / NAT	Q9Y5X1	Q9Y5X1	Q9Y5X1	-1.18329	1.18329	2.30983e-29	144	Q9Y5X1	SNX9	Sorting nexin-9	SNX9_HUMAN	34	-55.9652	0.440348	cancer
cancer / NAT	P30837	P30837	P30837	-1.97617	1.97617	2.3378e-29	135	P30837	ALDH1B1	Aldehyde dehydrogenase X, mitochondrial	AL1B1_HUMAN	28	-74.5837	0.254163	cancer
cancer / NAT	Q92625	Q92625	Q92625	-1.38685	1.38685	3.74061e-29	192	Q92625	ANKS1A	Ankyrin repeat and SAM domain-containing protein 1A	ANS1A_HUMAN	58	-61.7602	0.382398	cancer
cancer / NAT	P09488	P09488	P09488	-3.84788	3.84788	3.81393e-29	123	P09488	GSTM1	Glutathione S-transferase Mu 1	GSTM1_HUMAN	26	-93.055	0.0694501	cancer
cancer / NAT	P35250	P35250	P35250	1.32472	1.32472	4.69923e-29	90	P35250	RFC2	Replication factor C subunit 2	RFC2_HUMAN	24	150.484	2.50484	cancer
cancer / NAT	P48059-3	P48059-3	P48059	-1.52299	1.52299	4.95931e-29	204	P48059-3	LIMS1	Isoform 3 of LIM and senescent cell antigen-like-containing domain protein 1	LIMS1_HUMAN	33	-65.2037	0.347963	cancer
cancer / NAT	P17987	P17987	P17987	1.27581	1.27581	6.49322e-29	339	P17987	TCP1	T-complex protein 1 subunit alpha	TCPA_HUMAN	46	142.135	2.42135	cancer
cancer / NAT	P02042	P02042	P02042	-1.42927	1.42927	6.49574e-29	87	P02042	HBD	Hemoglobin subunit delta	HBD_HUMAN	15	-62.8681	0.371319	cancer
cancer / NAT	P42226	P42226	P42226	-1.32376	1.32376	8.08163e-29	84	P42226	STAT6	Signal transducer and activator of transcription 6	STAT6_HUMAN	28	-60.0506	0.399494	cancer
cancer / NAT	P31689	P31689	P31689	0.973282	0.973282	1.07072e-28	174	P31689	DNAJA1	DnaJ homolog subfamily A member 1	DNJA1_HUMAN	34	96.3302	1.9633	cancer
cancer / NAT	Q14966	Q14966	Q14966	1.53292	1.53292	1.24999e-28	387	Q14966	ZNF638	Zinc finger protein 638	ZN638_HUMAN	101	189.371	2.89371	cancer
cancer / NAT	P07358	P07358	P07358	-1.83917	1.83917	1.33248e-28	141	P07358	C8B	Complement component C8 beta chain	CO8B_HUMAN	34	-72.0517	0.279483	cancer
cancer / NAT	O75368	O75368	O75368	-1.37707	1.37707	1.36284e-28	93	O75368	SH3BGRL	SH3 domain-binding glutamic acid-rich-like protein	SH3L1_HUMAN	17	-61.5001	0.384999	cancer
cancer / NAT	Q99729-3	Q99729-3	Q99729	1.35023	1.35023	1.42281e-28	123	Q99729-3	HNRNPAB	Isoform 3 of Heterogeneous nuclear ribonucleoprotein A/B	ROAA_HUMAN	24	154.953	2.54953	cancer
cancer / NAT	P50135	P50135	P50135	-1.79063	1.79063	1.45412e-28	66	P50135	HNMT	Histamine N-methyltransferase	HNMT_HUMAN	18	-71.0955	0.289045	cancer
cancer / NAT	O60841	O60841	O60841	0.922134	0.922134	1.88195e-28	426	O60841	EIF5B	Eukaryotic translation initiation factor 5B	IF2P_HUMAN	94	89.4916	1.89492	cancer
cancer / NAT	Q86TX2	Q86TX2	Q86TX2	-1.95998	1.95998	1.94744e-28	132	Q86TX2	ACOT1	Acyl-coenzyme A thioesterase 1	ACOT1_HUMAN	29	-74.2967	0.257033	cancer
cancer / NAT	Q9UHL4	Q9UHL4	Q9UHL4	-1.31643	1.31643	2.03786e-28	78	Q9UHL4	DPP7	Dipeptidyl peptidase 2	DPP2_HUMAN	23	-59.8472	0.401528	cancer
cancer / NAT	P23634-2;P23634-3;P23634-4;P23634-5	P23634-2;P23634-3;P23634-4;P23634-5	P23634	-2.18282	2.18282	2.0736e-28	144	P23634-2;P23634-3;P23634-4;P23634-5	ATP2B4	Isoform XA of Plasma membrane calcium-transporting ATPase 4;Isoform ZA of Plasma membrane calcium-transporting ATPase 4;Isoform XK of Plasma membrane calcium-transporting ATPase 4;Isoform ZK of Plasma membrane calcium-transporting ATPase 4	AT2B4_HUMAN	43	-77.9755	0.220245	cancer
cancer / NAT	O76024	O76024	O76024	-2.5396	2.5396	2.13666e-28	132	O76024	WFS1	Wolframin	WFS1_HUMAN	37	-82.8009	0.171991	cancer
cancer / NAT	P04040	P04040	P04040	-1.1688	1.1688	2.19123e-28	216	P04040	CAT	Catalase	CATA_HUMAN	42	-55.5209	0.444791	cancer
cancer / NAT	O60282	O60282	O60282	-0.950176	0.950176	2.26289e-28	303	O60282	KIF5C	Kinesin heavy chain isoform 5C	KIF5C_HUMAN	83	-48.2431	0.517569	cancer
cancer / NAT	O75691	O75691	O75691	1.06256	1.06256	2.63173e-28	357	O75691	UTP20	Small subunit processome component 20 homolog	UTP20_HUMAN	117	108.864	2.08864	cancer
cancer / NAT	Q15019;Q15019-2	Q15019;Q15019-2	Q15019	-0.795978	0.795978	2.74352e-28	225	Q15019;Q15019-2	2002-09-01	Septin-2;Isoform 2 of Septin-2	SEPT2_HUMAN	31	-42.4047	0.575953	cancer
cancer / NAT	P00966	P00966	P00966	-2.28916	2.28916	2.98852e-28	147	P00966	ASS1	Argininosuccinate synthase	ASSY_HUMAN	29	-79.5405	0.204595	cancer
cancer / NAT	Q9Y520-4	Q9Y520-4	Q9Y520	0.852056	0.852056	3.00656e-28	453	Q9Y520-4	PRRC2C	Isoform 4 of Protein PRRC2C	PRC2C_HUMAN	124	80.5072	1.80507	cancer
cancer / NAT	Q63HR2;Q63HR2-4;Q63HR2-6	Q63HR2;Q63HR2-4;Q63HR2-6	Q63HR2	-1.37711	1.37711	3.4939e-28	177	Q63HR2;Q63HR2-4;Q63HR2-6	TNS2	Tensin-2;Isoform 4 of Tensin-2;Isoform 6 of Tensin-2	TNS2_HUMAN	62	-61.501	0.38499	cancer
cancer / NAT	Q9Y3L3	Q9Y3L3	Q9Y3L3	1.84319	1.84319	3.71361e-28	210	Q9Y3L3	SH3BP1	SH3 domain-binding protein 1	3BP1_HUMAN	49	258.802	3.58802	cancer
cancer / NAT	P16278;P16278-3	P16278;P16278-3	P16278	-1.16337	1.16337	3.73068e-28	102	P16278;P16278-3	GLB1	Beta-galactosidase;Isoform 3 of Beta-galactosidase	BGAL_HUMAN	21	-55.3532	0.446468	cancer
cancer / NAT	Q16762	Q16762	Q16762	-1.62171	1.62171	3.73068e-28	75	Q16762	TST	Thiosulfate sulfurtransferase	THTR_HUMAN	19	-67.505	0.32495	cancer
cancer / NAT	P16435	P16435	P16435	-1.39465	1.39465	3.76038e-28	234	P16435	POR	NADPH--cytochrome P450 reductase	NCPR_HUMAN	47	-61.9664	0.380336	cancer
cancer / NAT	Q9BY77	Q9BY77	Q9BY77	1.58194	1.58194	4.58112e-28	120	Q9BY77	POLDIP3	Polymerase delta-interacting protein 3	PDIP3_HUMAN	30	199.372	2.99372	cancer
cancer / NAT	P48643	P48643	P48643	1.12182	1.12182	4.9754e-28	405	P48643	CCT5	T-complex protein 1 subunit epsilon	TCPE_HUMAN	56	117.622	2.17622	cancer
cancer / NAT	Q9NXZ2	Q9NXZ2	Q9NXZ2	1.32145	1.32145	5.30892e-28	216	Q9NXZ2	DDX43	Probable ATP-dependent RNA helicase DDX43	DDX43_HUMAN	51	149.918	2.49918	cancer
cancer / NAT	Q6PCB7	Q6PCB7	Q6PCB7	-1.8572	1.8572	5.79489e-28	87	Q6PCB7	SLC27A1	Long-chain fatty acid transport protein 1	S27A1_HUMAN	31	-72.3989	0.276011	cancer
cancer / NAT	Q16643	Q16643	Q16643	1.46282	1.46282	6.49442e-28	222	Q16643	DBN1	Drebrin	DREB_HUMAN	45	175.647	2.75647	cancer
cancer / NAT	O60437	O60437	O60437	-0.524449	0.524449	6.6742e-28	231	O60437	PPL	Periplakin	PEPL_HUMAN	106	-30.4776	0.695224	cancer
cancer / NAT	P49792	P49792	P49792	0.588874	0.588874	6.98179e-28	603	P49792	RANBP2	E3 SUMO-protein ligase RanBP2	RBP2_HUMAN	152	50.4073	1.50407	cancer
cancer / NAT	Q9NR30	Q9NR30	Q9NR30	1.32467	1.32467	7.63473e-28	276	Q9NR30	DDX21	Nucleolar RNA helicase 2	DDX21_HUMAN	61	150.476	2.50476	cancer
cancer / NAT	Q15029;Q15029-2	Q15029;Q15029-2	Q15029	0.988715	0.988715	7.64026e-28	363	Q15029;Q15029-2	EFTUD2	116 kDa U5 small nuclear ribonucleoprotein component;Isoform 2 of 116 kDa U5 small nuclear ribonucleoprotein component	U5S1_HUMAN	67	98.4416	1.98442	cancer
cancer / NAT	Q9UNX4	Q9UNX4	Q9UNX4	1.45865	1.45865	8.05513e-28	219	Q9UNX4	WDR3	WD repeat-containing protein 3	WDR3_HUMAN	62	174.851	2.74851	cancer
cancer / NAT	Q9Y4B6	Q9Y4B6	Q9Y4B6	0.69044	0.69044	8.73387e-28	234	Q9Y4B6	DCAF1	DDB1- and CUL4-associated factor 1	DCAF1_HUMAN	68	61.3776	1.61378	cancer
cancer / NAT	Q08257	Q08257	Q08257	-0.870866	0.870866	9.13326e-28	114	Q08257	CRYZ	Quinone oxidoreductase	QOR_HUMAN	24	-45.3182	0.546818	cancer
cancer / NAT	Q13797	Q13797	Q13797	-3.4266	3.4266	9.71826e-28	138	Q13797	ITGA9	Integrin alpha-9	ITA9_HUMAN	40	-90.6998	0.0930018	cancer
cancer / NAT	P27338	P27338	P27338	-2.78261	2.78261	1.07864e-27	132	P27338	MAOB	Amine oxidase [flavin-containing] B	AOFB_HUMAN	28	-85.4672	0.145328	cancer
cancer / NAT	P26599	P26599	P26599	1.02094	1.02094	1.2185e-27	273	P26599	PTBP1	Polypyrimidine tract-binding protein 1	PTBP1_HUMAN	32	102.924	2.02924	cancer
cancer / NAT	O14773	O14773	O14773	-1.91779	1.91779	1.3019e-27	72	O14773	TPP1	Tripeptidyl-peptidase 1	TPP1_HUMAN	17	-73.5341	0.264659	cancer
cancer / NAT	Q8NI27	Q8NI27	Q8NI27	0.87534	0.87534	1.46099e-27	243	Q8NI27	THOC2	THO complex subunit 2	THOC2_HUMAN	69	83.4441	1.83444	cancer
cancer / NAT	P42285	P42285	P42285	1.15343	1.15343	1.46451e-27	318	P42285	MTREX	Exosome RNA helicase MTR4	MTREX_HUMAN	71	122.442	2.22442	cancer
cancer / NAT	Q16853	Q16853	Q16853	-2.26972	2.26972	1.47883e-27	117	Q16853	AOC3	Membrane primary amine oxidase	AOC3_HUMAN	27	-79.263	0.20737	cancer
cancer / NAT	P18858	P18858	P18858	1.90982	1.90982	1.48406e-27	222	P18858	LIG1	DNA ligase 1	DNLI1_HUMAN	60	275.763	3.75763	cancer
cancer / NAT	P26639	P26639	P26639	1.25647	1.25647	1.69514e-27	279	P26639	TARS	Threonine--tRNA ligase, cytoplasmic	SYTC_HUMAN	62	138.911	2.38911	cancer
cancer / NAT	Q9H307	Q9H307	Q9H307	1.27188	1.27188	2.25579e-27	210	Q9H307	PNN	Pinin	PININ_HUMAN	53	141.475	2.41475	cancer
cancer / NAT	Q9UKV3-5	Q9UKV3-5	Q9UKV3	1.22246	1.22246	2.6331e-27	351	Q9UKV3-5	ACIN1	Isoform 4 of Apoptotic chromatin condensation inducer in the nucleus	ACINU_HUMAN	76	133.345	2.33345	cancer
cancer / NAT	Q9H583	Q9H583	Q9H583	0.163495	0.163495	2.70574e-27	357	Q9H583	HEATR1	HEAT repeat-containing protein 1	HEAT1_HUMAN	106	11.9997	1.12	cancer
cancer / NAT	Q9Y2L1	Q9Y2L1	Q9Y2L1	1.38426	1.38426	2.76861e-27	234	Q9Y2L1	DIS3	Exosome complex exonuclease RRP44	RRP44_HUMAN	60	161.037	2.61037	cancer
cancer / NAT	P40227	P40227	P40227	1.25503	1.25503	3.25047e-27	240	P40227	CCT6A	T-complex protein 1 subunit zeta	TCPZ_HUMAN	41	138.672	2.38672	cancer
cancer / NAT	P55265-2	P55265-2	P55265	1.07729	1.07729	3.76521e-27	426	P55265-2	ADAR	Isoform 2 of Double-stranded RNA-specific adenosine deaminase	DSRAD_HUMAN	86	111.007	2.11007	cancer
cancer / NAT	P20774	P20774	P20774	-1.9761	1.9761	3.76521e-27	117	P20774	OGN	Mimecan	MIME_HUMAN	21	-74.5825	0.254175	cancer
cancer / NAT	P05546	P05546	P05546	-2.29599	2.29599	3.82217e-27	114	P05546	SERPIND1	Heparin cofactor 2	HEP2_HUMAN	29	-79.6371	0.203629	cancer
cancer / NAT	P04196	P04196	P04196	-2.63057	2.63057	4.78783e-27	171	P04196	HRG	Histidine-rich glycoprotein	HRG_HUMAN	28	-83.852	0.16148	cancer
cancer / NAT	Q9HDC9	Q9HDC9	Q9HDC9	-0.9205	0.9205	4.78783e-27	162	Q9HDC9	APMAP	Adipocyte plasma membrane-associated protein	APMAP_HUMAN	31	-47.1674	0.528326	cancer
cancer / NAT	O43301	O43301	O43301	0.316508	0.316508	5.68056e-27	165	O43301	HSPA12A	Heat shock 70 kDa protein 12A	HS12A_HUMAN	43	24.5313	1.24531	cancer
cancer / NAT	P09455-2;P09455-3	P09455-2;P09455-3	P09455	-3.23574	3.23574	6.24026e-27	114	P09455-2;P09455-3	RBP1	Isoform 2 of Retinol-binding protein 1;Isoform 3 of Retinol-binding protein 1	RET1_HUMAN	17	-89.3844	0.106156	cancer
cancer / NAT	Q14643-2;Q14643-4;Q14643-5;Q14643-7;Q14643-8	Q14643-2;Q14643-4;Q14643-5;Q14643-7;Q14643-8	Q14643	-1.72168	1.72168	6.5016e-27	321	Q14643-2;Q14643-4;Q14643-5;Q14643-7;Q14643-8	ITPR1	Isoform 2 of Inositol 1,4,5-trisphosphate receptor type 1;Isoform 4 of Inositol 1,4,5-trisphosphate receptor type 1;Isoform 5 of Inositol 1,4,5-trisphosphate receptor type 1;Isoform 7 of Inositol 1,4,5-trisphosphate receptor type 1;Isoform 8 of Inositol 1,4,5-trisphosphate receptor type 1	ITPR1_HUMAN	111	-69.6806	0.303194	cancer
cancer / NAT	P39059	P39059	P39059	-1.65022	1.65022	6.54573e-27	132	P39059	COL15A1	Collagen alpha-1(XV) chain	COFA1_HUMAN	25	-68.1409	0.318591	cancer
cancer / NAT	P04003	P04003	P04003	-2.23046	2.23046	8.8264e-27	177	P04003	C4BPA	C4b-binding protein alpha chain	C4BPA_HUMAN	42	-78.691	0.21309	cancer
cancer / NAT	P18754;P18754-2	P18754;P18754-2	P18754	1.20558	1.20558	9.13684e-27	105	P18754;P18754-2	RCC1	Regulator of chromosome condensation;Isoform 2 of Regulator of chromosome condensation	RCC1_HUMAN	22	130.63	2.3063	cancer
cancer / NAT	O75323	O75323	O75323	-0.966124	0.966124	9.14928e-27	123	O75323	NIPSNAP2	Protein NipSnap homolog 2	NIPS2_HUMAN	21	-48.8121	0.511879	cancer
cancer / NAT	Q8NEU8	Q8NEU8	Q8NEU8	-2.97204	2.97204	1.04337e-26	168	Q8NEU8	APPL2	DCC-interacting protein 13-beta	DP13B_HUMAN	48	-87.2554	0.127446	cancer
cancer / NAT	Q9BQS8;Q9BQS8-4	Q9BQS8;Q9BQS8-4	Q9BQS8	-0.59406	0.59406	1.10049e-26	156	Q9BQS8;Q9BQS8-4	FYCO1	FYVE and coiled-coil domain-containing protein 1;Isoform 4 of FYVE and coiled-coil domain-containing protein 1	FYCO1_HUMAN	67	-33.7524	0.662476	cancer
cancer / NAT	Q07065	Q07065	Q07065	-1.26163	1.26163	1.24129e-26	243	Q07065	CKAP4	Cytoskeleton-associated protein 4	CKAP4_HUMAN	44	-58.2928	0.417072	cancer
cancer / NAT	Q00796	Q00796	Q00796	-1.23787	1.23787	1.30843e-26	144	Q00796	SORD	Sorbitol dehydrogenase	DHSO_HUMAN	22	-57.6002	0.423998	cancer
cancer / NAT	P02748	P02748	P02748	-1.94212	1.94212	1.37919e-26	114	P02748	C9	Complement component C9	CO9_HUMAN	27	-73.9765	0.260235	cancer
cancer / NAT	Q9H0D6	Q9H0D6	Q9H0D6	1.20518	1.20518	1.50898e-26	309	Q9H0D6	XRN2	5'-3' exoribonuclease 2	XRN2_HUMAN	74	130.566	2.30566	cancer
cancer / NAT	Q01780	Q01780	Q01780	1.59018	1.59018	1.6543e-26	270	Q01780	EXOSC10	Exosome component 10	EXOSX_HUMAN	62	201.086	3.01086	cancer
cancer / NAT	Q8IZL8	Q8IZL8	Q8IZL8	0.862598	0.862598	1.71251e-26	183	Q8IZL8	PELP1	Proline-, glutamic acid- and leucine-rich protein 1	PELP1_HUMAN	39	81.831	1.81831	cancer
cancer / NAT	Q05209	Q05209	Q05209	1.64329	1.64329	1.8466e-26	267	Q05209	PTPN12	Tyrosine-protein phosphatase non-receptor type 12	PTN12_HUMAN	58	212.378	3.12378	cancer
cancer / NAT	P13804	P13804	P13804	-1.30838	1.30838	2.02204e-26	120	P13804	ETFA	Electron transfer flavoprotein subunit alpha, mitochondrial	ETFA_HUMAN	21	-59.6227	0.403773	cancer
cancer / NAT	P51888	P51888	P51888	-0.829	0.829	2.2403e-26	156	P51888	PRELP	Prolargin	PRELP_HUMAN	26	-43.7081	0.562919	cancer
cancer / NAT	P09651-2	P09651-2	P09651	1.45241	1.45241	2.2833e-26	288	P09651-2	HNRNPA1	Isoform A1-A of Heterogeneous nuclear ribonucleoprotein A1	ROA1_HUMAN	39	173.666	2.73666	cancer
cancer / NAT	O75915	O75915	O75915	-1.58471	1.58471	2.36271e-26	60	O75915	ARL6IP5	PRA1 family protein 3	PRAF3_HUMAN	8	-66.6608	0.333392	cancer
cancer / NAT	Q66K14;Q66K14-2	Q66K14;Q66K14-2	Q66K14	-1.22746	1.22746	2.67406e-26	186	Q66K14;Q66K14-2	TBC1D9B	TBC1 domain family member 9B;Isoform 2 of TBC1 domain family member 9B	TBC9B_HUMAN	47	-57.2933	0.427067	cancer
cancer / NAT	P55083;P55083-2	P55083;P55083-2	P55083	-3.38887	3.38887	2.68345e-26	51	P55083;P55083-2	MFAP4	Microfibril-associated glycoprotein 4;Isoform 2 of Microfibril-associated glycoprotein 4	MFAP4_HUMAN	10	-90.4534	0.0954657	cancer
cancer / NAT	P05787;P05787-2	P05787;P05787-2	P05787	-2.61412	2.61412	2.89789e-26	129	P05787;P05787-2	KRT8	Keratin, type II cytoskeletal 8;Isoform 2 of Keratin, type II cytoskeletal 8	K2C8_HUMAN	38	-83.6668	0.163332	cancer
cancer / NAT	O95861	O95861	O95861	-1.06221	1.06221	2.92244e-26	99	O95861	BPNT1	3'(2'),5'-bisphosphate nucleotidase 1	BPNT1_HUMAN	19	-52.1102	0.478898	cancer
cancer / NAT	Q16531	Q16531	Q16531	-0.503104	0.503104	3.34519e-26	429	Q16531	DDB1	DNA damage-binding protein 1	DDB1_HUMAN	76	-29.4413	0.705587	cancer
cancer / NAT	Q15063-3	Q15063-3	Q15063	1.11183	1.11183	4.51832e-26	285	Q15063-3	POSTN	Isoform 3 of Periostin	POSTN_HUMAN	56	116.12	2.1612	cancer
cancer / NAT	Q5JPH6	Q5JPH6	Q5JPH6	1.29376	1.29376	5.08393e-26	144	Q5JPH6	EARS2	Probable glutamate--tRNA ligase, mitochondrial	SYEM_HUMAN	33	145.166	2.45166	cancer
cancer / NAT	P40937	P40937	P40937	1.137	1.137	5.09232e-26	90	P40937	RFC5	Replication factor C subunit 5	RFC5_HUMAN	21	119.924	2.19924	cancer
cancer / NAT	O00425	O00425	O00425	1.98691	1.98691	5.31322e-26	141	O00425	IGF2BP3	Insulin-like growth factor 2 mRNA-binding protein 3	IF2B3_HUMAN	30	296.388	3.96388	cancer
cancer / NAT	Q9NZU5	Q9NZU5	Q9NZU5	-1.01973	1.01973	5.88732e-26	135	Q9NZU5	LMCD1	LIM and cysteine-rich domains protein 1	LMCD1_HUMAN	29	-50.6791	0.493209	cancer
cancer / NAT	Q9UBM7	Q9UBM7	Q9UBM7	-3.54356	3.54356	5.93289e-26	42	Q9UBM7	DHCR7	7-dehydrocholesterol reductase	DHCR7_HUMAN	11	-91.4241	0.0857593	cancer
cancer / NAT	P11217-2	P11217-2	P11217	0.0771812	0.0771812	6.4522e-26	177	P11217-2	PYGM	Isoform 2 of Glycogen phosphorylase, muscle form	PYGM_HUMAN	42	5.49548	1.05495	cancer
cancer / NAT	Q14839;Q14839-2	Q14839;Q14839-2	Q14839	0.757297	0.757297	7.94565e-26	435	Q14839;Q14839-2	CHD4	Chromodomain-helicase-DNA-binding protein 4;Isoform 2 of Chromodomain-helicase-DNA-binding protein 4	CHD4_HUMAN	110	69.0321	1.69032	cancer
cancer / NAT	P55060;P55060-3	P55060;P55060-3	P55060	1.02339	1.02339	8.73882e-26	399	P55060;P55060-3	CSE1L	Exportin-2;Isoform 3 of Exportin-2	XPO2_HUMAN	72	103.268	2.03268	cancer
cancer / NAT	P10644	P10644	P10644	-1.31726	1.31726	9.71805e-26	156	P10644	PRKAR1A	cAMP-dependent protein kinase type I-alpha regulatory subunit	KAP0_HUMAN	29	-59.8704	0.401296	cancer
cancer / NAT	Q9C0J8	Q9C0J8	Q9C0J8	1.50234	1.50234	9.86546e-26	276	Q9C0J8	WDR33	pre-mRNA 3' end processing protein WDR33	WDR33_HUMAN	66	183.302	2.83302	cancer
cancer / NAT	P26927	P26927	P26927	-1.8042	1.8042	1.31743e-25	90	P26927	MST1	Hepatocyte growth factor-like protein	HGFL_HUMAN	28	-71.3661	0.286339	cancer
cancer / NAT	P20231;Q15661	P20231;Q15661	P20231	-3.99718	3.99718	1.32147e-25	111	P20231;Q15661	TPSB2;TPSAB1	Tryptase beta-2;Tryptase alpha/beta-1	TRYB2_HUMAN;TRYB1_HUMAN	16	-93.7378	0.0626222	cancer
cancer / NAT	Q969X5;Q969X5-2	Q969X5;Q969X5-2	Q969X5	-1.88152	1.88152	1.38052e-25	66	Q969X5;Q969X5-2	ERGIC1	Endoplasmic reticulum-Golgi intermediate compartment protein 1;Isoform 2 of Endoplasmic reticulum-Golgi intermediate compartment protein 1	ERGI1_HUMAN	11	-72.8602	0.271398	cancer
cancer / NAT	P61604	P61604	P61604	1.86241	1.86241	1.41068e-25	78	P61604	HSPE1	10 kDa heat shock protein, mitochondrial	CH10_HUMAN	20	263.614	3.63614	cancer
cancer / NAT	Q9Y617	Q9Y617	Q9Y617	-1.3675	1.3675	1.435e-25	129	Q9Y617	PSAT1	Phosphoserine aminotransferase	SERC_HUMAN	26	-61.2438	0.387562	cancer
cancer / NAT	Q92597	Q92597	Q92597	-1.29008	1.29008	1.91017e-25	132	Q92597	NDRG1	Protein NDRG1	NDRG1_HUMAN	15	-59.1072	0.408928	cancer
cancer / NAT	Q12929	Q12929	Q12929	-1.68651	1.68651	2.30468e-25	90	Q12929	EPS8	Epidermal growth factor receptor kinase substrate 8	EPS8_HUMAN	36	-68.9322	0.310678	cancer
cancer / NAT	P16930	P16930	P16930	-2.58421	2.58421	3.0568e-25	111	P16930	FAH	Fumarylacetoacetase	FAAA_HUMAN	24	-83.3246	0.166754	cancer
cancer / NAT	Q15067-2	Q15067-2	Q15067	-1.89492	1.89492	3.11968e-25	168	Q15067-2	ACOX1	Isoform 2 of Peroxisomal acyl-coenzyme A oxidase 1	ACOX1_HUMAN	34	-73.1112	0.268888	cancer
cancer / NAT	Q9ULZ3	Q9ULZ3	Q9ULZ3	1.19626	1.19626	3.20824e-25	90	Q9ULZ3	PYCARD	Apoptosis-associated speck-like protein containing a CARD	ASC_HUMAN	18	129.145	2.29145	cancer
cancer / NAT	Q14019	Q14019	Q14019	1.05986	1.05986	3.27269e-25	99	Q14019	COTL1	Coactosin-like protein	COTL1_HUMAN	21	108.473	2.08473	cancer
cancer / NAT	P50991	P50991	P50991	1.0425	1.0425	3.36418e-25	318	P50991	CCT4	T-complex protein 1 subunit delta	TCPD_HUMAN	46	105.98	2.0598	cancer
cancer / NAT	Q8WX94-3	Q8WX94-3	Q8WX94	1.67345	1.67345	3.48555e-25	267	Q8WX94-3	NLRP7	Isoform 3 of NACHT, LRR and PYD domains-containing protein 7	NALP7_HUMAN	67	218.977	3.18977	cancer
cancer / NAT	P31323	P31323	P31323	-2.62296	2.62296	3.56123e-25	129	P31323	PRKAR2B	cAMP-dependent protein kinase type II-beta regulatory subunit	KAP3_HUMAN	24	-83.7666	0.162334	cancer
cancer / NAT	P46977	P46977	P46977	-0.794944	0.794944	4.20022e-25	117	P46977	STT3A	Dolichyl-diphosphooligosaccharide--protein glycosyltransferase subunit STT3A	STT3A_HUMAN	27	-42.3634	0.576366	cancer
cancer / NAT	O14558	O14558	O14558	-3.01257	3.01257	4.37476e-25	72	O14558	HSPB6	Heat shock protein beta-6	HSPB6_HUMAN	11	-87.6084	0.123916	cancer
cancer / NAT	O75116	O75116	O75116	-0.619487	0.619487	4.70682e-25	246	O75116	ROCK2	Rho-associated protein kinase 2	ROCK2_HUMAN	92	-34.9097	0.650903	cancer
cancer / NAT	P05166	P05166	P05166	-1.57788	1.57788	4.74417e-25	114	P05166	PCCB	Propionyl-CoA carboxylase beta chain, mitochondrial	PCCB_HUMAN	27	-66.5026	0.334974	cancer
cancer / NAT	P30086	P30086	P30086	-1.24949	1.24949	5.23188e-25	132	P30086	PEBP1	Phosphatidylethanolamine-binding protein 1	PEBP1_HUMAN	21	-57.9404	0.420596	cancer
cancer / NAT	Q9NRZ9	Q9NRZ9	Q9NRZ9	1.92094	1.92094	6.12887e-25	258	Q9NRZ9	HELLS	Lymphoid-specific helicase	HELLS_HUMAN	68	278.67	3.7867	cancer
cancer / NAT	P07195	P07195	P07195	0.765101	0.765101	6.58279e-25	240	P07195	LDHB	L-lactate dehydrogenase B chain	LDHB_HUMAN	28	69.9489	1.69949	cancer
cancer / NAT	Q14258	Q14258	Q14258	-1.40269	1.40269	6.85548e-25	240	Q14258	TRIM25	E3 ubiquitin/ISG15 ligase TRIM25	TRI25_HUMAN	48	-62.1776	0.378224	cancer
cancer / NAT	Q14498;Q14498-2	Q14498;Q14498-2	Q14498	1.01947	1.01947	8.05345e-25	147	Q14498;Q14498-2	RBM39	RNA-binding protein 39;Isoform 2 of RNA-binding protein 39	RBM39_HUMAN	28	102.718	2.02718	cancer
cancer / NAT	O00264	O00264	O00264	-3.27209	3.27209	8.0822e-25	105	O00264	PGRMC1	Membrane-associated progesterone receptor component 1	PGRC1_HUMAN	19	-89.6485	0.103515	cancer
cancer / NAT	P01876	P01876	P01876	-1.45632	1.45632	8.43837e-25	90	P01876	IGHA1	Immunoglobulin heavy constant alpha 1	IGHA1_HUMAN	14	-63.5578	0.364422	cancer
cancer / NAT	P11532;P11532-4	P11532;P11532-4	P11532	-0.36817	0.36817	9.10293e-25	282	P11532;P11532-4	DMD	Dystrophin;Isoform 3 of Dystrophin	DMD_HUMAN	110	-22.5235	0.774765	cancer
cancer / NAT	P28482	P28482	P28482	-0.556211	0.556211	9.85532e-25	126	P28482	MAPK1	Mitogen-activated protein kinase 1	MK01_HUMAN	23	-31.9914	0.680086	cancer
cancer / NAT	P07900;P07900-2	P07900;P07900-2	P07900	0.960228	0.960228	9.96878e-25	411	P07900;P07900-2	HSP90AA1	Heat shock protein HSP 90-alpha;Isoform 2 of Heat shock protein HSP 90-alpha	HS90A_HUMAN	59	94.5617	1.94562	cancer
cancer / NAT	Q9ULC4	Q9ULC4	Q9ULC4	0.939	0.939	1.0053e-24	96	Q9ULC4	MCTS1	Malignant T-cell-amplified sequence 1	MCTS1_HUMAN	13	91.7199	1.9172	cancer
cancer / NAT	P45954	P45954	P45954	-1.57545	1.57545	1.02689e-24	81	P45954	ACADSB	Short/branched chain specific acyl-CoA dehydrogenase, mitochondrial	ACDSB_HUMAN	25	-66.4461	0.335539	cancer
cancer / NAT	P20701;P20701-2	P20701;P20701-2	P20701	2.3329	2.3329	1.05221e-24	111	P20701;P20701-2	ITGAL	Integrin alpha-L;Isoform 2 of Integrin alpha-L	ITAL_HUMAN	36	403.816	5.03816	cancer
cancer / NAT	Q9UJS0;Q9UJS0-2	Q9UJS0;Q9UJS0-2	Q9UJS0	1.15792	1.15792	1.10981e-24	162	Q9UJS0;Q9UJS0-2	SLC25A13	Calcium-binding mitochondrial carrier protein Aralar2;Isoform 2 of Calcium-binding mitochondrial carrier protein Aralar2	CMC2_HUMAN	31	123.135	2.23135	cancer
cancer / NAT	O00411	O00411	O00411	1.03513	1.03513	1.12705e-24	171	O00411	POLRMT	DNA-directed RNA polymerase, mitochondrial	RPOM_HUMAN	58	104.93	2.0493	cancer
cancer / NAT	P28161	P28161	P28161	-3.65514	3.65514	1.21463e-24	90	P28161	GSTM2	Glutathione S-transferase Mu 2	GSTM2_HUMAN	17	-92.0623	0.0793767	cancer
cancer / NAT	Q15293	Q15293	Q15293	-1.97459	1.97459	1.2339e-24	138	Q15293	RCN1	Reticulocalbin-1	RCN1_HUMAN	29	-74.5557	0.254443	cancer
cancer / NAT	Q14978-2	Q14978-2	Q14978	1.98619	1.98619	1.24236e-24	261	Q14978-2	NOLC1	Isoform Beta of Nucleolar and coiled-body phosphoprotein 1	NOLC1_HUMAN	64	296.19	3.9619	cancer
cancer / NAT	Q9UKG1	Q9UKG1	Q9UKG1	-1.87119	1.87119	1.41488e-24	159	Q9UKG1	APPL1	DCC-interacting protein 13-alpha	DP13A_HUMAN	45	-72.6652	0.273348	cancer
cancer / NAT	O75995	O75995	O75995	1.15873	1.15873	1.49652e-24	63	O75995	SASH3	SAM and SH3 domain-containing protein 3	SASH3_HUMAN	16	123.261	2.23261	cancer
cancer / NAT	Q5VZ89-7	Q5VZ89-7	Q5VZ89	-1.46791	1.46791	1.53358e-24	261	Q5VZ89-7	DENND4C	Isoform 2 of DENN domain-containing protein 4C	DEN4C_HUMAN	95	-63.8495	0.361505	cancer
cancer / NAT	Q8TCU6	Q8TCU6	Q8TCU6	1.62905	1.62905	1.58455e-24	270	Q8TCU6	PREX1	Phosphatidylinositol 3,4,5-trisphosphate-dependent Rac exchanger 1 protein	PREX1_HUMAN	90	209.309	3.09309	cancer
cancer / NAT	P18583-5	P18583-5	P18583	1.30263	1.30263	1.58455e-24	390	P18583-5	SON	Isoform D of Protein SON	SON_HUMAN	88	146.678	2.46678	cancer
cancer / NAT	Q9NP81	Q9NP81	Q9NP81	1.73499	1.73499	1.62202e-24	159	Q9NP81	SARS2	Serine--tRNA ligase, mitochondrial	SYSM_HUMAN	35	232.878	3.32878	cancer
cancer / NAT	Q9NTJ3	Q9NTJ3	Q9NTJ3	1.6859	1.6859	1.65493e-24	333	Q9NTJ3	SMC4	Structural maintenance of chromosomes protein 4	SMC4_HUMAN	98	221.74	3.2174	cancer
cancer / NAT	Q9NQW7-3	Q9NQW7-3	Q9NQW7	-1.65901	1.65901	1.66793e-24	183	Q9NQW7-3	XPNPEP1	Isoform 3 of Xaa-Pro aminopeptidase 1	XPP1_HUMAN	51	-68.3344	0.316656	cancer
cancer / NAT	Q13557;Q13557-10;Q13557-11;Q13557-6;Q13557-8	Q13557;Q13557-10;Q13557-11;Q13557-6;Q13557-8	Q13557	-1.445	1.445	1.69707e-24	117	Q13557;Q13557-10;Q13557-11;Q13557-6;Q13557-8	CAMK2D	Calcium/calmodulin-dependent protein kinase type II subunit delta;Isoform Delta 10 of Calcium/calmodulin-dependent protein kinase type II subunit delta;Isoform Delta 11 of Calcium/calmodulin-dependent protein kinase type II subunit delta;Isoform Delta 9 of Calcium/calmodulin-dependent protein kinase type II subunit delta;Isoform Delta 6 of Calcium/calmodulin-dependent protein kinase type II subun…	KCC2D_HUMAN	20	-63.2707	0.367293	cancer
cancer / NAT	Q96I24	Q96I24	Q96I24	-1.00945	1.00945	1.96289e-24	111	Q96I24	FUBP3	Far upstream element-binding protein 3	FUBP3_HUMAN	33	-50.3265	0.496735	cancer
cancer / NAT	Q13428-4	Q13428-4	Q13428	1.24316	1.24316	2.16416e-24	354	Q13428-4	TCOF1	Isoform 4 of Treacle protein	TCOF_HUMAN	85	136.717	2.36717	cancer
cancer / NAT	O14756	O14756	O14756	-4.24739	4.24739	2.21555e-24	90	O14756	HSD17B6	17-beta-hydroxysteroid dehydrogenase type 6	H17B6_HUMAN	20	-94.7349	0.0526511	cancer
cancer / NAT	Q8IW45	Q8IW45	Q8IW45	-1.63181	1.63181	2.46627e-24	120	Q8IW45	NAXD	ATP-dependent (S)-NAD(P)H-hydrate dehydratase	NNRD_HUMAN	23	-67.7317	0.322683	cancer
cancer / NAT	Q8NFW8	Q8NFW8	Q8NFW8	-0.822953	0.822953	2.94981e-24	183	Q8NFW8	CMAS	N-acylneuraminate cytidylyltransferase	NEUA_HUMAN	33	-43.4716	0.565284	cancer
cancer / NAT	Q9UBE0	Q9UBE0	Q9UBE0	0.905412	0.905412	3.04893e-24	207	Q9UBE0	SAE1	SUMO-activating enzyme subunit 1	SAE1_HUMAN	35	87.308	1.87308	cancer
cancer / NAT	P13639	P13639	P13639	0.918364	0.918364	3.17606e-24	651	P13639	EEF2	Elongation factor 2	EF2_HUMAN	90	88.9971	1.88997	cancer
cancer / NAT	Q12789	Q12789	Q12789	1.07287	1.07287	3.18678e-24	411	Q12789	GTF3C1	General transcription factor 3C polypeptide 1	TF3C1_HUMAN	121	110.361	2.10361	cancer
cancer / NAT	Q15233	Q15233	Q15233	1.06454	1.06454	3.48542e-24	327	Q15233	NONO	Non-POU domain-containing octamer-binding protein	NONO_HUMAN	44	109.15	2.0915	cancer
cancer / NAT	Q15165;Q15165-1	Q15165;Q15165-1	Q15165	-2.18158	2.18158	4.29965e-24	105	Q15165;Q15165-1	PON2	Serum paraoxonase/arylesterase 2;Isoform 1 of Serum paraoxonase/arylesterase 2	PON2_HUMAN	15	-77.9566	0.220434	cancer
cancer / NAT	P26232-2;P26232-5	P26232-2;P26232-5	P26232	-0.798403	0.798403	4.33702e-24	195	P26232-2;P26232-5	CTNNA2	Isoform 2 of Catenin alpha-2;Isoform 5 of Catenin alpha-2	CTNA2_HUMAN	61	-42.5015	0.574985	cancer
cancer / NAT	Q9H6R4;Q9H6R4-4	Q9H6R4;Q9H6R4-4	Q9H6R4	1.81461	1.81461	4.37948e-24	231	Q9H6R4;Q9H6R4-4	NOL6	Nucleolar protein 6;Isoform 4 of Nucleolar protein 6	NOL6_HUMAN	48	251.764	3.51764	cancer
cancer / NAT	Q9Y5B9	Q9Y5B9	Q9Y5B9	1.00657	1.00657	4.94484e-24	450	Q9Y5B9	SUPT16H	FACT complex subunit SPT16	SP16H_HUMAN	88	100.914	2.00914	cancer
cancer / NAT	P28907	P28907	P28907	1.19387	1.19387	5.011e-24	108	P28907	CD38	ADP-ribosyl cyclase/cyclic ADP-ribose hydrolase 1	CD38_HUMAN	24	128.766	2.28766	cancer
cancer / NAT	Q5SSJ5	Q5SSJ5	Q5SSJ5	-1.88424	1.88424	5.17157e-24	201	Q5SSJ5	HP1BP3	Heterochromatin protein 1-binding protein 3	HP1B3_HUMAN	45	-72.9114	0.270886	cancer
cancer / NAT	P35858;P35858-2	P35858;P35858-2	P35858	-1.67387	1.67387	5.23961e-24	117	P35858;P35858-2	IGFALS	Insulin-like growth factor-binding protein complex acid labile subunit;Isoform 2 of Insulin-like growth factor-binding protein complex acid labile subunit	ALS_HUMAN	25	-68.6589	0.313411	cancer
cancer / NAT	O75717	O75717	O75717	1.74194	1.74194	5.63816e-24	354	O75717	WDHD1	WD repeat and HMG-box DNA-binding protein 1	WDHD1_HUMAN	80	234.485	3.34485	cancer
cancer / NAT	Q03701	Q03701	Q03701	1.69761	1.69761	6.67993e-24	243	Q03701	CEBPZ	CCAAT/enhancer-binding protein zeta	CEBPZ_HUMAN	63	224.364	3.24364	cancer
cancer / NAT	Q5T6F2	Q5T6F2	Q5T6F2	2.01863	2.01863	6.7372e-24	120	Q5T6F2	UBAP2	Ubiquitin-associated protein 2	UBAP2_HUMAN	34	305.199	4.05199	cancer
cancer / NAT	Q9BRK5;Q9BRK5-6	Q9BRK5;Q9BRK5-6	Q9BRK5	-1.31219	1.31219	6.80037e-24	72	Q9BRK5;Q9BRK5-6	SDF4	45 kDa calcium-binding protein;Isoform 6 of 45 kDa calcium-binding protein	CAB45_HUMAN	14	-59.7292	0.402708	cancer
cancer / NAT	O00267-2	O00267-2	O00267	0.964306	0.964306	6.85683e-24	276	O00267-2	SUPT5H	Isoform 2 of Transcription elongation factor SPT5	SPT5H_HUMAN	64	95.1125	1.95112	cancer
cancer / NAT	A1L0T0	A1L0T0	A1L0T0	-1.91094	1.91094	7.09256e-24	192	A1L0T0	ILVBL	Acetolactate synthase-like protein	ILVBL_HUMAN	37	-73.408	0.26592	cancer
cancer / NAT	P55084	P55084	P55084	-0.691604	0.691604	7.0957e-24	252	P55084	HADHB	Trifunctional enzyme subunit beta, mitochondrial	ECHB_HUMAN	38	-38.0835	0.619165	cancer
cancer / NAT	O15484	O15484	O15484	-1.98576	1.98576	7.99162e-24	174	O15484	CAPN5	Calpain-5	CAN5_HUMAN	45	-74.7521	0.252479	cancer
cancer / NAT	P50225	P50225	P50225	-1.66572	1.66572	9.07291e-24	114	P50225	SULT1A1	Sulfotransferase 1A1	ST1A1_HUMAN	23	-68.4813	0.315187	cancer
cancer / NAT	P07093-2;P07093-3	P07093-2;P07093-3	P07093	-2.37263	2.37263	9.30658e-24	81	P07093-2;P07093-3	SERPINE2	Isoform 2 of Glia-derived nexin;Isoform 3 of Glia-derived nexin	GDN_HUMAN	21	-80.6907	0.193093	cancer
cancer / NAT	P20702	P20702	P20702	-0.325134	0.325134	9.49657e-24	135	P20702	ITGAX	Integrin alpha-X	ITAX_HUMAN	42	-20.1776	0.798224	cancer
cancer / NAT	Q6ZMZ3-2	Q6ZMZ3-2	Q6ZMZ3	-2.85858	2.85858	9.49657e-24	150	Q6ZMZ3-2	SYNE3	Isoform 2 of Nesprin-3	SYNE3_HUMAN	61	-86.2126	0.137874	cancer
cancer / NAT	P02511	P02511	P02511	-2.54372	2.54372	1.02396e-23	78	P02511	CRYAB	Alpha-crystallin B chain	CRYAB_HUMAN	17	-82.85	0.1715	cancer
cancer / NAT	P17931	P17931	P17931	-1.31184	1.31184	1.20519e-23	81	P17931	LGALS3	Galectin-3	LEG3_HUMAN	14	-59.7193	0.402807	cancer
cancer / NAT	P49750	P49750	P49750	0.910016	0.910016	1.26923e-23	411	P49750	YLPM1	YLP motif-containing protein 1	YLPM1_HUMAN	107	87.9066	1.87907	cancer
cancer / NAT	Q15021	Q15021	Q15021	1.12834	1.12834	1.57842e-23	186	Q15021	NCAPD2	Condensin complex subunit 1	CND1_HUMAN	61	118.607	2.18607	cancer
cancer / NAT	Q16798	Q16798	Q16798	-1.79689	1.79689	1.73964e-23	129	Q16798	ME3	NADP-dependent malic enzyme, mitochondrial	MAON_HUMAN	35	-71.2205	0.287795	cancer
cancer / NAT	Q16850	Q16850	Q16850	-2.39915	2.39915	1.93669e-23	114	Q16850	CYP51A1	Lanosterol 14-alpha demethylase	CP51A_HUMAN	27	-81.0424	0.189576	cancer
cancer / NAT	A0AVT1	A0AVT1	A0AVT1	-1.01194	1.01194	2.06378e-23	249	A0AVT1	UBA6	Ubiquitin-like modifier-activating enzyme 6	UBA6_HUMAN	71	-50.4121	0.495879	cancer
cancer / NAT	Q9BUJ2;Q9BUJ2-2	Q9BUJ2;Q9BUJ2-2	Q9BUJ2	1.21964	1.21964	2.10936e-23	288	Q9BUJ2;Q9BUJ2-2	HNRNPUL1	Heterogeneous nuclear ribonucleoprotein U-like protein 1;Isoform 2 of Heterogeneous nuclear ribonucleoprotein U-like protein 1	HNRL1_HUMAN	51	132.889	2.32889	cancer
cancer / NAT	Q92979	Q92979	Q92979	1.35579	1.35579	2.14919e-23	96	Q92979	EMG1	Ribosomal RNA small subunit methyltransferase NEP1	NEP1_HUMAN	17	155.936	2.55936	cancer
cancer / NAT	Q92888;Q92888-3	Q92888;Q92888-3	Q92888	1.03966	1.03966	2.81529e-23	192	Q92888;Q92888-3	ARHGEF1	Rho guanine nucleotide exchange factor 1;Isoform 3 of Rho guanine nucleotide exchange factor 1	ARHG1_HUMAN	51	105.575	2.05575	cancer
cancer / NAT	P08123	P08123	P08123	-1.2274	1.2274	2.8455e-23	225	P08123	COL1A2	Collagen alpha-2(I) chain	CO1A2_HUMAN	56	-57.2914	0.427086	cancer
cancer / NAT	Q9Y4A5;Q9Y4A5-2	Q9Y4A5;Q9Y4A5-2	Q9Y4A5	1.05602	1.05602	3.13313e-23	444	Q9Y4A5;Q9Y4A5-2	TRRAP	Transformation/transcription domain-associated protein;Isoform 2 of Transformation/transcription domain-associated protein	TRRAP_HUMAN	185	107.919	2.07919	cancer
cancer / NAT	P63010;P63010-2	P63010;P63010-2	P63010	-1.03969	1.03969	3.17556e-23	222	P63010;P63010-2	AP2B1	AP-2 complex subunit beta;Isoform 2 of AP-2 complex subunit beta	AP2B1_HUMAN	41	-51.3569	0.486431	cancer
cancer / NAT	Q7L2E3-2	Q7L2E3-2	Q7L2E3	0.926703	0.926703	3.18711e-23	294	Q7L2E3-2	DHX30	Isoform 2 of Putative ATP-dependent RNA helicase DHX30	DHX30_HUMAN	86	90.0927	1.90093	cancer
cancer / NAT	Q14137	Q14137	Q14137	1.90458	1.90458	3.33833e-23	171	Q14137	BOP1	Ribosome biogenesis protein BOP1	BOP1_HUMAN	41	274.399	3.74399	cancer
cancer / NAT	P56182	P56182	P56182	1.18813	1.18813	3.61504e-23	108	P56182	RRP1	Ribosomal RNA processing protein 1 homolog A	RRP1_HUMAN	28	127.857	2.27857	cancer
cancer / NAT	Q15120;Q15120-2	Q15120;Q15120-2	Q15120	-1.73103	1.73103	3.84719e-23	75	Q15120;Q15120-2	PDK3	[Pyruvate dehydrogenase (acetyl-transferring)] kinase isozyme 3, mitochondrial;Isoform 2 of [Pyruvate dehydrogenase (acetyl-transferring)] kinase isozyme 3, mitochondrial	PDK3_HUMAN	20	-69.8764	0.301236	cancer
cancer / NAT	Q9P266	Q9P266	Q9P266	-0.895867	0.895867	4.28662e-23	231	Q9P266	JCAD	Junctional protein associated with coronary artery disease	JCAD_HUMAN	66	-46.2576	0.537424	cancer
cancer / NAT	O60934	O60934	O60934	0.827729	0.827729	4.29805e-23	147	O60934	NBN	Nibrin	NBN_HUMAN	51	77.4889	1.77489	cancer
cancer / NAT	Q96QK1	Q96QK1	Q96QK1	-0.722874	0.722874	4.3281e-23	258	Q96QK1	VPS35	Vacuolar protein sorting-associated protein 35	VPS35_HUMAN	61	-39.4111	0.605889	cancer
cancer / NAT	P09110	P09110	P09110	-1.3586	1.3586	4.36862e-23	120	P09110	ACAA1	3-ketoacyl-CoA thiolase, peroxisomal	THIK_HUMAN	24	-61.0041	0.389959	cancer
cancer / NAT	P15088	P15088	P15088	-4.56894	4.56894	4.5756e-23	105	P15088	CPA3	Mast cell carboxypeptidase A	CBPA3_HUMAN	17	-95.7868	0.042132	cancer
cancer / NAT	P08294	P08294	P08294	-1.90714	1.90714	4.78219e-23	63	P08294	SOD3	Extracellular superoxide dismutase [Cu-Zn]	SODE_HUMAN	10	-73.3379	0.266621	cancer
cancer / NAT	Q9BXP5;Q9BXP5-2;Q9BXP5-3;Q9BXP5-4	Q9BXP5;Q9BXP5-2;Q9BXP5-3;Q9BXP5-4	Q9BXP5	1.0877	1.0877	4.7868e-23	324	Q9BXP5;Q9BXP5-2;Q9BXP5-3;Q9BXP5-4	SRRT	Serrate RNA effector molecule homolog;Isoform 2 of Serrate RNA effector molecule homolog;Isoform 3 of Serrate RNA effector molecule homolog;Isoform 4 of Serrate RNA effector molecule homolog	SRRT_HUMAN	65	112.535	2.12535	cancer
cancer / NAT	P35580-2	P35580-2	P35580	0.257687	0.257687	5.27877e-23	864	P35580-2	MYH10	Isoform 2 of Myosin-10	MYH10_HUMAN	174	19.556	1.19556	cancer
cancer / NAT	O60504	O60504	O60504	-0.837794	0.837794	6.41532e-23	192	O60504	SORBS3	Vinexin	VINEX_HUMAN	47	-44.0502	0.559498	cancer
cancer / NAT	Q7Z3U7;Q7Z3U7-5;Q7Z3U7-6	Q7Z3U7;Q7Z3U7-5;Q7Z3U7-6	Q7Z3U7	-1.03434	1.03434	8.22774e-23	132	Q7Z3U7;Q7Z3U7-5;Q7Z3U7-6	MON2	Protein MON2 homolog;Isoform 5 of Protein MON2 homolog;Isoform 6 of Protein MON2 homolog	MON2_HUMAN	45	-51.1759	0.488241	cancer
cancer / NAT	Q2VIR3	Q2VIR3	Q2VIR3	0.840971	0.840971	8.65105e-23	138	Q2VIR3	EIF2S3L	Putative eukaryotic translation initiation factor 2 subunit 3-like protein	IF2GL_HUMAN	28	79.1256	1.79126	cancer
cancer / NAT	Q96F85	Q96F85	Q96F85	-2.00904	2.00904	8.66504e-23	39	Q96F85	CNRIP1	CB1 cannabinoid receptor-interacting protein 1	CNRP1_HUMAN	7	-75.1561	0.248439	cancer
cancer / NAT	P45381	P45381	P45381	-3.14844	3.14844	8.8119e-23	81	P45381	ASPA	Aspartoacylase	ACY2_HUMAN	19	-88.7222	0.112778	cancer
cancer / NAT	P54652	P54652	P54652	0.221863	0.221863	8.88489e-23	216	P54652	HSPA2	Heat shock-related 70 kDa protein 2	HSP72_HUMAN	42	16.6239	1.16624	cancer
cancer / NAT	Q53GQ0	Q53GQ0	Q53GQ0	-1.97163	1.97163	9.21376e-23	120	Q53GQ0	HSD17B12	Very-long-chain 3-oxoacyl-CoA reductase	DHB12_HUMAN	22	-74.5035	0.254965	cancer
cancer / NAT	O94906	O94906	O94906	1.24879	1.24879	9.89896e-23	297	O94906	PRPF6	Pre-mRNA-processing factor 6	PRP6_HUMAN	63	137.642	2.37642	cancer
cancer / NAT	P54868	P54868	P54868	-3.38921	3.38921	1.08605e-22	117	P54868	HMGCS2	Hydroxymethylglutaryl-CoA synthase, mitochondrial	HMCS2_HUMAN	33	-90.4557	0.0954433	cancer
cancer / NAT	P61978-2	P61978-2	P61978	0.745619	0.745619	1.10934e-22	255	P61978-2	HNRNPK	Isoform 2 of Heterogeneous nuclear ribonucleoprotein K	HNRPK_HUMAN	42	67.6694	1.67669	cancer
cancer / NAT	P00748	P00748	P00748	-1.72915	1.72915	1.10934e-22	132	P00748	F12	Coagulation factor XII	FA12_HUMAN	30	-69.8371	0.301629	cancer
cancer / NAT	Q9BUQ8	Q9BUQ8	Q9BUQ8	0.851402	0.851402	1.18833e-22	252	Q9BUQ8	DDX23	Probable ATP-dependent RNA helicase DDX23	DDX23_HUMAN	60	80.4253	1.80425	cancer
cancer / NAT	P51610-4	P51610-4	P51610	1.03998	1.03998	1.22193e-22	351	P51610-4	HCFC1	Isoform 4 of Host cell factor 1	HCFC1_HUMAN	78	105.62	2.0562	cancer
cancer / NAT	Q96N66	Q96N66	Q96N66	-2.68356	2.68356	1.23004e-22	72	Q96N66	MBOAT7	Lysophospholipid acyltransferase 7	MBOA7_HUMAN	14	-84.4343	0.155657	cancer
cancer / NAT	Q5VT52-3	Q5VT52-3	Q5VT52	1.09662	1.09662	1.25677e-22	204	Q5VT52-3	RPRD2	Isoform 3 of Regulation of nuclear pre-mRNA domain-containing protein 2	RPRD2_HUMAN	73	113.854	2.13854	cancer
cancer / NAT	P46976-2	P46976-2	P46976	-1.44114	1.44114	1.27966e-22	114	P46976-2	GYG1	Isoform GN-1 of Glycogenin-1	GLYG_HUMAN	22	-63.1724	0.368276	cancer
cancer / NAT	Q86WJ1	Q86WJ1	Q86WJ1	1.64195	1.64195	1.49494e-22	171	Q86WJ1	CHD1L	Chromodomain-helicase-DNA-binding protein 1-like	CHD1L_HUMAN	56	212.088	3.12088	cancer
cancer / NAT	P19388	P19388	P19388	0.869	0.869	1.52153e-22	66	P19388	POLR2E	DNA-directed RNA polymerases I, II, and III subunit RPABC1	RPAB1_HUMAN	14	82.6397	1.8264	cancer
cancer / NAT	P33241	P33241	P33241	1.40821	1.40821	1.83494e-22	147	P33241	LSP1	Lymphocyte-specific protein 1	LSP1_HUMAN	25	165.408	2.65408	cancer
cancer / NAT	P11717	P11717	P11717	-0.716288	0.716288	1.85915e-22	366	P11717	IGF2R	Cation-independent mannose-6-phosphate receptor	MPRI_HUMAN	112	-39.1339	0.608661	cancer
cancer / NAT	Q9NQT8	Q9NQT8	Q9NQT8	-0.868686	0.868686	1.94892e-22	240	Q9NQT8	KIF13B	Kinesin-like protein KIF13B	KI13B_HUMAN	81	-45.2355	0.547645	cancer
cancer / NAT	O00148	O00148	O00148	1.23171	1.23171	2.21893e-22	219	O00148	DDX39A	ATP-dependent RNA helicase DDX39A	DX39A_HUMAN	32	134.845	2.34845	cancer
cancer / NAT	Q9Y263	Q9Y263	Q9Y263	0.763964	0.763964	2.22646e-22	261	Q9Y263	PLAA	Phospholipase A-2-activating protein	PLAP_HUMAN	57	69.815	1.69815	cancer
cancer / NAT	P10253	P10253	P10253	-1.31739	1.31739	2.45126e-22	186	P10253	GAA	Lysosomal alpha-glucosidase	LYAG_HUMAN	35	-59.874	0.40126	cancer
cancer / NAT	Q96T58	Q96T58	Q96T58	1.3693	1.3693	2.45126e-22	363	Q96T58	SPEN	Msx2-interacting protein	MINT_HUMAN	146	158.346	2.58346	cancer
cancer / NAT	Q96EM0	Q96EM0	Q96EM0	-2.27662	2.27662	2.45871e-22	78	Q96EM0	L3HYPDH	Trans-3-hydroxy-L-proline dehydratase	T3HPD_HUMAN	17	-79.362	0.20638	cancer
cancer / NAT	Q8N8A6	Q8N8A6	Q8N8A6	1.35309	1.35309	2.88234e-22	93	Q8N8A6	DDX51	ATP-dependent RNA helicase DDX51	DDX51_HUMAN	31	155.459	2.55459	cancer
cancer / NAT	Q9BPU6	Q9BPU6	Q9BPU6	-0.978658	0.978658	2.92799e-22	168	Q9BPU6	DPYSL5	Dihydropyrimidinase-related protein 5	DPYL5_HUMAN	37	-49.2548	0.507452	cancer
cancer / NAT	Q9NYF8;Q9NYF8-2	Q9NYF8;Q9NYF8-2	Q9NYF8	1.34167	1.34167	3.10289e-22	345	Q9NYF8;Q9NYF8-2	BCLAF1	Bcl-2-associated transcription factor 1;Isoform 2 of Bcl-2-associated transcription factor 1	BCLF1_HUMAN	70	153.444	2.53444	cancer
cancer / NAT	P00533	P00533	P00533	-2.53688	2.53688	3.29677e-22	147	P00533	EGFR	Epidermal growth factor receptor	EGFR_HUMAN	51	-82.7685	0.172315	cancer
cancer / NAT	O95571	O95571	O95571	1.42452	1.42452	3.36758e-22	81	O95571	ETHE1	Persulfide dioxygenase ETHE1, mitochondrial	ETHE1_HUMAN	15	168.425	2.68425	cancer
cancer / NAT	Q16134	Q16134	Q16134	-1.74402	1.74402	3.36758e-22	132	Q16134	ETFDH	Electron transfer flavoprotein-ubiquinone oxidoreductase, mitochondrial	ETFD_HUMAN	32	-70.1463	0.298537	cancer
cancer / NAT	P35241	P35241	P35241	-0.499645	0.499645	3.3698e-22	363	P35241	RDX	Radixin	RADI_HUMAN	66	-29.2719	0.707281	cancer
cancer / NAT	Q8NBX0	Q8NBX0	Q8NBX0	-2.20724	2.20724	3.59482e-22	63	Q8NBX0	SCCPDH	Saccharopine dehydrogenase-like oxidoreductase	SCPDL_HUMAN	17	-78.3451	0.216549	cancer
cancer / NAT	O60716-3;O60716-5	O60716-3;O60716-5	O60716	0.0846987	0.0846987	3.64146e-22	297	O60716-3;O60716-5	CTNND1	Isoform 1AC of Catenin delta-1;Isoform 1A of Catenin delta-1	CTND1_HUMAN	62	6.04663	1.06047	cancer
cancer / NAT	P46926	P46926	P46926	-1.17289	1.17289	3.64146e-22	96	P46926	GNPDA1	Glucosamine-6-phosphate isomerase 1	GNPI1_HUMAN	12	-55.6467	0.443533	cancer
cancer / NAT	Q9H7D0	Q9H7D0	Q9H7D0	-1.60496	1.60496	3.64328e-22	189	Q9H7D0	DOCK5	Dedicator of cytokinesis protein 5	DOCK5_HUMAN	85	-67.1256	0.328744	cancer
cancer / NAT	Q5T0N5-3;Q5T0N5-4	Q5T0N5-3;Q5T0N5-4	Q5T0N5	2.10689	2.10689	3.6844e-22	171	Q5T0N5-3;Q5T0N5-4	FNBP1L	Isoform 3 of Formin-binding protein 1-like;Isoform 4 of Formin-binding protein 1-like	FBP1L_HUMAN	42	330.762	4.30762	cancer
cancer / NAT	Q6ZVM7	Q6ZVM7	Q6ZVM7	-2.61698	2.61698	3.87299e-22	108	Q6ZVM7	TOM1L2	TOM1-like protein 2	TM1L2_HUMAN	28	-83.6991	0.163009	cancer
cancer / NAT	P14384	P14384	P14384	-1.89919	1.89919	3.99718e-22	54	P14384	CPM	Carboxypeptidase M	CBPM_HUMAN	18	-73.1905	0.268095	cancer
cancer / NAT	Q13614	Q13614	Q13614	-1.12719	1.12719	4.03904e-22	66	Q13614	MTMR2	Myotubularin-related protein 2	MTMR2_HUMAN	27	-54.2192	0.457808	cancer
cancer / NAT	O60216	O60216	O60216	0.77795	0.77795	4.57685e-22	129	O60216	RAD21	Double-strand-break repair protein rad21 homolog	RAD21_HUMAN	39	71.4693	1.71469	cancer
cancer / NAT	Q9NVS9	Q9NVS9	Q9NVS9	-2.27571	2.27571	4.64181e-22	123	Q9NVS9	PNPO	Pyridoxine-5'-phosphate oxidase	PNPO_HUMAN	21	-79.3489	0.206511	cancer
cancer / NAT	Q15746;Q15746-2	Q15746;Q15746-2	Q15746	-1.15181	1.15181	5.02165e-22	297	Q15746;Q15746-2	MYLK	Myosin light chain kinase, smooth muscle;Isoform 2 of Myosin light chain kinase, smooth muscle	MYLK_HUMAN	66	-54.9939	0.450061	cancer
cancer / NAT	Q9Y230	Q9Y230	Q9Y230	0.729994	0.729994	5.07338e-22	225	Q9Y230	RUVBL2	RuvB-like 2	RUVB2_HUMAN	42	65.8633	1.65863	cancer
cancer / NAT	O75396	O75396	O75396	-0.935828	0.935828	5.50475e-22	90	O75396	SEC22B	Vesicle-trafficking protein SEC22b	SC22B_HUMAN	13	-47.7258	0.522742	cancer
cancer / NAT	Q6YN16	Q6YN16	Q6YN16	-2.01208	2.01208	5.63765e-22	156	Q6YN16	HSDL2	Hydroxysteroid dehydrogenase-like protein 2	HSDL2_HUMAN	42	-75.2085	0.247915	cancer
cancer / NAT	Q3LXA3	Q3LXA3	Q3LXA3	-1.6672	1.6672	5.75308e-22	162	Q3LXA3	TKFC	Triokinase/FMN cyclase	TKFC_HUMAN	32	-68.5137	0.314863	cancer
cancer / NAT	Q14683	Q14683	Q14683	-1.53147	1.53147	6.12649e-22	504	Q14683	SMC1A	Structural maintenance of chromosomes protein 1A	SMC1A_HUMAN	133	-65.4075	0.345925	cancer
cancer / NAT	Q92835;Q92835-2	Q92835;Q92835-2	Q92835	1.6152	1.6152	6.48547e-22	216	Q92835;Q92835-2	INPP5D	Phosphatidylinositol 3,4,5-trisphosphate 5-phosphatase 1;Isoform 2 of Phosphatidylinositol 3,4,5-trisphosphate 5-phosphatase 1	SHIP1_HUMAN	75	206.354	3.06354	cancer
cancer / NAT	Q7Z7G0	Q7Z7G0	Q7Z7G0	-1.79174	1.79174	6.60199e-22	129	Q7Z7G0	ABI3BP	Target of Nesh-SH3	TARSH_HUMAN	29	-71.1177	0.288823	cancer
cancer / NAT	Q99832	Q99832	Q99832	1.16258	1.16258	6.98081e-22	378	Q99832	CCT7	T-complex protein 1 subunit eta	TCPH_HUMAN	57	123.858	2.23858	cancer
cancer / NAT	P20810-2	P20810-2	P20810	-1.51497	1.51497	7.1626e-22	243	P20810-2	CAST	Isoform 2 of Calpastatin	ICAL_HUMAN	56	-65.0097	0.349903	cancer
cancer / NAT	P62826	P62826	P62826	0.673486	0.673486	7.1626e-22	132	P62826	RAN	GTP-binding nuclear protein Ran	RAN_HUMAN	21	59.4922	1.59492	cancer
cancer / NAT	Q93034	Q93034	Q93034	-1.46379	1.46379	7.32102e-22	156	Q93034	CUL5	Cullin-5	CUL5_HUMAN	59	-63.7461	0.362539	cancer
cancer / NAT	Q96RQ3	Q96RQ3	Q96RQ3	-1.1323	1.1323	8.76468e-22	108	Q96RQ3	MCCC1	Methylcrotonoyl-CoA carboxylase subunit alpha, mitochondrial	MCCA_HUMAN	33	-54.3813	0.456187	cancer
cancer / NAT	P30043	P30043	P30043	-1.07389	1.07389	9.57904e-22	114	P30043	BLVRB	Flavin reductase (NADPH)	BLVRB_HUMAN	16	-52.4964	0.475036	cancer
cancer / NAT	Q96ST2	Q96ST2	Q96ST2	1.19878	1.19878	1.14369e-21	189	Q96ST2	IWS1	Protein IWS1 homolog	IWS1_HUMAN	51	129.546	2.29546	cancer
cancer / NAT	Q7KZ85	Q7KZ85	Q7KZ85	0.513276	0.513276	1.17936e-21	333	Q7KZ85	SUPT6H	Transcription elongation factor SPT6	SPT6H_HUMAN	106	42.7287	1.42729	cancer
cancer / NAT	Q9P275	Q9P275	Q9P275	1.9457	1.9457	1.59084e-21	183	Q9P275	USP36	Ubiquitin carboxyl-terminal hydrolase 36	UBP36_HUMAN	62	285.224	3.85224	cancer
cancer / NAT	Q15847	Q15847	Q15847	-2.40543	2.40543	1.6042e-21	48	Q15847	ADIRF	Adipogenesis regulatory factor	ADIRF_HUMAN	7	-81.1247	0.188753	cancer
cancer / NAT	Q9NZI8	Q9NZI8	Q9NZI8	1.80333	1.80333	1.61116e-21	201	Q9NZI8	IGF2BP1	Insulin-like growth factor 2 mRNA-binding protein 1	IF2B1_HUMAN	37	249.025	3.49025	cancer
cancer / NAT	Q96ST3	Q96ST3	Q96ST3	1.03209	1.03209	1.70263e-21	282	Q96ST3	SIN3A	Paired amphipathic helix protein Sin3a	SIN3A_HUMAN	69	104.499	2.04499	cancer
cancer / NAT	Q9NZ08-2	Q9NZ08-2	Q9NZ08	-0.764326	0.764326	1.98036e-21	195	Q9NZ08-2	ERAP1	Isoform 2 of Endoplasmic reticulum aminopeptidase 1	ERAP1_HUMAN	49	-41.1272	0.588728	cancer
cancer / NAT	P31483-2	P31483-2	P31483	0.981342	0.981342	2.11631e-21	90	P31483-2	TIA1	Isoform Short of Nucleolysin TIA-1 isoform p40	TIA1_HUMAN	18	97.4301	1.9743	cancer
cancer / NAT	P22694-2	P22694-2	P22694	-1.8432	1.8432	2.73342e-21	159	P22694-2	PRKACB	Isoform 2 of cAMP-dependent protein kinase catalytic subunit beta	KAPCB_HUMAN	29	-72.1297	0.278703	cancer
cancer / NAT	Q9Y3T9	Q9Y3T9	Q9Y3T9	1.83223	1.83223	2.79494e-21	132	Q9Y3T9	NOC2L	Nucleolar complex protein 2 homolog	NOC2L_HUMAN	31	256.088	3.56088	cancer
cancer / NAT	Q01469	Q01469	Q01469	0.962227	0.962227	2.80371e-21	153	Q01469	FABP5	Fatty acid-binding protein 5	FABP5_HUMAN	21	94.8315	1.94832	cancer
cancer / NAT	Q92600	Q92600	Q92600	0.769347	0.769347	2.82665e-21	69	Q92600	CNOT9	CCR4-NOT transcription complex subunit 9	CNOT9_HUMAN	19	70.4499	1.7045	cancer
cancer / NAT	P04217-2	P04217-2	P04217	-1.90265	1.90265	2.87468e-21	93	P04217-2	A1BG	Isoform 2 of Alpha-1B-glycoprotein	A1BG_HUMAN	16	-73.2549	0.267451	cancer
cancer / NAT	P24468	P24468	P24468	-2.4397	2.4397	2.89573e-21	36	P24468	NR2F2	COUP transcription factor 2	COT2_HUMAN	12	-81.5677	0.184323	cancer
cancer / NAT	Q92614-2	Q92614-2	Q92614	-0.853329	0.853329	2.99276e-21	360	Q92614-2	MYO18A	Isoform 2 of Unconventional myosin-XVIIIa	MY18A_HUMAN	107	-44.6494	0.553506	cancer
cancer / NAT	Q709C8;Q709C8-3	Q709C8;Q709C8-3	Q709C8	-1.11743	1.11743	3.04604e-21	573	Q709C8;Q709C8-3	VPS13C	Vacuolar protein sorting-associated protein 13C;Isoform 3 of Vacuolar protein sorting-associated protein 13C	VP13C_HUMAN	179	-53.9084	0.460916	cancer
cancer / NAT	P09619	P09619	P09619	-2.46837	2.46837	3.06179e-21	108	P09619	PDGFRB	Platelet-derived growth factor receptor beta	PGFRB_HUMAN	29	-81.9305	0.180695	cancer
cancer / NAT	Q9BX66-3	Q9BX66-3	Q9BX66	-1.105	1.105	3.09588e-21	219	Q9BX66-3	SORBS1	Isoform 3 of Sorbin and SH3 domain-containing protein 1	SRBS1_HUMAN	55	-53.5098	0.464902	cancer
cancer / NAT	P31146	P31146	P31146	1.75261	1.75261	3.12677e-21	201	P31146	CORO1A	Coronin-1A	COR1A_HUMAN	38	236.968	3.36968	cancer
cancer / NAT	Q9H4G0-2	Q9H4G0-2	Q9H4G0	-0.86938	0.86938	3.19558e-21	117	Q9H4G0-2	EPB41L1	Isoform 2 of Band 4.1-like protein 1	E41L1_HUMAN	40	-45.2618	0.547382	cancer
cancer / NAT	P19971	P19971	P19971	1.3195	1.3195	3.50681e-21	150	P19971	TYMP	Thymidine phosphorylase	TYPH_HUMAN	31	149.58	2.4958	cancer
cancer / NAT	Q9H1E5	Q9H1E5	Q9H1E5	-2.43306	2.43306	3.74857e-21	48	Q9H1E5	TMX4	Thioredoxin-related transmembrane protein 4	TMX4_HUMAN	13	-81.4827	0.185173	cancer
cancer / NAT	Q00839	Q00839	Q00839	0.893602	0.893602	3.96908e-21	471	Q00839	HNRNPU	Heterogeneous nuclear ribonucleoprotein U	HNRPU_HUMAN	72	85.7809	1.85781	cancer
cancer / NAT	P15104	P15104	P15104	-2.47538	2.47538	4.0571e-21	96	P15104	GLUL	Glutamine synthetase	GLNA_HUMAN	24	-82.0181	0.179819	cancer
cancer / NAT	Q9H4L5-2	Q9H4L5-2	Q9H4L5	1.49249	1.49249	4.15079e-21	198	Q9H4L5-2	OSBPL3	Isoform 1b of Oxysterol-binding protein-related protein 3	OSBL3_HUMAN	50	181.375	2.81375	cancer
cancer / NAT	P13671	P13671	P13671	-1.89099	1.89099	4.28244e-21	168	P13671	C6	Complement component C6	CO6_HUMAN	47	-73.0378	0.269622	cancer
cancer / NAT	P29218;P29218-3	P29218;P29218-3	P29218	-0.755217	0.755217	4.58257e-21	108	P29218;P29218-3	IMPA1	Inositol monophosphatase 1;Isoform 3 of Inositol monophosphatase 1	IMPA1_HUMAN	18	-40.7543	0.592457	cancer
cancer / NAT	P23396	P23396	P23396	0.860563	0.860563	4.85648e-21	183	P23396	RPS3	40S ribosomal protein S3	RS3_HUMAN	28	81.5746	1.81575	cancer
cancer / NAT	B1AK53	B1AK53	B1AK53	-3.14482	3.14482	5.3121e-21	105	B1AK53	ESPN	Espin	ESPN_HUMAN	30	-88.6939	0.113061	cancer
cancer / NAT	Q969G5	Q969G5	Q969G5	-2.29684	2.29684	6.31318e-21	102	Q969G5	CAVIN3	Caveolae-associated protein 3	CAVN3_HUMAN	19	-79.6492	0.203508	cancer
cancer / NAT	O75131	O75131	O75131	-0.615324	0.615324	6.41106e-21	144	O75131	CPNE3	Copine-3	CPNE3_HUMAN	30	-34.7217	0.652783	cancer
cancer / NAT	Q9NZN4	Q9NZN4	Q9NZN4	-2.72219	2.72219	7.33569e-21	84	Q9NZN4	EHD2	EH domain-containing protein 2	EHD2_HUMAN	13	-84.8456	0.151544	cancer
cancer / NAT	P09871	P09871	P09871	-2.43974	2.43974	7.79083e-21	108	P09871	C1S	Complement C1s subcomponent	C1S_HUMAN	27	-81.5683	0.184317	cancer
cancer / NAT	Q8IUD2	Q8IUD2	Q8IUD2	0.948252	0.948252	7.86143e-21	375	Q8IUD2	ERC1	ELKS/Rab6-interacting/CAST family member 1	RB6I2_HUMAN	104	92.9533	1.92953	cancer
cancer / NAT	Q13435	Q13435	Q13435	1.05052	1.05052	8.39691e-21	354	Q13435	SF3B2	Splicing factor 3B subunit 2	SF3B2_HUMAN	65	107.128	2.07128	cancer
cancer / NAT	Q9Y666	Q9Y666	Q9Y666	-3.1139	3.1139	8.79976e-21	111	Q9Y666	SLC12A7	Solute carrier family 12 member 7	S12A7_HUMAN	32	-88.4489	0.115511	cancer
cancer / NAT	O43865	O43865	O43865	-1.03557	1.03557	9.39759e-21	93	O43865	AHCYL1	S-adenosylhomocysteine hydrolase-like protein 1	SAHH2_HUMAN	27	-51.2177	0.487823	cancer
cancer / NAT	Q9UKD2	Q9UKD2	Q9UKD2	1.66592	1.66592	9.50391e-21	93	Q9UKD2	MRTO4	mRNA turnover protein 4 homolog	MRT4_HUMAN	19	217.315	3.17315	cancer
cancer / NAT	P62263	P62263	P62263	0.882925	0.882925	1.01381e-20	108	P62263	RPS14	40S ribosomal protein S14	RS14_HUMAN	15	84.411	1.84411	cancer
cancer / NAT	P26368;P26368-2	P26368;P26368-2	P26368	0.842118	0.842118	1.04018e-20	177	P26368;P26368-2	U2AF2	Splicing factor U2AF 65 kDa subunit;Isoform 2 of Splicing factor U2AF 65 kDa subunit	U2AF2_HUMAN	26	79.268	1.79268	cancer
cancer / NAT	Q96K76-4	Q96K76-4	Q96K76	-1.0851	1.0851	1.15274e-20	189	Q96K76-4	USP47	Isoform 4 of Ubiquitin carboxyl-terminal hydrolase 47	UBP47_HUMAN	66	-52.8642	0.471358	cancer
cancer / NAT	O15050	O15050	O15050	0.966869	0.966869	1.1594e-20	291	O15050	TRANK1	TPR and ankyrin repeat-containing protein 1	TRNK1_HUMAN	122	95.4594	1.95459	cancer
cancer / NAT	P49419-2	P49419-2	P49419	-0.739162	0.739162	1.26834e-20	192	P49419-2	ALDH7A1	Isoform 2 of Alpha-aminoadipic semialdehyde dehydrogenase	AL7A1_HUMAN	33	-40.0913	0.599087	cancer
cancer / NAT	O15230	O15230	O15230	-1.12996	1.12996	1.49352e-20	456	O15230	LAMA5	Laminin subunit alpha-5	LAMA5_HUMAN	131	-54.3071	0.456929	cancer
cancer / NAT	P50479	P50479	P50479	-1.16427	1.16427	1.52186e-20	87	P50479	PDLIM4	PDZ and LIM domain protein 4	PDLI4_HUMAN	19	-55.381	0.44619	cancer
cancer / NAT	P23946	P23946	P23946	-4.38171	4.38171	1.55694e-20	81	P23946	CMA1	Chymase	CMA1_HUMAN	17	-95.203	0.0479705	cancer
cancer / NAT	Q08J23	Q08J23	Q08J23	1.00017	1.00017	1.55937e-20	273	Q08J23	NSUN2	tRNA (cytosine(34)-C(5))-methyltransferase	NSUN2_HUMAN	64	100.023	2.00023	cancer
cancer / NAT	Q9UN36-2;Q9UN36-6	Q9UN36-2;Q9UN36-6	Q9UN36	-2.37922	2.37922	1.69307e-20	87	Q9UN36-2;Q9UN36-6	NDRG2	Isoform 2 of Protein NDRG2;Isoform 6 of Protein NDRG2	NDRG2_HUMAN	17	-80.7787	0.192213	cancer
cancer / NAT	P42166	P42166	P42166	1.58129	1.58129	1.7179e-20	174	P42166	TMPO	Lamina-associated polypeptide 2, isoform alpha	LAP2A_HUMAN	31	199.237	2.99237	cancer
cancer / NAT	P08195;P08195-3;P08195-4	P08195;P08195-3;P08195-4	P08195	-1.13465	1.13465	1.8018e-20	153	P08195;P08195-3;P08195-4	SLC3A2	4F2 cell-surface antigen heavy chain;Isoform 3 of 4F2 cell-surface antigen heavy chain;Isoform 4 of 4F2 cell-surface antigen heavy chain	4F2_HUMAN	32	-54.4554	0.455446	cancer
cancer / NAT	P08571	P08571	P08571	-1.22508	1.22508	1.87057e-20	84	P08571	CD14	Monocyte differentiation antigen CD14	CD14_HUMAN	16	-57.2225	0.427775	cancer
cancer / NAT	P46087;P46087-4	P46087;P46087-4	P46087	1.25811	1.25811	1.89276e-20	165	P46087;P46087-4	NOP2	Probable 28S rRNA (cytosine(4447)-C(5))-methyltransferase;Isoform 4 of Probable 28S rRNA (cytosine(4447)-C(5))-methyltransferase	NOP2_HUMAN	44	139.183	2.39183	cancer
cancer / NAT	Q9UGT4	Q9UGT4	Q9UGT4	2.04046	2.04046	2.05883e-20	135	Q9UGT4	SUSD2	Sushi domain-containing protein 2	SUSD2_HUMAN	27	311.378	4.11378	cancer
cancer / NAT	P16157;P16157-10;P16157-12;P16157-14;P16157-16;P16157-3;P16157-5;P16157-8	P16157;P16157-10;P16157-12;P16157-14;P16157-16;P16157-3;P16157-5;P16157-8	P16157	-1.3426	1.3426	2.07873e-20	234	P16157;P16157-10;P16157-12;P16157-14;P16157-16;P16157-3;P16157-5;P16157-8	ANK1	Ankyrin-1;Isoform Er9 of Ankyrin-1;Isoform Er11 of Ankyrin-1;Isoform Er13 of Ankyrin-1;Isoform Er15 of Ankyrin-1;Isoform Er5 of Ankyrin-1;Isoform Er3 of Ankyrin-1;Isoform Er7 of Ankyrin-1	ANK1_HUMAN	70	-60.5692	0.394308	cancer
cancer / NAT	P06756;P06756-2;P06756-3	P06756;P06756-2;P06756-3	P06756	-1.11443	1.11443	2.10499e-20	147	P06756;P06756-2;P06756-3	ITGAV	Integrin alpha-V;Isoform 2 of Integrin alpha-V;Isoform 3 of Integrin alpha-V	ITAV_HUMAN	48	-53.8126	0.461874	cancer
cancer / NAT	Q9H2U2	Q9H2U2	Q9H2U2	-0.719013	0.719013	2.2232e-20	141	Q9H2U2	PPA2	Inorganic pyrophosphatase 2, mitochondrial	IPYR2_HUMAN	27	-39.2487	0.607513	cancer
cancer / NAT	Q96GQ7	Q96GQ7	Q96GQ7	1.3468	1.3468	2.53466e-20	171	Q96GQ7	DDX27	Probable ATP-dependent RNA helicase DDX27	DDX27_HUMAN	45	154.347	2.54347	cancer
cancer / NAT	Q6PI48	Q6PI48	Q6PI48	1.40519	1.40519	2.53466e-20	201	Q6PI48	DARS2	Aspartate--tRNA ligase, mitochondrial	SYDM_HUMAN	40	164.852	2.64852	cancer
cancer / NAT	P0DOX6	P0DOX6	P0DOX6	-1.0414	1.0414	2.59234e-20	135	P0DOX6	NaN	Immunoglobulin mu heavy chain	IGM_HUMAN	23	-51.4144	0.485856	cancer
cancer / NAT	O14920	O14920	O14920	-1.40095	1.40095	2.59448e-20	135	O14920	IKBKB	Inhibitor of nuclear factor kappa-B kinase subunit beta	IKKB_HUMAN	41	-62.1321	0.378679	cancer
cancer / NAT	P20042	P20042	P20042	1.21492	1.21492	2.60716e-20	156	P20042	EIF2S2	Eukaryotic translation initiation factor 2 subunit 2	IF2B_HUMAN	37	132.128	2.32128	cancer
cancer / NAT	Q9Y2H2	Q9Y2H2	Q9Y2H2	1.80403	1.80403	2.72397e-20	177	Q9Y2H2	INPP5F	Phosphatidylinositide phosphatase SAC2	SAC2_HUMAN	58	249.194	3.49194	cancer
cancer / NAT	O00625	O00625	O00625	-1.84409	1.84409	2.76164e-20	75	O00625	PIR	Pirin	PIR_HUMAN	19	-72.1469	0.278531	cancer
cancer / NAT	P62805	P62805	P62805	-1.29401	1.29401	2.81745e-20	150	P62805	HIST1H4A	Histone H4	H4_HUMAN	20	-59.2185	0.407815	cancer
cancer / NAT	P42892;P42892-2;P42892-3;P42892-4	P42892;P42892-2;P42892-3;P42892-4	P42892	-1.30915	1.30915	2.83327e-20	108	P42892;P42892-2;P42892-3;P42892-4	ECE1	Endothelin-converting enzyme 1;Isoform A of Endothelin-converting enzyme 1;Isoform C of Endothelin-converting enzyme 1;Isoform D of Endothelin-converting enzyme 1	ECE1_HUMAN	26	-59.6441	0.403559	cancer
cancer / NAT	Q9UKK3	Q9UKK3	Q9UKK3	-0.930766	0.930766	2.857e-20	192	Q9UKK3	PARP4	Poly [ADP-ribose] polymerase 4	PARP4_HUMAN	65	-47.542	0.52458	cancer
cancer / NAT	Q13459	Q13459	Q13459	-0.172334	0.172334	2.90467e-20	315	Q13459	MYO9B	Unconventional myosin-IXb	MYO9B_HUMAN	109	-11.2594	0.887406	cancer
cancer / NAT	Q9NP72	Q9NP72	Q9NP72	-1.34872	1.34872	3.06051e-20	72	Q9NP72	RAB18	Ras-related protein Rab-18	RAB18_HUMAN	18	-60.7361	0.392639	cancer
cancer / NAT	P54802	P54802	P54802	-1.71125	1.71125	3.11133e-20	99	P54802	NAGLU	Alpha-N-acetylglucosaminidase	ANAG_HUMAN	27	-69.4604	0.305396	cancer
cancer / NAT	P09382	P09382	P09382	-1.20992	1.20992	3.78053e-20	63	P09382	LGALS1	Galectin-1	LEG1_HUMAN	13	-56.7708	0.432292	cancer
cancer / NAT	Q16831	Q16831	Q16831	2.1067	2.1067	3.85324e-20	120	Q16831	UPP1	Uridine phosphorylase 1	UPP1_HUMAN	23	330.706	4.30706	cancer
cancer / NAT	P07225	P07225	P07225	-2.19435	2.19435	4.05165e-20	111	P07225	PROS1	Vitamin K-dependent protein S	PROS_HUMAN	26	-78.1509	0.218491	cancer
cancer / NAT	Q8WVB6	Q8WVB6	Q8WVB6	1.50214	1.50214	4.14566e-20	162	Q8WVB6	CHTF18	Chromosome transmission fidelity protein 18 homolog	CTF18_HUMAN	48	183.263	2.83263	cancer
cancer / NAT	P49441	P49441	P49441	-1.54985	1.54985	4.19905e-20	36	P49441	INPP1	Inositol polyphosphate 1-phosphatase	INPP_HUMAN	12	-65.8455	0.341545	cancer
cancer / NAT	P78559	P78559	P78559	-1.53169	1.53169	4.35964e-20	405	P78559	MAP1A	Microtubule-associated protein 1A	MAP1A_HUMAN	135	-65.4128	0.345872	cancer
cancer / NAT	Q13011	Q13011	Q13011	-1.29054	1.29054	4.60277e-20	156	Q13011	ECH1	Delta(3,5)-Delta(2,4)-dienoyl-CoA isomerase, mitochondrial	ECH1_HUMAN	24	-59.1202	0.408798	cancer
cancer / NAT	Q7Z3D6-2	Q7Z3D6-2	Q7Z3D6	-1.41533	1.41533	4.60878e-20	168	Q7Z3D6-2	DGLUCY	Isoform 2 of D-glutamate cyclase, mitochondrial	GLUCM_HUMAN	36	-62.5076	0.374924	cancer
cancer / NAT	Q9Y5P4;Q9Y5P4-3	Q9Y5P4;Q9Y5P4-3	Q9Y5P4	1.3729	1.3729	5.23592e-20	210	Q9Y5P4;Q9Y5P4-3	COL4A3BP	Collagen type IV alpha-3-binding protein;Isoform 3 of Collagen type IV alpha-3-binding protein	C43BP_HUMAN	47	158.991	2.58991	cancer
cancer / NAT	P05026;P05026-2	P05026;P05026-2	P05026	-1.77378	1.77378	5.2931e-20	105	P05026;P05026-2	ATP1B1	Sodium/potassium-transporting ATPase subunit beta-1;Isoform 2 of Sodium/potassium-transporting ATPase subunit beta-1	AT1B1_HUMAN	21	-70.7559	0.292441	cancer
cancer / NAT	P05165;P05165-2	P05165;P05165-2	P05165	-1.73681	1.73681	5.41642e-20	147	P05165;P05165-2	PCCA	Propionyl-CoA carboxylase alpha chain, mitochondrial;Isoform 2 of Propionyl-CoA carboxylase alpha chain, mitochondrial	PCCA_HUMAN	33	-69.9967	0.300033	cancer
cancer / NAT	P23193	P23193	P23193	1.94235	1.94235	5.55284e-20	177	P23193	TCEA1	Transcription elongation factor A protein 1	TCEA1_HUMAN	36	284.33	3.8433	cancer
cancer / NAT	Q5SW79-2	Q5SW79-2	Q5SW79	1.22629	1.22629	5.64055e-20	285	Q5SW79-2	CEP170	Isoform 2 of Centrosomal protein of 170 kDa	CE170_HUMAN	92	133.964	2.33964	cancer
cancer / NAT	Q6DD88	Q6DD88	Q6DD88	-1.3825	1.3825	5.74502e-20	171	Q6DD88	ATL3	Atlastin-3	ATLA3_HUMAN	34	-61.6445	0.383555	cancer
cancer / NAT	P05090	P05090	P05090	-1.89855	1.89855	6.20289e-20	42	P05090	APOD	Apolipoprotein D	APOD_HUMAN	11	-73.1787	0.268213	cancer
cancer / NAT	O43795-2	O43795-2	O43795	0.881934	0.881934	6.33955e-20	243	O43795-2	MYO1B	Isoform 2 of Unconventional myosin-Ib	MYO1B_HUMAN	60	84.2844	1.84284	cancer
cancer / NAT	Q9UJ70;Q9UJ70-2	Q9UJ70;Q9UJ70-2	Q9UJ70	1.00646	1.00646	6.37368e-20	123	Q9UJ70;Q9UJ70-2	NAGK	N-acetyl-D-glucosamine kinase;Isoform 2 of N-acetyl-D-glucosamine kinase	NAGK_HUMAN	21	100.898	2.00898	cancer
cancer / NAT	Q96RL7-2	Q96RL7-2	Q96RL7	0.553076	0.553076	6.49075e-20	273	Q96RL7-2	VPS13A	Isoform 2 of Vacuolar protein sorting-associated protein 13A	VP13A_HUMAN	112	46.7211	1.46721	cancer
cancer / NAT	Q969E4	Q969E4	Q969E4	-3.58522	3.58522	6.70748e-20	81	Q969E4	TCEAL3	Transcription elongation factor A protein-like 3	TCAL3_HUMAN	15	-91.6681	0.0833187	cancer
cancer / NAT	O15347	O15347	O15347	1.64919	1.64919	6.99851e-20	135	O15347	HMGB3	High mobility group protein B3	HMGB3_HUMAN	24	213.657	3.13657	cancer
cancer / NAT	Q9BRX8;Q9BRX8-2	Q9BRX8;Q9BRX8-2	Q9BRX8	-1.67034	1.67034	7.32839e-20	114	Q9BRX8;Q9BRX8-2	FAM213A	Redox-regulatory protein FAM213A;Isoform 2 of Redox-regulatory protein FAM213A	F213A_HUMAN	18	-68.582	0.31418	cancer
cancer / NAT	Q9P0L0-2	Q9P0L0-2	Q9P0L0	-1.61353	1.61353	7.57938e-20	129	Q9P0L0-2	VAPA	Isoform 2 of Vesicle-associated membrane protein-associated protein A	VAPA_HUMAN	24	-67.3203	0.326797	cancer
cancer / NAT	P02452	P02452	P02452	-1.22716	1.22716	7.89811e-20	249	P02452	COL1A1	Collagen alpha-1(I) chain	CO1A1_HUMAN	60	-57.2843	0.427157	cancer
cancer / NAT	Q8TD19	Q8TD19	Q8TD19	-0.509383	0.509383	7.89811e-20	222	Q8TD19	NEK9	Serine/threonine-protein kinase Nek9	NEK9_HUMAN	48	-29.7477	0.702523	cancer
cancer / NAT	P60903	P60903	P60903	-2.18941	2.18941	8.18367e-20	111	P60903	S100A10	Protein S100-A10	S10AA_HUMAN	10	-78.0759	0.219241	cancer
cancer / NAT	Q9Y2X3	Q9Y2X3	Q9Y2X3	1.15931	1.15931	8.34109e-20	267	Q9Y2X3	NOP58	Nucleolar protein 58	NOP58_HUMAN	41	123.35	2.2335	cancer
cancer / NAT	Q7LBC6	Q7LBC6	Q7LBC6	1.05196	1.05196	8.77313e-20	375	Q7LBC6	KDM3B	Lysine-specific demethylase 3B	KDM3B_HUMAN	98	107.335	2.07335	cancer
cancer / NAT	Q6NUM9	Q6NUM9	Q6NUM9	-1.63105	1.63105	9.55159e-20	105	Q6NUM9	RETSAT	All-trans-retinol 13,14-reductase	RETST_HUMAN	27	-67.7148	0.322852	cancer
cancer / NAT	Q96CX2	Q96CX2	Q96CX2	-1.82116	1.82116	9.76086e-20	117	Q96CX2	KCTD12	BTB/POZ domain-containing protein KCTD12	KCD12_HUMAN	24	-71.7007	0.282993	cancer
cancer / NAT	O60826	O60826	O60826	-0.648074	0.648074	1.03742e-19	132	O60826	CCDC22	Coiled-coil domain-containing protein 22	CCD22_HUMAN	32	-36.1868	0.638132	cancer
cancer / NAT	O60306	O60306	O60306	1.07151	1.07151	1.06766e-19	276	O60306	AQR	RNA helicase aquarius	AQR_HUMAN	78	110.163	2.10163	cancer
cancer / NAT	P07686	P07686	P07686	-0.844958	0.844958	1.09924e-19	138	P07686	HEXB	Beta-hexosaminidase subunit beta	HEXB_HUMAN	28	-44.3273	0.556727	cancer
cancer / NAT	Q99424	Q99424	Q99424	-3.03818	3.03818	1.11011e-19	111	Q99424	ACOX2	Peroxisomal acyl-coenzyme A oxidase 2	ACOX2_HUMAN	38	-87.8264	0.121736	cancer
cancer / NAT	P55263	P55263	P55263	-1.30763	1.30763	1.13515e-19	159	P55263	ADK	Adenosine kinase	ADK_HUMAN	29	-59.6017	0.403983	cancer
cancer / NAT	Q9H0S4	Q9H0S4	Q9H0S4	1.49145	1.49145	1.22588e-19	108	Q9H0S4	DDX47	Probable ATP-dependent RNA helicase DDX47	DDX47_HUMAN	24	181.171	2.81171	cancer
cancer / NAT	P06737;P06737-2	P06737;P06737-2	P06737	0.382405	0.382405	1.27177e-19	294	P06737;P06737-2	PYGL	Glycogen phosphorylase, liver form;Isoform 2 of Glycogen phosphorylase, liver form	PYGL_HUMAN	57	30.3513	1.30351	cancer
cancer / NAT	P82970	P82970	P82970	-3.7712	3.7712	1.28155e-19	90	P82970	HMGN5	High mobility group nucleosome-binding domain-containing protein 5	HMGN5_HUMAN	25	-92.6759	0.0732412	cancer
cancer / NAT	P52597	P52597	P52597	1.32037	1.32037	1.33939e-19	159	P52597	HNRNPF	Heterogeneous nuclear ribonucleoprotein F	HNRPF_HUMAN	26	149.73	2.4973	cancer
cancer / NAT	Q04446	Q04446	Q04446	-1.04707	1.04707	1.3691e-19	201	Q04446	GBE1	1,4-alpha-glucan-branching enzyme	GLGB_HUMAN	41	-51.6049	0.483951	cancer
cancer / NAT	Q8NBS9	Q8NBS9	Q8NBS9	-0.562843	0.562843	1.37349e-19	183	Q8NBS9	TXNDC5	Thioredoxin domain-containing protein 5	TXND5_HUMAN	31	-32.3033	0.676967	cancer
cancer / NAT	P49448	P49448	P49448	-3.61919	3.61919	1.40947e-19	90	P49448	GLUD2	Glutamate dehydrogenase 2, mitochondrial	DHE4_HUMAN	13	-91.862	0.0813796	cancer
cancer / NAT	P54886-2	P54886-2	P54886	1.21716	1.21716	1.45688e-19	240	P54886-2	ALDH18A1	Isoform Short of Delta-1-pyrroline-5-carboxylate synthase	P5CS_HUMAN	52	132.489	2.32489	cancer
cancer / NAT	P02786	P02786	P02786	1.22062	1.22062	1.61756e-19	153	P02786	TFRC	Transferrin receptor protein 1	TFR1_HUMAN	39	133.047	2.33047	cancer
cancer / NAT	Q14149	Q14149	Q14149	1.47042	1.47042	1.77783e-19	168	Q14149	MORC3	MORC family CW-type zinc finger protein 3	MORC3_HUMAN	60	177.102	2.77102	cancer
cancer / NAT	Q9H3Q1	Q9H3Q1	Q9H3Q1	0.709279	0.709279	1.80337e-19	87	Q9H3Q1	CDC42EP4	Cdc42 effector protein 4	BORG4_HUMAN	22	63.4986	1.63499	cancer
cancer / NAT	Q9Y6D6	Q9Y6D6	Q9Y6D6	0.323894	0.323894	1.84205e-19	390	Q9Y6D6	ARFGEF1	Brefeldin A-inhibited guanine nucleotide-exchange protein 1	BIG1_HUMAN	103	25.1704	1.2517	cancer
cancer / NAT	Q92974;Q92974-2;Q92974-3	Q92974;Q92974-2;Q92974-3	Q92974	1.67594	1.67594	1.90584e-19	195	Q92974;Q92974-2;Q92974-3	ARHGEF2	Rho guanine nucleotide exchange factor 2;Isoform 2 of Rho guanine nucleotide exchange factor 2;Isoform 3 of Rho guanine nucleotide exchange factor 2	ARHG2_HUMAN	63	219.527	3.19527	cancer
cancer / NAT	P00367	P00367	P00367	-0.275609	0.275609	1.93196e-19	276	P00367	GLUD1	Glutamate dehydrogenase 1, mitochondrial	DHE3_HUMAN	41	-17.3898	0.826102	cancer
cancer / NAT	Q08209;Q08209-2	Q08209;Q08209-2	Q08209	-1.5967	1.5967	2.04093e-19	69	Q08209;Q08209-2	PPP3CA	Serine/threonine-protein phosphatase 2B catalytic subunit alpha isoform;Isoform 2 of Serine/threonine-protein phosphatase 2B catalytic subunit alpha isoform	PP2BA_HUMAN	18	-66.9369	0.330631	cancer
cancer / NAT	Q6IAN0	Q6IAN0	Q6IAN0	-1.59734	1.59734	2.05045e-19	63	Q6IAN0	DHRS7B	Dehydrogenase/reductase SDR family member 7B	DRS7B_HUMAN	15	-66.9514	0.330486	cancer
cancer / NAT	Q8WUF5	Q8WUF5	Q8WUF5	0.799739	0.799739	2.19737e-19	87	Q8WUF5	PPP1R13L	RelA-associated inhibitor	IASPP_HUMAN	34	74.0786	1.74079	cancer
cancer / NAT	Q8NFF5;Q8NFF5-2	Q8NFF5;Q8NFF5-2	Q8NFF5	1.61908	1.61908	2.23577e-19	153	Q8NFF5;Q8NFF5-2	FLAD1	FAD synthase;Isoform 2 of FAD synthase	FAD1_HUMAN	36	207.18	3.0718	cancer
cancer / NAT	P21912	P21912	P21912	-0.724917	0.724917	2.51483e-19	99	P21912	SDHB	Succinate dehydrogenase [ubiquinone] iron-sulfur subunit, mitochondrial	SDHB_HUMAN	19	-39.4968	0.605032	cancer
cancer / NAT	Q9BWM7	Q9BWM7	Q9BWM7	-2.18547	2.18547	2.54811e-19	84	Q9BWM7	SFXN3	Sideroflexin-3	SFXN3_HUMAN	20	-78.0159	0.219841	cancer
cancer / NAT	Q5T5X7	Q5T5X7	Q5T5X7	1.91553	1.91553	2.67632e-19	168	Q5T5X7	BEND3	BEN domain-containing protein 3	BEND3_HUMAN	57	277.252	3.77252	cancer
cancer / NAT	Q96T76;Q96T76-8	Q96T76;Q96T76-8	Q96T76	0.749603	0.749603	2.67632e-19	246	Q96T76;Q96T76-8	MMS19	MMS19 nucleotide excision repair protein homolog;Isoform 5 of MMS19 nucleotide excision repair protein homolog	MMS19_HUMAN	53	68.1331	1.68133	cancer
cancer / NAT	Q96RP9	Q96RP9	Q96RP9	0.587564	0.587564	2.70058e-19	156	Q96RP9	GFM1	Elongation factor G, mitochondrial	EFGM_HUMAN	41	50.2707	1.50271	cancer
cancer / NAT	P33981;P33981-2	P33981;P33981-2	P33981	1.4652	1.4652	2.82959e-19	72	P33981;P33981-2	TTK	Dual specificity protein kinase TTK;Isoform 2 of Dual specificity protein kinase TTK	TTK_HUMAN	34	176.101	2.76101	cancer
cancer / NAT	Q06136	Q06136	Q06136	-2.2375	2.2375	2.93129e-19	36	Q06136	KDSR	3-ketodihydrosphingosine reductase	KDSR_HUMAN	11	-78.7946	0.212054	cancer
cancer / NAT	P04217	P04217	P04217	-1.89622	1.89622	3.2445e-19	33	P04217	A1BG	Alpha-1B-glycoprotein	A1BG_HUMAN	6	-73.1354	0.268646	cancer
cancer / NAT	P39748	P39748	P39748	1.37486	1.37486	3.30342e-19	132	P39748	FEN1	Flap endonuclease 1	FEN1_HUMAN	22	159.343	2.59343	cancer
cancer / NAT	P05455	P05455	P05455	1.17171	1.17171	3.64304e-19	327	P05455	SSB	Lupus La protein	LA_HUMAN	52	125.279	2.25279	cancer
cancer / NAT	Q14185	Q14185	Q14185	-0.862215	0.862215	3.6622e-19	204	Q14185	DOCK1	Dedicator of cytokinesis protein 1	DOCK1_HUMAN	80	-44.9893	0.550107	cancer
cancer / NAT	P00325	P00325	P00325	-1.42537	1.42537	4.20797e-19	138	P00325	ADH1B	Alcohol dehydrogenase 1B	ADH1B_HUMAN	26	-62.7677	0.372323	cancer
cancer / NAT	P16885	P16885	P16885	0.799762	0.799762	4.4042e-19	225	P16885	PLCG2	1-phosphatidylinositol 4,5-bisphosphate phosphodiesterase gamma-2	PLCG2_HUMAN	69	74.0814	1.74081	cancer
cancer / NAT	Q7Z7B0	Q7Z7B0	Q7Z7B0	-0.955583	0.955583	4.71956e-19	192	Q7Z7B0	FILIP1	Filamin-A-interacting protein 1	FLIP1_HUMAN	87	-48.4367	0.515633	cancer
cancer / NAT	P48449	P48449	P48449	-1.64725	1.64725	5.10632e-19	132	P48449	LSS	Lanosterol synthase	ERG7_HUMAN	37	-68.0752	0.319248	cancer
cancer / NAT	Q5VYK3	Q5VYK3	Q5VYK3	0.604305	0.604305	5.16351e-19	471	Q5VYK3	ECPAS	Proteasome adapter and scaffold protein ECM29	ECM29_HUMAN	115	52.0247	1.52025	cancer
cancer / NAT	P14649	P14649	P14649	-1.51344	1.51344	5.18999e-19	78	P14649	MYL6B	Myosin light chain 6B	MYL6B_HUMAN	22	-64.9724	0.350276	cancer
cancer / NAT	O43310-2	O43310-2	O43310	-1.86999	1.86999	5.24201e-19	39	O43310-2	CTIF	Isoform 2 of CBP80/20-dependent translation initiation factor	CTIF_HUMAN	24	-72.6426	0.273574	cancer
cancer / NAT	P05388	P05388	P05388	0.755198	0.755198	6.07088e-19	150	P05388	RPLP0	60S acidic ribosomal protein P0	RLA0_HUMAN	24	68.7863	1.68786	cancer
cancer / NAT	O15381	O15381	O15381	1.41183	1.41183	6.76029e-19	180	O15381	NVL	Nuclear valosin-containing protein-like	NVL_HUMAN	56	166.074	2.66074	cancer
cancer / NAT	P28288	P28288	P28288	-1.82103	1.82103	7.07914e-19	147	P28288	ABCD3	ATP-binding cassette sub-family D member 3	ABCD3_HUMAN	36	-71.698	0.28302	cancer
cancer / NAT	P05783	P05783	P05783	-2.47016	2.47016	7.13011e-19	99	P05783	KRT18	Keratin, type I cytoskeletal 18	K1C18_HUMAN	29	-81.9529	0.180471	cancer
cancer / NAT	O75592-2	O75592-2	O75592	-0.537086	0.537086	7.69217e-19	300	O75592-2	MYCBP2	Isoform 2 of E3 ubiquitin-protein ligase MYCBP2	MYCB2_HUMAN	156	-31.0838	0.689162	cancer
cancer / NAT	Q9P258	Q9P258	Q9P258	2.23758	2.23758	7.78458e-19	252	Q9P258	RCC2	Protein RCC2	RCC2_HUMAN	46	371.604	4.71604	cancer
cancer / NAT	P80404	P80404	P80404	-2.67126	2.67126	8.23469e-19	135	P80404	ABAT	4-aminobutyrate aminotransferase, mitochondrial	GABT_HUMAN	36	-84.3011	0.156989	cancer
cancer / NAT	O95453;O95453-2	O95453;O95453-2	O95453	1.16961	1.16961	8.47708e-19	192	O95453;O95453-2	PARN	Poly(A)-specific ribonuclease PARN;Isoform 2 of Poly(A)-specific ribonuclease PARN	PARN_HUMAN	45	124.951	2.24951	cancer
cancer / NAT	Q9ULU4-13;Q9ULU4-9	Q9ULU4-13;Q9ULU4-9	Q9ULU4	0.980455	0.980455	8.55984e-19	201	Q9ULU4-13;Q9ULU4-9	ZMYND8	Isoform 13 of Protein kinase C-binding protein 1;Isoform 9 of Protein kinase C-binding protein 1	PKCB1_HUMAN	56	97.3088	1.97309	cancer
cancer / NAT	Q9H9G7	Q9H9G7	Q9H9G7	-0.853616	0.853616	8.87809e-19	162	Q9H9G7	AGO3	Protein argonaute-3	AGO3_HUMAN	47	-44.6604	0.553396	cancer
cancer / NAT	Q53GS9	Q53GS9	Q53GS9	0.988615	0.988615	9.0875e-19	162	Q53GS9	USP39	U4/U6.U5 tri-snRNP-associated protein 2	SNUT2_HUMAN	34	98.428	1.98428	cancer
cancer / NAT	Q96GA7	Q96GA7	Q96GA7	-1.69679	1.69679	9.61755e-19	75	Q96GA7	SDSL	Serine dehydratase-like	SDSL_HUMAN	17	-69.1528	0.308472	cancer
cancer / NAT	Q9Y5Q8	Q9Y5Q8	Q9Y5Q8	0.931359	0.931359	9.61755e-19	132	Q9Y5Q8	GTF3C5	General transcription factor 3C polypeptide 5	TF3C5_HUMAN	39	90.7072	1.90707	cancer
cancer / NAT	P48634	P48634	P48634	1.03231	1.03231	1.00353e-18	270	P48634	PRRC2A	Protein PRRC2A	PRC2A_HUMAN	87	104.529	2.04529	cancer
cancer / NAT	Q15056-2	Q15056-2	Q15056	1.17958	1.17958	1.01003e-18	105	Q15056-2	EIF4H	Isoform Short of Eukaryotic translation initiation factor 4H	IF4H_HUMAN	23	126.511	2.26511	cancer
cancer / NAT	Q16513	Q16513	Q16513	-1.08102	1.08102	1.08187e-18	120	Q16513	PKN2	Serine/threonine-protein kinase N2	PKN2_HUMAN	47	-52.7305	0.472695	cancer
cancer / NAT	P05107	P05107	P05107	2.12518	2.12518	1.11115e-18	180	P05107	ITGB2	Integrin beta-2	ITB2_HUMAN	45	336.259	4.36259	cancer
cancer / NAT	P22352	P22352	P22352	-2.77798	2.77798	1.16191e-18	54	P22352	GPX3	Glutathione peroxidase 3	GPX3_HUMAN	10	-85.4205	0.145795	cancer
cancer / NAT	P05154	P05154	P05154	-3.7562	3.7562	1.18141e-18	75	P05154	SERPINA5	Plasma serine protease inhibitor	IPSP_HUMAN	19	-92.5993	0.0740066	cancer
cancer / NAT	Q96DG6	Q96DG6	Q96DG6	-3.21221	3.21221	1.21794e-18	93	Q96DG6	CMBL	Carboxymethylenebutenolidase homolog	CMBL_HUMAN	22	-89.2098	0.107902	cancer
cancer / NAT	Q9P2I0	Q9P2I0	Q9P2I0	1.12245	1.12245	1.40589e-18	195	Q9P2I0	CPSF2	Cleavage and polyadenylation specificity factor subunit 2	CPSF2_HUMAN	54	117.716	2.17716	cancer
cancer / NAT	P48960;P48960-2;P48960-3	P48960;P48960-2;P48960-3	P48960	1.08689	1.08689	1.4806e-18	66	P48960;P48960-2;P48960-3	CD97	CD97 antigen;Isoform 2 of CD97 antigen;Isoform 3 of CD97 antigen	CD97_HUMAN	15	112.416	2.12416	cancer
cancer / NAT	Q86UV5	Q86UV5	Q86UV5	1.57821	1.57821	1.53034e-18	198	Q86UV5	USP48	Ubiquitin carboxyl-terminal hydrolase 48	UBP48_HUMAN	57	198.598	2.98598	cancer
cancer / NAT	P14866	P14866	P14866	1.00112	1.00112	1.55494e-18	267	P14866	HNRNPL	Heterogeneous nuclear ribonucleoprotein L	HNRPL_HUMAN	38	100.156	2.00156	cancer
cancer / NAT	Q86VB7-3	Q86VB7-3	Q86VB7	-1.30037	1.30037	1.75731e-18	183	Q86VB7-3	CD163	Isoform 3 of Scavenger receptor cysteine-rich type 1 protein M130	C163A_HUMAN	38	-59.3979	0.406021	cancer
cancer / NAT	Q8IWE2	Q8IWE2	Q8IWE2	-2.39505	2.39505	1.76883e-18	108	Q8IWE2	FAM114A1	Protein NOXP20	NXP20_HUMAN	32	-80.9885	0.190115	cancer
cancer / NAT	P35052	P35052	P35052	-2.62613	2.62613	1.81684e-18	99	P35052	GPC1	Glypican-1	GPC1_HUMAN	24	-83.8021	0.161979	cancer
cancer / NAT	O43294	O43294	O43294	-1.77612	1.77612	1.82342e-18	135	O43294	TGFB1I1	Transforming growth factor beta-1-induced transcript 1 protein	TGFI1_HUMAN	30	-70.8033	0.291967	cancer
cancer / NAT	P04632	P04632	P04632	-1.46764	1.46764	1.83027e-18	123	P04632	CAPNS1	Calpain small subunit 1	CPNS1_HUMAN	15	-63.8428	0.361572	cancer
cancer / NAT	Q969Z3	Q969Z3	Q969Z3	-2.9516	2.9516	1.9642e-18	66	Q969Z3	MARC2	Mitochondrial amidoxime reducing component 2	MARC2_HUMAN	18	-87.0735	0.129265	cancer
cancer / NAT	Q7Z4H8	Q7Z4H8	Q7Z4H8	-1.49226	1.49226	1.97232e-18	102	Q7Z4H8	KDELC2	KDEL motif-containing protein 2	KDEL2_HUMAN	24	-64.4544	0.355456	cancer
cancer / NAT	Q9Y265	Q9Y265	Q9Y265	0.767956	0.767956	2.03874e-18	219	Q9Y265	RUVBL1	RuvB-like 1	RUVB1_HUMAN	43	70.2855	1.70286	cancer
cancer / NAT	P29350;P29350-3	P29350;P29350-3	P29350	1.5867	1.5867	2.08388e-18	174	P29350;P29350-3	PTPN6	Tyrosine-protein phosphatase non-receptor type 6;Isoform 2 of Tyrosine-protein phosphatase non-receptor type 6	PTN6_HUMAN	41	200.362	3.00362	cancer
cancer / NAT	P98082;P98082-3	P98082;P98082-3	P98082	-1.81773	1.81773	2.13076e-18	81	P98082;P98082-3	DAB2	Disabled homolog 2;Isoform 3 of Disabled homolog 2	DAB2_HUMAN	21	-71.6334	0.283666	cancer
cancer / NAT	Q92754	Q92754	Q92754	2.28478	2.28478	2.21081e-18	120	Q92754	TFAP2C	Transcription factor AP-2 gamma	AP2C_HUMAN	28	387.291	4.87291	cancer
cancer / NAT	Q9UK59	Q9UK59	Q9UK59	1.12998	1.12998	2.22938e-18	120	Q9UK59	DBR1	Lariat debranching enzyme	DBR1_HUMAN	28	118.855	2.18855	cancer
cancer / NAT	A0MZ66	A0MZ66	A0MZ66	-1.66227	1.66227	2.44347e-18	165	A0MZ66	SHTN1	Shootin-1	SHOT1_HUMAN	56	-68.4058	0.315942	cancer
cancer / NAT	Q9GZZ1	Q9GZZ1	Q9GZZ1	0.872562	0.872562	2.50799e-18	105	Q9GZZ1	NAA50	N-alpha-acetyltransferase 50	NAA50_HUMAN	21	83.0912	1.83091	cancer
cancer / NAT	P52292	P52292	P52292	1.40849	1.40849	2.61602e-18	141	P52292	KPNA2	Importin subunit alpha-1	IMA1_HUMAN	27	165.46	2.6546	cancer
cancer / NAT	Q2PZI1	Q2PZI1	Q2PZI1	-1.38228	1.38228	2.70381e-18	54	Q2PZI1	DPY19L1	Probable C-mannosyltransferase DPY19L1	D19L1_HUMAN	18	-61.6389	0.383611	cancer
cancer / NAT	Q5VT25-2	Q5VT25-2	Q5VT25	0.0583432	0.0583432	2.84672e-18	162	Q5VT25-2	CDC42BPA	Isoform 2 of Serine/threonine-protein kinase MRCK alpha	MRCKA_HUMAN	75	4.12693	1.04127	cancer
cancer / NAT	Q8N163	Q8N163	Q8N163	1.20548	1.20548	3.03632e-18	324	Q8N163	CCAR2	Cell cycle and apoptosis regulator protein 2	CCAR2_HUMAN	67	130.614	2.30614	cancer
cancer / NAT	Q14CX7	Q14CX7	Q14CX7	0.893406	0.893406	3.09517e-18	177	Q14CX7	NAA25	N-alpha-acetyltransferase 25, NatB auxiliary subunit	NAA25_HUMAN	48	85.7556	1.85756	cancer
cancer / NAT	Q9UBT2-2	Q9UBT2-2	Q9UBT2	1.13626	1.13626	3.09517e-18	225	Q9UBT2-2	UBA2	Isoform 2 of SUMO-activating enzyme subunit 2	SAE2_HUMAN	42	119.811	2.19811	cancer
cancer / NAT	Q9H0R4	Q9H0R4	Q9H0R4	-1.36869	1.36869	3.11774e-18	75	Q9H0R4	HDHD2	Haloacid dehalogenase-like hydrolase domain-containing protein 2	HDHD2_HUMAN	21	-61.2757	0.387243	cancer
cancer / NAT	Q9UBB9	Q9UBB9	Q9UBB9	0.968666	0.968666	3.15582e-18	177	Q9UBB9	TFIP11	Tuftelin-interacting protein 11	TFP11_HUMAN	50	95.703	1.95703	cancer
cancer / NAT	P78346-2	P78346-2	P78346	1.36687	1.36687	3.15932e-18	96	P78346-2	RPP30	Isoform 2 of Ribonuclease P protein subunit p30	RPP30_HUMAN	20	157.911	2.57911	cancer
cancer / NAT	P17480-2	P17480-2	P17480	0.736235	0.736235	3.25058e-18	201	P17480-2	UBTF	Isoform UBF2 of Nucleolar transcription factor 1	UBF1_HUMAN	54	66.5823	1.66582	cancer
cancer / NAT	O15217	O15217	O15217	-3.35061	3.35061	3.38248e-18	69	O15217	GSTA4	Glutathione S-transferase A4	GSTA4_HUMAN	12	-90.1968	0.0980317	cancer
cancer / NAT	O60763	O60763	O60763	-0.689084	0.689084	3.41436e-18	276	O60763	USO1	General vesicular transport factor p115	USO1_HUMAN	48	-37.9752	0.620248	cancer
cancer / NAT	Q8IYB3;Q8IYB3-2	Q8IYB3;Q8IYB3-2	Q8IYB3	0.835465	0.835465	3.45747e-18	102	Q8IYB3;Q8IYB3-2	SRRM1	Serine/arginine repetitive matrix protein 1;Isoform 2 of Serine/arginine repetitive matrix protein 1	SRRM1_HUMAN	33	78.4432	1.78443	cancer
cancer / NAT	P29622	P29622	P29622	-1.7395	1.7395	3.48052e-18	114	P29622	SERPINA4	Kallistatin	KAIN_HUMAN	26	-70.0526	0.299474	cancer
cancer / NAT	Q8TF74	Q8TF74	Q8TF74	1.0255	1.0255	3.62072e-18	75	Q8TF74	WIPF2	WAS/WASL-interacting protein family member 2	WIPF2_HUMAN	22	103.567	2.03567	cancer
cancer / NAT	Q9NNW7;Q9NNW7-2	Q9NNW7;Q9NNW7-2	Q9NNW7	-0.937711	0.937711	3.70296e-18	114	Q9NNW7;Q9NNW7-2	TXNRD2	Thioredoxin reductase 2, mitochondrial;Isoform 2 of Thioredoxin reductase 2, mitochondrial	TRXR2_HUMAN	27	-47.7939	0.522061	cancer
cancer / NAT	P34913	P34913	P34913	-2.12705	2.12705	3.70296e-18	123	P34913	EPHX2	Bifunctional epoxide hydrolase 2	HYES_HUMAN	30	-77.1075	0.228925	cancer
cancer / NAT	Q8N9T8	Q8N9T8	Q8N9T8	1.53089	1.53089	3.77926e-18	129	Q8N9T8	KRI1	Protein KRI1 homolog	KRI1_HUMAN	31	188.964	2.88964	cancer
cancer / NAT	Q14194-2	Q14194-2	Q14194	1.64601	1.64601	4.00431e-18	123	Q14194-2	CRMP1	Isoform LCRMP-1 of Dihydropyrimidinase-related protein 1	DPYL1_HUMAN	35	212.968	3.12968	cancer
cancer / NAT	P35611-2;P35611-6	P35611-2;P35611-6	P35611	-1.58475	1.58475	4.06069e-18	216	P35611-2;P35611-6	ADD1	Isoform 2 of Alpha-adducin;Isoform 6 of Alpha-adducin	ADDA_HUMAN	47	-66.6617	0.333383	cancer
cancer / NAT	Q13057;Q13057-2	Q13057;Q13057-2	Q13057	-0.561229	0.561229	4.06903e-18	93	Q13057;Q13057-2	COASY	Bifunctional coenzyme A synthase;Isoform 2 of Bifunctional coenzyme A synthase	COASY_HUMAN	23	-32.2276	0.677724	cancer
cancer / NAT	Q96AE4-2	Q96AE4-2	Q96AE4	1.16773	1.16773	4.09691e-18	234	Q96AE4-2	FUBP1	Isoform 2 of Far upstream element-binding protein 1	FUBP1_HUMAN	44	124.657	2.24657	cancer
cancer / NAT	Q9UPN6	Q9UPN6	Q9UPN6	0.796501	0.796501	4.17528e-18	123	Q9UPN6	SCAF8	Protein SCAF8	SCAF8_HUMAN	37	73.6883	1.73688	cancer
cancer / NAT	P30101	P30101	P30101	-0.481246	0.481246	4.39671e-18	384	P30101	PDIA3	Protein disulfide-isomerase A3	PDIA3_HUMAN	57	-28.3641	0.716359	cancer
cancer / NAT	P27144	P27144	P27144	1.03237	1.03237	4.55643e-18	150	P27144	AK4	Adenylate kinase 4, mitochondrial	KAD4_HUMAN	23	104.538	2.04538	cancer
cancer / NAT	Q99829	Q99829	Q99829	-0.663274	0.663274	4.62339e-18	96	Q99829	CPNE1	Copine-1	CPNE1_HUMAN	21	-36.8556	0.631444	cancer
cancer / NAT	O76094	O76094	O76094	0.427239	0.427239	4.96794e-18	210	O76094	SRP72	Signal recognition particle subunit SRP72	SRP72_HUMAN	52	34.4658	1.34466	cancer
cancer / NAT	Q01968	Q01968	Q01968	-1.43883	1.43883	5.06705e-18	192	Q01968	OCRL	Inositol polyphosphate 5-phosphatase OCRL-1	OCRL_HUMAN	48	-63.1135	0.368865	cancer
cancer / NAT	O94822;O94822-3	O94822;O94822-3	O94822	0.963343	0.963343	5.41032e-18	219	O94822;O94822-3	LTN1	E3 ubiquitin-protein ligase listerin;Isoform 3 of E3 ubiquitin-protein ligase listerin	LTN1_HUMAN	83	94.9823	1.94982	cancer
cancer / NAT	Q09028;Q09028-3	Q09028;Q09028-3	Q09028	0.768939	0.768939	5.43468e-18	156	Q09028;Q09028-3	RBBP4	Histone-binding protein RBBP4;Isoform 3 of Histone-binding protein RBBP4	RBBP4_HUMAN	26	70.4016	1.70402	cancer
cancer / NAT	Q16629;Q16629-4	Q16629;Q16629-4	Q16629	1.03346	1.03346	5.75427e-18	87	Q16629;Q16629-4	SRSF7	Serine/arginine-rich splicing factor 7;Isoform 4 of Serine/arginine-rich splicing factor 7	SRSF7_HUMAN	15	104.692	2.04692	cancer
cancer / NAT	Q16647	Q16647	Q16647	-1.87827	1.87827	5.81856e-18	93	Q16647	PTGIS	Prostacyclin synthase	PTGIS_HUMAN	21	-72.7991	0.272009	cancer
cancer / NAT	B0I1T2	B0I1T2	B0I1T2	1.54432	1.54432	5.9503e-18	168	B0I1T2	MYO1G	Unconventional myosin-Ig	MYO1G_HUMAN	53	191.667	2.91667	cancer
cancer / NAT	P63279	P63279	P63279	0.919048	0.919048	6.22387e-18	108	P63279	UBE2I	SUMO-conjugating enzyme UBC9	UBC9_HUMAN	14	89.0867	1.89087	cancer
cancer / NAT	Q9BWS9	Q9BWS9	Q9BWS9	-2.02965	2.02965	6.35577e-18	147	Q9BWS9	CHID1	Chitinase domain-containing protein 1	CHID1_HUMAN	26	-75.5085	0.244915	cancer
cancer / NAT	O60508	O60508	O60508	1.09761	1.09761	6.35577e-18	96	O60508	CDC40	Pre-mRNA-processing factor 17	PRP17_HUMAN	38	114	2.14	cancer
cancer / NAT	O95980	O95980	O95980	-2.10798	2.10798	6.36467e-18	39	O95980	RECK	Reversion-inducing cysteine-rich protein with Kazal motifs	RECK_HUMAN	30	-76.8028	0.231972	cancer
cancer / NAT	O95081	O95081	O95081	-0.553368	0.553368	6.4351e-18	57	O95081	AGFG2	Arf-GAP domain and FG repeat-containing protein 2	AGFG2_HUMAN	18	-31.8573	0.681427	cancer
cancer / NAT	O95782;O95782-2	O95782;O95782-2	O95782	-1.2301	1.2301	6.76039e-18	261	O95782;O95782-2	AP2A1	AP-2 complex subunit alpha-1;Isoform B of AP-2 complex subunit alpha-1	AP2A1_HUMAN	47	-57.3713	0.426287	cancer
cancer / NAT	P49005	P49005	P49005	1.65397	1.65397	6.76039e-18	96	P49005	POLD2	DNA polymerase delta subunit 2	DPOD2_HUMAN	25	214.699	3.14699	cancer
cancer / NAT	P51114	P51114	P51114	0.877326	0.877326	7.09619e-18	180	P51114	FXR1	Fragile X mental retardation syndrome-related protein 1	FXR1_HUMAN	46	83.6968	1.83697	cancer
cancer / NAT	Q5T230	Q5T230	Q5T230	3.83156	3.83156	7.28227e-18	90	Q5T230	UTF1	Undifferentiated embryonic cell transcription factor 1	UTF1_HUMAN	23	1323.69	14.2369	cancer
cancer / NAT	Q8NI36	Q8NI36	Q8NI36	1.31937	1.31937	7.73238e-18	174	Q8NI36	WDR36	WD repeat-containing protein 36	WDR36_HUMAN	45	149.557	2.49557	cancer
cancer / NAT	Q8NF50;Q8NF50-3	Q8NF50;Q8NF50-3	Q8NF50	0.90423	0.90423	7.81027e-18	171	Q8NF50;Q8NF50-3	DOCK8	Dedicator of cytokinesis protein 8;Isoform 3 of Dedicator of cytokinesis protein 8	DOCK8_HUMAN	80	87.1545	1.87155	cancer
cancer / NAT	P55199	P55199	P55199	1.46931	1.46931	8.07875e-18	96	P55199	ELL	RNA polymerase II elongation factor ELL	ELL_HUMAN	35	176.888	2.76888	cancer
cancer / NAT	P50213	P50213	P50213	-0.893397	0.893397	8.30472e-18	129	P50213	IDH3A	Isocitrate dehydrogenase [NAD] subunit alpha, mitochondrial	IDH3A_HUMAN	25	-46.1655	0.538345	cancer
cancer / NAT	Q8TCS8	Q8TCS8	Q8TCS8	1.11049	1.11049	8.51872e-18	270	Q8TCS8	PNPT1	Polyribonucleotide nucleotidyltransferase 1, mitochondrial	PNPT1_HUMAN	54	115.919	2.15919	cancer
cancer / NAT	Q92995	Q92995	Q92995	-1.63142	1.63142	8.51872e-18	87	Q92995	USP13	Ubiquitin carboxyl-terminal hydrolase 13	UBP13_HUMAN	35	-67.7229	0.322771	cancer
cancer / NAT	O43772	O43772	O43772	-1.01854	1.01854	8.79386e-18	72	O43772	SLC25A20	Mitochondrial carnitine/acylcarnitine carrier protein	MCAT_HUMAN	20	-50.6383	0.493617	cancer
cancer / NAT	Q96TA1;Q96TA1-2	Q96TA1;Q96TA1-2	Q96TA1	-1.15312	1.15312	8.93222e-18	180	Q96TA1;Q96TA1-2	FAM129B	Niban-like protein 1;Isoform 2 of Niban-like protein 1	NIBL1_HUMAN	38	-55.0348	0.449652	cancer
cancer / NAT	P37802;P37802-2	P37802;P37802-2	P37802	-0.826089	0.826089	8.95261e-18	138	P37802;P37802-2	TAGLN2	Transgelin-2;Isoform 2 of Transgelin-2	TAGL2_HUMAN	22	-43.5944	0.564056	cancer
cancer / NAT	Q6NZY4	Q6NZY4	Q6NZY4	1.55148	1.55148	9.43864e-18	162	Q6NZY4	ZCCHC8	Zinc finger CCHC domain-containing protein 8	ZCHC8_HUMAN	41	193.118	2.93118	cancer
cancer / NAT	Q13085	Q13085	Q13085	-0.543375	0.543375	9.97209e-18	351	Q13085	ACACA	Acetyl-CoA carboxylase 1	ACACA_HUMAN	122	-31.3836	0.686164	cancer
cancer / NAT	Q9H910;Q9H910-3	Q9H910;Q9H910-3	Q9H910	1.14131	1.14131	1.08602e-17	66	Q9H910;Q9H910-3	JPT2	Jupiter microtubule associated homolog 2;Isoform 3 of Jupiter microtubule associated homolog 2	JUPI2_HUMAN	12	120.582	2.20582	cancer
cancer / NAT	Q8WXX5	Q8WXX5	Q8WXX5	1.77823	1.77823	1.08859e-17	114	Q8WXX5	DNAJC9	DnaJ homolog subfamily C member 9	DNJC9_HUMAN	27	243.006	3.43006	cancer
cancer / NAT	P46020;P46020-2	P46020;P46020-2	P46020	0.371526	0.371526	1.1587e-17	159	P46020;P46020-2	PHKA1	Phosphorylase b kinase regulatory subunit alpha, skeletal muscle isoform;Isoform 2 of Phosphorylase b kinase regulatory subunit alpha, skeletal muscle isoform	KPB1_HUMAN	40	29.3721	1.29372	cancer
cancer / NAT	Q9H2P0	Q9H2P0	Q9H2P0	1.26523	1.26523	1.18543e-17	255	Q9H2P0	ADNP	Activity-dependent neuroprotector homeobox protein	ADNP_HUMAN	79	140.366	2.40366	cancer
cancer / NAT	Q9NX40	Q9NX40	Q9NX40	-0.626551	0.626551	1.20694e-17	93	Q9NX40	OCIAD1	OCIA domain-containing protein 1	OCAD1_HUMAN	21	-35.2277	0.647723	cancer
cancer / NAT	O75390	O75390	O75390	0.689264	0.689264	1.24803e-17	201	O75390	CS	Citrate synthase, mitochondrial	CISY_HUMAN	29	61.2461	1.61246	cancer
cancer / NAT	O96017	O96017	O96017	1.93495	1.93495	1.29346e-17	129	O96017	CHEK2	Serine/threonine-protein kinase Chk2	CHK2_HUMAN	34	282.365	3.82365	cancer
cancer / NAT	P48506	P48506	P48506	-0.979589	0.979589	1.38185e-17	150	P48506	GCLC	Glutamate--cysteine ligase catalytic subunit	GSH1_HUMAN	37	-49.2876	0.507124	cancer
cancer / NAT	P19652	P19652	P19652	-1.73927	1.73927	1.38527e-17	75	P19652	ORM2	Alpha-1-acid glycoprotein 2	A1AG2_HUMAN	12	-70.0478	0.299522	cancer
cancer / NAT	P02652	P02652	P02652	-1.59646	1.59646	1.38797e-17	75	P02652	APOA2	Apolipoprotein A-II	APOA2_HUMAN	12	-66.9313	0.330687	cancer
cancer / NAT	P43155;P43155-2	P43155;P43155-2	P43155	-1.69043	1.69043	1.50391e-17	81	P43155;P43155-2	CRAT	Carnitine O-acetyltransferase;Isoform 2 of Carnitine O-acetyltransferase	CACP_HUMAN	29	-69.0166	0.309834	cancer
cancer / NAT	O94832	O94832	O94832	-1.04847	1.04847	1.61041e-17	258	O94832	MYO1D	Unconventional myosin-Id	MYO1D_HUMAN	65	-51.6521	0.483479	cancer
cancer / NAT	P32119	P32119	P32119	-1.09069	1.09069	1.70113e-17	102	P32119	PRDX2	Peroxiredoxin-2	PRDX2_HUMAN	20	-53.0464	0.469536	cancer
cancer / NAT	Q86UU1-2	Q86UU1-2	Q86UU1	-1.2397	1.2397	1.87157e-17	153	Q86UU1-2	PHLDB1	Isoform 2 of Pleckstrin homology-like domain family B member 1	PHLB1_HUMAN	61	-57.6541	0.423459	cancer
cancer / NAT	Q8NB37	Q8NB37	Q8NB37	-1.38943	1.38943	1.92321e-17	39	Q8NB37	GATD1	Glutamine amidotransferase-like class 1 domain-containing protein 1	GALD1_HUMAN	10	-61.8284	0.381716	cancer
cancer / NAT	Q04637;Q04637-3;Q04637-9	Q04637;Q04637-3;Q04637-9	Q04637	0.525583	0.525583	1.97946e-17	357	Q04637;Q04637-3;Q04637-9	EIF4G1	Eukaryotic translation initiation factor 4 gamma 1;Isoform B of Eukaryotic translation initiation factor 4 gamma 1;Isoform 9 of Eukaryotic translation initiation factor 4 gamma 1	IF4G1_HUMAN	84	43.9516	1.43952	cancer
cancer / NAT	P00491	P00491	P00491	1.31644	1.31644	1.99908e-17	168	P00491	PNP	Purine nucleoside phosphorylase	PNPH_HUMAN	23	149.051	2.49051	cancer
cancer / NAT	P15586	P15586	P15586	-0.910919	0.910919	2.10617e-17	75	P15586	GNS	N-acetylglucosamine-6-sulfatase	GNS_HUMAN	18	-46.8154	0.531846	cancer
cancer / NAT	Q8N6R0	Q8N6R0	Q8N6R0	0.889834	0.889834	2.2076e-17	138	Q8N6R0	METTL13	Methyltransferase-like protein 13	MET13_HUMAN	46	85.2963	1.85296	cancer
cancer / NAT	P35573	P35573	P35573	0.596863	0.596863	2.22716e-17	519	P35573	AGL	Glycogen debranching enzyme	GDE_HUMAN	114	51.2424	1.51242	cancer
cancer / NAT	P42330	P42330	P42330	-3.03438	3.03438	2.27125e-17	69	P42330	AKR1C3	Aldo-keto reductase family 1 member C3	AK1C3_HUMAN	17	-87.7944	0.122056	cancer
cancer / NAT	P31040	P31040	P31040	-0.693268	0.693268	2.5046e-17	204	P31040	SDHA	Succinate dehydrogenase [ubiquinone] flavoprotein subunit, mitochondrial	SDHA_HUMAN	37	-38.1549	0.618451	cancer
cancer / NAT	Q9UBQ7	Q9UBQ7	Q9UBQ7	-1.49515	1.49515	2.5046e-17	144	Q9UBQ7	GRHPR	Glyoxylate reductase/hydroxypyruvate reductase	GRHPR_HUMAN	25	-64.5255	0.354745	cancer
cancer / NAT	Q9NYU1	Q9NYU1	Q9NYU1	-0.379565	0.379565	2.5046e-17	132	Q9NYU1	UGGT2	UDP-glucose:glycoprotein glucosyltransferase 2	UGGG2_HUMAN	63	-23.1331	0.768669	cancer
cancer / NAT	Q96CN7	Q96CN7	Q96CN7	-0.98556	0.98556	2.68756e-17	84	Q96CN7	ISOC1	Isochorismatase domain-containing protein 1	ISOC1_HUMAN	16	-49.497	0.50503	cancer
cancer / NAT	P09471	P09471	P09471	-2.96262	2.96262	2.78215e-17	69	P09471	GNAO1	Guanine nucleotide-binding protein G(o) subunit alpha	GNAO_HUMAN	14	-87.1719	0.128281	cancer
cancer / NAT	P07360	P07360	P07360	-1.93913	1.93913	2.84511e-17	60	P07360	C8G	Complement component C8 gamma chain	CO8G_HUMAN	13	-73.9226	0.260774	cancer
cancer / NAT	P06454;P06454-2	P06454;P06454-2	P06454	1.74095	1.74095	3.02664e-17	54	P06454;P06454-2	PTMA	Prothymosin alpha;Isoform 2 of Prothymosin alpha	PTMA_HUMAN	9	234.255	3.34255	cancer
cancer / NAT	Q96A35	Q96A35	Q96A35	0.828001	0.828001	3.09128e-17	54	Q96A35	MRPL24	39S ribosomal protein L24, mitochondrial	RM24_HUMAN	13	77.5224	1.77522	cancer
cancer / NAT	O15042-2	O15042-2	O15042	1.1533	1.1533	3.4209e-17	255	O15042-2	U2SURP	Isoform 2 of U2 snRNP-associated SURP motif-containing protein	SR140_HUMAN	57	122.422	2.22422	cancer
cancer / NAT	Q6UXV4	Q6UXV4	Q6UXV4	-1.73187	1.73187	3.4867e-17	93	Q6UXV4	APOOL	MICOS complex subunit MIC27	MIC27_HUMAN	20	-69.8939	0.301061	cancer
cancer / NAT	P07339	P07339	P07339	-0.658964	0.658964	3.68913e-17	159	P07339	CTSD	Cathepsin D	CATD_HUMAN	22	-36.6667	0.633333	cancer
cancer / NAT	Q13185	Q13185	Q13185	1.92839	1.92839	3.74576e-17	102	Q13185	CBX3	Chromobox protein homolog 3	CBX3_HUMAN	18	280.631	3.80631	cancer
cancer / NAT	Q16877;Q16877-2	Q16877;Q16877-2	Q16877	-2.70779	2.70779	3.81668e-17	84	Q16877;Q16877-2	PFKFB4	6-phosphofructo-2-kinase/fructose-2,6-bisphosphatase 4;Isoform 2 of 6-phosphofructo-2-kinase/fructose-2,6-bisphosphatase 4	F264_HUMAN	29	-84.6936	0.153064	cancer
cancer / NAT	O94788	O94788	O94788	-2.71312	2.71312	3.96475e-17	90	O94788	ALDH1A2	Retinal dehydrogenase 2	AL1A2_HUMAN	29	-84.75	0.1525	cancer
cancer / NAT	Q14693-3;Q14693-5;Q14693-7	Q14693-3;Q14693-5;Q14693-7	Q14693	-0.956255	0.956255	4.00349e-17	99	Q14693-3;Q14693-5;Q14693-7	LPIN1	Isoform 3 of Phosphatidate phosphatase LPIN1;Isoform 5 of Phosphatidate phosphatase LPIN1;Isoform 7 of Phosphatidate phosphatase LPIN1	LPIN1_HUMAN	27	-48.4607	0.515393	cancer
cancer / NAT	Q9Y6N6	Q9Y6N6	Q9Y6N6	-1.13242	1.13242	4.26413e-17	192	Q9Y6N6	LAMC3	Laminin subunit gamma-3	LAMC3_HUMAN	55	-54.3851	0.456149	cancer
cancer / NAT	O75367;O75367-3	O75367;O75367-3	O75367	-1.78185	1.78185	4.2966e-17	138	O75367;O75367-3	H2AFY	Core histone macro-H2A.1;Isoform 3 of Core histone macro-H2A.1	H2AY_HUMAN	26	-70.919	0.29081	cancer
cancer / NAT	O00567	O00567	O00567	0.727491	0.727491	4.3672e-17	306	O00567	NOP56	Nucleolar protein 56	NOP56_HUMAN	55	65.5757	1.65576	cancer
cancer / NAT	Q96P11-2	Q96P11-2	Q96P11	1.51893	1.51893	4.53836e-17	132	Q96P11-2	NSUN5	Isoform 2 of Probable 28S rRNA (cytosine-C(5))-methyltransferase	NSUN5_HUMAN	33	186.578	2.86578	cancer
cancer / NAT	O60287	O60287	O60287	1.55758	1.55758	4.58282e-17	234	O60287	URB1	Nucleolar pre-ribosomal-associated protein 1	NPA1P_HUMAN	86	194.359	2.94359	cancer
cancer / NAT	O14497	O14497	O14497	0.969245	0.969245	4.61981e-17	246	O14497	ARID1A	AT-rich interactive domain-containing protein 1A	ARI1A_HUMAN	76	95.7815	1.95782	cancer
cancer / NAT	Q9NRX4	Q9NRX4	Q9NRX4	-0.940987	0.940987	4.79644e-17	57	Q9NRX4	PHPT1	14 kDa phosphohistidine phosphatase	PHP14_HUMAN	11	-47.9124	0.520876	cancer
cancer / NAT	Q12972	Q12972	Q12972	0.938082	0.938082	4.837e-17	108	Q12972	PPP1R8	Nuclear inhibitor of protein phosphatase 1	PP1R8_HUMAN	22	91.5979	1.91598	cancer
cancer / NAT	P50402	P50402	P50402	-1.36073	1.36073	5.56827e-17	105	P50402	EMD	Emerin	EMD_HUMAN	22	-61.0616	0.389384	cancer
cancer / NAT	Q15436	Q15436	Q15436	-0.290836	0.290836	5.58086e-17	198	Q15436	SEC23A	Protein transport protein Sec23A	SC23A_HUMAN	44	-18.2572	0.817428	cancer
cancer / NAT	Q96PZ0;Q96PZ0-2	Q96PZ0;Q96PZ0-2	Q96PZ0	1.19008	1.19008	5.62631e-17	183	Q96PZ0;Q96PZ0-2	PUS7	Pseudouridylate synthase 7 homolog;Isoform 2 of Pseudouridylate synthase 7 homolog	PUS7_HUMAN	52	128.166	2.28166	cancer
cancer / NAT	Q7L2J0	Q7L2J0	Q7L2J0	1.04042	1.04042	6.35859e-17	135	Q7L2J0	MEPCE	7SK snRNA methylphosphate capping enzyme	MEPCE_HUMAN	36	105.683	2.05683	cancer
cancer / NAT	Q5SW96	Q5SW96	Q5SW96	1.61433	1.61433	6.47077e-17	63	Q5SW96	LDLRAP1	Low density lipoprotein receptor adapter protein 1	ARH_HUMAN	19	206.17	3.0617	cancer
cancer / NAT	Q14914	Q14914	Q14914	-0.724136	0.724136	6.61462e-17	99	Q14914	PTGR1	Prostaglandin reductase 1	PTGR1_HUMAN	21	-39.464	0.60536	cancer
cancer / NAT	Q6PJG6	Q6PJG6	Q6PJG6	0.864076	0.864076	6.91311e-17	162	Q6PJG6	BRAT1	BRCA1-associated ATM activator 1	BRAT1_HUMAN	43	82.0174	1.82017	cancer
cancer / NAT	P22792	P22792	P22792	-1.67998	1.67998	7.20671e-17	69	P22792	CPN2	Carboxypeptidase N subunit 2	CPN2_HUMAN	15	-68.7912	0.312088	cancer
cancer / NAT	Q9NRZ7;Q9NRZ7-2;Q9NRZ7-3	Q9NRZ7;Q9NRZ7-2;Q9NRZ7-3	Q9NRZ7	-1.72214	1.72214	7.29225e-17	48	Q9NRZ7;Q9NRZ7-2;Q9NRZ7-3	AGPAT3	1-acyl-sn-glycerol-3-phosphate acyltransferase gamma;Isoform 2 of 1-acyl-sn-glycerol-3-phosphate acyltransferase gamma;Isoform 3 of 1-acyl-sn-glycerol-3-phosphate acyltransferase gamma	PLCC_HUMAN	21	-69.6901	0.303099	cancer
cancer / NAT	O75326	O75326	O75326	-2.98499	2.98499	7.36267e-17	63	O75326	SEMA7A	Semaphorin-7A	SEM7A_HUMAN	29	-87.3693	0.126307	cancer
cancer / NAT	Q8N129	Q8N129	Q8N129	-1.42029	1.42029	7.4067e-17	42	Q8N129	CNPY4	Protein canopy homolog 4	CNPY4_HUMAN	15	-62.6362	0.373638	cancer
cancer / NAT	O60885	O60885	O60885	0.804926	0.804926	7.67883e-17	192	O60885	BRD4	Bromodomain-containing protein 4	BRD4_HUMAN	50	74.7056	1.74706	cancer
cancer / NAT	P51608	P51608	P51608	-1.29618	1.29618	7.9525e-17	177	P51608	MECP2	Methyl-CpG-binding protein 2	MECP2_HUMAN	36	-59.2797	0.407203	cancer
cancer / NAT	O75362	O75362	O75362	1.93999	1.93999	8.07649e-17	141	O75362	ZNF217	Zinc finger protein 217	ZN217_HUMAN	53	283.702	3.83702	cancer
cancer / NAT	Q1ED39	Q1ED39	Q1ED39	1.89609	1.89609	8.13058e-17	126	Q1ED39	KNOP1	Lysine-rich nucleolar protein 1	KNOP1_HUMAN	49	272.203	3.72203	cancer
cancer / NAT	Q92896;Q92896-2	Q92896;Q92896-2	Q92896	-0.953378	0.953378	8.1316e-17	333	Q92896;Q92896-2	GLG1	Golgi apparatus protein 1;Isoform 2 of Golgi apparatus protein 1	GSLG1_HUMAN	70	-48.3578	0.516422	cancer
cancer / NAT	O75530;O75530-3	O75530;O75530-3	O75530	1.23506	1.23506	8.25639e-17	75	O75530;O75530-3	EED	Polycomb protein EED;Isoform 3 of Polycomb protein EED	EED_HUMAN	19	135.392	2.35392	cancer
cancer / NAT	P23246	P23246	P23246	1.00077	1.00077	8.32464e-17	360	P23246	SFPQ	Splicing factor, proline- and glutamine-rich	SFPQ_HUMAN	51	100.107	2.00107	cancer
cancer / NAT	P04083	P04083	P04083	-0.977974	0.977974	8.72271e-17	204	P04083	ANXA1	Annexin A1	ANXA1_HUMAN	33	-49.2308	0.507692	cancer
cancer / NAT	O43818	O43818	O43818	1.53882	1.53882	8.98276e-17	162	O43818	RRP9	U3 small nucleolar RNA-interacting protein 2	U3IP2_HUMAN	31	190.556	2.90556	cancer
cancer / NAT	O14498	O14498	O14498	-1.9147	1.9147	9.19994e-17	36	O14498	ISLR	Immunoglobulin superfamily containing leucine-rich repeat protein	ISLR_HUMAN	11	-73.4773	0.265227	cancer
cancer / NAT	P54289;P54289-4;P54289-5	P54289;P54289-4;P54289-5	P54289	-2.10039	2.10039	9.26206e-17	135	P54289;P54289-4;P54289-5	CACNA2D1	Voltage-dependent calcium channel subunit alpha-2/delta-1;Isoform 4 of Voltage-dependent calcium channel subunit alpha-2/delta-1;Isoform 5 of Voltage-dependent calcium channel subunit alpha-2/delta-1	CA2D1_HUMAN	35	-76.6805	0.233195	cancer
cancer / NAT	P51570;P51570-2	P51570;P51570-2	P51570	-0.668338	0.668338	9.53485e-17	129	P51570;P51570-2	GALK1	Galactokinase;Isoform 2 of Galactokinase	GALK1_HUMAN	26	-37.0769	0.629231	cancer
cancer / NAT	Q687X5	Q687X5	Q687X5	-3.76915	3.76915	1.01841e-16	81	Q687X5	STEAP4	Metalloreductase STEAP4	STEA4_HUMAN	21	-92.6655	0.0733452	cancer
cancer / NAT	O43707	O43707	O43707	0.446517	0.446517	1.02595e-16	390	O43707	ACTN4	Alpha-actinin-4	ACTN4_HUMAN	60	36.2747	1.36275	cancer
cancer / NAT	P05155;P05155-3	P05155;P05155-3	P05155	-1.80853	1.80853	1.04198e-16	138	P05155;P05155-3	SERPING1	Plasma protease C1 inhibitor;Isoform 3 of Plasma protease C1 inhibitor	IC1_HUMAN	23	-71.4519	0.285481	cancer
cancer / NAT	Q9Y3P9	Q9Y3P9	Q9Y3P9	-1.75681	1.75681	1.04198e-16	150	Q9Y3P9	RABGAP1	Rab GTPase-activating protein 1	RBGP1_HUMAN	52	-70.4098	0.295902	cancer
cancer / NAT	Q9C0I1	Q9C0I1	Q9C0I1	-1.65178	1.65178	1.0895e-16	105	Q9C0I1	MTMR12	Myotubularin-related protein 12	MTMRC_HUMAN	35	-68.1753	0.318247	cancer
cancer / NAT	Q9H0W9;Q9H0W9-2	Q9H0W9;Q9H0W9-2	Q9H0W9	-0.884566	0.884566	1.10604e-16	84	Q9H0W9;Q9H0W9-2	C11orf54	Ester hydrolase C11orf54;Isoform 2 of Ester hydrolase C11orf54	CK054_HUMAN	17	-45.835	0.54165	cancer
cancer / NAT	P35527	P35527	P35527	-0.839749	0.839749	1.13868e-16	126	P35527	KRT9	Keratin, type I cytoskeletal 9	K1C9_HUMAN	39	-44.1259	0.558741	cancer
cancer / NAT	O75962	O75962	O75962	-1.68919	1.68919	1.15365e-16	138	O75962	TRIO	Triple functional domain protein	TRIO_HUMAN	100	-68.9899	0.310101	cancer
cancer / NAT	Q5T013	Q5T013	Q5T013	-1.26682	1.26682	1.33873e-16	39	Q5T013	HYI	Putative hydroxypyruvate isomerase	HYI_HUMAN	14	-58.4426	0.415574	cancer
cancer / NAT	A6NHX0	A6NHX0	A6NHX0	1.31154	1.31154	1.38137e-16	66	A6NHX0	CASTOR2	Cytosolic arginine sensor for mTORC1 subunit 2	CAST2_HUMAN	12	148.207	2.48207	cancer
cancer / NAT	Q9NVD7	Q9NVD7	Q9NVD7	-1.90114	1.90114	1.39756e-16	93	Q9NVD7	PARVA	Alpha-parvin	PARVA_HUMAN	27	-73.2268	0.267732	cancer
cancer / NAT	Q9H488	Q9H488	Q9H488	-1.26539	1.26539	1.4057e-16	138	Q9H488	POFUT1	GDP-fucose protein O-fucosyltransferase 1	OFUT1_HUMAN	20	-58.4012	0.415988	cancer
cancer / NAT	Q12906-7	Q12906-7	Q12906	0.656284	0.656284	1.42077e-16	429	Q12906-7	ILF3	Isoform 7 of Interleukin enhancer-binding factor 3	ILF3_HUMAN	77	57.6018	1.57602	cancer
cancer / NAT	Q16630-2	Q16630-2	Q16630	1.08032	1.08032	1.5049e-16	96	Q16630-2	CPSF6	Isoform 2 of Cleavage and polyadenylation specificity factor subunit 6	CPSF6_HUMAN	20	111.45	2.1145	cancer
cancer / NAT	Q14146	Q14146	Q14146	1.51559	1.51559	1.54076e-16	135	Q14146	URB2	Unhealthy ribosome biogenesis protein 2 homolog	URB2_HUMAN	55	185.916	2.85916	cancer
cancer / NAT	Q9BTW9	Q9BTW9	Q9BTW9	0.85434	0.85434	1.56084e-16	255	Q9BTW9	TBCD	Tubulin-specific chaperone D	TBCD_HUMAN	62	80.7932	1.80793	cancer
cancer / NAT	P14923	P14923	P14923	1.50427	1.50427	1.67e-16	126	P14923	JUP	Junction plakoglobin	PLAK_HUMAN	33	183.68	2.8368	cancer
cancer / NAT	O94851;O94851-5	O94851;O94851-5	O94851	-2.85433	2.85433	1.69887e-16	114	O94851;O94851-5	MICAL2	[F-actin]-monooxygenase MICAL2;Isoform 5 of [F-actin]-monooxygenase MICAL2	MICA2_HUMAN	41	-86.172	0.13828	cancer
cancer / NAT	Q16658	Q16658	Q16658	-0.638418	0.638418	1.75236e-16	243	Q16658	FSCN1	Fascin	FSCN1_HUMAN	42	-35.7583	0.642417	cancer
cancer / NAT	Q8NBU5	Q8NBU5	Q8NBU5	-0.678397	0.678397	1.75451e-16	63	Q8NBU5	ATAD1	ATPase family AAA domain-containing protein 1	ATAD1_HUMAN	19	-37.5141	0.624859	cancer
cancer / NAT	P21796	P21796	P21796	-1.27714	1.27714	1.76378e-16	99	P21796	VDAC1	Voltage-dependent anion-selective channel protein 1	VDAC1_HUMAN	23	-58.7387	0.412613	cancer
cancer / NAT	Q9BUT1	Q9BUT1	Q9BUT1	-2.35437	2.35437	1.78779e-16	57	Q9BUT1	BDH2	3-hydroxybutyrate dehydrogenase type 2	BDH2_HUMAN	12	-80.4447	0.195553	cancer
cancer / NAT	Q9NQW6	Q9NQW6	Q9NQW6	1.97436	1.97436	1.82673e-16	135	Q9NQW6	ANLN	Anillin	ANLN_HUMAN	54	292.955	3.92955	cancer
cancer / NAT	Q07157	Q07157	Q07157	-3.35462	3.35462	1.90759e-16	27	Q07157	TJP1	Tight junction protein ZO-1	ZO1_HUMAN	6	-90.2241	0.0977592	cancer
cancer / NAT	P02730	P02730	P02730	-1.50237	1.50237	1.92176e-16	132	P02730	SLC4A1	Band 3 anion transport protein	B3AT_HUMAN	29	-64.7028	0.352972	cancer
cancer / NAT	Q9H173	Q9H173	Q9H173	-1.55826	1.55826	1.92925e-16	45	Q9H173	SIL1	Nucleotide exchange factor SIL1	SIL1_HUMAN	21	-66.044	0.33956	cancer
cancer / NAT	P62879	P62879	P62879	-0.862608	0.862608	2.02078e-16	111	P62879	GNB2	Guanine nucleotide-binding protein G(I)/G(S)/G(T) subunit beta-2	GBB2_HUMAN	18	-45.0042	0.549958	cancer
cancer / NAT	Q9NRX1	Q9NRX1	Q9NRX1	1.21345	1.21345	2.13381e-16	69	Q9NRX1	PNO1	RNA-binding protein PNO1	PNO1_HUMAN	15	131.892	2.31892	cancer
cancer / NAT	Q12860	Q12860	Q12860	-3.07074	3.07074	2.15012e-16	90	Q12860	CNTN1	Contactin-1	CNTN1_HUMAN	40	-88.0981	0.119019	cancer
cancer / NAT	P39060;P39060-1;P39060-2	P39060;P39060-1;P39060-2	P39060	-0.335915	0.335915	2.17473e-16	165	P39060;P39060-1;P39060-2	COL18A1	Collagen alpha-1(XVIII) chain;Isoform 2 of Collagen alpha-1(XVIII) chain;Isoform 3 of Collagen alpha-1(XVIII) chain	COIA1_HUMAN	29	-20.7719	0.792281	cancer
cancer / NAT	Q9BT22	Q9BT22	Q9BT22	-0.506429	0.506429	2.2167e-16	48	Q9BT22	ALG1	Chitobiosyldiphosphodolichol beta-mannosyltransferase	ALG1_HUMAN	12	-29.6037	0.703963	cancer
cancer / NAT	Q9BXU1;Q9BXU1-2	Q9BXU1;Q9BXU1-2	Q9BXU1	-3.71074	3.71074	2.22063e-16	120	Q9BXU1;Q9BXU1-2	STK31	Serine/threonine-protein kinase 31;Isoform 2 of Serine/threonine-protein kinase 31	STK31_HUMAN	47	-92.3624	0.0763759	cancer
cancer / NAT	Q92922	Q92922	Q92922	1.27461	1.27461	2.22254e-16	204	Q92922	SMARCC1	SWI/SNF complex subunit SMARCC1	SMRC1_HUMAN	54	141.934	2.41934	cancer
cancer / NAT	P09972	P09972	P09972	-0.63381	0.63381	2.2492e-16	165	P09972	ALDOC	Fructose-bisphosphate aldolase C	ALDOC_HUMAN	30	-35.5528	0.644472	cancer
cancer / NAT	Q9H8Y5	Q9H8Y5	Q9H8Y5	1.05214	1.05214	2.49917e-16	90	Q9H8Y5	ANKZF1	Ankyrin repeat and zinc finger domain-containing protein 1	ANKZ1_HUMAN	35	107.361	2.07361	cancer
cancer / NAT	Q9Y3Q0	Q9Y3Q0	Q9Y3Q0	-3.59544	3.59544	2.56577e-16	96	Q9Y3Q0	NAALAD2	N-acetylated-alpha-linked acidic dipeptidase 2	NALD2_HUMAN	32	-91.727	0.0827303	cancer
cancer / NAT	P30876	P30876	P30876	0.972876	0.972876	2.56651e-16	312	P30876	POLR2B	DNA-directed RNA polymerase II subunit RPB2	RPB2_HUMAN	75	96.275	1.96275	cancer
cancer / NAT	Q8TEX9;Q8TEX9-2	Q8TEX9;Q8TEX9-2	Q8TEX9	0.86893	0.86893	2.61761e-16	252	Q8TEX9;Q8TEX9-2	IPO4	Importin-4;Isoform 2 of Importin-4	IPO4_HUMAN	50	82.6308	1.82631	cancer
cancer / NAT	P30044	P30044	P30044	-1.25738	1.25738	2.64555e-16	90	P30044	PRDX5	Peroxiredoxin-5, mitochondrial	PRDX5_HUMAN	15	-58.1698	0.418302	cancer
cancer / NAT	Q15291	Q15291	Q15291	1.18569	1.18569	2.70816e-16	111	Q15291	RBBP5	Retinoblastoma-binding protein 5	RBBP5_HUMAN	30	127.473	2.27473	cancer
cancer / NAT	P28838-2	P28838-2	P28838	-0.411327	0.411327	2.83417e-16	270	P28838-2	LAP3	Isoform 2 of Cytosol aminopeptidase	AMPL_HUMAN	47	-24.8068	0.751932	cancer
cancer / NAT	P30740	P30740	P30740	-0.549789	0.549789	2.95111e-16	150	P30740	SERPINB1	Leukocyte elastase inhibitor	ILEU_HUMAN	26	-31.688	0.68312	cancer
cancer / NAT	P40763-2	P40763-2	P40763	-0.727143	0.727143	3.01745e-16	249	P40763-2	STAT3	Isoform Del-701 of Signal transducer and activator of transcription 3	STAT3_HUMAN	51	-39.5901	0.604099	cancer
cancer / NAT	Q9BZL4-3	Q9BZL4-3	Q9BZL4	-1.08449	1.08449	3.01887e-16	138	Q9BZL4-3	PPP1R12C	Isoform 3 of Protein phosphatase 1 regulatory subunit 12C	PP12C_HUMAN	46	-52.8441	0.471559	cancer
cancer / NAT	P42167	P42167	P42167	0.97312	0.97312	3.09881e-16	186	P42167	TMPO	Lamina-associated polypeptide 2, isoforms beta/gamma	LAP2B_HUMAN	35	96.3082	1.96308	cancer
cancer / NAT	Q13838	Q13838	Q13838	0.745918	0.745918	3.1351e-16	135	Q13838	DDX39B	Spliceosome RNA helicase DDX39B	DX39B_HUMAN	20	67.7042	1.67704	cancer
cancer / NAT	P57678	P57678	P57678	0.925145	0.925145	3.30587e-16	129	P57678	GEMIN4	Gem-associated protein 4	GEMI4_HUMAN	41	89.8875	1.89888	cancer
cancer / NAT	Q6SZW1	Q6SZW1	Q6SZW1	-0.739873	0.739873	3.55195e-16	102	Q6SZW1	SARM1	Sterile alpha and TIR motif-containing protein 1	SARM1_HUMAN	34	-40.1208	0.598792	cancer
cancer / NAT	Q7L1Q6;Q7L1Q6-3;Q7L1Q6-4	Q7L1Q6;Q7L1Q6-3;Q7L1Q6-4	Q7L1Q6	0.430362	0.430362	3.73176e-16	144	Q7L1Q6;Q7L1Q6-3;Q7L1Q6-4	BZW1	Basic leucine zipper and W2 domain-containing protein 1;Isoform 3 of Basic leucine zipper and W2 domain-containing protein 1;Isoform 4 of Basic leucine zipper and W2 domain-containing protein 1	BZW1_HUMAN	32	34.7572	1.34757	cancer
cancer / NAT	P04899	P04899	P04899	-0.480348	0.480348	3.93114e-16	147	P04899	GNAI2	Guanine nucleotide-binding protein G(i) subunit alpha-2	GNAI2_HUMAN	27	-28.3195	0.716805	cancer
cancer / NAT	Q9Y5S9	Q9Y5S9	Q9Y5S9	1.83093	1.83093	3.93156e-16	63	Q9Y5S9	RBM8A	RNA-binding protein 8A	RBM8A_HUMAN	11	255.766	3.55766	cancer
cancer / NAT	P47712	P47712	P47712	-2.29665	2.29665	4.07202e-16	87	P47712	PLA2G4A	Cytosolic phospholipase A2	PA24A_HUMAN	30	-79.6464	0.203536	cancer
cancer / NAT	Q96PK6	Q96PK6	Q96PK6	1.02157	1.02157	4.22631e-16	198	Q96PK6	RBM14	RNA-binding protein 14	RBM14_HUMAN	42	103.012	2.03012	cancer
cancer / NAT	O76021	O76021	O76021	0.738134	0.738134	4.24992e-16	210	O76021	RSL1D1	Ribosomal L1 domain-containing protein 1	RL1D1_HUMAN	39	66.8017	1.66802	cancer
cancer / NAT	Q8N0X4	Q8N0X4	Q8N0X4	-1.98409	1.98409	4.51488e-16	72	Q8N0X4	CLYBL	Citramalyl-CoA lyase, mitochondrial	CLYBL_HUMAN	23	-74.7229	0.252771	cancer
cancer / NAT	Q6ZMM2;Q6ZMM2-2	Q6ZMM2;Q6ZMM2-2	Q6ZMM2	-3.64974	3.64974	4.54417e-16	72	Q6ZMM2;Q6ZMM2-2	ADAMTSL5	ADAMTS-like protein 5;Isoform 2 of ADAMTS-like protein 5	ATL5_HUMAN	17	-92.0326	0.0796743	cancer
cancer / NAT	Q5K4L6	Q5K4L6	Q5K4L6	-1.39634	1.39634	4.55161e-16	90	Q5K4L6	SLC27A3	Long-chain fatty acid transport protein 3	S27A3_HUMAN	26	-62.0108	0.379892	cancer
cancer / NAT	P26440	P26440	P26440	-1.14452	1.14452	4.64718e-16	129	P26440	IVD	Isovaleryl-CoA dehydrogenase, mitochondrial	IVD_HUMAN	24	-54.7659	0.452341	cancer
cancer / NAT	P30040	P30040	P30040	-0.410265	0.410265	4.76015e-16	135	P30040	ERP29	Endoplasmic reticulum resident protein 29	ERP29_HUMAN	23	-24.7515	0.752485	cancer
cancer / NAT	P21953	P21953	P21953	-0.925285	0.925285	4.84324e-16	48	P21953	BCKDHB	2-oxoisovalerate dehydrogenase subunit beta, mitochondrial	ODBB_HUMAN	14	-47.3423	0.526577	cancer
cancer / NAT	Q8TDX7	Q8TDX7	Q8TDX7	-0.847634	0.847634	4.89468e-16	69	Q8TDX7	NEK7	Serine/threonine-protein kinase Nek7	NEK7_HUMAN	19	-44.4305	0.555695	cancer
cancer / NAT	P61326	P61326	P61326	1.03764	1.03764	4.89468e-16	90	P61326	MAGOH	Protein mago nashi homolog	MGN_HUMAN	18	105.287	2.05287	cancer
cancer / NAT	Q9Y2T2	Q9Y2T2	Q9Y2T2	-0.722121	0.722121	5.01068e-16	69	Q9Y2T2	AP3M1	AP-3 complex subunit mu-1	AP3M1_HUMAN	17	-39.3794	0.606206	cancer
cancer / NAT	Q8N335	Q8N335	Q8N335	-1.96915	1.96915	5.05194e-16	105	Q8N335	GPD1L	Glycerol-3-phosphate dehydrogenase 1-like protein	GPD1L_HUMAN	27	-74.4597	0.255403	cancer
cancer / NAT	Q12788	Q12788	Q12788	1.4372	1.4372	5.13617e-16	192	Q12788	TBL3	Transducin beta-like protein 3	TBL3_HUMAN	45	170.794	2.70794	cancer
cancer / NAT	Q14108	Q14108	Q14108	-1.62165	1.62165	5.42631e-16	84	Q14108	SCARB2	Lysosome membrane protein 2	SCRB2_HUMAN	18	-67.5037	0.324963	cancer
cancer / NAT	Q6UWY5	Q6UWY5	Q6UWY5	-1.82944	1.82944	5.50642e-16	111	Q6UWY5	OLFML1	Olfactomedin-like protein 1	OLFL1_HUMAN	24	-71.8627	0.281373	cancer
cancer / NAT	P08185	P08185	P08185	-1.71739	1.71739	6.2462e-16	45	P08185	SERPINA6	Corticosteroid-binding globulin	CBG_HUMAN	13	-69.5901	0.304099	cancer
cancer / NAT	P49327	P49327	P49327	-0.152443	0.152443	6.25437e-16	675	P49327	FASN	Fatty acid synthase	FAS_HUMAN	149	-10.0274	0.899726	cancer
cancer / NAT	P00740	P00740	P00740	-1.3577	1.3577	6.25437e-16	72	P00740	F9	Coagulation factor IX	FA9_HUMAN	19	-60.9795	0.390205	cancer
cancer / NAT	Q9NR46	Q9NR46	Q9NR46	-0.468472	0.468472	6.35814e-16	87	Q9NR46	SH3GLB2	Endophilin-B2	SHLB2_HUMAN	20	-27.7271	0.722729	cancer
cancer / NAT	P33316-2	P33316-2	P33316	1.60228	1.60228	6.40613e-16	78	P33316-2	DUT	Isoform 2 of Deoxyuridine 5'-triphosphate nucleotidohydrolase, mitochondrial	DUT_HUMAN	13	203.622	3.03622	cancer
cancer / NAT	Q9NQ29	Q9NQ29	Q9NQ29	1.52094	1.52094	6.85297e-16	114	Q9NQ29	LUC7L	Putative RNA-binding protein Luc7-like 1	LUC7L_HUMAN	29	186.979	2.86979	cancer
cancer / NAT	P09525	P09525	P09525	-1.69432	1.69432	6.96882e-16	150	P09525	ANXA4	Annexin A4	ANXA4_HUMAN	31	-69.0999	0.309001	cancer
cancer / NAT	O75170-2;O75170-3;O75170-4;O75170-5	O75170-2;O75170-3;O75170-4;O75170-5	O75170	-1.42515	1.42515	7.05382e-16	93	O75170-2;O75170-3;O75170-4;O75170-5	PPP6R2	Isoform 2 of Serine/threonine-protein phosphatase 6 regulatory subunit 2;Isoform 3 of Serine/threonine-protein phosphatase 6 regulatory subunit 2;Isoform 4 of Serine/threonine-protein phosphatase 6 regulatory subunit 2;Isoform 5 of Serine/threonine-protein phosphatase 6 regulatory subunit 2	PP6R2_HUMAN	25	-62.762	0.37238	cancer
cancer / NAT	Q9H008	Q9H008	Q9H008	-1.55443	1.55443	7.06051e-16	66	Q9H008	LHPP	Phospholysine phosphohistidine inorganic pyrophosphate phosphatase	LHPP_HUMAN	12	-65.9537	0.340463	cancer
cancer / NAT	Q9P2M7	Q9P2M7	Q9P2M7	-1.24384	1.24384	7.40881e-16	159	Q9P2M7	CGN	Cingulin	CING_HUMAN	65	-57.7752	0.422248	cancer
cancer / NAT	P42858	P42858	P42858	-0.631913	0.631913	7.68722e-16	354	P42858	HTT	Huntingtin	HD_HUMAN	121	-35.468	0.64532	cancer
cancer / NAT	Q9P265	Q9P265	Q9P265	-0.769092	0.769092	7.81305e-16	138	Q9P265	DIP2B	Disco-interacting protein 2 homolog B	DIP2B_HUMAN	62	-41.3213	0.586787	cancer
cancer / NAT	Q9BPX3	Q9BPX3	Q9BPX3	1.79414	1.79414	7.91126e-16	129	Q9BPX3	NCAPG	Condensin complex subunit 3	CND3_HUMAN	46	246.808	3.46808	cancer
cancer / NAT	Q2Q1W2	Q2Q1W2	Q2Q1W2	1.76832	1.76832	7.98453e-16	168	Q2Q1W2	TRIM71	E3 ubiquitin-protein ligase TRIM71	LIN41_HUMAN	45	240.656	3.40656	cancer
cancer / NAT	P06865	P06865	P06865	-1.06348	1.06348	8.10139e-16	114	P06865	HEXA	Beta-hexosaminidase subunit alpha	HEXA_HUMAN	25	-52.1525	0.478475	cancer
cancer / NAT	Q14012	Q14012	Q14012	-2.92549	2.92549	8.2478e-16	72	Q14012	CAMK1	Calcium/calmodulin-dependent protein kinase type 1	KCC1A_HUMAN	16	-86.8374	0.131626	cancer
cancer / NAT	Q13123	Q13123	Q13123	1.18947	1.18947	8.76104e-16	165	Q13123	IK	Protein Red	RED_HUMAN	38	128.069	2.28069	cancer
cancer / NAT	Q15061	Q15061	Q15061	1.06975	1.06975	8.95708e-16	159	Q15061	WDR43	WD repeat-containing protein 43	WDR43_HUMAN	40	109.907	2.09907	cancer
cancer / NAT	Q9NV88	Q9NV88	Q9NV88	1.2998	1.2998	9.05284e-16	111	Q9NV88	INTS9	Integrator complex subunit 9	INT9_HUMAN	32	146.194	2.46194	cancer
cancer / NAT	Q92796-2	Q92796-2	Q92796	2.00991	2.00991	9.09606e-16	105	Q92796-2	DLG3	Isoform 2 of Disks large homolog 3	DLG3_HUMAN	25	302.756	4.02756	cancer
cancer / NAT	Q9NSD9	Q9NSD9	Q9NSD9	1.17917	1.17917	9.16313e-16	225	Q9NSD9	FARSB	Phenylalanine--tRNA ligase beta subunit	SYFB_HUMAN	43	126.446	2.26446	cancer
cancer / NAT	Q9UBL3-3	Q9UBL3-3	Q9UBL3	1.12747	1.12747	9.3907e-16	153	Q9UBL3-3	ASH2L	Isoform 3 of Set1/Ash2 histone methyltransferase complex subunit ASH2	ASH2L_HUMAN	33	118.475	2.18475	cancer
cancer / NAT	P51003	P51003	P51003	1.03259	1.03259	9.39893e-16	156	P51003	PAPOLA	Poly(A) polymerase alpha	PAPOA_HUMAN	42	104.569	2.04569	cancer
cancer / NAT	P11182	P11182	P11182	-1.27387	1.27387	9.43459e-16	126	P11182	DBT	Lipoamide acyltransferase component of branched-chain alpha-keto acid dehydrogenase complex, mitochondrial	ODB2_HUMAN	32	-58.6451	0.413549	cancer
cancer / NAT	P29466;P29466-2	P29466;P29466-2	P29466	0.684087	0.684087	9.59827e-16	108	P29466;P29466-2	CASP1	Caspase-1;Isoform Beta of Caspase-1	CASP1_HUMAN	24	60.6685	1.60669	cancer
cancer / NAT	P78524	P78524	P78524	-1.0105	1.0105	1.00702e-15	81	P78524	ST5	Suppression of tumorigenicity 5 protein	ST5_HUMAN	38	-50.3625	0.496375	cancer
cancer / NAT	Q8IY81	Q8IY81	Q8IY81	0.835949	0.835949	1.04683e-15	162	Q8IY81	FTSJ3	pre-rRNA processing protein FTSJ3	SPB1_HUMAN	44	78.503	1.78503	cancer
cancer / NAT	Q6PCB0	Q6PCB0	Q6PCB0	-0.700667	0.700667	1.0603e-15	111	Q6PCB0	VWA1	von Willebrand factor A domain-containing protein 1	VWA1_HUMAN	24	-38.4712	0.615288	cancer
cancer / NAT	Q14520;Q14520-2	Q14520;Q14520-2	Q14520	-1.83841	1.83841	1.11209e-15	99	Q14520;Q14520-2	HABP2	Hyaluronan-binding protein 2;Isoform 2 of Hyaluronan-binding protein 2	HABP2_HUMAN	23	-72.037	0.27963	cancer
cancer / NAT	O14929	O14929	O14929	2.38978	2.38978	1.11673e-15	78	O14929	HAT1	Histone acetyltransferase type B catalytic subunit	HAT1_HUMAN	21	424.079	5.24079	cancer
cancer / NAT	O15226;O15226-2	O15226;O15226-2	O15226	2.14032	2.14032	1.11808e-15	141	O15226;O15226-2	NKRF	NF-kappa-B-repressing factor;Isoform 2 of NF-kappa-B-repressing factor	NKRF_HUMAN	49	340.86	4.4086	cancer
cancer / NAT	Q9UMS4	Q9UMS4	Q9UMS4	0.86122	0.86122	1.13011e-15	159	Q9UMS4	PRPF19	Pre-mRNA-processing factor 19	PRP19_HUMAN	26	81.6574	1.81657	cancer
cancer / NAT	Q9NTZ6	Q9NTZ6	Q9NTZ6	1.06587	1.06587	1.13535e-15	144	Q9NTZ6	RBM12	RNA-binding protein 12	RBM12_HUMAN	33	109.343	2.09343	cancer
cancer / NAT	Q9BTX1;Q9BTX1-2;Q9BTX1-5	Q9BTX1;Q9BTX1-2;Q9BTX1-5	Q9BTX1	0.850499	0.850499	1.13713e-15	78	Q9BTX1;Q9BTX1-2;Q9BTX1-5	NDC1	Nucleoporin NDC1;Isoform 2 of Nucleoporin NDC1;Isoform 5 of Nucleoporin NDC1	NDC1_HUMAN	24	80.3125	1.80312	cancer
cancer / NAT	Q9BQ39	Q9BQ39	Q9BQ39	1.17369	1.17369	1.18119e-15	156	Q9BQ39	DDX50	ATP-dependent RNA helicase DDX50	DDX50_HUMAN	46	125.588	2.25588	cancer
cancer / NAT	Q05682	Q05682	Q05682	-0.720906	0.720906	1.19882e-15	468	Q05682	CALD1	Caldesmon	CALD1_HUMAN	96	-39.3284	0.606716	cancer
cancer / NAT	Q03252	Q03252	Q03252	-1.20029	1.20029	1.23109e-15	303	Q03252	LMNB2	Lamin-B2	LMNB2_HUMAN	62	-56.4813	0.435187	cancer
cancer / NAT	Q9BZE1	Q9BZE1	Q9BZE1	0.989108	0.989108	1.23582e-15	111	Q9BZE1	MRPL37	39S ribosomal protein L37, mitochondrial	RM37_HUMAN	30	98.4958	1.98496	cancer
cancer / NAT	Q2NKX8	Q2NKX8	Q2NKX8	0.636597	0.636597	1.28129e-15	168	Q2NKX8	ERCC6L	DNA excision repair protein ERCC-6-like	ERC6L_HUMAN	64	55.4658	1.55466	cancer
cancer / NAT	Q0VDF9	Q0VDF9	Q0VDF9	0.74631	0.74631	1.28488e-15	93	Q0VDF9	HSPA14	Heat shock 70 kDa protein 14	HSP7E_HUMAN	29	67.7496	1.6775	cancer
cancer / NAT	Q14684	Q14684	Q14684	0.775734	0.775734	1.3079e-15	174	Q14684	RRP1B	Ribosomal RNA processing protein 1 homolog B	RRP1B_HUMAN	44	71.2061	1.71206	cancer
cancer / NAT	P26583	P26583	P26583	2.14278	2.14278	1.31619e-15	153	P26583	HMGB2	High mobility group protein B2	HMGB2_HUMAN	23	341.613	4.41613	cancer
cancer / NAT	Q96I25	Q96I25	Q96I25	1.40346	1.40346	1.42065e-15	135	Q96I25	RBM17	Splicing factor 45	SPF45_HUMAN	30	164.536	2.64536	cancer
cancer / NAT	O95445	O95445	O95445	-1.81463	1.81463	1.4572e-15	48	O95445	APOM	Apolipoprotein M	APOM_HUMAN	10	-71.5723	0.284277	cancer
cancer / NAT	Q9BYG3	Q9BYG3	Q9BYG3	1.05905	1.05905	1.47677e-15	84	Q9BYG3	NIFK	MKI67 FHA domain-interacting nucleolar phosphoprotein	MK67I_HUMAN	22	108.355	2.08355	cancer
cancer / NAT	Q96RQ9;Q96RQ9-2	Q96RQ9;Q96RQ9-2	Q96RQ9	1.89622	1.89622	1.50365e-15	93	Q96RQ9;Q96RQ9-2	IL4I1	L-amino-acid oxidase;Isoform 2 of L-amino-acid oxidase	OXLA_HUMAN	26	272.236	3.72236	cancer
cancer / NAT	O76070	O76070	O76070	-2.29367	2.29367	1.51635e-15	69	O76070	SNCG	Gamma-synuclein	SYUG_HUMAN	14	-79.6044	0.203956	cancer
cancer / NAT	Q9BQ52	Q9BQ52	Q9BQ52	0.915874	0.915874	1.53823e-15	219	Q9BQ52	ELAC2	Zinc phosphodiesterase ELAC protein 2	RNZ2_HUMAN	50	88.6711	1.88671	cancer
cancer / NAT	Q9NT22	Q9NT22	Q9NT22	-3.19894	3.19894	1.62586e-15	69	Q9NT22	EMILIN3	EMILIN-3	EMIL3_HUMAN	31	-89.1101	0.108899	cancer
cancer / NAT	P17661	P17661	P17661	-1.28868	1.28868	1.64291e-15	207	P17661	DES	Desmin	DESM_HUMAN	44	-59.0675	0.409325	cancer
cancer / NAT	P42574	P42574	P42574	1.48301	1.48301	1.81617e-15	69	P42574	CASP3	Caspase-3	CASP3_HUMAN	22	179.53	2.7953	cancer
cancer / NAT	Q99715	Q99715	Q99715	0.145416	0.145416	1.84536e-15	348	Q99715	COL12A1	Collagen alpha-1(XII) chain	COCA1_HUMAN	133	10.605	1.10605	cancer
cancer / NAT	Q9ULP0-3;Q9ULP0-6	Q9ULP0-3;Q9ULP0-6	Q9ULP0	-4.20513	4.20513	1.88413e-15	60	Q9ULP0-3;Q9ULP0-6	NDRG4	Isoform 3 of Protein NDRG4;Isoform 6 of Protein NDRG4	NDRG4_HUMAN	16	-94.5784	0.0542162	cancer
cancer / NAT	Q9HBK9	Q9HBK9	Q9HBK9	-2.77426	2.77426	1.91781e-15	69	Q9HBK9	AS3MT	Arsenite methyltransferase	AS3MT_HUMAN	28	-85.3828	0.146172	cancer
cancer / NAT	Q8N0X7	Q8N0X7	Q8N0X7	-1.31281	1.31281	2.03784e-15	81	Q8N0X7	SPART	Spartin	SPART_HUMAN	25	-59.7465	0.402535	cancer
cancer / NAT	O75828	O75828	O75828	-0.982635	0.982635	2.05785e-15	90	O75828	CBR3	Carbonyl reductase [NADPH] 3	CBR3_HUMAN	19	-49.3945	0.506055	cancer
cancer / NAT	Q9UKS6	Q9UKS6	Q9UKS6	-1.24287	1.24287	2.08834e-15	45	Q9UKS6	PACSIN3	Protein kinase C and casein kinase substrate in neurons protein 3	PACN3_HUMAN	18	-57.7467	0.422533	cancer
cancer / NAT	Q9UJV9	Q9UJV9	Q9UJV9	1.10648	1.10648	2.20613e-15	159	Q9UJV9	DDX41	Probable ATP-dependent RNA helicase DDX41	DDX41_HUMAN	52	115.319	2.15319	cancer
cancer / NAT	Q9BRF8	Q9BRF8	Q9BRF8	-1.15582	1.15582	2.24649e-15	108	Q9BRF8	CPPED1	Serine/threonine-protein phosphatase CPPED1	CPPED_HUMAN	23	-55.119	0.44881	cancer
cancer / NAT	Q15269	Q15269	Q15269	1.51553	1.51553	2.29507e-15	153	Q15269	PWP2	Periodic tryptophan protein 2 homolog	PWP2_HUMAN	41	185.904	2.85904	cancer
cancer / NAT	O95639-3	O95639-3	O95639	1.06836	1.06836	2.30129e-15	51	O95639-3	CPSF4	Isoform 3 of Cleavage and polyadenylation specificity factor subunit 4	CPSF4_HUMAN	17	109.705	2.09705	cancer
cancer / NAT	Q14353	Q14353	Q14353	-3.00148	3.00148	2.32221e-15	81	Q14353	GAMT	Guanidinoacetate N-methyltransferase	GAMT_HUMAN	14	-87.5128	0.124872	cancer
cancer / NAT	Q8NHP8	Q8NHP8	Q8NHP8	-0.893289	0.893289	2.39983e-15	72	Q8NHP8	PLBD2	Putative phospholipase B-like 2	PLBL2_HUMAN	19	-46.1615	0.538385	cancer
cancer / NAT	Q9UQ88	Q9UQ88	Q9UQ88	1.29628	1.29628	2.40267e-15	192	Q9UQ88	CDK11A	Cyclin-dependent kinase 11A	CD11A_HUMAN	47	145.596	2.45596	cancer
cancer / NAT	O14979-2;O14979-3	O14979-2;O14979-3	O14979	1.13172	1.13172	2.40487e-15	129	O14979-2;O14979-3	HNRNPDL	Isoform 2 of Heterogeneous nuclear ribonucleoprotein D-like;Isoform 3 of Heterogeneous nuclear ribonucleoprotein D-like	HNRDL_HUMAN	21	119.12	2.1912	cancer
cancer / NAT	Q9NR56-2;Q9NR56-5;Q9NR56-6	Q9NR56-2;Q9NR56-5;Q9NR56-6	Q9NR56	-0.751079	0.751079	2.50938e-15	45	Q9NR56-2;Q9NR56-5;Q9NR56-6	MBNL1	Isoform 2 of Muscleblind-like protein 1;Isoform 5 of Muscleblind-like protein 1;Isoform 6 of Muscleblind-like protein 1	MBNL1_HUMAN	9	-40.5841	0.594159	cancer
cancer / NAT	Q86TM6;Q86TM6-3	Q86TM6;Q86TM6-3	Q86TM6	-0.998475	0.998475	2.51928e-15	51	Q86TM6;Q86TM6-3	SYVN1	E3 ubiquitin-protein ligase synoviolin;Isoform 3 of E3 ubiquitin-protein ligase synoviolin	SYVN1_HUMAN	12	-49.9471	0.500529	cancer
cancer / NAT	P28290	P28290	P28290	-2.30178	2.30178	2.59929e-15	96	P28290	SSFA2	Sperm-specific antigen 2	SSFA2_HUMAN	51	-79.7187	0.202813	cancer
cancer / NAT	Q9BVJ6	Q9BVJ6	Q9BVJ6	1.39681	1.39681	2.66758e-15	180	Q9BVJ6	UTP14A	U3 small nucleolar RNA-associated protein 14 homolog A	UT14A_HUMAN	53	163.318	2.63318	cancer
cancer / NAT	P52756	P52756	P52756	1.15346	1.15346	2.73381e-15	150	P52756	RBM5	RNA-binding protein 5	RBM5_HUMAN	46	122.447	2.22447	cancer
cancer / NAT	Q92692	Q92692	Q92692	-2.73362	2.73362	2.76955e-15	78	Q92692	NECTIN2	Nectin-2	NECT2_HUMAN	20	-84.9652	0.150348	cancer
cancer / NAT	Q15424;Q15424-3;Q15424-4	Q15424;Q15424-3;Q15424-4	Q15424	1.09819	1.09819	2.80727e-15	207	Q15424;Q15424-3;Q15424-4	SAFB	Scaffold attachment factor B1;Isoform 3 of Scaffold attachment factor B1;Isoform 4 of Scaffold attachment factor B1	SAFB1_HUMAN	42	114.086	2.14086	cancer
cancer / NAT	P04264	P04264	P04264	-0.497177	0.497177	2.88444e-15	201	P04264	KRT1	Keratin, type II cytoskeletal 1	K2C1_HUMAN	44	-29.1508	0.708492	cancer
cancer / NAT	A3KMH1;A3KMH1-3	A3KMH1;A3KMH1-3	A3KMH1	-0.79653	0.79653	3.11466e-15	159	A3KMH1;A3KMH1-3	VWA8	von Willebrand factor A domain-containing protein 8;Isoform 3 of von Willebrand factor A domain-containing protein 8	VWA8_HUMAN	81	-42.4268	0.575732	cancer
cancer / NAT	P13861	P13861	P13861	-1.15823	1.15823	3.16957e-15	147	P13861	PRKAR2A	cAMP-dependent protein kinase type II-alpha regulatory subunit	KAP2_HUMAN	30	-55.194	0.44806	cancer
cancer / NAT	Q5T6V5	Q5T6V5	Q5T6V5	-0.982238	0.982238	3.31418e-15	96	Q5T6V5	C9orf64	Queuosine salvage protein	QSPP_HUMAN	27	-49.3806	0.506194	cancer
cancer / NAT	O14561	O14561	O14561	1.17964	1.17964	3.55167e-15	78	O14561	NDUFAB1	Acyl carrier protein, mitochondrial	ACPM_HUMAN	7	126.52	2.2652	cancer
cancer / NAT	P06681;P06681-3	P06681;P06681-3	P06681	-1.74374	1.74374	3.64221e-15	108	P06681;P06681-3	C2	Complement C2;Isoform 3 of Complement C2	CO2_HUMAN	27	-70.1406	0.298594	cancer
cancer / NAT	Q68CQ4	Q68CQ4	Q68CQ4	1.58073	1.58073	3.66247e-15	117	Q68CQ4	DIEXF	Digestive organ expansion factor homolog	DIEXF_HUMAN	40	199.122	2.99122	cancer
cancer / NAT	Q9H9B4	Q9H9B4	Q9H9B4	-1.05917	1.05917	3.69892e-15	90	Q9H9B4	SFXN1	Sideroflexin-1	SFXN1_HUMAN	16	-52.0092	0.479908	cancer
cancer / NAT	P0DPB6	P0DPB6	P0DPB6	1.3267	1.3267	3.81567e-15	39	P0DPB6	POLR1D	DNA-directed RNA polymerases I and III subunit RPAC2	RPAC2_HUMAN	8	150.828	2.50828	cancer
cancer / NAT	Q8TDQ7	Q8TDQ7	Q8TDQ7	-1.24377	1.24377	3.86413e-15	99	Q8TDQ7	GNPDA2	Glucosamine-6-phosphate isomerase 2	GNPI2_HUMAN	20	-57.7731	0.422269	cancer
cancer / NAT	P80303	P80303	P80303	-1.35115	1.35115	3.91045e-15	174	P80303	NUCB2	Nucleobindin-2	NUCB2_HUMAN	40	-60.802	0.39198	cancer
cancer / NAT	Q9Y3B8	Q9Y3B8	Q9Y3B8	-1.51579	1.51579	4.00855e-15	45	Q9Y3B8	REXO2	Oligoribonuclease, mitochondrial	ORN_HUMAN	13	-65.0295	0.349705	cancer
cancer / NAT	Q7Z5K2;Q7Z5K2-2;Q7Z5K2-3	Q7Z5K2;Q7Z5K2-2;Q7Z5K2-3	Q7Z5K2	0.922859	0.922859	4.18628e-15	240	Q7Z5K2;Q7Z5K2-2;Q7Z5K2-3	WAPL	Wings apart-like protein homolog;Isoform 2 of Wings apart-like protein homolog;Isoform 3 of Wings apart-like protein homolog	WAPL_HUMAN	73	89.5869	1.89587	cancer
cancer / NAT	Q9UIA9	Q9UIA9	Q9UIA9	0.521164	0.521164	4.20819e-15	243	Q9UIA9	XPO7	Exportin-7	XPO7_HUMAN	59	43.5113	1.43511	cancer
cancer / NAT	P17813	P17813	P17813	-2.64434	2.64434	4.3641e-15	81	P17813	ENG	Endoglin	EGLN_HUMAN	25	-84.0054	0.159946	cancer
cancer / NAT	Q16555-2	Q16555-2	Q16555	-0.578281	0.578281	4.50338e-15	264	Q16555-2	DPYSL2	Isoform 2 of Dihydropyrimidinase-related protein 2	DPYL2_HUMAN	38	-33.0239	0.669761	cancer
cancer / NAT	O76031	O76031	O76031	0.743692	0.743692	4.50531e-15	147	O76031	CLPX	ATP-dependent Clp protease ATP-binding subunit clpX-like, mitochondrial	CLPX_HUMAN	41	67.4456	1.67446	cancer
cancer / NAT	Q8TB96	Q8TB96	Q8TB96	-1.73838	1.73838	4.51782e-15	39	Q8TB96	ITFG1	T-cell immunomodulatory protein	TIP_HUMAN	10	-70.0293	0.299707	cancer
cancer / NAT	O43488	O43488	O43488	-1.40344	1.40344	4.63812e-15	102	O43488	AKR7A2	Aflatoxin B1 aldehyde reductase member 2	ARK72_HUMAN	20	-62.1972	0.378028	cancer
cancer / NAT	P03952	P03952	P03952	-2.35366	2.35366	4.71107e-15	135	P03952	KLKB1	Plasma kallikrein	KLKB1_HUMAN	35	-80.4351	0.195649	cancer
cancer / NAT	Q6P4A8	Q6P4A8	Q6P4A8	1.50751	1.50751	4.71274e-15	120	Q6P4A8	PLBD1	Phospholipase B-like 1	PLBL1_HUMAN	29	184.319	2.84319	cancer
cancer / NAT	P29536;P29536-2	P29536;P29536-2	P29536	-2.30516	2.30516	4.90682e-15	102	P29536;P29536-2	LMOD1	Leiomodin-1;Isoform 2 of Leiomodin-1	LMOD1_HUMAN	29	-79.7662	0.202338	cancer
cancer / NAT	Q01085-2	Q01085-2	Q01085	0.888676	0.888676	5.13365e-15	66	Q01085-2	TIAL1	Isoform 2 of Nucleolysin TIAR	TIAR_HUMAN	14	85.1476	1.85148	cancer
cancer / NAT	Q12857-2	Q12857-2	Q12857	-2.42161	2.42161	5.36333e-15	75	Q12857-2	NFIA	Isoform 2 of Nuclear factor 1 A-type	NFIA_HUMAN	25	-81.3352	0.186648	cancer
cancer / NAT	Q8N3U4-2	Q8N3U4-2	Q8N3U4	0.658651	0.658651	5.48924e-15	150	Q8N3U4-2	STAG2	Isoform 2 of Cohesin subunit SA-2	STAG2_HUMAN	59	57.8605	1.57861	cancer
cancer / NAT	P78330	P78330	P78330	1.56508	1.56508	5.52148e-15	51	P78330	PSPH	Phosphoserine phosphatase	SERB_HUMAN	14	195.893	2.95893	cancer
cancer / NAT	Q9UKE5;Q9UKE5-2	Q9UKE5;Q9UKE5-2	Q9UKE5	-3.00689	3.00689	5.64115e-15	90	Q9UKE5;Q9UKE5-2	TNIK	TRAF2 and NCK-interacting protein kinase;Isoform 2 of TRAF2 and NCK-interacting protein kinase	TNIK_HUMAN	28	-87.5596	0.124404	cancer
cancer / NAT	Q15287	Q15287	Q15287	1.15168	1.15168	5.69842e-15	78	Q15287	RNPS1	RNA-binding protein with serine-rich domain 1	RNPS1_HUMAN	12	122.172	2.22172	cancer
cancer / NAT	Q6NYC8	Q6NYC8	Q6NYC8	1.20413	1.20413	5.85569e-15	108	Q6NYC8	PPP1R18	Phostensin	PPR18_HUMAN	31	130.399	2.30399	cancer
cancer / NAT	Q9NUQ3	Q9NUQ3	Q9NUQ3	1.04087	1.04087	5.94829e-15	153	Q9NUQ3	TXLNG	Gamma-taxilin	TXLNG_HUMAN	37	105.747	2.05747	cancer
cancer / NAT	Q96S66	Q96S66	Q96S66	-1.23083	1.23083	6.03126e-15	105	Q96S66	CLCC1	Chloride channel CLIC-like protein 1	CLCC1_HUMAN	28	-57.3929	0.426071	cancer
cancer / NAT	P42224-2	P42224-2	P42224	1.13325	1.13325	6.15985e-15	306	P42224-2	STAT1	Isoform Beta of Signal transducer and activator of transcription 1-alpha/beta	STAT1_HUMAN	61	119.353	2.19353	cancer
cancer / NAT	P41240	P41240	P41240	0.762965	0.762965	6.24555e-15	138	P41240	CSK	Tyrosine-protein kinase CSK	CSK_HUMAN	28	69.6974	1.69697	cancer
cancer / NAT	P42768	P42768	P42768	1.41931	1.41931	6.292e-15	75	P42768	WAS	Wiskott-Aldrich syndrome protein	WASP_HUMAN	21	167.457	2.67457	cancer
cancer / NAT	Q96SQ9	Q96SQ9	Q96SQ9	2.63955	2.63955	6.33865e-15	114	Q96SQ9	CYP2S1	Cytochrome P450 2S1	CP2S1_HUMAN	34	523.136	6.23136	cancer
cancer / NAT	Q15047;Q15047-3	Q15047;Q15047-3	Q15047	0.609169	0.609169	6.49932e-15	144	Q15047;Q15047-3	SETDB1	Histone-lysine N-methyltransferase SETDB1;Isoform 3 of Histone-lysine N-methyltransferase SETDB1	SETB1_HUMAN	49	52.5381	1.52538	cancer
cancer / NAT	Q9BSJ8-2	Q9BSJ8-2	Q9BSJ8	-0.87281	0.87281	6.63277e-15	231	Q9BSJ8-2	ESYT1	Isoform 2 of Extended synaptotagmin-1	ESYT1_HUMAN	62	-45.3918	0.546082	cancer
cancer / NAT	Q5HYI8	Q5HYI8	Q5HYI8	-1.62276	1.62276	6.65727e-15	48	Q5HYI8	RABL3	Rab-like protein 3	RABL3_HUMAN	16	-67.5286	0.324714	cancer
cancer / NAT	P17252	P17252	P17252	-2.92995	2.92995	6.684e-15	72	P17252	PRKCA	Protein kinase C alpha type	KPCA_HUMAN	25	-86.8781	0.131219	cancer
cancer / NAT	P13489	P13489	P13489	-0.675055	0.675055	7.09927e-15	186	P13489	RNH1	Ribonuclease inhibitor	RINI_HUMAN	32	-37.3692	0.626308	cancer
cancer / NAT	O95487;O95487-2;O95487-3	O95487;O95487-2;O95487-3	O95487	-1.30232	1.30232	7.49834e-15	150	O95487;O95487-2;O95487-3	SEC24B	Protein transport protein Sec24B;Isoform 2 of Protein transport protein Sec24B;Isoform 3 of Protein transport protein Sec24B	SC24B_HUMAN	36	-59.4528	0.405472	cancer
cancer / NAT	Q9NYL2-2	Q9NYL2-2	Q9NYL2	-1.69615	1.69615	8.40926e-15	51	Q9NYL2-2	MAP3K20	Isoform 2 of Mitogen-activated protein kinase kinase kinase 20	M3K20_HUMAN	16	-69.1391	0.308609	cancer
cancer / NAT	Q8NE71	Q8NE71	Q8NE71	1.07209	1.07209	8.70715e-15	261	Q8NE71	ABCF1	ATP-binding cassette sub-family F member 1	ABCF1_HUMAN	61	110.247	2.10247	cancer
cancer / NAT	P82979	P82979	P82979	1.20963	1.20963	8.86486e-15	81	P82979	SARNP	SAP domain-containing ribonucleoprotein	SARNP_HUMAN	21	131.278	2.31278	cancer
cancer / NAT	Q99523	Q99523	Q99523	-2.96144	2.96144	8.92197e-15	87	Q99523	SORT1	Sortilin	SORT_HUMAN	28	-87.1614	0.128386	cancer
cancer / NAT	Q5T9A4	Q5T9A4	Q5T9A4	1.30471	1.30471	9.08973e-15	156	Q5T9A4	ATAD3B	ATPase family AAA domain-containing protein 3B	ATD3B_HUMAN	42	147.034	2.47034	cancer
cancer / NAT	P52790	P52790	P52790	1.12405	1.12405	9.85727e-15	87	P52790	HK3	Hexokinase-3	HXK3_HUMAN	30	117.958	2.17958	cancer
cancer / NAT	Q9UMN6	Q9UMN6	Q9UMN6	1.19035	1.19035	9.87838e-15	162	Q9UMN6	KMT2B	Histone-lysine N-methyltransferase 2B	KMT2B_HUMAN	83	128.208	2.28208	cancer
cancer / NAT	O43866	O43866	O43866	-1.54027	1.54027	1.04932e-14	33	O43866	CD5L	CD5 antigen-like	CD5L_HUMAN	14	-65.6178	0.343822	cancer
cancer / NAT	P15153	P15153	P15153	1.63312	1.63312	1.0644e-14	36	P15153	RAC2	Ras-related C3 botulinum toxin substrate 2	RAC2_HUMAN	6	210.182	3.10182	cancer
cancer / NAT	Q9Y618;Q9Y618-3;Q9Y618-4;Q9Y618-5	Q9Y618;Q9Y618-3;Q9Y618-4;Q9Y618-5	Q9Y618	-0.506708	0.506708	1.1502e-14	81	Q9Y618;Q9Y618-3;Q9Y618-4;Q9Y618-5	NCOR2	Nuclear receptor corepressor 2;Isoform 3 of Nuclear receptor corepressor 2;Isoform 4 of Nuclear receptor corepressor 2;Isoform 5 of Nuclear receptor corepressor 2	NCOR2_HUMAN	41	-29.6174	0.703826	cancer
cancer / NAT	Q9P0K7	Q9P0K7	Q9P0K7	-1.24613	1.24613	1.24244e-14	189	Q9P0K7	RAI14	Ankycorbin	RAI14_HUMAN	63	-57.8423	0.421577	cancer
cancer / NAT	Q9UIG0;Q9UIG0-2	Q9UIG0;Q9UIG0-2	Q9UIG0	0.525328	0.525328	1.2814e-14	369	Q9UIG0;Q9UIG0-2	BAZ1B	Tyrosine-protein kinase BAZ1B;Isoform 2 of Tyrosine-protein kinase BAZ1B	BAZ1B_HUMAN	105	43.9261	1.43926	cancer
cancer / NAT	Q9H4L7-2	Q9H4L7-2	Q9H4L7	1.17562	1.17562	1.3028e-14	159	Q9H4L7-2	SMARCAD1	Isoform 2 of SWI/SNF-related matrix-associated actin-dependent regulator of chromatin subfamily A containing DEAD/H box 1	SMRCD_HUMAN	53	125.891	2.25891	cancer
cancer / NAT	P28676	P28676	P28676	0.456004	0.456004	1.38201e-14	78	P28676	GCA	Grancalcin	GRAN_HUMAN	14	37.1737	1.37174	cancer
cancer / NAT	Q15154-2	Q15154-2	Q15154	0.431344	0.431344	1.39247e-14	324	Q15154-2	PCM1	Isoform 2 of Pericentriolar material 1 protein	PCM1_HUMAN	99	34.8489	1.34849	cancer
cancer / NAT	Q15398	Q15398	Q15398	1.30903	1.30903	1.43925e-14	135	Q15398	DLGAP5	Disks large-associated protein 5	DLGP5_HUMAN	40	147.775	2.47775	cancer
cancer / NAT	P11498	P11498	P11498	-1.69662	1.69662	1.45415e-14	141	P11498	PC	Pyruvate carboxylase, mitochondrial	PYC_HUMAN	49	-69.1492	0.308508	cancer
cancer / NAT	P00390;P00390-2	P00390;P00390-2	P00390	-0.92811	0.92811	1.46482e-14	120	P00390;P00390-2	GSR	Glutathione reductase, mitochondrial;Isoform Cytoplasmic of Glutathione reductase, mitochondrial	GSHR_HUMAN	31	-47.4454	0.525546	cancer
cancer / NAT	P08311	P08311	P08311	-3.60409	3.60409	1.46736e-14	66	P08311	CTSG	Cathepsin G	CATG_HUMAN	17	-91.7764	0.0822359	cancer
cancer / NAT	Q9BQG0;Q9BQG0-2	Q9BQG0;Q9BQG0-2	Q9BQG0	0.95223	0.95223	1.50979e-14	312	Q9BQG0;Q9BQG0-2	MYBBP1A	Myb-binding protein 1A;Isoform 2 of Myb-binding protein 1A	MBB1A_HUMAN	84	93.4861	1.93486	cancer
cancer / NAT	Q9UKN8	Q9UKN8	Q9UKN8	0.973894	0.973894	1.51636e-14	159	Q9UKN8	GTF3C4	General transcription factor 3C polypeptide 4	TF3C4_HUMAN	55	96.4134	1.96413	cancer
cancer / NAT	Q8TCD5	Q8TCD5	Q8TCD5	-0.50756	0.50756	1.53091e-14	93	Q8TCD5	NT5C	5'(3')-deoxyribonucleotidase, cytosolic type	NT5C_HUMAN	16	-29.6589	0.703411	cancer
cancer / NAT	P42331;P42331-3	P42331;P42331-3	P42331	1.12597	1.12597	1.56047e-14	150	P42331;P42331-3	ARHGAP25	Rho GTPase-activating protein 25;Isoform 3 of Rho GTPase-activating protein 25	RHG25_HUMAN	42	118.248	2.18248	cancer
cancer / NAT	O15355	O15355	O15355	0.953967	0.953967	1.63858e-14	174	O15355	PPM1G	Protein phosphatase 1G	PPM1G_HUMAN	34	93.7192	1.93719	cancer
cancer / NAT	P51991-2	P51991-2	P51991	0.713325	0.713325	1.73312e-14	252	P51991-2	HNRNPA3	Isoform 2 of Heterogeneous nuclear ribonucleoprotein A3	ROA3_HUMAN	36	63.9578	1.63958	cancer
cancer / NAT	O43290	O43290	O43290	1.06828	1.06828	1.7553e-14	228	O43290	SART1	U4/U6.U5 tri-snRNP-associated protein 1	SNUT1_HUMAN	58	109.693	2.09693	cancer
cancer / NAT	Q13402;Q13402-2;Q13402-6	Q13402;Q13402-2;Q13402-6	Q13402	-2.40325	2.40325	1.83945e-14	114	Q13402;Q13402-2;Q13402-6	MYO7A	Unconventional myosin-VIIa;Isoform 2 of Unconventional myosin-VIIa;Isoform 6 of Unconventional myosin-VIIa	MYO7A_HUMAN	49	-81.0962	0.189038	cancer
cancer / NAT	Q8TBC4	Q8TBC4	Q8TBC4	0.411031	0.411031	1.87854e-14	150	Q8TBC4	UBA3	NEDD8-activating enzyme E1 catalytic subunit	UBA3_HUMAN	31	32.9636	1.32964	cancer
cancer / NAT	Q12888;Q12888-2	Q12888;Q12888-2	Q12888	0.620981	0.620981	1.90757e-14	468	Q12888;Q12888-2	TP53BP1	TP53-binding protein 1;Isoform 2 of TP53-binding protein 1	TP53B_HUMAN	123	53.792	1.53792	cancer
cancer / NAT	P07305	P07305	P07305	-3.24105	3.24105	1.96648e-14	54	P07305	H1F0	Histone H1.0	H10_HUMAN	11	-89.4234	0.105766	cancer
cancer / NAT	P52566	P52566	P52566	1.0434	1.0434	2.03252e-14	126	P52566	ARHGDIB	Rho GDP-dissociation inhibitor 2	GDIR2_HUMAN	20	106.108	2.06108	cancer
cancer / NAT	Q96CM8;Q96CM8-2;Q96CM8-3	Q96CM8;Q96CM8-2;Q96CM8-3	Q96CM8	-1.23343	1.23343	2.07039e-14	111	Q96CM8;Q96CM8-2;Q96CM8-3	ACSF2	Acyl-CoA synthetase family member 2, mitochondrial;Isoform 2 of Acyl-CoA synthetase family member 2, mitochondrial;Isoform 3 of Acyl-CoA synthetase family member 2, mitochondrial	ACSF2_HUMAN	30	-57.4696	0.425304	cancer
cancer / NAT	Q96PP8	Q96PP8	Q96PP8	2.85885	2.85885	2.10939e-14	126	Q96PP8	GBP5	Guanylate-binding protein 5	GBP5_HUMAN	32	625.438	7.25438	cancer
cancer / NAT	Q96C19	Q96C19	Q96C19	-0.614885	0.614885	2.22023e-14	84	Q96C19	EFHD2	EF-hand domain-containing protein D2	EFHD2_HUMAN	21	-34.7018	0.652982	cancer
cancer / NAT	Q9BVM4	Q9BVM4	Q9BVM4	-1.71554	1.71554	2.22559e-14	24	Q9BVM4	GGACT	Gamma-glutamylaminecyclotransferase	GGACT_HUMAN	7	-69.5511	0.304489	cancer
cancer / NAT	P55081	P55081	P55081	1.49842	1.49842	2.27896e-14	78	P55081	MFAP1	Microfibrillar-associated protein 1	MFAP1_HUMAN	22	182.533	2.82533	cancer
cancer / NAT	O95372	O95372	O95372	1.3093	1.3093	2.28628e-14	93	O95372	LYPLA2	Acyl-protein thioesterase 2	LYPA2_HUMAN	10	147.822	2.47822	cancer
cancer / NAT	Q9NZ63	Q9NZ63	Q9NZ63	1.70539	1.70539	2.35786e-14	123	Q9NZ63	C9orf78	Telomere length and silencing protein 1 homolog	TLS1_HUMAN	29	226.118	3.26118	cancer
cancer / NAT	P98196	P98196	P98196	-1.51738	1.51738	2.3818e-14	51	P98196	ATP11A	Probable phospholipid-transporting ATPase IH	AT11A_HUMAN	34	-65.0681	0.349319	cancer
cancer / NAT	O95361	O95361	O95361	-3.05576	3.05576	2.3823e-14	84	O95361	TRIM16	Tripartite motif-containing protein 16	TRI16_HUMAN	36	-87.9739	0.120261	cancer
cancer / NAT	P22413	P22413	P22413	-1.55978	1.55978	2.39586e-14	153	P22413	ENPP1	Ectonucleotide pyrophosphatase/phosphodiesterase family member 1	ENPP1_HUMAN	44	-66.0797	0.339203	cancer
cancer / NAT	O75746	O75746	O75746	0.984351	0.984351	2.41114e-14	207	O75746	SLC25A12	Calcium-binding mitochondrial carrier protein Aralar1	CMC1_HUMAN	47	97.8424	1.97842	cancer
cancer / NAT	P15880	P15880	P15880	0.519263	0.519263	2.45517e-14	141	P15880	RPS2	40S ribosomal protein S2	RS2_HUMAN	21	43.3223	1.43322	cancer
cancer / NAT	P60660	P60660	P60660	-0.614728	0.614728	2.45556e-14	69	P60660	MYL6	Myosin light polypeptide 6	MYL6_HUMAN	10	-34.6947	0.653053	cancer
cancer / NAT	Q96IZ0	Q96IZ0	Q96IZ0	-0.971102	0.971102	2.50087e-14	42	Q96IZ0	PAWR	PRKC apoptosis WT1 regulator protein	PAWR_HUMAN	16	-48.9884	0.510116	cancer
cancer / NAT	Q9Y3B2	Q9Y3B2	Q9Y3B2	1.49308	1.49308	2.53963e-14	57	Q9Y3B2	EXOSC1	Exosome complex component CSL4	EXOS1_HUMAN	11	181.489	2.81489	cancer
cancer / NAT	Q8IWI9;Q8IWI9-4	Q8IWI9;Q8IWI9-4	Q8IWI9	0.689718	0.689718	2.59635e-14	183	Q8IWI9;Q8IWI9-4	MGA	MAX gene-associated protein;Isoform 4 of MAX gene-associated protein	MGAP_HUMAN	77	61.2969	1.61297	cancer
cancer / NAT	P08651-2	P08651-2	P08651	-2.16946	2.16946	2.67893e-14	78	P08651-2	NFIC	Isoform 1 of Nuclear factor 1 C-type	NFIC_HUMAN	22	-77.7706	0.222294	cancer
cancer / NAT	Q15257-2	Q15257-2	Q15257	-0.903187	0.903187	2.69201e-14	108	Q15257-2	PTPA	Isoform 1 of Serine/threonine-protein phosphatase 2A activator	PTPA_HUMAN	19	-46.5296	0.534704	cancer
cancer / NAT	Q96MM6	Q96MM6	Q96MM6	-1.94996	1.94996	2.72682e-14	114	Q96MM6	HSPA12B	Heat shock 70 kDa protein 12B	HS12B_HUMAN	40	-74.1177	0.258823	cancer
cancer / NAT	O60701	O60701	O60701	-0.539627	0.539627	2.77277e-14	162	O60701	UGDH	UDP-glucose 6-dehydrogenase	UGDH_HUMAN	40	-31.2051	0.687949	cancer
cancer / NAT	Q15397	Q15397	Q15397	1.02041	1.02041	2.84282e-14	180	Q15397	PUM3	Pumilio homolog 3	PUM3_HUMAN	37	102.85	2.0285	cancer
cancer / NAT	Q2NL82	Q2NL82	Q2NL82	1.32003	1.32003	2.86463e-14	138	Q2NL82	TSR1	Pre-rRNA-processing protein TSR1 homolog	TSR1_HUMAN	40	149.671	2.49671	cancer
cancer / NAT	Q9UJQ4	Q9UJQ4	Q9UJQ4	2.11567	2.11567	2.87214e-14	123	Q9UJQ4	SALL4	Sal-like protein 4	SALL4_HUMAN	44	333.393	4.33393	cancer
cancer / NAT	Q9H4M9	Q9H4M9	Q9H4M9	-0.526447	0.526447	2.88726e-14	183	Q9H4M9	EHD1	EH domain-containing protein 1	EHD1_HUMAN	34	-30.5738	0.694262	cancer
cancer / NAT	P13591-1	P13591-1	P13591	-3.17086	3.17086	2.89803e-14	99	P13591-1	NCAM1	Isoform 2 of Neural cell adhesion molecule 1	NCAM1_HUMAN	29	-88.8961	0.111039	cancer
cancer / NAT	Q8IU85	Q8IU85	Q8IU85	-2.24617	2.24617	2.89803e-14	57	Q8IU85	CAMK1D	Calcium/calmodulin-dependent protein kinase type 1D	KCC1D_HUMAN	19	-78.9216	0.210784	cancer
cancer / NAT	Q04721	Q04721	Q04721	-2.06265	2.06265	2.95203e-14	111	Q04721	NOTCH2	Neurogenic locus notch homolog protein 2	NOTC2_HUMAN	49	-76.0623	0.239377	cancer
cancer / NAT	O75534;O75534-4	O75534;O75534-4	O75534	0.743002	0.743002	3.08236e-14	240	O75534;O75534-4	CSDE1	Cold shock domain-containing protein E1;Isoform 4 of Cold shock domain-containing protein E1	CSDE1_HUMAN	60	67.3655	1.67365	cancer
cancer / NAT	Q7Z7A3	Q7Z7A3	Q7Z7A3	0.764436	0.764436	3.08236e-14	63	Q7Z7A3	CTU1	Cytoplasmic tRNA 2-thiolation protein 1	CTU1_HUMAN	17	69.8705	1.69871	cancer
cancer / NAT	Q6P1J9	Q6P1J9	Q6P1J9	0.813725	0.813725	3.08236e-14	147	Q6P1J9	CDC73	Parafibromin	CDC73_HUMAN	41	75.7744	1.75774	cancer
cancer / NAT	Q96N67;Q96N67-5	Q96N67;Q96N67-5	Q96N67	-0.104313	0.104313	3.15729e-14	321	Q96N67;Q96N67-5	DOCK7	Dedicator of cytokinesis protein 7;Isoform 5 of Dedicator of cytokinesis protein 7	DOCK7_HUMAN	94	-6.9752	0.930248	cancer
cancer / NAT	P35556	P35556	P35556	-3.75613	3.75613	3.28204e-14	63	P35556	FBN2	Fibrillin-2	FBN2_HUMAN	43	-92.599	0.0740103	cancer
cancer / NAT	Q99615	Q99615	Q99615	0.732566	0.732566	3.32381e-14	165	Q99615	DNAJC7	DnaJ homolog subfamily C member 7	DNJC7_HUMAN	39	66.1592	1.66159	cancer
cancer / NAT	P20020;P20020-3;P20020-4;P20020-6	P20020;P20020-3;P20020-4;P20020-6	P20020	-0.550663	0.550663	3.37138e-14	225	P20020;P20020-3;P20020-4;P20020-6	ATP2B1	Plasma membrane calcium-transporting ATPase 1;Isoform B of Plasma membrane calcium-transporting ATPase 1;Isoform C of Plasma membrane calcium-transporting ATPase 1;Isoform K of Plasma membrane calcium-transporting ATPase 1	AT2B1_HUMAN	55	-31.7294	0.682706	cancer
cancer / NAT	Q9Y5L3	Q9Y5L3	Q9Y5L3	-4.22552	4.22552	3.44891e-14	60	Q9Y5L3	ENTPD2	Ectonucleoside triphosphate diphosphohydrolase 2	ENTP2_HUMAN	12	-94.6545	0.0534553	cancer
cancer / NAT	P43897	P43897	P43897	0.726396	0.726396	3.62565e-14	129	P43897	TSFM	Elongation factor Ts, mitochondrial	EFTS_HUMAN	26	65.4501	1.6545	cancer
cancer / NAT	P25774	P25774	P25774	1.5411	1.5411	3.79789e-14	69	P25774	CTSS	Cathepsin S	CATS_HUMAN	15	191.016	2.91016	cancer
cancer / NAT	Q6NUK1	Q6NUK1	Q6NUK1	-0.563118	0.563118	3.80832e-14	144	Q6NUK1	SLC25A24	Calcium-binding mitochondrial carrier protein SCaMC-1	SCMC1_HUMAN	31	-32.3162	0.676838	cancer
cancer / NAT	Q92629-2	Q92629-2	Q92629	-3.47345	3.47345	3.81687e-14	54	Q92629-2	SGCD	Isoform 2 of Delta-sarcoglycan	SGCD_HUMAN	15	-90.997	0.0900299	cancer
cancer / NAT	Q92990	Q92990	Q92990	1.33738	1.33738	4.05349e-14	78	Q92990	GLMN	Glomulin	GLMN_HUMAN	27	152.691	2.52691	cancer
cancer / NAT	P04844	P04844	P04844	-0.465858	0.465858	4.08738e-14	171	P04844	RPN2	Dolichyl-diphosphooligosaccharide--protein glycosyltransferase subunit 2	RPN2_HUMAN	31	-27.5959	0.724041	cancer
cancer / NAT	Q9H089	Q9H089	Q9H089	0.304486	0.304486	4.09267e-14	147	Q9H089	LSG1	Large subunit GTPase 1 homolog	LSG1_HUMAN	38	23.4978	1.23498	cancer
cancer / NAT	Q86WA8	Q86WA8	Q86WA8	-1.12595	1.12595	4.09267e-14	42	Q86WA8	LONP2	Lon protease homolog 2, peroxisomal	LONP2_HUMAN	27	-54.1799	0.458201	cancer
cancer / NAT	Q04837	Q04837	Q04837	1.20384	1.20384	4.14967e-14	75	Q04837	SSBP1	Single-stranded DNA-binding protein, mitochondrial	SSBP_HUMAN	11	130.352	2.30352	cancer
cancer / NAT	Q7RTR0	Q7RTR0	Q7RTR0	1.02488	1.02488	4.20515e-14	147	Q7RTR0	NLRP9	NACHT, LRR and PYD domains-containing protein 9	NLRP9_HUMAN	54	103.479	2.03479	cancer
cancer / NAT	Q53FA7	Q53FA7	Q53FA7	-1.62934	1.62934	4.21047e-14	69	Q53FA7	TP53I3	Quinone oxidoreductase PIG3	QORX_HUMAN	17	-67.6765	0.323235	cancer
cancer / NAT	Q7Z3T8	Q7Z3T8	Q7Z3T8	-0.758734	0.758734	4.30739e-14	81	Q7Z3T8	ZFYVE16	Zinc finger FYVE domain-containing protein 16	ZFY16_HUMAN	45	-40.8985	0.591015	cancer
cancer / NAT	P06239;P06239-3	P06239;P06239-3	P06239	1.28694	1.28694	4.32313e-14	39	P06239;P06239-3	LCK	Tyrosine-protein kinase Lck;Isoform 3 of Tyrosine-protein kinase Lck	LCK_HUMAN	15	144.01	2.4401	cancer
cancer / NAT	Q92667	Q92667	Q92667	1.5387	1.5387	4.37846e-14	153	Q92667	AKAP1	A-kinase anchor protein 1, mitochondrial	AKAP1_HUMAN	49	190.533	2.90533	cancer
cancer / NAT	P41567	P41567	P41567	0.694324	0.694324	4.409e-14	78	P41567	EIF1	Eukaryotic translation initiation factor 1	EIF1_HUMAN	15	61.8126	1.61813	cancer
cancer / NAT	Q8NEY1;Q8NEY1-2;Q8NEY1-3	Q8NEY1;Q8NEY1-2;Q8NEY1-3	Q8NEY1	1.40694	1.40694	4.43426e-14	162	Q8NEY1;Q8NEY1-2;Q8NEY1-3	NAV1	Neuron navigator 1;Isoform 2 of Neuron navigator 1;Isoform 3 of Neuron navigator 1	NAV1_HUMAN	86	165.174	2.65174	cancer
cancer / NAT	Q14449-2	Q14449-2	Q14449	-3.63466	3.63466	4.62971e-14	69	Q14449-2	GRB14	Isoform 2 of Growth factor receptor-bound protein 14	GRB14_HUMAN	18	-91.9489	0.0805115	cancer
cancer / NAT	P33121	P33121	P33121	-0.434464	0.434464	4.66292e-14	144	P33121	ACSL1	Long-chain-fatty-acid--CoA ligase 1	ACSL1_HUMAN	32	-26.0031	0.739969	cancer
cancer / NAT	P15169	P15169	P15169	-1.6158	1.6158	4.67306e-14	30	P15169	CPN1	Carboxypeptidase N catalytic chain	CBPN_HUMAN	13	-67.3716	0.326284	cancer
cancer / NAT	O75376	O75376	O75376	1.13687	1.13687	4.76183e-14	213	O75376	NCOR1	Nuclear receptor corepressor 1	NCOR1_HUMAN	97	119.903	2.19903	cancer
cancer / NAT	Q92859;Q92859-2;Q92859-3;Q92859-4	Q92859;Q92859-2;Q92859-3;Q92859-4	Q92859	-1.3656	1.3656	4.84234e-14	111	Q92859;Q92859-2;Q92859-3;Q92859-4	NEO1	Neogenin;Isoform 2 of Neogenin;Isoform 3 of Neogenin;Isoform 4 of Neogenin	NEO1_HUMAN	35	-61.1926	0.388074	cancer
cancer / NAT	P49023	P49023	P49023	-0.50951	0.50951	4.9895e-14	126	P49023	PXN	Paxillin	PAXI_HUMAN	26	-29.7539	0.702461	cancer
cancer / NAT	Q96GQ5	Q96GQ5	Q96GQ5	-1.2786	1.2786	5.00928e-14	54	Q96GQ5	C16orf58	RUS1 family protein C16orf58	RUS1_HUMAN	16	-58.7806	0.412194	cancer
cancer / NAT	Q96L92	Q96L92	Q96L92	0.634255	0.634255	5.14637e-14	147	Q96L92	SNX27	Sorting nexin-27	SNX27_HUMAN	34	55.2136	1.55214	cancer
cancer / NAT	Q9Y3R5;Q9Y3R5-2	Q9Y3R5;Q9Y3R5-2	Q9Y3R5	-1.33838	1.33838	5.15633e-14	213	Q9Y3R5;Q9Y3R5-2	DOPEY2	Protein dopey-2;Isoform 2 of Protein dopey-2	DOP2_HUMAN	80	-60.4536	0.395464	cancer
cancer / NAT	Q04760	Q04760	Q04760	-1.34872	1.34872	5.23659e-14	93	Q04760	GLO1	Lactoylglutathione lyase	LGUL_HUMAN	16	-60.7361	0.392639	cancer
cancer / NAT	Q6NXG1-4	Q6NXG1-4	Q6NXG1	1.89911	1.89911	5.29594e-14	123	Q6NXG1-4	ESRP1	Isoform 4 of Epithelial splicing regulatory protein 1	ESRP1_HUMAN	38	272.983	3.72983	cancer
cancer / NAT	P07814	P07814	P07814	0.346338	0.346338	5.32843e-14	669	P07814	EPRS	Bifunctional glutamate/proline--tRNA ligase	SYEP_HUMAN	129	27.1329	1.27133	cancer
cancer / NAT	P30084	P30084	P30084	-0.878792	0.878792	5.53722e-14	144	P30084	ECHS1	Enoyl-CoA hydratase, mitochondrial	ECHM_HUMAN	29	-45.6177	0.543823	cancer
cancer / NAT	O75781	O75781	O75781	-2.30993	2.30993	5.54706e-14	66	O75781	PALM	Paralemmin-1	PALM_HUMAN	20	-79.8329	0.201671	cancer
cancer / NAT	P54687;P54687-4;P54687-5	P54687;P54687-4;P54687-5	P54687	-1.6249	1.6249	5.56696e-14	57	P54687;P54687-4;P54687-5	BCAT1	Branched-chain-amino-acid aminotransferase, cytosolic;Isoform 4 of Branched-chain-amino-acid aminotransferase, cytosolic;Isoform 5 of Branched-chain-amino-acid aminotransferase, cytosolic	BCAT1_HUMAN	15	-67.5768	0.324232	cancer
cancer / NAT	Q6PIU2	Q6PIU2	Q6PIU2	0.878399	0.878399	5.64656e-14	60	Q6PIU2	NCEH1	Neutral cholesterol ester hydrolase 1	NCEH1_HUMAN	17	83.8334	1.83833	cancer
cancer / NAT	Q6BCY4	Q6BCY4	Q6BCY4	-1.36169	1.36169	5.7669e-14	99	Q6BCY4	CYB5R2	NADH-cytochrome b5 reductase 2	NB5R2_HUMAN	21	-61.0873	0.389127	cancer
cancer / NAT	Q9ULW0	Q9ULW0	Q9ULW0	1.97791	1.97791	5.8146e-14	114	Q9ULW0	TPX2	Targeting protein for Xklp2	TPX2_HUMAN	51	293.923	3.93923	cancer
cancer / NAT	Q8NCW5	Q8NCW5	Q8NCW5	-0.75315	0.75315	5.8555e-14	84	Q8NCW5	NAXE	NAD(P)H-hydrate epimerase	NNRE_HUMAN	16	-40.6693	0.593307	cancer
cancer / NAT	P21810	P21810	P21810	-0.898656	0.898656	6.00395e-14	141	P21810	BGN	Biglycan	PGS1_HUMAN	22	-46.3614	0.536386	cancer
cancer / NAT	Q14678	Q14678	Q14678	0.608358	0.608358	6.02465e-14	108	Q14678	KANK1	KN motif and ankyrin repeat domain-containing protein 1	KANK1_HUMAN	48	52.4523	1.52452	cancer
cancer / NAT	O60443	O60443	O60443	-1.79856	1.79856	6.07875e-14	69	O60443	GSDME	Gasdermin-E	GSDME_HUMAN	24	-71.2538	0.287462	cancer
cancer / NAT	Q9BW19	Q9BW19	Q9BW19	0.312861	0.312861	6.28814e-14	87	Q9BW19	KIFC1	Kinesin-like protein KIFC1	KIFC1_HUMAN	39	24.2168	1.24217	cancer
cancer / NAT	P12821	P12821	P12821	0.827664	0.827664	6.32246e-14	153	P12821	ACE	Angiotensin-converting enzyme	ACE_HUMAN	42	77.4809	1.77481	cancer
cancer / NAT	Q8TDZ2;Q8TDZ2-4	Q8TDZ2;Q8TDZ2-4	Q8TDZ2	1.11558	1.11558	6.49046e-14	213	Q8TDZ2;Q8TDZ2-4	MICAL1	[F-actin]-monooxygenase MICAL1;Isoform 4 of [F-actin]-monooxygenase MICAL1	MICA1_HUMAN	53	116.682	2.16682	cancer
cancer / NAT	Q9H4D5	Q9H4D5	Q9H4D5	-3.89859	3.89859	6.49046e-14	66	Q9H4D5	NXF3	Nuclear RNA export factor 3	NXF3_HUMAN	19	-93.2949	0.0670513	cancer
cancer / NAT	Q9ULA0	Q9ULA0	Q9ULA0	-0.652071	0.652071	6.6229e-14	186	Q9ULA0	DNPEP	Aspartyl aminopeptidase	DNPEP_HUMAN	31	-36.3634	0.636366	cancer
cancer / NAT	O75569	O75569	O75569	-0.472084	0.472084	6.64562e-14	111	O75569	PRKRA	Interferon-inducible double-stranded RNA-dependent protein kinase activator A	PRKRA_HUMAN	21	-27.9077	0.720923	cancer
cancer / NAT	P00167;P00167-2	P00167;P00167-2	P00167	-3.20912	3.20912	6.65046e-14	39	P00167;P00167-2	CYB5A	Cytochrome b5;Isoform 2 of Cytochrome b5	CYB5_HUMAN	7	-89.1867	0.108133	cancer
cancer / NAT	P05198	P05198	P05198	0.890752	0.890752	6.7477e-14	213	P05198	EIF2S1	Eukaryotic translation initiation factor 2 subunit 1	IF2A_HUMAN	41	85.4143	1.85414	cancer
cancer / NAT	Q9NS86	Q9NS86	Q9NS86	1.0172	1.0172	6.7477e-14	165	Q9NS86	LANCL2	LanC-like protein 2	LANC2_HUMAN	29	102.399	2.02399	cancer
cancer / NAT	Q5RKV6	Q5RKV6	Q5RKV6	1.48233	1.48233	6.927e-14	51	Q5RKV6	EXOSC6	Exosome complex component MTR3	EXOS6_HUMAN	13	179.399	2.79399	cancer
cancer / NAT	Q9H2G2-2	Q9H2G2-2	Q9H2G2	0.0544435	0.0544435	7.20362e-14	267	Q9H2G2-2	SLK	Isoform 2 of STE20-like serine/threonine-protein kinase	SLK_HUMAN	85	3.84585	1.03846	cancer
cancer / NAT	Q9BVP2;Q9BVP2-2	Q9BVP2;Q9BVP2-2	Q9BVP2	1.13983	1.13983	7.27017e-14	159	Q9BVP2;Q9BVP2-2	GNL3	Guanine nucleotide-binding protein-like 3;Isoform 2 of Guanine nucleotide-binding protein-like 3	GNL3_HUMAN	36	120.355	2.20355	cancer
cancer / NAT	Q8NDH3	Q8NDH3	Q8NDH3	-2.22011	2.22011	7.45592e-14	48	Q8NDH3	NPEPL1	Probable aminopeptidase NPEPL1	PEPL1_HUMAN	18	-78.5376	0.214624	cancer
cancer / NAT	Q9H8H3	Q9H8H3	Q9H8H3	-2.28747	2.28747	7.56989e-14	60	Q9H8H3	METTL7A	Methyltransferase-like protein 7A	MET7A_HUMAN	11	-79.5166	0.204834	cancer
cancer / NAT	Q9UKF6	Q9UKF6	Q9UKF6	0.92736	0.92736	7.57425e-14	177	Q9UKF6	CPSF3	Cleavage and polyadenylation specificity factor subunit 3	CPSF3_HUMAN	37	90.1792	1.90179	cancer
cancer / NAT	P24844	P24844	P24844	-0.635438	0.635438	7.79421e-14	117	P24844	MYL9	Myosin regulatory light polypeptide 9	MYL9_HUMAN	15	-35.6255	0.643745	cancer
cancer / NAT	Q9BSC4	Q9BSC4	Q9BSC4	1.14941	1.14941	8.11117e-14	108	Q9BSC4	NOL10	Nucleolar protein 10	NOL10_HUMAN	31	121.823	2.21823	cancer
cancer / NAT	P40121	P40121	P40121	1.88962	1.88962	8.34928e-14	135	P40121	CAPG	Macrophage-capping protein	CAPG_HUMAN	21	270.537	3.70537	cancer
cancer / NAT	P13611	P13611	P13611	-0.984905	0.984905	8.66686e-14	153	P13611	VCAN	Versican core protein	CSPG2_HUMAN	45	-49.4741	0.505259	cancer
cancer / NAT	Q86YR5;Q86YR5-4	Q86YR5;Q86YR5-4	Q86YR5	-3.34723	3.34723	8.72288e-14	78	Q86YR5;Q86YR5-4	GPSM1	G-protein-signaling modulator 1;Isoform 4 of G-protein-signaling modulator 1	GPSM1_HUMAN	33	-90.1739	0.0982613	cancer
cancer / NAT	Q92636	Q92636	Q92636	1.28796	1.28796	8.75511e-14	123	Q92636	NSMAF	Protein FAN	FAN_HUMAN	39	144.183	2.44183	cancer
cancer / NAT	Q14232	Q14232	Q14232	0.780685	0.780685	8.79297e-14	102	Q14232	EIF2B1	Translation initiation factor eIF-2B subunit alpha	EI2BA_HUMAN	23	71.7947	1.71795	cancer
cancer / NAT	O43237	O43237	O43237	-0.988759	0.988759	8.86052e-14	162	O43237	DYNC1LI2	Cytoplasmic dynein 1 light intermediate chain 2	DC1L2_HUMAN	37	-49.6089	0.503911	cancer
cancer / NAT	O14787-2	O14787-2	O14787	-0.698743	0.698743	8.86052e-14	132	O14787-2	TNPO2	Isoform 2 of Transportin-2	TNPO2_HUMAN	29	-38.3891	0.616109	cancer
cancer / NAT	Q8ND71	Q8ND71	Q8ND71	0.665939	0.665939	8.87103e-14	99	Q8ND71	GIMAP8	GTPase IMAP family member 8	GIMA8_HUMAN	37	58.6601	1.5866	cancer
cancer / NAT	P38919	P38919	P38919	0.843653	0.843653	9.08677e-14	168	P38919	EIF4A3	Eukaryotic initiation factor 4A-III	IF4A3_HUMAN	32	79.4589	1.79459	cancer
cancer / NAT	Q562E7	Q562E7	Q562E7	-0.627937	0.627937	9.15979e-14	165	Q562E7	WDR81	WD repeat-containing protein 81	WDR81_HUMAN	68	-35.2899	0.647101	cancer
cancer / NAT	O95232	O95232	O95232	1.47152	1.47152	9.27114e-14	162	O95232	LUC7L3	Luc7-like protein 3	LC7L3_HUMAN	34	177.314	2.77314	cancer
cancer / NAT	Q9NV06	Q9NV06	Q9NV06	2.52925	2.52925	9.38788e-14	108	Q9NV06	DCAF13	DDB1- and CUL4-associated factor 13	DCA13_HUMAN	27	477.273	5.77273	cancer
cancer / NAT	P55011;P55011-3	P55011;P55011-3	P55011	-1.71811	1.71811	9.40781e-14	60	P55011;P55011-3	SLC12A2	Solute carrier family 12 member 2;Isoform 2 of Solute carrier family 12 member 2	S12A2_HUMAN	36	-69.6054	0.303946	cancer
cancer / NAT	O00423;O00423-3	O00423;O00423-3	O00423	-0.686785	0.686785	1.0886e-13	84	O00423;O00423-3	EML1	Echinoderm microtubule-associated protein-like 1;Isoform 3 of Echinoderm microtubule-associated protein-like 1	EMAL1_HUMAN	30	-37.8763	0.621237	cancer
cancer / NAT	Q8IVN8	Q8IVN8	Q8IVN8	-2.35677	2.35677	1.10307e-13	39	Q8IVN8	SBSPON	Somatomedin-B and thrombospondin type-1 domain-containing protein	SBSPO_HUMAN	11	-80.4772	0.195228	cancer
cancer / NAT	Q969P0	Q969P0	Q969P0	-1.71339	1.71339	1.10828e-13	75	Q969P0	IGSF8	Immunoglobulin superfamily member 8	IGSF8_HUMAN	20	-69.5057	0.304943	cancer
cancer / NAT	Q96JB3-2	Q96JB3-2	Q96JB3	1.86538	1.86538	1.10828e-13	78	Q96JB3-2	HIC2	Isoform 2 of Hypermethylated in cancer 2 protein	HIC2_HUMAN	18	264.365	3.64365	cancer
cancer / NAT	Q7L0Y3	Q7L0Y3	Q7L0Y3	1.33879	1.33879	1.1157e-13	141	Q7L0Y3	TRMT10C	tRNA methyltransferase 10 homolog C	TM10C_HUMAN	29	152.94	2.5294	cancer
cancer / NAT	P37058	P37058	P37058	-2.11733	2.11733	1.12934e-13	72	P37058	HSD17B3	Testosterone 17-beta-dehydrogenase 3	DHB3_HUMAN	17	-76.9526	0.230474	cancer
cancer / NAT	Q9HCS7	Q9HCS7	Q9HCS7	0.594972	0.594972	1.13683e-13	168	Q9HCS7	XAB2	Pre-mRNA-splicing factor SYF1	SYF1_HUMAN	50	51.0443	1.51044	cancer
cancer / NAT	Q15493	Q15493	Q15493	-2.39415	2.39415	1.1571e-13	54	Q15493	RGN	Regucalcin	RGN_HUMAN	20	-80.9766	0.190234	cancer
cancer / NAT	Q7Z6B7	Q7Z6B7	Q7Z6B7	0.991637	0.991637	1.21505e-13	171	Q7Z6B7	SRGAP1	SLIT-ROBO Rho GTPase-activating protein 1	SRGP1_HUMAN	59	98.844	1.98844	cancer
cancer / NAT	P52789	P52789	P52789	-1.23675	1.23675	1.22405e-13	171	P52789	HK2	Hexokinase-2	HXK2_HUMAN	48	-57.5673	0.424327	cancer
cancer / NAT	Q9ULR3	Q9ULR3	Q9ULR3	1.58821	1.58821	1.2458e-13	93	Q9ULR3	PPM1H	Protein phosphatase 1H	PPM1H_HUMAN	29	200.675	3.00675	cancer
cancer / NAT	P83111	P83111	P83111	1.15552	1.15552	1.31217e-13	168	P83111	LACTB	Serine beta-lactamase-like protein LACTB, mitochondrial	LACTB_HUMAN	36	122.764	2.22764	cancer
cancer / NAT	P02750	P02750	P02750	-1.93116	1.93116	1.31738e-13	69	P02750	LRG1	Leucine-rich alpha-2-glycoprotein	A2GL_HUMAN	15	-73.7781	0.262219	cancer
cancer / NAT	P08559	P08559	P08559	-0.783644	0.783644	1.32483e-13	144	P08559	PDHA1	Pyruvate dehydrogenase E1 component subunit alpha, somatic form, mitochondrial	ODPA_HUMAN	30	-41.9102	0.580898	cancer
cancer / NAT	Q8N5N7	Q8N5N7	Q8N5N7	0.845022	0.845022	1.37998e-13	42	Q8N5N7	MRPL50	39S ribosomal protein L50, mitochondrial	RM50_HUMAN	9	79.6292	1.79629	cancer
cancer / NAT	Q15024	Q15024	Q15024	1.26859	1.26859	1.38161e-13	75	Q15024	EXOSC7	Exosome complex component RRP42	EXOS7_HUMAN	18	140.925	2.40925	cancer
cancer / NAT	O14867	O14867	O14867	1.47548	1.47548	1.38899e-13	120	O14867	BACH1	Transcription regulator protein BACH1	BACH1_HUMAN	40	178.076	2.78076	cancer
cancer / NAT	P09417	P09417	P09417	-0.6405	0.6405	1.39774e-13	93	P09417	QDPR	Dihydropteridine reductase	DHPR_HUMAN	16	-35.851	0.64149	cancer
cancer / NAT	P84103;P84103-2	P84103;P84103-2	P84103	0.742206	0.742206	1.41185e-13	72	P84103;P84103-2	SRSF3	Serine/arginine-rich splicing factor 3;Isoform 2 of Serine/arginine-rich splicing factor 3	SRSF3_HUMAN	14	67.2731	1.67273	cancer
cancer / NAT	Q8IY37	Q8IY37	Q8IY37	1.23449	1.23449	1.41212e-13	147	Q8IY37	DHX37	Probable ATP-dependent RNA helicase DHX37	DHX37_HUMAN	52	135.297	2.35297	cancer
cancer / NAT	P43403	P43403	P43403	0.616553	0.616553	1.41913e-13	108	P43403	ZAP70	Tyrosine-protein kinase ZAP-70	ZAP70_HUMAN	39	53.3207	1.53321	cancer
cancer / NAT	Q9NUW8	Q9NUW8	Q9NUW8	2.06278	2.06278	1.43874e-13	93	Q9NUW8	TDP1	Tyrosyl-DNA phosphodiesterase 1	TYDP1_HUMAN	34	317.792	4.17792	cancer
cancer / NAT	Q9BXW6	Q9BXW6	Q9BXW6	-1.35465	1.35465	1.45103e-13	78	Q9BXW6	OSBPL1A	Oxysterol-binding protein-related protein 1	OSBL1_HUMAN	39	-60.8972	0.391028	cancer
cancer / NAT	P53396-2	P53396-2	P53396	-0.329927	0.329927	1.45916e-13	366	P53396-2	ACLY	Isoform 2 of ATP-citrate synthase	ACLY_HUMAN	69	-20.4423	0.795577	cancer
cancer / NAT	Q9H1A4	Q9H1A4	Q9H1A4	0.642151	0.642151	1.48392e-13	228	Q9H1A4	ANAPC1	Anaphase-promoting complex subunit 1	APC1_HUMAN	78	56.0654	1.56065	cancer
cancer / NAT	O14907	O14907	O14907	-1.71529	1.71529	1.61529e-13	30	O14907	TAX1BP3	Tax1-binding protein 3	TX1B3_HUMAN	6	-69.5459	0.304541	cancer
cancer / NAT	P62253	P62253	P62253	1.25809	1.25809	1.64759e-13	48	P62253	UBE2G1	Ubiquitin-conjugating enzyme E2 G1	UB2G1_HUMAN	15	139.179	2.39179	cancer
cancer / NAT	O94819	O94819	O94819	-2.67468	2.67468	1.67135e-13	72	O94819	KBTBD11	Kelch repeat and BTB domain-containing protein 11	KBTBB_HUMAN	32	-84.3382	0.156618	cancer
cancer / NAT	Q5TEJ8	Q5TEJ8	Q5TEJ8	0.721575	0.721575	1.71486e-13	87	Q5TEJ8	THEMIS2	Protein THEMIS2	THMS2_HUMAN	28	64.8981	1.64898	cancer
cancer / NAT	P07384	P07384	P07384	-0.673136	0.673136	1.73721e-13	195	P07384	CAPN1	Calpain-1 catalytic subunit	CAN1_HUMAN	50	-37.2858	0.627142	cancer
cancer / NAT	Q9UKX7	Q9UKX7	Q9UKX7	1.2242	1.2242	1.84359e-13	120	Q9UKX7	NUP50	Nuclear pore complex protein Nup50	NUP50_HUMAN	36	133.626	2.33626	cancer
cancer / NAT	P51572;P51572-2	P51572;P51572-2	P51572	-0.805877	0.805877	1.8757e-13	186	P51572;P51572-2	BCAP31	B-cell receptor-associated protein 31;Isoform 2 of B-cell receptor-associated protein 31	BAP31_HUMAN	29	-42.7986	0.572014	cancer
cancer / NAT	Q9H6R0	Q9H6R0	Q9H6R0	1.47816	1.47816	1.87904e-13	108	Q9H6R0	DHX33	ATP-dependent RNA helicase DHX33	DHX33_HUMAN	39	178.593	2.78593	cancer
cancer / NAT	Q9Y6E0;Q9Y6E0-2	Q9Y6E0;Q9Y6E0-2	Q9Y6E0	-0.553606	0.553606	1.90458e-13	69	Q9Y6E0;Q9Y6E0-2	STK24	Serine/threonine-protein kinase 24;Isoform A of Serine/threonine-protein kinase 24	STK24_HUMAN	18	-31.8685	0.681315	cancer
cancer / NAT	O60664-2	O60664-2	O60664	-0.774578	0.774578	1.9096e-13	102	O60664-2	PLIN3	Isoform 2 of Perilipin-3	PLIN3_HUMAN	18	-41.544	0.58456	cancer
cancer / NAT	Q9Y6C9	Q9Y6C9	Q9Y6C9	-0.84243	0.84243	1.96716e-13	63	Q9Y6C9	MTCH2	Mitochondrial carrier homolog 2	MTCH2_HUMAN	12	-44.2296	0.557704	cancer
cancer / NAT	P02655	P02655	P02655	-1.59814	1.59814	1.97168e-13	30	P02655	APOC2	Apolipoprotein C-II	APOC2_HUMAN	6	-66.9697	0.330303	cancer
cancer / NAT	Q9BY44	Q9BY44	Q9BY44	1.0512	1.0512	2.0274e-13	189	Q9BY44	EIF2A	Eukaryotic translation initiation factor 2A	EIF2A_HUMAN	35	107.225	2.07225	cancer
cancer / NAT	P19623	P19623	P19623	1.12306	1.12306	2.06096e-13	141	P19623	SRM	Spermidine synthase	SPEE_HUMAN	27	117.809	2.17809	cancer
cancer / NAT	Q8N474	Q8N474	Q8N474	-3.57325	3.57325	2.07969e-13	66	Q8N474	SFRP1	Secreted frizzled-related protein 1	SFRP1_HUMAN	13	-91.5987	0.0840127	cancer
cancer / NAT	P52306	P52306	P52306	-0.766847	0.766847	2.14643e-13	123	P52306	RAP1GDS1	Rap1 GTPase-GDP dissociation stimulator 1	GDS1_HUMAN	28	-41.23	0.5877	cancer
cancer / NAT	Q9BY67;Q9BY67-3;Q9BY67-4;Q9BY67-5	Q9BY67;Q9BY67-3;Q9BY67-4;Q9BY67-5	Q9BY67	-3.78957	3.78957	2.18463e-13	54	Q9BY67;Q9BY67-3;Q9BY67-4;Q9BY67-5	CADM1	Cell adhesion molecule 1;Isoform 3 of Cell adhesion molecule 1;Isoform 4 of Cell adhesion molecule 1;Isoform 5 of Cell adhesion molecule 1	CADM1_HUMAN	15	-92.7685	0.0723148	cancer
cancer / NAT	Q96C23	Q96C23	Q96C23	-0.866724	0.866724	2.23734e-13	90	Q96C23	GALM	Aldose 1-epimerase	GALM_HUMAN	19	-45.1609	0.548391	cancer
cancer / NAT	O94875-12;O94875-4	O94875-12;O94875-4	O94875	-1.21289	1.21289	2.24022e-13	162	O94875-12;O94875-4	SORBS2	Isoform 12 of Sorbin and SH3 domain-containing protein 2;Isoform 4 of Sorbin and SH3 domain-containing protein 2	SRBS2_HUMAN	45	-56.8596	0.431404	cancer
cancer / NAT	Q9Y2W2	Q9Y2W2	Q9Y2W2	1.34422	1.34422	2.24418e-13	183	Q9Y2W2	WBP11	WW domain-binding protein 11	WBP11_HUMAN	39	153.893	2.53893	cancer
cancer / NAT	Q9GZR2	Q9GZR2	Q9GZR2	0.849133	0.849133	2.37192e-13	72	Q9GZR2	REXO4	RNA exonuclease 4	REXO4_HUMAN	22	80.1419	1.80142	cancer
cancer / NAT	Q9GZL7	Q9GZL7	Q9GZL7	1.9942	1.9942	2.39143e-13	129	Q9GZL7	WDR12	Ribosome biogenesis protein WDR12	WDR12_HUMAN	28	298.396	3.98396	cancer
cancer / NAT	Q99459	Q99459	Q99459	-0.927856	0.927856	2.47719e-13	261	Q99459	CDC5L	Cell division cycle 5-like protein	CDC5L_HUMAN	69	-47.4361	0.525639	cancer
cancer / NAT	Q96A00	Q96A00	Q96A00	-2.02667	2.02667	2.48097e-13	24	Q96A00	PPP1R14A	Protein phosphatase 1 regulatory subunit 14A	PP14A_HUMAN	7	-75.4579	0.245421	cancer
cancer / NAT	P22392-2	P22392-2	P22392	0.628377	0.628377	2.51067e-13	189	P22392-2	NME2	Isoform 3 of Nucleoside diphosphate kinase B	NDKB_HUMAN	26	54.5825	1.54583	cancer
cancer / NAT	Q8IYB8	Q8IYB8	Q8IYB8	0.804026	0.804026	2.58639e-13	159	Q8IYB8	SUPV3L1	ATP-dependent RNA helicase SUPV3L1, mitochondrial	SUV3_HUMAN	39	74.5967	1.74597	cancer
cancer / NAT	Q9UMS6-2	Q9UMS6-2	Q9UMS6	-0.974155	0.974155	2.61661e-13	255	Q9UMS6-2	SYNPO2	Isoform 2 of Synaptopodin-2	SYNP2_HUMAN	80	-49.0962	0.509038	cancer
cancer / NAT	P09936	P09936	P09936	-0.616508	0.616508	2.65833e-13	132	P09936	UCHL1	Ubiquitin carboxyl-terminal hydrolase isozyme L1	UCHL1_HUMAN	20	-34.7752	0.652248	cancer
cancer / NAT	O95071;O95071-2	O95071;O95071-2	O95071	0.83906	0.83906	2.71681e-13	252	O95071;O95071-2	UBR5	E3 ubiquitin-protein ligase UBR5;Isoform 2 of E3 ubiquitin-protein ligase UBR5	UBR5_HUMAN	100	78.8884	1.78888	cancer
cancer / NAT	Q4KMQ2-2	Q4KMQ2-2	Q4KMQ2	-1.07594	1.07594	2.74819e-13	99	Q4KMQ2-2	ANO6	Isoform 2 of Anoctamin-6	ANO6_HUMAN	32	-52.5639	0.474361	cancer
cancer / NAT	Q9HCM1	Q9HCM1	Q9HCM1	1.6714	1.6714	2.82676e-13	129	Q9HCM1	KIAA1551	Uncharacterized protein KIAA1551	K1551_HUMAN	69	218.524	3.18524	cancer
cancer / NAT	P43243	P43243	P43243	0.755637	0.755637	2.87041e-13	438	P43243	MATR3	Matrin-3	MATR3_HUMAN	71	68.8377	1.68838	cancer
cancer / NAT	Q9UQE7	Q9UQE7	Q9UQE7	-0.300279	0.300279	2.9371e-13	492	Q9UQE7	SMC3	Structural maintenance of chromosomes protein 3	SMC3_HUMAN	119	-18.7905	0.812095	cancer
cancer / NAT	P49756	P49756	P49756	1.08397	1.08397	2.94795e-13	246	P49756	RBM25	RNA-binding protein 25	RBM25_HUMAN	59	111.986	2.11986	cancer
cancer / NAT	Q9BZZ2	Q9BZZ2	Q9BZZ2	-1.79126	1.79126	3.01636e-13	180	Q9BZZ2	SIGLEC1	Sialoadhesin	SN_HUMAN	55	-71.1081	0.288919	cancer
cancer / NAT	O95336	O95336	O95336	-0.453079	0.453079	3.04575e-13	90	O95336	PGLS	6-phosphogluconolactonase	6PGL_HUMAN	16	-26.9518	0.730482	cancer
cancer / NAT	Q00653-4	Q00653-4	Q00653	1.0196	1.0196	3.07888e-13	186	Q00653-4	NFKB2	Isoform 4 of Nuclear factor NF-kappa-B p100 subunit	NFKB2_HUMAN	45	102.736	2.02736	cancer
cancer / NAT	P04216	P04216	P04216	-1.43552	1.43552	3.07987e-13	33	P04216	THY1	Thy-1 membrane glycoprotein	THY1_HUMAN	5	-63.0287	0.369713	cancer
cancer / NAT	Q01650	Q01650	Q01650	-2.29364	2.29364	3.07987e-13	24	Q01650	SLC7A5	Large neutral amino acids transporter small subunit 1	LAT1_HUMAN	9	-79.604	0.20396	cancer
cancer / NAT	P19838;P19838-2	P19838;P19838-2	P19838	-1.90277	1.90277	3.08178e-13	156	P19838;P19838-2	NFKB1	Nuclear factor NF-kappa-B p105 subunit;Isoform 2 of Nuclear factor NF-kappa-B p105 subunit	NFKB1_HUMAN	47	-73.257	0.26743	cancer
cancer / NAT	Q8IUX4	Q8IUX4	Q8IUX4	-1.4456	1.4456	3.10786e-13	30	Q8IUX4	APOBEC3F	DNA dC->dU-editing enzyme APOBEC-3F	ABC3F_HUMAN	15	-63.286	0.36714	cancer
cancer / NAT	P27824;P27824-2	P27824;P27824-2	P27824	-0.725442	0.725442	3.2214e-13	324	P27824;P27824-2	CANX	Calnexin;Isoform 2 of Calnexin	CALX_HUMAN	55	-39.5188	0.604812	cancer
cancer / NAT	O75818;O75818-2	O75818;O75818-2	O75818	1.03648	1.03648	3.23238e-13	63	O75818;O75818-2	RPP40	Ribonuclease P protein subunit p40;Isoform 2 of Ribonuclease P protein subunit p40	RPP40_HUMAN	14	105.122	2.05122	cancer
cancer / NAT	Q9P2P5	Q9P2P5	Q9P2P5	-1.12746	1.12746	3.56044e-13	24	Q9P2P5	HECW2	E3 ubiquitin-protein ligase HECW2	HECW2_HUMAN	27	-54.228	0.45772	cancer
cancer / NAT	Q13496	Q13496	Q13496	-1.61294	1.61294	3.61103e-13	120	Q13496	MTM1	Myotubularin	MTM1_HUMAN	37	-67.3069	0.326931	cancer
cancer / NAT	Q12770	Q12770	Q12770	-1.41072	1.41072	3.68118e-13	51	Q12770	SCAP	Sterol regulatory element-binding protein cleavage-activating protein	SCAP_HUMAN	36	-62.3875	0.376125	cancer
cancer / NAT	P54920	P54920	P54920	-1.137	1.137	3.68118e-13	150	P54920	NAPA	Alpha-soluble NSF attachment protein	SNAA_HUMAN	26	-54.5295	0.454705	cancer
cancer / NAT	P62487	P62487	P62487	0.910779	0.910779	3.71632e-13	42	P62487	POLR2G	DNA-directed RNA polymerase II subunit RPB7	RPB7_HUMAN	12	88.006	1.88006	cancer
cancer / NAT	Q13191	Q13191	Q13191	2.00312	2.00312	3.76284e-13	96	Q13191	CBLB	E3 ubiquitin-protein ligase CBL-B	CBLB_HUMAN	40	300.866	4.00866	cancer
cancer / NAT	P48681	P48681	P48681	-0.613101	0.613101	3.79231e-13	318	P48681	NES	Nestin	NEST_HUMAN	89	-34.621	0.65379	cancer
cancer / NAT	Q9BZG8	Q9BZG8	Q9BZG8	1.56246	1.56246	3.79231e-13	54	Q9BZG8	DPH1	2-(3-amino-3-carboxypropyl)histidine synthase subunit 1	DPH1_HUMAN	20	195.357	2.95357	cancer
cancer / NAT	Q12830	Q12830	Q12830	0.522693	0.522693	4.00259e-13	234	Q12830	BPTF	Nucleosome-remodeling factor subunit BPTF	BPTF_HUMAN	100	43.6634	1.43663	cancer
cancer / NAT	Q16270	Q16270	Q16270	-0.899078	0.899078	4.27193e-13	78	Q16270	IGFBP7	Insulin-like growth factor-binding protein 7	IBP7_HUMAN	17	-46.3771	0.536229	cancer
cancer / NAT	Q9UKR5	Q9UKR5	Q9UKR5	-2.50706	2.50706	4.36576e-13	18	Q9UKR5	ERG28	Probable ergosterol biosynthetic protein 28	ERG28_HUMAN	3	-82.4086	0.175914	cancer
cancer / NAT	Q9NWY4	Q9NWY4	Q9NWY4	1.41274	1.41274	4.52578e-13	108	Q9NWY4	HPF1	Histone PARylation factor 1	HPF1_HUMAN	25	166.242	2.66242	cancer
cancer / NAT	Q13485	Q13485	Q13485	-1.10255	1.10255	4.78997e-13	60	Q13485	SMAD4	Mothers against decapentaplegic homolog 4	SMAD4_HUMAN	19	-53.4309	0.465691	cancer
cancer / NAT	Q13425	Q13425	Q13425	-2.07639	2.07639	4.79817e-13	87	Q13425	SNTB2	Beta-2-syntrophin	SNTB2_HUMAN	27	-76.2893	0.237107	cancer
cancer / NAT	P14207	P14207	P14207	-2.37979	2.37979	4.92823e-13	75	P14207	FOLR2	Folate receptor beta	FOLR2_HUMAN	17	-80.7862	0.192138	cancer
cancer / NAT	P40925-3	P40925-3	P40925	-0.219848	0.219848	4.96592e-13	150	P40925-3	MDH1	Isoform 3 of Malate dehydrogenase, cytoplasmic	MDHC_HUMAN	28	-14.1344	0.858656	cancer
cancer / NAT	Q9Y285	Q9Y285	Q9Y285	1.1455	1.1455	5.17984e-13	201	Q9Y285	FARSA	Phenylalanine--tRNA ligase alpha subunit	SYFA_HUMAN	31	121.222	2.21222	cancer
cancer / NAT	P0C0L5	P0C0L5	P0C0L5	-1.69793	1.69793	5.38469e-13	27	P0C0L5	C4B	Complement C4-B	CO4B_HUMAN	5	-69.1773	0.308227	cancer
cancer / NAT	P98174	P98174	P98174	2.06342	2.06342	5.45248e-13	108	P98174	FGD1	FYVE, RhoGEF and PH domain-containing protein 1	FGD1_HUMAN	42	317.975	4.17975	cancer
cancer / NAT	Q9NX74	Q9NX74	Q9NX74	1.01585	1.01585	5.60051e-13	84	Q9NX74	DUS2	tRNA-dihydrouridine(20) synthase [NAD(P)+]-like	DUS2L_HUMAN	31	102.209	2.02209	cancer
cancer / NAT	P22626	P22626	P22626	1.0944	1.0944	5.69424e-13	276	P22626	HNRNPA2B1	Heterogeneous nuclear ribonucleoproteins A2/B1	ROA2_HUMAN	41	113.525	2.13525	cancer
cancer / NAT	Q9H6R3	Q9H6R3	Q9H6R3	-0.350983	0.350983	5.81426e-13	96	Q9H6R3	ACSS3	Acyl-CoA synthetase short-chain family member 3, mitochondrial	ACSS3_HUMAN	31	-21.595	0.78405	cancer
cancer / NAT	Q86Y82	Q86Y82	Q86Y82	-0.842359	0.842359	5.84213e-13	45	Q86Y82	STX12	Syntaxin-12	STX12_HUMAN	10	-44.2269	0.557731	cancer
cancer / NAT	P49675	P49675	P49675	-4.14897	4.14897	6.1243e-13	69	P49675	STAR	Steroidogenic acute regulatory protein, mitochondrial	STAR_HUMAN	18	-94.3632	0.0563682	cancer
cancer / NAT	O95967	O95967	O95967	-1.12498	1.12498	6.21625e-13	48	O95967	EFEMP2	EGF-containing fibulin-like extracellular matrix protein 2	FBLN4_HUMAN	17	-54.1491	0.458509	cancer
cancer / NAT	P26885	P26885	P26885	-1.33269	1.33269	6.23356e-13	78	P26885	FKBP2	Peptidyl-prolyl cis-trans isomerase FKBP2	FKBP2_HUMAN	13	-60.2973	0.397027	cancer
cancer / NAT	Q9NQI0	Q9NQI0	Q9NQI0	-1.86073	1.86073	6.25068e-13	138	Q9NQI0	DDX4	Probable ATP-dependent RNA helicase DDX4	DDX4_HUMAN	43	-72.4663	0.275337	cancer
cancer / NAT	P02679;P02679-2	P02679;P02679-2	P02679	-0.803017	0.803017	6.39988e-13	249	P02679;P02679-2	FGG	Fibrinogen gamma chain;Isoform Gamma-A of Fibrinogen gamma chain	FIBG_HUMAN	35	-42.6851	0.573149	cancer
cancer / NAT	P41091	P41091	P41091	0.838963	0.838963	6.47188e-13	36	P41091	EIF2S3	Eukaryotic translation initiation factor 2 subunit 3	IF2G_HUMAN	5	78.8764	1.78876	cancer
cancer / NAT	Q8N1G4	Q8N1G4	Q8N1G4	1.28995	1.28995	6.62796e-13	210	Q8N1G4	LRRC47	Leucine-rich repeat-containing protein 47	LRC47_HUMAN	47	144.52	2.4452	cancer
cancer / NAT	Q03135-2	Q03135-2	Q03135	-3.09636	3.09636	6.85041e-13	39	Q03135-2	CAV1	Isoform 2 of Caveolin-1	CAV1_HUMAN	8	-88.3076	0.116924	cancer
cancer / NAT	P32455	P32455	P32455	0.732382	0.732382	7.04337e-13	213	P32455	GBP1	Guanylate-binding protein 1	GBP1_HUMAN	37	66.138	1.66138	cancer
cancer / NAT	P08579	P08579	P08579	1.05496	1.05496	7.09771e-13	66	P08579	SNRPB2	U2 small nuclear ribonucleoprotein B''	RU2B_HUMAN	12	107.766	2.07766	cancer
cancer / NAT	Q15006	Q15006	Q15006	0.90106	0.90106	7.35494e-13	39	Q15006	EMC2	ER membrane protein complex subunit 2	EMC2_HUMAN	13	86.7437	1.86744	cancer
cancer / NAT	Q01740	Q01740	Q01740	-2.83607	2.83607	7.47084e-13	57	Q01740	FMO1	Dimethylaniline monooxygenase [N-oxide-forming] 1	FMO1_HUMAN	23	-85.9958	0.140042	cancer
cancer / NAT	Q9BYC5	Q9BYC5	Q9BYC5	1.18517	1.18517	8.30064e-13	108	Q9BYC5	FUT8	Alpha-(1,6)-fucosyltransferase	FUT8_HUMAN	37	127.391	2.27391	cancer
cancer / NAT	Q14999	Q14999	Q14999	-1.21077	1.21077	8.35247e-13	141	Q14999	CUL7	Cullin-7	CUL7_HUMAN	51	-56.7961	0.432039	cancer
cancer / NAT	O14936-3	O14936-3	O14936	-1.18566	1.18566	8.37995e-13	150	O14936-3	CASK	Isoform 3 of Peripheral plasma membrane protein CASK	CSKP_HUMAN	47	-56.0377	0.439623	cancer
cancer / NAT	Q96J02;Q96J02-2	Q96J02;Q96J02-2	Q96J02	-0.603001	0.603001	8.49244e-13	96	Q96J02;Q96J02-2	ITCH	E3 ubiquitin-protein ligase Itchy homolog;Isoform 2 of E3 ubiquitin-protein ligase Itchy homolog	ITCH_HUMAN	34	-34.1617	0.658383	cancer
cancer / NAT	Q01804	Q01804	Q01804	1.09862	1.09862	8.55897e-13	195	Q01804	OTUD4	OTU domain-containing protein 4	OTUD4_HUMAN	50	114.15	2.1415	cancer
cancer / NAT	Q8WUD4	Q8WUD4	Q8WUD4	1.30058	1.30058	8.55897e-13	93	Q8WUD4	CCDC12	Coiled-coil domain-containing protein 12	CCD12_HUMAN	17	146.328	2.46328	cancer
cancer / NAT	Q96H79	Q96H79	Q96H79	-1.08137	1.08137	8.58645e-13	45	Q96H79	ZC3HAV1L	Zinc finger CCCH-type antiviral protein 1-like	ZCCHL_HUMAN	16	-52.7422	0.472578	cancer
cancer / NAT	Q9HBR0	Q9HBR0	Q9HBR0	-1.07736	1.07736	8.70668e-13	117	Q9HBR0	SLC38A10	Putative sodium-coupled neutral amino acid transporter 10	S38AA_HUMAN	49	-52.6105	0.473895	cancer
cancer / NAT	Q9Y6X4	Q9Y6X4	Q9Y6X4	-1.77872	1.77872	9.13162e-13	93	Q9Y6X4	FAM169A	Soluble lamin-associated protein of 75 kDa	F169A_HUMAN	33	-70.8559	0.291441	cancer
cancer / NAT	P61221	P61221	P61221	0.762597	0.762597	9.44312e-13	237	P61221	ABCE1	ATP-binding cassette sub-family E member 1	ABCE1_HUMAN	50	69.6541	1.69654	cancer
cancer / NAT	P23921	P23921	P23921	1.20227	1.20227	9.58011e-13	153	P23921	RRM1	Ribonucleoside-diphosphate reductase large subunit	RIR1_HUMAN	45	130.102	2.30102	cancer
cancer / NAT	Q2TAA2	Q2TAA2	Q2TAA2	-1.59259	1.59259	9.63452e-13	42	Q2TAA2	IAH1	Isoamyl acetate-hydrolyzing esterase 1 homolog	IAH1_HUMAN	11	-66.8424	0.331576	cancer
cancer / NAT	P25440;P25440-2	P25440;P25440-2	P25440	0.84319	0.84319	9.71389e-13	123	P25440;P25440-2	BRD2	Bromodomain-containing protein 2;Isoform 2 of Bromodomain-containing protein 2	BRD2_HUMAN	41	79.4013	1.79401	cancer
cancer / NAT	O60506	O60506	O60506	0.949473	0.949473	9.94406e-13	192	O60506	SYNCRIP	Heterogeneous nuclear ribonucleoprotein Q	HNRPQ_HUMAN	33	93.1167	1.93117	cancer
cancer / NAT	Q13564;Q13564-2	Q13564;Q13564-2	Q13564	0.813742	0.813742	1.04355e-12	186	Q13564;Q13564-2	NAE1	NEDD8-activating enzyme E1 regulatory subunit;Isoform 2 of NEDD8-activating enzyme E1 regulatory subunit	ULA1_HUMAN	37	75.7765	1.75776	cancer
cancer / NAT	Q5R3I4	Q5R3I4	Q5R3I4	-0.87074	0.87074	1.06335e-12	84	Q5R3I4	TTC38	Tetratricopeptide repeat protein 38	TTC38_HUMAN	21	-45.3134	0.546866	cancer
cancer / NAT	P05111	P05111	P05111	-4.47517	4.47517	1.09004e-12	51	P05111	INHA	Inhibin alpha chain	INHA_HUMAN	14	-95.5039	0.0449613	cancer
cancer / NAT	Q9UDY8	Q9UDY8	Q9UDY8	0.513744	0.513744	1.09902e-12	60	Q9UDY8	MALT1	Mucosa-associated lymphoid tissue lymphoma translocation protein 1	MALT1_HUMAN	35	42.775	1.42775	cancer
cancer / NAT	Q9HAT2	Q9HAT2	Q9HAT2	-1.40569	1.40569	1.11685e-12	75	Q9HAT2	SIAE	Sialate O-acetylesterase	SIAE_HUMAN	21	-62.2563	0.377437	cancer
cancer / NAT	Q08AM6	Q08AM6	Q08AM6	-0.4484	0.4484	1.11836e-12	156	Q08AM6	VAC14	Protein VAC14 homolog	VAC14_HUMAN	43	-26.7145	0.732855	cancer
cancer / NAT	O15164	O15164	O15164	1.4937	1.4937	1.12393e-12	156	O15164	TRIM24	Transcription intermediary factor 1-alpha	TIF1A_HUMAN	49	181.61	2.8161	cancer
cancer / NAT	Q6PJT7-2;Q6PJT7-9	Q6PJT7-2;Q6PJT7-9	Q6PJT7	1.11196	1.11196	1.12502e-12	189	Q6PJT7-2;Q6PJT7-9	ZC3H14	Isoform 2 of Zinc finger CCCH domain-containing protein 14;Isoform 9 of Zinc finger CCCH domain-containing protein 14	ZC3HE_HUMAN	42	116.14	2.1614	cancer
cancer / NAT	Q9Y5L0;Q9Y5L0-3	Q9Y5L0;Q9Y5L0-3	Q9Y5L0	0.501359	0.501359	1.12532e-12	156	Q9Y5L0;Q9Y5L0-3	TNPO3	Transportin-3;Isoform 3 of Transportin-3	TNPO3_HUMAN	39	41.5547	1.41555	cancer
cancer / NAT	Q69YN4	Q69YN4	Q69YN4	1.17587	1.17587	1.13294e-12	165	Q69YN4	VIRMA	Protein virilizer homolog	VIR_HUMAN	59	125.93	2.2593	cancer
cancer / NAT	Q13769	Q13769	Q13769	0.988612	0.988612	1.15211e-12	141	Q13769	THOC5	THO complex subunit 5 homolog	THOC5_HUMAN	42	98.4275	1.98428	cancer
cancer / NAT	O95302	O95302	O95302	-1.05343	1.05343	1.16764e-12	84	O95302	FKBP9	Peptidyl-prolyl cis-trans isomerase FKBP9	FKBP9_HUMAN	24	-51.8178	0.481822	cancer
cancer / NAT	P04004	P04004	P04004	-0.813539	0.813539	1.17799e-12	138	P04004	VTN	Vitronectin	VTNC_HUMAN	29	-43.1016	0.568984	cancer
cancer / NAT	Q8N3E9	Q8N3E9	Q8N3E9	-1.88157	1.88157	1.20991e-12	84	Q8N3E9	PLCD3	1-phosphatidylinositol 4,5-bisphosphate phosphodiesterase delta-3	PLCD3_HUMAN	31	-72.8613	0.271387	cancer
cancer / NAT	P23284	P23284	P23284	-0.527606	0.527606	1.28134e-12	162	P23284	PPIB	Peptidyl-prolyl cis-trans isomerase B	PPIB_HUMAN	21	-30.6295	0.693705	cancer
cancer / NAT	P63244	P63244	P63244	0.946243	0.946243	1.28145e-12	183	P63244	RACK1	Receptor of activated protein C kinase 1	RACK1_HUMAN	26	92.6848	1.92685	cancer
cancer / NAT	Q29RF7	Q29RF7	Q29RF7	0.773868	0.773868	1.31933e-12	258	Q29RF7	PDS5A	Sister chromatid cohesion protein PDS5 homolog A	PDS5A_HUMAN	76	70.9848	1.70985	cancer
cancer / NAT	Q9BTV4	Q9BTV4	Q9BTV4	-1.10208	1.10208	1.32276e-12	132	Q9BTV4	TMEM43	Transmembrane protein 43	TMM43_HUMAN	29	-53.4155	0.465845	cancer
cancer / NAT	Q68DQ2	Q68DQ2	Q68DQ2	-2.21989	2.21989	1.35445e-12	120	Q68DQ2	CRYBG3	Very large A-kinase anchor protein	CRBG3_HUMAN	106	-78.5342	0.214658	cancer
cancer / NAT	P30046	P30046	P30046	1.24275	1.24275	1.37035e-12	81	P30046	DDT	D-dopachrome decarboxylase	DOPD_HUMAN	15	136.649	2.36649	cancer
cancer / NAT	Q8N436	Q8N436	Q8N436	-0.915549	0.915549	1.37248e-12	51	Q8N436	CPXM2	Inactive carboxypeptidase-like protein X2	CPXM2_HUMAN	24	-46.9858	0.530142	cancer
cancer / NAT	Q5VUA4	Q5VUA4	Q5VUA4	0.633726	0.633726	1.37248e-12	177	Q5VUA4	ZNF318	Zinc finger protein 318	ZN318_HUMAN	85	55.1567	1.55157	cancer
cancer / NAT	Q15459	Q15459	Q15459	0.954035	0.954035	1.38841e-12	270	Q15459	SF3A1	Splicing factor 3A subunit 1	SF3A1_HUMAN	53	93.7283	1.93728	cancer
cancer / NAT	Q7Z6J4	Q7Z6J4	Q7Z6J4	1.13792	1.13792	1.39186e-12	36	Q7Z6J4	FGD2	FYVE, RhoGEF and PH domain-containing protein 2	FGD2_HUMAN	26	120.064	2.20064	cancer
cancer / NAT	Q9H9P8;Q9H9P8-2	Q9H9P8;Q9H9P8-2	Q9H9P8	1.29526	1.29526	1.40516e-12	87	Q9H9P8;Q9H9P8-2	L2HGDH	L-2-hydroxyglutarate dehydrogenase, mitochondrial;Isoform 2 of L-2-hydroxyglutarate dehydrogenase, mitochondrial	L2HDH_HUMAN	19	145.421	2.45421	cancer
cancer / NAT	Q9C0C9	Q9C0C9	Q9C0C9	0.554202	0.554202	1.41967e-12	246	Q9C0C9	UBE2O	(E3-independent) E2 ubiquitin-conjugating enzyme	UBE2O_HUMAN	71	46.8356	1.46836	cancer
cancer / NAT	Q9HCK8	Q9HCK8	Q9HCK8	1.13187	1.13187	1.43337e-12	156	Q9HCK8	CHD8	Chromodomain-helicase-DNA-binding protein 8	CHD8_HUMAN	84	119.142	2.19142	cancer
cancer / NAT	Q13094	Q13094	Q13094	1.21457	1.21457	1.43421e-12	102	Q13094	LCP2	Lymphocyte cytosolic protein 2	LCP2_HUMAN	30	132.072	2.32072	cancer
cancer / NAT	Q8TC12	Q8TC12	Q8TC12	-2.34923	2.34923	1.44918e-12	108	Q8TC12	RDH11	Retinol dehydrogenase 11	RDH11_HUMAN	18	-80.3749	0.196251	cancer
cancer / NAT	O95248-4;O95248-5	O95248-4;O95248-5	O95248	-0.894337	0.894337	1.45868e-12	150	O95248-4;O95248-5	SBF1	Isoform 4 of Myotubularin-related protein 5;Isoform 5 of Myotubularin-related protein 5	MTMR5_HUMAN	54	-46.2006	0.537994	cancer
cancer / NAT	Q9BXB4	Q9BXB4	Q9BXB4	-0.548274	0.548274	1.4999e-12	132	Q9BXB4	OSBPL11	Oxysterol-binding protein-related protein 11	OSB11_HUMAN	37	-31.6162	0.683838	cancer
cancer / NAT	Q5VV41	Q5VV41	Q5VV41	1.6869	1.6869	1.50483e-12	93	Q5VV41	ARHGEF16	Rho guanine nucleotide exchange factor 16	ARHGG_HUMAN	29	221.964	3.21964	cancer
cancer / NAT	P01859	P01859	P01859	-1.224	1.224	1.51325e-12	132	P01859	IGHG2	Immunoglobulin heavy constant gamma 2	IGHG2_HUMAN	23	-57.1906	0.428094	cancer
cancer / NAT	Q12979;Q12979-4	Q12979;Q12979-4	Q12979	0.668781	0.668781	1.5301e-12	126	Q12979;Q12979-4	ABR	Active breakpoint cluster region-related protein;Isoform 4 of Active breakpoint cluster region-related protein	ABR_HUMAN	30	58.9729	1.58973	cancer
cancer / NAT	Q969N2;Q969N2-5	Q969N2;Q969N2-5	Q969N2	-1.02174	1.02174	1.62771e-12	96	Q969N2;Q969N2-5	PIGT	GPI transamidase component PIG-T;Isoform 5 of GPI transamidase component PIG-T	PIGT_HUMAN	22	-50.7478	0.492522	cancer
cancer / NAT	P40938	P40938	P40938	1.27554	1.27554	1.6335e-12	156	P40938	RFC3	Replication factor C subunit 3	RFC3_HUMAN	31	142.09	2.4209	cancer
cancer / NAT	Q9GZM7	Q9GZM7	Q9GZM7	-1.02626	1.02626	1.73016e-12	123	Q9GZM7	TINAGL1	Tubulointerstitial nephritis antigen-like	TINAL_HUMAN	24	-50.902	0.49098	cancer
cancer / NAT	Q96C86	Q96C86	Q96C86	-0.414202	0.414202	1.82975e-12	87	Q96C86	DCPS	m7GpppX diphosphatase	DCPS_HUMAN	20	-24.9565	0.750435	cancer
cancer / NAT	P34896	P34896	P34896	0.665899	0.665899	1.84268e-12	132	P34896	SHMT1	Serine hydroxymethyltransferase, cytosolic	GLYC_HUMAN	27	58.6556	1.58656	cancer
cancer / NAT	Q14C86-2	Q14C86-2	Q14C86	0.33198	0.33198	1.86324e-12	192	Q14C86-2	GAPVD1	Isoform 2 of GTPase-activating protein and VPS9 domain-containing protein 1	GAPD1_HUMAN	68	25.874	1.25874	cancer
cancer / NAT	P62736	P62736	P62736	-0.210408	0.210408	1.88908e-12	162	P62736	ACTA2	Actin, aortic smooth muscle	ACTA_HUMAN	16	-13.5707	0.864293	cancer
cancer / NAT	Q13627;Q13627-2	Q13627;Q13627-2	Q13627	0.952679	0.952679	1.94303e-12	96	Q13627;Q13627-2	DYRK1A	Dual specificity tyrosine-phosphorylation-regulated kinase 1A;Isoform 1 of Dual specificity tyrosine-phosphorylation-regulated kinase 1A	DYR1A_HUMAN	29	93.5464	1.93546	cancer
cancer / NAT	P35221	P35221	P35221	-0.537366	0.537366	1.95208e-12	219	P35221	CTNNA1	Catenin alpha-1	CTNA1_HUMAN	51	-31.0972	0.689028	cancer
cancer / NAT	Q96K17	Q96K17	Q96K17	0.62195	0.62195	1.97761e-12	105	Q96K17	BTF3L4	Transcription factor BTF3 homolog 4	BT3L4_HUMAN	19	53.8954	1.53895	cancer
cancer / NAT	P49916;P49916-3	P49916;P49916-3	P49916	1.04562	1.04562	1.98316e-12	249	P49916;P49916-3	LIG3	DNA ligase 3;Isoform 3 of DNA ligase 3	DNLI3_HUMAN	61	106.426	2.06426	cancer
cancer / NAT	Q9H2D6-2	Q9H2D6-2	Q9H2D6	-1.26373	1.26373	1.99111e-12	171	Q9H2D6-2	TRIOBP	Isoform 3 of TRIO and F-actin-binding protein	TARA_HUMAN	63	-58.3533	0.416467	cancer
cancer / NAT	Q8WUH6	Q8WUH6	Q8WUH6	-0.878617	0.878617	2.03864e-12	39	Q8WUH6	TMEM263	Transmembrane protein 263	TM263_HUMAN	9	-45.6111	0.543889	cancer
cancer / NAT	Q9Y303-2;Q9Y303-3	Q9Y303-2;Q9Y303-3	Q9Y303	-0.76119	0.76119	2.05186e-12	75	Q9Y303-2;Q9Y303-3	AMDHD2	Isoform 2 of N-acetylglucosamine-6-phosphate deacetylase;Isoform 3 of N-acetylglucosamine-6-phosphate deacetylase	NAGA_HUMAN	18	-40.9991	0.590009	cancer
cancer / NAT	Q96PD5	Q96PD5	Q96PD5	-1.78644	1.78644	2.08342e-12	102	Q96PD5	PGLYRP2	N-acetylmuramoyl-L-alanine amidase	PGRP2_HUMAN	17	-71.0114	0.289886	cancer
cancer / NAT	Q96HP0	Q96HP0	Q96HP0	-0.712196	0.712196	2.1427e-12	222	Q96HP0	DOCK6	Dedicator of cytokinesis protein 6	DOCK6_HUMAN	77	-38.961	0.61039	cancer
cancer / NAT	Q13884	Q13884	Q13884	-1.25397	1.25397	2.15366e-12	87	Q13884	SNTB1	Beta-1-syntrophin	SNTB1_HUMAN	30	-58.0706	0.419294	cancer
cancer / NAT	Q8N4N3	Q8N4N3	Q8N4N3	-1.66979	1.66979	2.1651e-12	69	Q8N4N3	KLHL36	Kelch-like protein 36	KLH36_HUMAN	23	-68.5701	0.314299	cancer
cancer / NAT	Q9UGU0;Q9UGU0-2	Q9UGU0;Q9UGU0-2	Q9UGU0	0.85526	0.85526	2.17475e-12	168	Q9UGU0;Q9UGU0-2	TCF20	Transcription factor 20;Isoform 2 of Transcription factor 20	TCF20_HUMAN	56	80.9084	1.80908	cancer
cancer / NAT	Q9UK22	Q9UK22	Q9UK22	-1.14152	1.14152	2.20846e-12	39	Q9UK22	FBXO2	F-box only protein 2	FBX2_HUMAN	15	-54.6718	0.453282	cancer
cancer / NAT	O14791;O14791-2;O14791-3	O14791;O14791-2;O14791-3	O14791	-1.64804	1.64804	2.26167e-12	45	O14791;O14791-2;O14791-3	APOL1	Apolipoprotein L1;Isoform 2 of Apolipoprotein L1;Isoform 3 of Apolipoprotein L1	APOL1_HUMAN	14	-68.0928	0.319072	cancer
cancer / NAT	Q9BX67	Q9BX67	Q9BX67	-3.03093	3.03093	2.27817e-12	48	Q9BX67	JAM3	Junctional adhesion molecule C	JAM3_HUMAN	13	-87.7651	0.122349	cancer
cancer / NAT	O00566	O00566	O00566	0.626859	0.626859	2.34266e-12	123	O00566	MPHOSPH10	U3 small nucleolar ribonucleoprotein protein MPP10	MPP10_HUMAN	36	54.42	1.5442	cancer
cancer / NAT	Q9UKU7	Q9UKU7	Q9UKU7	-1.15854	1.15854	2.36597e-12	60	Q9UKU7	ACAD8	Isobutyryl-CoA dehydrogenase, mitochondrial	ACAD8_HUMAN	22	-55.2034	0.447966	cancer
cancer / NAT	O94952;O94952-1	O94952;O94952-1	O94952	-1.92338	1.92338	2.41888e-12	87	O94952;O94952-1	FBXO21	F-box only protein 21;Isoform 2 of F-box only protein 21	FBX21_HUMAN	22	-73.6364	0.263636	cancer
cancer / NAT	Q9NVE5;Q9NVE5-3	Q9NVE5;Q9NVE5-3	Q9NVE5	-1.16063	1.16063	2.42513e-12	72	Q9NVE5;Q9NVE5-3	USP40	Ubiquitin carboxyl-terminal hydrolase 40;Isoform 3 of Ubiquitin carboxyl-terminal hydrolase 40	UBP40_HUMAN	42	-55.2682	0.447318	cancer
cancer / NAT	O75563	O75563	O75563	1.34865	1.34865	2.45249e-12	48	O75563	SKAP2	Src kinase-associated phosphoprotein 2	SKAP2_HUMAN	16	154.673	2.54673	cancer
cancer / NAT	Q8IZ52	Q8IZ52	Q8IZ52	0.336513	0.336513	2.45361e-12	75	Q8IZ52	CHPF	Chondroitin sulfate synthase 2	CHSS2_HUMAN	26	26.2701	1.2627	cancer
cancer / NAT	Q92734;Q92734-2	Q92734;Q92734-2	Q92734	-0.320753	0.320753	2.50996e-12	123	Q92734;Q92734-2	TFG	Protein TFG;Isoform 2 of Protein TFG	TFG_HUMAN	21	-19.9348	0.800652	cancer
cancer / NAT	P51580	P51580	P51580	-0.938609	0.938609	2.53756e-12	75	P51580	TPMT	Thiopurine S-methyltransferase	TPMT_HUMAN	24	-47.8264	0.521736	cancer
cancer / NAT	Q9BXN1	Q9BXN1	Q9BXN1	-0.938613	0.938613	2.54342e-12	120	Q9BXN1	ASPN	Asporin	ASPN_HUMAN	25	-47.8266	0.521734	cancer
cancer / NAT	P21980	P21980	P21980	0.349475	0.349475	2.84886e-12	207	P21980	TGM2	Protein-glutamine gamma-glutamyltransferase 2	TGM2_HUMAN	45	27.4097	1.2741	cancer
cancer / NAT	Q12907	Q12907	Q12907	-0.226935	0.226935	2.86672e-12	156	Q12907	LMAN2	Vesicular integral-membrane protein VIP36	LMAN2_HUMAN	23	-14.5552	0.854448	cancer
cancer / NAT	P14324;P14324-2	P14324;P14324-2	P14324	-0.548202	0.548202	2.90419e-12	81	P14324;P14324-2	FDPS	Farnesyl pyrophosphate synthase;Isoform 2 of Farnesyl pyrophosphate synthase	FPPS_HUMAN	16	-31.6128	0.683872	cancer
cancer / NAT	Q92547	Q92547	Q92547	2.71206	2.71206	2.90953e-12	87	Q92547	TOPBP1	DNA topoisomerase 2-binding protein 1	TOPB1_HUMAN	56	555.256	6.55256	cancer
cancer / NAT	Q9H6F5	Q9H6F5	Q9H6F5	0.96012	0.96012	3.00126e-12	72	Q9H6F5	CCDC86	Coiled-coil domain-containing protein 86	CCD86_HUMAN	22	94.5472	1.94547	cancer
cancer / NAT	Q9Y5T5-2	Q9Y5T5-2	Q9Y5T5	1.55768	1.55768	3.0771e-12	177	Q9Y5T5-2	USP16	Isoform 2 of Ubiquitin carboxyl-terminal hydrolase 16	UBP16_HUMAN	45	194.381	2.94381	cancer
cancer / NAT	Q99543	Q99543	Q99543	1.09985	1.09985	3.11782e-12	126	Q99543	DNAJC2	DnaJ homolog subfamily C member 2	DNJC2_HUMAN	44	114.332	2.14332	cancer
cancer / NAT	Q15036	Q15036	Q15036	-0.506251	0.506251	3.12939e-12	69	Q15036	SNX17	Sorting nexin-17	SNX17_HUMAN	22	-29.5951	0.704049	cancer
cancer / NAT	P52732	P52732	P52732	1.86721	1.86721	3.12939e-12	180	P52732	KIF11	Kinesin-like protein KIF11	KIF11_HUMAN	62	264.826	3.64826	cancer
cancer / NAT	O60762	O60762	O60762	-0.641688	0.641688	3.14502e-12	78	O60762	DPM1	Dolichol-phosphate mannosyltransferase subunit 1	DPM1_HUMAN	21	-35.9038	0.640962	cancer
cancer / NAT	P0DOX7	P0DOX7	P0DOX7	-1.03703	1.03703	3.16086e-12	84	P0DOX7	NaN	Immunoglobulin kappa light chain	IGK_HUMAN	17	-51.2671	0.487329	cancer
cancer / NAT	O75844	O75844	O75844	-1.03773	1.03773	3.16337e-12	99	O75844	ZMPSTE24	CAAX prenyl protease 1 homolog	FACE1_HUMAN	22	-51.2906	0.487094	cancer
cancer / NAT	Q2TAY7	Q2TAY7	Q2TAY7	0.886157	0.886157	3.17245e-12	141	Q2TAY7	SMU1	WD40 repeat-containing protein SMU1	SMU1_HUMAN	29	84.8247	1.84825	cancer
cancer / NAT	O60613	O60613	O60613	-0.906342	0.906342	3.19602e-12	33	O60613	SELENOF	Selenoprotein F	SEP15_HUMAN	8	-46.6464	0.533536	cancer
cancer / NAT	Q9UNF0	Q9UNF0	Q9UNF0	1.18712	1.18712	3.20543e-12	180	Q9UNF0	PACSIN2	Protein kinase C and casein kinase substrate in neurons protein 2	PACN2_HUMAN	35	127.697	2.27697	cancer
cancer / NAT	P38571;P38571-2	P38571;P38571-2	P38571	0.846736	0.846736	3.21861e-12	51	P38571;P38571-2	LIPA	Lysosomal acid lipase/cholesteryl ester hydrolase;Isoform 2 of Lysosomal acid lipase/cholesteryl ester hydrolase	LICH_HUMAN	11	79.8428	1.79843	cancer
cancer / NAT	P23634-6;P23634-7	P23634-6;P23634-7	P23634	-1.84818	1.84818	3.22859e-12	30	P23634-6;P23634-7	ATP2B4	Isoform XB of Plasma membrane calcium-transporting ATPase 4;Isoform ZB of Plasma membrane calcium-transporting ATPase 4	AT2B4_HUMAN	4	-72.2258	0.277742	cancer
cancer / NAT	Q9BTV5	Q9BTV5	Q9BTV5	-0.174887	0.174887	3.23637e-12	75	Q9BTV5	FSD1	Fibronectin type III and SPRY domain-containing protein 1	FSD1_HUMAN	26	-11.4163	0.885837	cancer
cancer / NAT	P46439	P46439	P46439	-5.36825	5.36825	3.25594e-12	84	P46439	GSTM5	Glutathione S-transferase Mu 5	GSTM5_HUMAN	16	-97.579	0.02421	cancer
cancer / NAT	P06493	P06493	P06493	1.32242	1.32242	3.26848e-12	87	P06493	CDK1	Cyclin-dependent kinase 1	CDK1_HUMAN	22	150.085	2.50085	cancer
cancer / NAT	P17096	P17096	P17096	3.94681	3.94681	3.30115e-12	15	P17096	HMGA1	High mobility group protein HMG-I/HMG-Y	HMGA1_HUMAN	2	1442.09	15.4209	cancer
cancer / NAT	Q9Y4C1	Q9Y4C1	Q9Y4C1	1.53752	1.53752	3.36158e-12	159	Q9Y4C1	KDM3A	Lysine-specific demethylase 3A	KDM3A_HUMAN	62	190.295	2.90295	cancer
cancer / NAT	P20073;P20073-2	P20073;P20073-2	P20073	-0.689512	0.689512	3.38007e-12	141	P20073;P20073-2	ANXA7	Annexin A7;Isoform 2 of Annexin A7	ANXA7_HUMAN	26	-37.9936	0.620064	cancer
cancer / NAT	Q13976	Q13976	Q13976	-2.36092	2.36092	3.40977e-12	60	Q13976	PRKG1	cGMP-dependent protein kinase 1	KGP1_HUMAN	22	-80.5333	0.194667	cancer
cancer / NAT	Q6UWR7	Q6UWR7	Q6UWR7	-2.74653	2.74653	3.4644e-12	75	Q6UWR7	ENPP6	Ectonucleotide pyrophosphatase/phosphodiesterase family member 6	ENPP6_HUMAN	21	-85.0991	0.149009	cancer
cancer / NAT	Q9Y3B9	Q9Y3B9	Q9Y3B9	1.64679	1.64679	3.47971e-12	75	Q9Y3B9	RRP15	RRP15-like protein	RRP15_HUMAN	16	213.135	3.13135	cancer
cancer / NAT	Q9Y5J1	Q9Y5J1	Q9Y5J1	1.31117	1.31117	3.56988e-12	123	Q9Y5J1	UTP18	U3 small nucleolar RNA-associated protein 18 homolog	UTP18_HUMAN	33	148.142	2.48142	cancer
cancer / NAT	Q99439	Q99439	Q99439	1.17639	1.17639	3.64323e-12	93	Q99439	CNN2	Calponin-2	CNN2_HUMAN	17	126.01	2.2601	cancer
cancer / NAT	P09497-2	P09497-2	P09497	-1.51268	1.51268	3.65422e-12	63	P09497-2	CLTB	Isoform Non-brain of Clathrin light chain B	CLCB_HUMAN	12	-64.9541	0.350459	cancer
cancer / NAT	Q8WYJ6	Q8WYJ6	Q8WYJ6	1.94622	1.94622	3.67436e-12	78	Q8WYJ6	2001-09-01	Septin-1	SEPT1_HUMAN	24	285.365	3.85365	cancer
cancer / NAT	P46013-2	P46013-2	P46013	-0.0993443	0.0993443	3.74593e-12	192	P46013-2	MKI67	Isoform Short of Proliferation marker protein Ki-67	KI67_HUMAN	121	-6.65429	0.933457	cancer
cancer / NAT	Q9Y228	Q9Y228	Q9Y228	1.40312	1.40312	3.79464e-12	27	Q9Y228	TRAF3IP3	TRAF3-interacting JNK-activating modulator	T3JAM_HUMAN	19	164.473	2.64473	cancer
cancer / NAT	Q9BXY0	Q9BXY0	Q9BXY0	2.32351	2.32351	3.86624e-12	57	Q9BXY0	MAK16	Protein MAK16 homolog	MAK16_HUMAN	15	400.55	5.0055	cancer
cancer / NAT	Q15428	Q15428	Q15428	1.25377	1.25377	3.88964e-12	99	Q15428	SF3A2	Splicing factor 3A subunit 2	SF3A2_HUMAN	20	138.464	2.38464	cancer
cancer / NAT	P61020	P61020	P61020	-0.574492	0.574492	4.03925e-12	51	P61020	RAB5B	Ras-related protein Rab-5B	RAB5B_HUMAN	11	-32.8477	0.671523	cancer
cancer / NAT	Q96EV2	Q96EV2	Q96EV2	1.00924	1.00924	4.16032e-12	123	Q96EV2	RBM33	RNA-binding protein 33	RBM33_HUMAN	34	101.286	2.01286	cancer
cancer / NAT	P33240;P33240-2	P33240;P33240-2	P33240	1.20362	1.20362	4.20154e-12	117	P33240;P33240-2	CSTF2	Cleavage stimulation factor subunit 2;Isoform 2 of Cleavage stimulation factor subunit 2	CSTF2_HUMAN	23	130.317	2.30317	cancer
cancer / NAT	Q9NVI1	Q9NVI1	Q9NVI1	0.75775	0.75775	4.24958e-12	192	Q9NVI1	FANCI	Fanconi anemia group I protein	FANCI_HUMAN	63	69.0851	1.69085	cancer
cancer / NAT	Q9NUQ7	Q9NUQ7	Q9NUQ7	-0.992946	0.992946	4.34374e-12	123	Q9NUQ7	UFSP2	Ufm1-specific protease 2	UFSP2_HUMAN	29	-49.7549	0.502451	cancer
cancer / NAT	O00154	O00154	O00154	1.33315	1.33315	4.40665e-12	105	O00154	ACOT7	Cytosolic acyl coenzyme A thioester hydrolase	BACH_HUMAN	25	151.952	2.51952	cancer
cancer / NAT	Q5QJ74	Q5QJ74	Q5QJ74	-1.19725	1.19725	4.45247e-12	84	Q5QJ74	TBCEL	Tubulin-specific chaperone cofactor E-like protein	TBCEL_HUMAN	25	-56.3894	0.436106	cancer
cancer / NAT	Q96D15	Q96D15	Q96D15	-0.98461	0.98461	4.70093e-12	72	Q96D15	RCN3	Reticulocalbin-3	RCN3_HUMAN	16	-49.4638	0.505362	cancer
cancer / NAT	Q96HR9-2	Q96HR9-2	Q96HR9	-3.6251	3.6251	4.71432e-12	60	Q96HR9-2	REEP6	Isoform 2 of Receptor expression-enhancing protein 6	REEP6_HUMAN	10	-91.8953	0.0810468	cancer
cancer / NAT	P10515	P10515	P10515	-0.894531	0.894531	4.85705e-12	141	P10515	DLAT	Dihydrolipoyllysine-residue acetyltransferase component of pyruvate dehydrogenase complex, mitochondrial	ODP2_HUMAN	24	-46.2078	0.537922	cancer
cancer / NAT	Q8WU90	Q8WU90	Q8WU90	1.03355	1.03355	4.85735e-12	102	Q8WU90	ZC3H15	Zinc finger CCCH domain-containing protein 15	ZC3HF_HUMAN	29	104.706	2.04706	cancer
cancer / NAT	Q01105	Q01105	Q01105	1.6004	1.6004	4.86179e-12	120	Q01105	SET	Protein SET	SET_HUMAN	20	203.227	3.03227	cancer
cancer / NAT	Q9P2A4	Q9P2A4	Q9P2A4	2.02375	2.02375	4.86201e-12	51	Q9P2A4	ABI3	ABI gene family member 3	ABI3_HUMAN	13	306.639	4.06639	cancer
cancer / NAT	Q16775-2	Q16775-2	Q16775	-2.02775	2.02775	5.09083e-12	87	Q16775-2	HAGH	Isoform 2 of Hydroxyacylglutathione hydrolase, mitochondrial	GLO2_HUMAN	18	-75.4763	0.245237	cancer
cancer / NAT	P16870;P16870-2	P16870;P16870-2	P16870	-3.04494	3.04494	5.10939e-12	54	P16870;P16870-2	CPE	Carboxypeptidase E;Isoform 2 of Carboxypeptidase E	CBPE_HUMAN	20	-87.8833	0.121167	cancer
cancer / NAT	Q9NPJ8-3	Q9NPJ8-3	Q9NPJ8	-1.36141	1.36141	5.18417e-12	63	Q9NPJ8-3	NXT2	Isoform 3 of NTF2-related export protein 2	NXT2_HUMAN	13	-61.0799	0.389201	cancer
cancer / NAT	Q9NYL9	Q9NYL9	Q9NYL9	-0.804785	0.804785	5.18613e-12	102	Q9NYL9	TMOD3	Tropomodulin-3	TMOD3_HUMAN	22	-42.7553	0.572447	cancer
cancer / NAT	P35542	P35542	P35542	-1.48428	1.48428	5.19708e-12	33	P35542	SAA4	Serum amyloid A-4 protein	SAA4_HUMAN	6	-64.2573	0.357427	cancer
cancer / NAT	O75976	O75976	O75976	-1.6015	1.6015	5.24505e-12	99	O75976	CPD	Carboxypeptidase D	CBPD_HUMAN	41	-67.0465	0.329535	cancer
cancer / NAT	Q9HCE1	Q9HCE1	Q9HCE1	-0.677981	0.677981	5.29873e-12	285	Q9HCE1	MOV10	Putative helicase MOV-10	MOV10_HUMAN	65	-37.4961	0.625039	cancer
cancer / NAT	Q8IWZ8	Q8IWZ8	Q8IWZ8	1.06904	1.06904	5.43725e-12	108	Q8IWZ8	SUGP1	SURP and G-patch domain-containing protein 1	SUGP1_HUMAN	39	109.804	2.09804	cancer
cancer / NAT	Q14562	Q14562	Q14562	1.02154	1.02154	5.46866e-12	165	Q14562	DHX8	ATP-dependent RNA helicase DHX8	DHX8_HUMAN	56	103.008	2.03008	cancer
cancer / NAT	P02753	P02753	P02753	-1.77657	1.77657	5.49837e-12	69	P02753	RBP4	Retinol-binding protein 4	RET4_HUMAN	13	-70.8124	0.291876	cancer
cancer / NAT	Q86XP3-2	Q86XP3-2	Q86XP3	0.570136	0.570136	5.5744e-12	243	Q86XP3-2	DDX42	Isoform 2 of ATP-dependent RNA helicase DDX42	DDX42_HUMAN	52	48.4663	1.48466	cancer
cancer / NAT	Q14191	Q14191	Q14191	0.939324	0.939324	5.61777e-12	138	Q14191	WRN	Werner syndrome ATP-dependent helicase	WRN_HUMAN	70	91.7629	1.91763	cancer
cancer / NAT	P42345	P42345	P42345	0.491399	0.491399	5.75608e-12	492	P42345	MTOR	Serine/threonine-protein kinase mTOR	MTOR_HUMAN	136	40.5807	1.40581	cancer
cancer / NAT	Q7Z5R6	Q7Z5R6	Q7Z5R6	1.51075	1.51075	5.8516e-12	63	Q7Z5R6	APBB1IP	Amyloid beta A4 precursor protein-binding family B member 1-interacting protein	AB1IP_HUMAN	19	184.958	2.84958	cancer
cancer / NAT	P68431	P68431	P68431	-1.35953	1.35953	5.87665e-12	114	P68431	HIST1H3A	Histone H3.1	H31_HUMAN	18	-61.0291	0.389709	cancer
cancer / NAT	Q9BWJ5	Q9BWJ5	Q9BWJ5	0.885438	0.885438	5.90712e-12	39	Q9BWJ5	SF3B5	Splicing factor 3B subunit 5	SF3B5_HUMAN	7	84.7325	1.84733	cancer
cancer / NAT	P11117	P11117	P11117	-0.731858	0.731858	5.96706e-12	48	P11117	ACP2	Lysosomal acid phosphatase	PPAL_HUMAN	16	-39.7872	0.602128	cancer
cancer / NAT	O43852;O43852-3	O43852;O43852-3	O43852	-0.59746	0.59746	6.09179e-12	198	O43852;O43852-3	CALU	Calumenin;Isoform 3 of Calumenin	CALU_HUMAN	33	-33.9084	0.660916	cancer
cancer / NAT	Q9BRS2	Q9BRS2	Q9BRS2	1.68695	1.68695	6.27611e-12	90	Q9BRS2	RIOK1	Serine/threonine-protein kinase RIO1	RIOK1_HUMAN	30	221.975	3.21975	cancer
cancer / NAT	Q92608	Q92608	Q92608	0.631806	0.631806	6.50131e-12	309	Q92608	DOCK2	Dedicator of cytokinesis protein 2	DOCK2_HUMAN	95	54.9503	1.5495	cancer
cancer / NAT	Q96HY7	Q96HY7	Q96HY7	1.51888	1.51888	7.04948e-12	171	Q96HY7	DHTKD1	Probable 2-oxoglutarate dehydrogenase E1 component DHKTD1, mitochondrial	DHTK1_HUMAN	37	186.568	2.86568	cancer
cancer / NAT	Q13009	Q13009	Q13009	1.65788	1.65788	7.17585e-12	132	Q13009	TIAM1	T-lymphoma invasion and metastasis-inducing protein 1	TIAM1_HUMAN	61	215.553	3.15553	cancer
cancer / NAT	Q00577	Q00577	Q00577	-1.49422	1.49422	7.19174e-12	75	Q00577	PURA	Transcriptional activator protein Pur-alpha	PURA_HUMAN	16	-64.5028	0.354972	cancer
cancer / NAT	P01033	P01033	P01033	-1.10041	1.10041	7.21557e-12	42	P01033	TIMP1	Metalloproteinase inhibitor 1	TIMP1_HUMAN	7	-53.3615	0.466385	cancer
cancer / NAT	Q9BYW2	Q9BYW2	Q9BYW2	0.92336	0.92336	7.31425e-12	141	Q9BYW2	SETD2	Histone-lysine N-methyltransferase SETD2	SETD2_HUMAN	80	89.6527	1.89653	cancer
cancer / NAT	Q5GLZ8;Q5GLZ8-2	Q5GLZ8;Q5GLZ8-2	Q5GLZ8	-1.25792	1.25792	7.66561e-12	180	Q5GLZ8;Q5GLZ8-2	HERC4	Probable E3 ubiquitin-protein ligase HERC4;Isoform 2 of Probable E3 ubiquitin-protein ligase HERC4	HERC4_HUMAN	57	-58.1853	0.418147	cancer
cancer / NAT	O96019	O96019	O96019	0.961848	0.961848	7.72551e-12	123	O96019	ACTL6A	Actin-like protein 6A	ACL6A_HUMAN	22	94.7803	1.9478	cancer
cancer / NAT	P54760	P54760	P54760	1.41214	1.41214	7.76952e-12	120	P54760	EPHB4	Ephrin type-B receptor 4	EPHB4_HUMAN	37	166.131	2.66131	cancer
cancer / NAT	Q96M96	Q96M96	Q96M96	0.999157	0.999157	7.82048e-12	174	Q96M96	FGD4	FYVE, RhoGEF and PH domain-containing protein 4	FGD4_HUMAN	45	99.8831	1.99883	cancer
cancer / NAT	Q13683-3	Q13683-3	Q13683	-2.05369	2.05369	7.92738e-12	87	Q13683-3	ITGA7	Isoform Alpha-7X1B of Integrin alpha-7	ITA7_HUMAN	31	-75.9132	0.240868	cancer
cancer / NAT	Q9NRW7	Q9NRW7	Q9NRW7	-0.781106	0.781106	8.00593e-12	150	Q9NRW7	VPS45	Vacuolar protein sorting-associated protein 45	VPS45_HUMAN	36	-41.8079	0.581921	cancer
cancer / NAT	Q92828	Q92828	Q92828	-2.00424	2.00424	8.148e-12	75	Q92828	CORO2A	Coronin-2A	COR2A_HUMAN	24	-75.0734	0.249266	cancer
cancer / NAT	P49908	P49908	P49908	-1.96835	1.96835	8.3804e-12	30	P49908	SELENOP	Selenoprotein P	SEPP1_HUMAN	11	-74.4455	0.255545	cancer
cancer / NAT	Q8IWA0	Q8IWA0	Q8IWA0	1.3059	1.3059	8.42855e-12	120	Q8IWA0	WDR75	WD repeat-containing protein 75	WDR75_HUMAN	42	147.238	2.47238	cancer
cancer / NAT	Q99714	Q99714	Q99714	0.97097	0.97097	8.54203e-12	126	Q99714	HSD17B10	3-hydroxyacyl-CoA dehydrogenase type-2	HCD2_HUMAN	18	96.0158	1.96016	cancer
cancer / NAT	Q6VY07	Q6VY07	Q6VY07	-0.896101	0.896101	8.63149e-12	147	Q6VY07	PACS1	Phosphofurin acidic cluster sorting protein 1	PACS1_HUMAN	40	-46.2663	0.537337	cancer
cancer / NAT	P17302	P17302	P17302	-1.27167	1.27167	8.77336e-12	69	P17302	GJA1	Gap junction alpha-1 protein	CXA1_HUMAN	18	-58.582	0.41418	cancer
cancer / NAT	O95810	O95810	O95810	-2.16294	2.16294	8.78417e-12	93	O95810	CAVIN2	Caveolae-associated protein 2	CAVN2_HUMAN	25	-77.6699	0.223301	cancer
cancer / NAT	Q9HD47	Q9HD47	Q9HD47	1.71478	1.71478	8.91696e-12	24	Q9HD47	RANGRF	Ran guanine nucleotide release factor	MOG1_HUMAN	5	228.247	3.28247	cancer
cancer / NAT	Q8NCE2	Q8NCE2	Q8NCE2	1.18549	1.18549	9.0431e-12	102	Q8NCE2	MTMR14	Myotubularin-related protein 14	MTMRE_HUMAN	33	127.441	2.27441	cancer
cancer / NAT	Q9Y6M1;Q9Y6M1-1	Q9Y6M1;Q9Y6M1-1	Q9Y6M1	2.7093	2.7093	9.07409e-12	105	Q9Y6M1;Q9Y6M1-1	IGF2BP2	Insulin-like growth factor 2 mRNA-binding protein 2;Isoform 2 of Insulin-like growth factor 2 mRNA-binding protein 2	IF2B2_HUMAN	25	554.002	6.54002	cancer
cancer / NAT	Q9BVI4	Q9BVI4	Q9BVI4	1.0287	1.0287	9.22241e-12	123	Q9BVI4	NOC4L	Nucleolar complex protein 4 homolog	NOC4L_HUMAN	30	104.019	2.04019	cancer
cancer / NAT	P20290-2	P20290-2	P20290	0.79053	0.79053	9.38202e-12	60	P20290-2	BTF3	Isoform 2 of Transcription factor BTF3	BTF3_HUMAN	15	72.971	1.72971	cancer
cancer / NAT	Q92620	Q92620	Q92620	0.563927	0.563927	9.48746e-12	177	Q92620	DHX38	Pre-mRNA-splicing factor ATP-dependent RNA helicase PRP16	PRP16_HUMAN	65	47.8288	1.47829	cancer
cancer / NAT	P40692	P40692	P40692	1.35158	1.35158	9.48746e-12	156	P40692	MLH1	DNA mismatch repair protein Mlh1	MLH1_HUMAN	53	155.191	2.55191	cancer
cancer / NAT	Q13395	Q13395	Q13395	1.59494	1.59494	9.64608e-12	93	Q13395	TARBP1	Probable methyltransferase TARBP1	TARB1_HUMAN	45	202.083	3.02083	cancer
cancer / NAT	Q9UJA5	Q9UJA5	Q9UJA5	1.59257	1.59257	9.71828e-12	147	Q9UJA5	TRMT6	tRNA (adenine(58)-N(1))-methyltransferase non-catalytic subunit TRM6	TRM6_HUMAN	38	201.586	3.01586	cancer
cancer / NAT	Q5VU43-13	Q5VU43-13	Q5VU43	0.681626	0.681626	9.82817e-12	99	Q5VU43-13	PDE4DIP	Isoform 13 of Myomegalin	MYOME_HUMAN	52	60.3947	1.60395	cancer
cancer / NAT	Q86W92-2	Q86W92-2	Q86W92	-0.642243	0.642243	9.95521e-12	219	Q86W92-2	PPFIBP1	Isoform 2 of Liprin-beta-1	LIPB1_HUMAN	76	-35.9284	0.640716	cancer
cancer / NAT	Q9H3S7	Q9H3S7	Q9H3S7	-0.41665	0.41665	1.01617e-11	291	Q9H3S7	PTPN23	Tyrosine-protein phosphatase non-receptor type 23	PTN23_HUMAN	80	-25.0838	0.749162	cancer
cancer / NAT	O15160	O15160	O15160	1.37653	1.37653	1.01617e-11	72	O15160	POLR1C	DNA-directed RNA polymerases I and III subunit RPAC1	RPAC1_HUMAN	18	159.642	2.59642	cancer
cancer / NAT	Q9Y6H1	Q9Y6H1	Q9Y6H1	1.29454	1.29454	1.01825e-11	27	Q9Y6H1	CHCHD2	Coiled-coil-helix-coiled-coil-helix domain-containing protein 2	CHCH2_HUMAN	5	145.299	2.45299	cancer
cancer / NAT	Q7L775	Q7L775	Q7L775	-2.31925	2.31925	1.0191e-11	78	Q7L775	EPM2AIP1	EPM2A-interacting protein 1	EPMIP_HUMAN	26	-79.9629	0.200371	cancer
cancer / NAT	Q9NQZ2	Q9NQZ2	Q9NQZ2	1.39177	1.39177	1.0217e-11	72	Q9NQZ2	UTP3	Something about silencing protein 10	SAS10_HUMAN	22	162.4	2.624	cancer
cancer / NAT	P13984	P13984	P13984	0.816598	0.816598	1.03081e-11	72	P13984	GTF2F2	General transcription factor IIF subunit 2	T2FB_HUMAN	18	76.1248	1.76125	cancer
cancer / NAT	Q8TDB4	Q8TDB4	Q8TDB4	-4.03938	4.03938	1.03213e-11	51	Q8TDB4	MGARP	Protein MGARP	HUMMR_HUMAN	10	-93.9183	0.060817	cancer
cancer / NAT	O60861	O60861	O60861	-0.410629	0.410629	1.04083e-11	75	O60861	GAS7	Growth arrest-specific protein 7	GAS7_HUMAN	22	-24.7705	0.752295	cancer
cancer / NAT	Q96L91;Q96L91-2;Q96L91-3;Q96L91-5	Q96L91;Q96L91-2;Q96L91-3;Q96L91-5	Q96L91	0.874973	0.874973	1.05349e-11	231	Q96L91;Q96L91-2;Q96L91-3;Q96L91-5	EP400	E1A-binding protein p400;Isoform 2 of E1A-binding protein p400;Isoform 3 of E1A-binding protein p400;Isoform 5 of E1A-binding protein p400	EP400_HUMAN	98	83.3973	1.83397	cancer
cancer / NAT	Q71RC2-3	Q71RC2-3	Q71RC2	1.82159	1.82159	1.05386e-11	105	Q71RC2-3	LARP4	Isoform 3 of La-related protein 4	LARP4_HUMAN	25	253.47	3.5347	cancer
cancer / NAT	Q8IUZ5	Q8IUZ5	Q8IUZ5	-0.798768	0.798768	1.05503e-11	51	Q8IUZ5	PHYKPL	5-phosphohydroxy-L-lysine phospho-lyase	AT2L2_HUMAN	19	-42.516	0.57484	cancer
cancer / NAT	Q9UGN5-2	Q9UGN5-2	Q9UGN5	1.42095	1.42095	1.06773e-11	120	Q9UGN5-2	PARP2	Isoform 2 of Poly [ADP-ribose] polymerase 2	PARP2_HUMAN	32	167.762	2.67762	cancer
cancer / NAT	Q9UHN6	Q9UHN6	Q9UHN6	-1.28526	1.28526	1.08727e-11	72	Q9UHN6	TMEM2	Cell surface hyaluronidase	TMEM2_HUMAN	39	-58.9703	0.410297	cancer
cancer / NAT	Q9UPN4;Q9UPN4-2	Q9UPN4;Q9UPN4-2	Q9UPN4	1.04648	1.04648	1.1008e-11	159	Q9UPN4;Q9UPN4-2	CEP131	Centrosomal protein of 131 kDa;Isoform 2 of Centrosomal protein of 131 kDa	CP131_HUMAN	54	106.549	2.06549	cancer
cancer / NAT	Q9Y3F4;Q9Y3F4-2	Q9Y3F4;Q9Y3F4-2	Q9Y3F4	0.713649	0.713649	1.1072e-11	153	Q9Y3F4;Q9Y3F4-2	STRAP	Serine-threonine kinase receptor-associated protein;Isoform 2 of Serine-threonine kinase receptor-associated protein	STRAP_HUMAN	30	63.9947	1.63995	cancer
cancer / NAT	Q9UIQ6;Q9UIQ6-2;Q9UIQ6-3	Q9UIQ6;Q9UIQ6-2;Q9UIQ6-3	Q9UIQ6	-0.677371	0.677371	1.1072e-11	123	Q9UIQ6;Q9UIQ6-2;Q9UIQ6-3	LNPEP	Leucyl-cystinyl aminopeptidase;Isoform 2 of Leucyl-cystinyl aminopeptidase;Isoform 3 of Leucyl-cystinyl aminopeptidase	LCAP_HUMAN	31	-37.4696	0.625304	cancer
cancer / NAT	Q96CD0	Q96CD0	Q96CD0	-1.70433	1.70433	1.14956e-11	33	Q96CD0	FBXL8	F-box/LRR-repeat protein 8	FBXL8_HUMAN	17	-69.3136	0.306864	cancer
cancer / NAT	P17812	P17812	P17812	0.838445	0.838445	1.15942e-11	195	P17812	CTPS1	CTP synthase 1	PYRG1_HUMAN	44	78.8121	1.78812	cancer
cancer / NAT	Q8N201	Q8N201	Q8N201	-1.9656	1.9656	1.1648e-11	246	Q8N201	INTS1	Integrator complex subunit 1	INT1_HUMAN	86	-74.3967	0.256033	cancer
cancer / NAT	Q9BXV9	Q9BXV9	Q9BXV9	0.870878	0.870878	1.20466e-11	30	Q9BXV9	GON7	EKC/KEOPS complex subunit GON7	GON7_HUMAN	6	82.8776	1.82878	cancer
cancer / NAT	Q5VZM2-2	Q5VZM2-2	Q5VZM2	-0.682997	0.682997	1.21109e-11	60	Q5VZM2-2	RRAGB	Isoform 2 of Ras-related GTP-binding protein B	RRAGB_HUMAN	18	-37.713	0.62287	cancer
cancer / NAT	Q9NT62	Q9NT62	Q9NT62	1.22572	1.22572	1.21647e-11	132	Q9NT62	ATG3	Ubiquitin-like-conjugating enzyme ATG3	ATG3_HUMAN	23	133.872	2.33872	cancer
cancer / NAT	P52735-3	P52735-3	P52735	0.947047	0.947047	1.22341e-11	168	P52735-3	VAV2	Isoform 3 of Guanine nucleotide exchange factor VAV2	VAV2_HUMAN	48	92.7923	1.92792	cancer
cancer / NAT	O75152	O75152	O75152	1.34091	1.34091	1.25625e-11	150	O75152	ZC3H11A	Zinc finger CCCH domain-containing protein 11A	ZC11A_HUMAN	51	153.312	2.53312	cancer
cancer / NAT	Q8NBF2	Q8NBF2	Q8NBF2	-0.802862	0.802862	1.25625e-11	123	Q8NBF2	NHLRC2	NHL repeat-containing protein 2	NHLC2_HUMAN	36	-42.6789	0.573211	cancer
cancer / NAT	Q9UBV2	Q9UBV2	Q9UBV2	-0.309912	0.309912	1.2727e-11	105	Q9UBV2	SEL1L	Protein sel-1 homolog 1	SE1L1_HUMAN	33	-19.3309	0.806691	cancer
cancer / NAT	O75400-3	O75400-3	O75400	0.884495	0.884495	1.29607e-11	210	O75400-3	PRPF40A	Isoform 3 of Pre-mRNA-processing factor 40 homolog A	PR40A_HUMAN	52	84.6118	1.84612	cancer
cancer / NAT	Q86X51	Q86X51	Q86X51	1.97477	1.97477	1.32513e-11	72	Q86X51	CXorf67	Uncharacterized protein CXorf67	CX067_HUMAN	26	293.066	3.93066	cancer
cancer / NAT	P05556	P05556	P05556	-0.781865	0.781865	1.33778e-11	204	P05556	ITGB1	Integrin beta-1	ITB1_HUMAN	36	-41.8386	0.581614	cancer
cancer / NAT	Q14571	Q14571	Q14571	-1.50387	1.50387	1.33778e-11	246	Q14571	ITPR2	Inositol 1,4,5-trisphosphate receptor type 2	ITPR2_HUMAN	94	-64.7395	0.352605	cancer
cancer / NAT	Q7Z2T5	Q7Z2T5	Q7Z2T5	0.773183	0.773183	1.38098e-11	189	Q7Z2T5	TRMT1L	TRMT1-like protein	TRM1L_HUMAN	55	70.9036	1.70904	cancer
cancer / NAT	Q15020	Q15020	Q15020	0.827478	0.827478	1.44073e-11	339	Q15020	SART3	Squamous cell carcinoma antigen recognized by T-cells 3	SART3_HUMAN	74	77.458	1.77458	cancer
cancer / NAT	O75607	O75607	O75607	2.03015	2.03015	1.4987e-11	33	O75607	NPM3	Nucleoplasmin-3	NPM3_HUMAN	6	308.448	4.08448	cancer
cancer / NAT	Q96Q15	Q96Q15	Q96Q15	-0.197497	0.197497	1.53476e-11	288	Q96Q15	SMG1	Serine/threonine-protein kinase SMG1	SMG1_HUMAN	117	-12.7938	0.872062	cancer
cancer / NAT	Q6IA69	Q6IA69	Q6IA69	-0.866199	0.866199	1.53574e-11	51	Q6IA69	NADSYN1	Glutamine-dependent NAD(+) synthetase	NADE_HUMAN	19	-45.141	0.54859	cancer
cancer / NAT	Q9H9Y6;Q9H9Y6-3	Q9H9Y6;Q9H9Y6-3	Q9H9Y6	0.633586	0.633586	1.54786e-11	165	Q9H9Y6;Q9H9Y6-3	POLR1B	DNA-directed RNA polymerase I subunit RPA2;Isoform 3 of DNA-directed RNA polymerase I subunit RPA2	RPA2_HUMAN	50	55.1417	1.55142	cancer
cancer / NAT	P27797	P27797	P27797	-0.688505	0.688505	1.56384e-11	255	P27797	CALR	Calreticulin	CALR_HUMAN	39	-37.9503	0.620497	cancer
cancer / NAT	P39656	P39656	P39656	-0.240485	0.240485	1.56384e-11	120	P39656	DDOST	Dolichyl-diphosphooligosaccharide--protein glycosyltransferase 48 kDa subunit	OST48_HUMAN	21	-15.354	0.84646	cancer
cancer / NAT	P52565	P52565	P52565	-0.479183	0.479183	1.59932e-11	93	P52565	ARHGDIA	Rho GDP-dissociation inhibitor 1	GDIR1_HUMAN	16	-28.2616	0.717384	cancer
cancer / NAT	P10412	P10412	P10412	-2.10406	2.10406	1.69416e-11	105	P10412	HIST1H1E	Histone H1.4	H14_HUMAN	26	-76.7397	0.232603	cancer
cancer / NAT	Q8NAV1	Q8NAV1	Q8NAV1	0.939326	0.939326	1.71918e-11	72	Q8NAV1	PRPF38A	Pre-mRNA-splicing factor 38A	PR38A_HUMAN	16	91.7632	1.91763	cancer
cancer / NAT	O00571	O00571	O00571	0.900643	0.900643	1.73541e-11	75	O00571	DDX3X	ATP-dependent RNA helicase DDX3X	DDX3X_HUMAN	14	86.6897	1.8669	cancer
cancer / NAT	O60566;O60566-3	O60566;O60566-3	O60566	0.906763	0.906763	1.73541e-11	156	O60566;O60566-3	BUB1B	Mitotic checkpoint serine/threonine-protein kinase BUB1 beta;Isoform 3 of Mitotic checkpoint serine/threonine-protein kinase BUB1 beta	BUB1B_HUMAN	62	87.4834	1.87483	cancer
cancer / NAT	O15530-2	O15530-2	O15530	-0.937875	0.937875	1.7379e-11	66	O15530-2	PDPK1	Isoform 2 of 3-phosphoinositide-dependent protein kinase 1	PDPK1_HUMAN	19	-47.7999	0.522001	cancer
cancer / NAT	Q5QJE6	Q5QJE6	Q5QJE6	1.2727	1.2727	1.74413e-11	111	Q5QJE6	DNTTIP2	Deoxynucleotidyltransferase terminal-interacting protein 2	TDIF2_HUMAN	30	141.614	2.41614	cancer
cancer / NAT	Q9NPF4	Q9NPF4	Q9NPF4	0.974394	0.974394	1.78948e-11	90	Q9NPF4	OSGEP	Probable tRNA N6-adenosine threonylcarbamoyltransferase	OSGEP_HUMAN	20	96.4816	1.96482	cancer
cancer / NAT	P0C7V8	P0C7V8	P0C7V8	-4.50983	4.50983	1.8211e-11	66	P0C7V8	DCAF8L2	DDB1- and CUL4-associated factor 8-like protein 2	DC8L2_HUMAN	20	-95.6106	0.043894	cancer
cancer / NAT	Q96MU7	Q96MU7	Q96MU7	0.711674	0.711674	1.82317e-11	102	Q96MU7	YTHDC1	YTH domain-containing protein 1	YTDC1_HUMAN	35	63.7703	1.6377	cancer
cancer / NAT	Q9GZR7	Q9GZR7	Q9GZR7	0.602577	0.602577	1.82873e-11	201	Q9GZR7	DDX24	ATP-dependent RNA helicase DDX24	DDX24_HUMAN	46	51.8427	1.51843	cancer
cancer / NAT	P51151	P51151	P51151	-1.06898	1.06898	1.84622e-11	48	P51151	RAB9A	Ras-related protein Rab-9A	RAB9A_HUMAN	13	-52.3343	0.476657	cancer
cancer / NAT	P61224	P61224	P61224	-0.607426	0.607426	1.84754e-11	99	P61224	RAP1B	Ras-related protein Rap-1b	RAP1B_HUMAN	19	-34.3633	0.656367	cancer
cancer / NAT	Q15637-6	Q15637-6	Q15637	0.640196	0.640196	1.87248e-11	135	Q15637-6	SF1	Isoform 6 of Splicing factor 1	SF01_HUMAN	26	55.8541	1.55854	cancer
cancer / NAT	P0DOX3	P0DOX3	P0DOX3	-1.13555	1.13555	1.90499e-11	33	P0DOX3	NaN	Immunoglobulin delta heavy chain	IGD_HUMAN	15	-54.4837	0.455163	cancer
cancer / NAT	Q9UHX1-2	Q9UHX1-2	Q9UHX1	0.965548	0.965548	1.90904e-11	156	Q9UHX1-2	PUF60	Isoform 2 of Poly(U)-binding-splicing factor PUF60	PUF60_HUMAN	34	95.2805	1.9528	cancer
cancer / NAT	Q96F44;Q96F44-3	Q96F44;Q96F44-3	Q96F44	1.28933	1.28933	1.92134e-11	33	Q96F44;Q96F44-3	TRIM11	E3 ubiquitin-protein ligase TRIM11;Isoform 3 of E3 ubiquitin-protein ligase TRIM11	TRI11_HUMAN	18	144.415	2.44415	cancer
cancer / NAT	P00742	P00742	P00742	-1.96049	1.96049	1.96311e-11	45	P00742	F10	Coagulation factor X	FA10_HUMAN	16	-74.3059	0.256941	cancer
cancer / NAT	P68371	P68371	P68371	-0.0734547	0.0734547	1.98288e-11	288	P68371	TUBB4B	Tubulin beta-4B chain	TBB4B_HUMAN	33	-4.96405	0.95036	cancer
cancer / NAT	Q9BTC8;Q9BTC8-2	Q9BTC8;Q9BTC8-2	Q9BTC8	1.53409	1.53409	2.07913e-11	63	Q9BTC8;Q9BTC8-2	MTA3	Metastasis-associated protein MTA3;Isoform 2 of Metastasis-associated protein MTA3	MTA3_HUMAN	15	189.605	2.89605	cancer
cancer / NAT	Q9UG63;Q9UG63-2	Q9UG63;Q9UG63-2	Q9UG63	1.04233	1.04233	2.09778e-11	168	Q9UG63;Q9UG63-2	ABCF2	ATP-binding cassette sub-family F member 2;Isoform 2 of ATP-binding cassette sub-family F member 2	ABCF2_HUMAN	42	105.955	2.05955	cancer
cancer / NAT	Q8N3V7-2	Q8N3V7-2	Q8N3V7	-1.17201	1.17201	2.09821e-11	126	Q8N3V7-2	SYNPO	Isoform 2 of Synaptopodin	SYNPO_HUMAN	48	-55.6197	0.443803	cancer
cancer / NAT	O00329	O00329	O00329	1.17829	1.17829	2.15633e-11	138	O00329	PIK3CD	Phosphatidylinositol 4,5-bisphosphate 3-kinase catalytic subunit delta isoform	PK3CD_HUMAN	52	126.308	2.26308	cancer
cancer / NAT	P32189;P32189-1;P32189-2;P32189-4	P32189;P32189-1;P32189-2;P32189-4	P32189	1.99011	1.99011	2.19954e-11	96	P32189;P32189-1;P32189-2;P32189-4	GK	Glycerol kinase;Isoform 1 of Glycerol kinase;Isoform 2 of Glycerol kinase;Isoform 4 of Glycerol kinase	GLPK_HUMAN	23	297.268	3.97268	cancer
cancer / NAT	Q14005;Q14005-2;Q14005-3	Q14005;Q14005-2;Q14005-3	Q14005	1.23277	1.23277	2.26017e-11	114	Q14005;Q14005-2;Q14005-3	IL16	Pro-interleukin-16;Isoform 2 of Pro-interleukin-16;Isoform 3 of Pro-interleukin-16	IL16_HUMAN	29	135.018	2.35018	cancer
cancer / NAT	Q14157-1;Q14157-4	Q14157-1;Q14157-4	Q14157	0.453807	0.453807	2.29734e-11	147	Q14157-1;Q14157-4	UBAP2L	Isoform 2 of Ubiquitin-associated protein 2-like;Isoform 4 of Ubiquitin-associated protein 2-like	UBP2L_HUMAN	33	36.965	1.36965	cancer
cancer / NAT	P27169	P27169	P27169	-1.56683	1.56683	2.35164e-11	57	P27169	PON1	Serum paraoxonase/arylesterase 1	PON1_HUMAN	10	-66.2452	0.337548	cancer
cancer / NAT	O76074	O76074	O76074	-2.3065	2.3065	2.39872e-11	75	O76074	PDE5A	cGMP-specific 3',5'-cyclic phosphodiesterase	PDE5A_HUMAN	41	-79.7849	0.202151	cancer
cancer / NAT	P54278	P54278	P54278	1.55584	1.55584	2.4141e-11	81	P54278	PMS2	Mismatch repair endonuclease PMS2	PMS2_HUMAN	40	194.005	2.94005	cancer
cancer / NAT	Q06520	Q06520	Q06520	-3.26096	3.26096	2.4543e-11	66	Q06520	SULT2A1	Bile salt sulfotransferase	ST2A1_HUMAN	20	-89.5684	0.104316	cancer
cancer / NAT	O15344	O15344	O15344	-3.17963	3.17963	2.47917e-11	54	O15344	MID1	E3 ubiquitin-protein ligase Midline-1	TRI18_HUMAN	31	-88.9634	0.110366	cancer
cancer / NAT	Q969F0	Q969F0	Q969F0	-4.00173	4.00173	2.53734e-11	48	Q969F0	FATE1	Fetal and adult testis-expressed transcript protein	FATE1_HUMAN	12	-93.7575	0.0624251	cancer
cancer / NAT	O15061	O15061	O15061	-1.52078	1.52078	2.59444e-11	132	O15061	SYNM	Synemin	SYNEM_HUMAN	72	-65.1501	0.348499	cancer
cancer / NAT	Q9H902	Q9H902	Q9H902	-3.76696	3.76696	2.67595e-11	48	Q9H902	REEP1	Receptor expression-enhancing protein 1	REEP1_HUMAN	12	-92.6543	0.0734569	cancer
cancer / NAT	P63092-3	P63092-3	P63092	-1.23344	1.23344	2.69675e-11	102	P63092-3	GNAS	Isoform 3 of Guanine nucleotide-binding protein G(s) subunit alpha isoforms short	GNAS2_HUMAN	24	-57.4698	0.425302	cancer
cancer / NAT	Q6P087	Q6P087	Q6P087	2.21051	2.21051	2.70359e-11	57	Q6P087	RPUSD3	Mitochondrial mRNA pseudouridine synthase RPUSD3	RUSD3_HUMAN	21	362.839	4.62839	cancer
cancer / NAT	P55160	P55160	P55160	1.32081	1.32081	2.75809e-11	126	P55160	NCKAP1L	Nck-associated protein 1-like	NCKPL_HUMAN	39	149.807	2.49807	cancer
cancer / NAT	Q8TB22;Q8TB22-2	Q8TB22;Q8TB22-2	Q8TB22	-2.01655	2.01655	2.76379e-11	78	Q8TB22;Q8TB22-2	SPATA20	Spermatogenesis-associated protein 20;Isoform 2 of Spermatogenesis-associated protein 20	SPT20_HUMAN	29	-75.2852	0.247148	cancer
cancer / NAT	O95433	O95433	O95433	1.28535	1.28535	2.80672e-11	159	O95433	AHSA1	Activator of 90 kDa heat shock protein ATPase homolog 1	AHSA1_HUMAN	33	143.742	2.43742	cancer
cancer / NAT	O75475	O75475	O75475	0.869348	0.869348	2.84302e-11	189	O75475	PSIP1	PC4 and SFRS1-interacting protein	PSIP1_HUMAN	40	82.6837	1.82684	cancer
cancer / NAT	Q15643	Q15643	Q15643	0.524812	0.524812	2.90116e-11	357	Q15643	TRIP11	Thyroid receptor-interacting protein 11	TRIPB_HUMAN	138	43.8747	1.43875	cancer
cancer / NAT	Q9P1Y6;Q9P1Y6-3	Q9P1Y6;Q9P1Y6-3	Q9P1Y6	1.00302	1.00302	2.90437e-11	87	Q9P1Y6;Q9P1Y6-3	PHRF1	PHD and RING finger domain-containing protein 1;Isoform 3 of PHD and RING finger domain-containing protein 1	PHRF1_HUMAN	44	100.419	2.00419	cancer
cancer / NAT	P19022	P19022	P19022	-2.08662	2.08662	2.91079e-11	90	P19022	CDH2	Cadherin-2	CADH2_HUMAN	32	-76.4568	0.235432	cancer
cancer / NAT	Q02040	Q02040	Q02040	0.826822	0.826822	2.95144e-11	117	Q02040	AKAP17A	A-kinase anchor protein 17A	AK17A_HUMAN	30	77.3774	1.77377	cancer
cancer / NAT	Q9Y2W6	Q9Y2W6	Q9Y2W6	1.33005	1.33005	2.95175e-11	123	Q9Y2W6	TDRKH	Tudor and KH domain-containing protein	TDRKH_HUMAN	30	151.411	2.51411	cancer
cancer / NAT	Q9NZ43	Q9NZ43	Q9NZ43	-1.38597	1.38597	2.97159e-11	51	Q9NZ43	USE1	Vesicle transport protein USE1	USE1_HUMAN	17	-61.7369	0.382631	cancer
cancer / NAT	P0DOX2	P0DOX2	P0DOX2	-1.5529	1.5529	2.9737e-11	87	P0DOX2	NaN	Immunoglobulin alpha-2 heavy chain	IGA2_HUMAN	18	-65.9177	0.340823	cancer
cancer / NAT	P25325-2	P25325-2	P25325	-0.645866	0.645866	2.97905e-11	78	P25325-2	MPST	Isoform 2 of 3-mercaptopyruvate sulfurtransferase	THTM_HUMAN	16	-36.0891	0.639109	cancer
cancer / NAT	Q6IQ22	Q6IQ22	Q6IQ22	-1.38294	1.38294	2.97905e-11	45	Q6IQ22	RAB12	Ras-related protein Rab-12	RAB12_HUMAN	20	-61.6562	0.383438	cancer
cancer / NAT	Q86XR7-2	Q86XR7-2	Q86XR7	-0.749621	0.749621	3.01185e-11	45	Q86XR7-2	TICAM2	Isoform 2 of TIR domain-containing adapter molecule 2	TCAM2_HUMAN	15	-40.524	0.59476	cancer
cancer / NAT	Q96HA7	Q96HA7	Q96HA7	2.28992	2.28992	3.01585e-11	111	Q96HA7	TONSL	Tonsoku-like protein	TONSL_HUMAN	46	389.028	4.89028	cancer
cancer / NAT	Q86YV0	Q86YV0	Q86YV0	1.33445	1.33445	3.03489e-11	90	Q86YV0	RASAL3	RAS protein activator like-3	RASL3_HUMAN	38	152.18	2.5218	cancer
cancer / NAT	Q9H0B6	Q9H0B6	Q9H0B6	-1.25428	1.25428	3.10383e-11	93	Q9H0B6	KLC2	Kinesin light chain 2	KLC2_HUMAN	35	-58.0796	0.419204	cancer
cancer / NAT	Q9HCG8	Q9HCG8	Q9HCG8	1.11648	1.11648	3.1475e-11	129	Q9HCG8	CWC22	Pre-mRNA-splicing factor CWC22 homolog	CWC22_HUMAN	37	116.817	2.16817	cancer
cancer / NAT	P09455	P09455	P09455	-3.51544	3.51544	3.19079e-11	57	P09455	RBP1	Retinol-binding protein 1	RET1_HUMAN	7	-91.2553	0.0874473	cancer
cancer / NAT	O95466-2	O95466-2	O95466	0.811718	0.811718	3.19079e-11	120	O95466-2	FMNL1	Isoform 2 of Formin-like protein 1	FMNL1_HUMAN	45	75.5301	1.7553	cancer
cancer / NAT	Q9H4F8;Q9H4F8-2	Q9H4F8;Q9H4F8-2	Q9H4F8	-3.82937	3.82937	3.26051e-11	69	Q9H4F8;Q9H4F8-2	SMOC1	SPARC-related modular calcium-binding protein 1;Isoform 2 of SPARC-related modular calcium-binding protein 1	SMOC1_HUMAN	20	-92.9653	0.0703469	cancer
cancer / NAT	Q96SI9;Q96SI9-2	Q96SI9;Q96SI9-2	Q96SI9	0.909707	0.909707	3.28167e-11	117	Q96SI9;Q96SI9-2	STRBP	Spermatid perinuclear RNA-binding protein;Isoform 2 of Spermatid perinuclear RNA-binding protein	STRBP_HUMAN	35	87.8663	1.87866	cancer
cancer / NAT	Q9NYU2;Q9NYU2-2	Q9NYU2;Q9NYU2-2	Q9NYU2	-0.100567	0.100567	3.28624e-11	399	Q9NYU2;Q9NYU2-2	UGGT1	UDP-glucose:glycoprotein glucosyltransferase 1;Isoform 2 of UDP-glucose:glycoprotein glucosyltransferase 1	UGGG1_HUMAN	83	-6.73335	0.932667	cancer
cancer / NAT	Q99598	Q99598	Q99598	0.606598	0.606598	3.32482e-11	153	Q99598	TSNAX	Translin-associated protein X	TSNAX_HUMAN	25	52.2665	1.52266	cancer
cancer / NAT	P56282	P56282	P56282	2.22861	2.22861	3.3395e-11	63	P56282	POLE2	DNA polymerase epsilon subunit 2	DPOE2_HUMAN	20	368.681	4.68681	cancer
cancer / NAT	Q9NVH0	Q9NVH0	Q9NVH0	1.29985	1.29985	3.352e-11	138	Q9NVH0	EXD2	Exonuclease 3'-5' domain-containing protein 2	EXD2_HUMAN	34	146.203	2.46203	cancer
cancer / NAT	Q92543;Q92543-2	Q92543;Q92543-2	Q92543	-2.65247	2.65247	3.3601e-11	15	Q92543;Q92543-2	SNX19	Sorting nexin-19;Isoform 2 of Sorting nexin-19	SNX19_HUMAN	9	-84.0953	0.159047	cancer
cancer / NAT	Q9NZC7;Q9NZC7-2	Q9NZC7;Q9NZC7-2	Q9NZC7	-1.24157	1.24157	3.41374e-11	21	Q9NZC7;Q9NZC7-2	WWOX	WW domain-containing oxidoreductase;Isoform 2 of WW domain-containing oxidoreductase	WWOX_HUMAN	9	-57.7088	0.422912	cancer
cancer / NAT	Q0VD83;Q0VD83-4	Q0VD83;Q0VD83-4	Q0VD83	1.89224	1.89224	3.42677e-11	69	Q0VD83;Q0VD83-4	APOBR	Apolipoprotein B receptor;Isoform 4 of Apolipoprotein B receptor	APOBR_HUMAN	34	271.212	3.71212	cancer
cancer / NAT	Q9H553	Q9H553	Q9H553	-1.40797	1.40797	3.46902e-11	93	Q9H553	ALG2	Alpha-1,3/1,6-mannosyltransferase ALG2	ALG2_HUMAN	24	-62.3159	0.376841	cancer
cancer / NAT	Q96DX5	Q96DX5	Q96DX5	-3.97296	3.97296	3.52775e-11	42	Q96DX5	ASB9	Ankyrin repeat and SOCS box protein 9	ASB9_HUMAN	10	-93.6318	0.0636823	cancer
cancer / NAT	P53680	P53680	P53680	-1.1103	1.1103	3.52857e-11	27	P53680	AP2S1	AP-2 complex subunit sigma	AP2S1_HUMAN	7	-53.6803	0.463197	cancer
cancer / NAT	Q6IN85	Q6IN85	Q6IN85	0.902844	0.902844	3.53031e-11	174	Q6IN85	PPP4R3A	Serine/threonine-protein phosphatase 4 regulatory subunit 3A	P4R3A_HUMAN	48	86.9749	1.86975	cancer
cancer / NAT	P35249	P35249	P35249	1.47285	1.47285	3.56818e-11	93	P35249	RFC4	Replication factor C subunit 4	RFC4_HUMAN	25	177.57	2.7757	cancer
cancer / NAT	P08865	P08865	P08865	0.81768	0.81768	3.57466e-11	153	P08865	RPSA	40S ribosomal protein SA	RSSA_HUMAN	21	76.257	1.76257	cancer
cancer / NAT	Q8WUA4	Q8WUA4	Q8WUA4	1.27594	1.27594	3.57541e-11	135	Q8WUA4	GTF3C2	General transcription factor 3C polypeptide 2	TF3C2_HUMAN	33	142.157	2.42157	cancer
cancer / NAT	Q9H6V9;Q9H6V9-2	Q9H6V9;Q9H6V9-2	Q9H6V9	-1.87449	1.87449	3.58439e-11	33	Q9H6V9;Q9H6V9-2	LDAH	Lipid droplet-associated hydrolase;Isoform 2 of Lipid droplet-associated hydrolase	LDAH_HUMAN	13	-72.7277	0.272723	cancer
cancer / NAT	P50748	P50748	P50748	1.21681	1.21681	3.58439e-11	123	P50748	KNTC1	Kinetochore-associated protein 1	KNTC1_HUMAN	68	132.431	2.32431	cancer
cancer / NAT	Q5H9L2	Q5H9L2	Q5H9L2	-4.13147	4.13147	3.59076e-11	39	Q5H9L2	TCEAL5	Transcription elongation factor A protein-like 5	TCAL5_HUMAN	9	-94.2944	0.0570561	cancer
cancer / NAT	O43516;O43516-3	O43516;O43516-3	O43516	0.867932	0.867932	3.63355e-11	60	O43516;O43516-3	WIPF1	WAS/WASL-interacting protein family member 1;Isoform 3 of WAS/WASL-interacting protein family member 1	WIPF1_HUMAN	18	82.5045	1.82504	cancer
cancer / NAT	Q5T8D3-2;Q5T8D3-3	Q5T8D3-2;Q5T8D3-3	Q5T8D3	-1.96397	1.96397	3.63355e-11	78	Q5T8D3-2;Q5T8D3-3	ACBD5	Isoform 2 of Acyl-CoA-binding domain-containing protein 5;Isoform 3 of Acyl-CoA-binding domain-containing protein 5	ACBD5_HUMAN	23	-74.3678	0.256322	cancer
cancer / NAT	O75521;O75521-2	O75521;O75521-2	O75521	-0.585792	0.585792	3.65129e-11	96	O75521;O75521-2	ECI2	Enoyl-CoA delta isomerase 2, mitochondrial;Isoform 2 of Enoyl-CoA delta isomerase 2, mitochondrial	ECI2_HUMAN	22	-33.3717	0.666283	cancer
cancer / NAT	Q6NUQ4	Q6NUQ4	Q6NUQ4	1.02509	1.02509	3.78248e-11	105	Q6NUQ4	TMEM214	Transmembrane protein 214	TM214_HUMAN	32	103.509	2.03509	cancer
cancer / NAT	Q9BUK6-2	Q9BUK6-2	Q9BUK6	1.49133	1.49133	3.81301e-11	90	Q9BUK6-2	MSTO1	Isoform 2 of Protein misato homolog 1	MSTO1_HUMAN	27	181.149	2.81149	cancer
cancer / NAT	P31939	P31939	P31939	0.894278	0.894278	3.83784e-11	312	P31939	ATIC	Bifunctional purine biosynthesis protein PURH	PUR9_HUMAN	54	85.8679	1.85868	cancer
cancer / NAT	O76076	O76076	O76076	-3.74538	3.74538	3.8383e-11	51	O76076	WISP2	WNT1-inducible-signaling pathway protein 2	WISP2_HUMAN	10	-92.5436	0.0745637	cancer
cancer / NAT	Q92769	Q92769	Q92769	0.588934	0.588934	3.87467e-11	219	Q92769	HDAC2	Histone deacetylase 2	HDAC2_HUMAN	32	50.4135	1.50413	cancer
cancer / NAT	P51452	P51452	P51452	-0.553668	0.553668	3.90633e-11	54	P51452	DUSP3	Dual specificity protein phosphatase 3	DUS3_HUMAN	9	-31.8714	0.681286	cancer
cancer / NAT	Q99707	Q99707	Q99707	-0.857375	0.857375	3.9982e-11	171	Q99707	MTR	Methionine synthase	METH_HUMAN	68	-44.8044	0.551956	cancer
cancer / NAT	Q16719	Q16719	Q16719	1.67487	1.67487	4.00131e-11	84	Q16719	KYNU	Kynureninase	KYNU_HUMAN	23	219.29	3.1929	cancer
cancer / NAT	Q00169	Q00169	Q00169	-0.413288	0.413288	4.05019e-11	123	Q00169	PITPNA	Phosphatidylinositol transfer protein alpha isoform	PIPNA_HUMAN	20	-24.909	0.75091	cancer
cancer / NAT	Q9H074-2	Q9H074-2	Q9H074	-0.379882	0.379882	4.0584e-11	57	Q9H074-2	PAIP1	Isoform 2 of Polyadenylate-binding protein-interacting protein 1	PAIP1_HUMAN	14	-23.1499	0.768501	cancer
cancer / NAT	Q9NRN5	Q9NRN5	Q9NRN5	-1.80621	1.80621	4.13333e-11	111	Q9NRN5	OLFML3	Olfactomedin-like protein 3	OLFL3_HUMAN	25	-71.4059	0.285941	cancer
cancer / NAT	Q9UNH6;Q9UNH6-3	Q9UNH6;Q9UNH6-3	Q9UNH6	-1.93617	1.93617	4.23882e-11	54	Q9UNH6;Q9UNH6-3	SNX7	Sorting nexin-7;Isoform 3 of Sorting nexin-7	SNX7_HUMAN	23	-73.869	0.26131	cancer
cancer / NAT	Q8WTT2	Q8WTT2	Q8WTT2	0.758542	0.758542	4.25063e-11	108	Q8WTT2	NOC3L	Nucleolar complex protein 3 homolog	NOC3L_HUMAN	40	69.178	1.69178	cancer
cancer / NAT	Q7RTV0	Q7RTV0	Q7RTV0	1.07944	1.07944	4.29582e-11	36	Q7RTV0	PHF5A	PHD finger-like domain-containing protein 5A	PHF5A_HUMAN	8	111.322	2.11322	cancer
cancer / NAT	Q12923-3	Q12923-3	Q12923	-1.68383	1.68383	4.31713e-11	75	Q12923-3	PTPN13	Isoform 3 of Tyrosine-protein phosphatase non-receptor type 13	PTN13_HUMAN	75	-68.8744	0.311256	cancer
cancer / NAT	P08727	P08727	P08727	-0.819572	0.819572	4.32911e-11	99	P08727	KRT19	Keratin, type I cytoskeletal 19	K1C19_HUMAN	26	-43.339	0.56661	cancer
cancer / NAT	Q8IXL7-2	Q8IXL7-2	Q8IXL7	-1.41902	1.41902	4.4047e-11	24	Q8IXL7-2	MSRB3	Isoform 2 of Methionine-R-sulfoxide reductase B3	MSRB3_HUMAN	5	-62.6034	0.373966	cancer
cancer / NAT	Q9Y5Q9	Q9Y5Q9	Q9Y5Q9	1.05682	1.05682	4.45078e-11	102	Q9Y5Q9	GTF3C3	General transcription factor 3C polypeptide 3	TF3C3_HUMAN	38	108.035	2.08035	cancer
cancer / NAT	P49366	P49366	P49366	1.29658	1.29658	4.52058e-11	48	P49366	DHPS	Deoxyhypusine synthase	DHYS_HUMAN	19	145.646	2.45646	cancer
cancer / NAT	Q99719	Q99719	Q99719	-1.56344	1.56344	4.58506e-11	39	Q99719	2005-09-01	Septin-5	SEPT5_HUMAN	12	-66.1656	0.338344	cancer
cancer / NAT	Q99547	Q99547	Q99547	1.30501	1.30501	4.58506e-11	42	Q99547	MPHOSPH6	M-phase phosphoprotein 6	MPH6_HUMAN	15	147.085	2.47085	cancer
cancer / NAT	Q8IY67-2	Q8IY67-2	Q8IY67	0.96746	0.96746	4.58509e-11	141	Q8IY67-2	RAVER1	Isoform 2 of Ribonucleoprotein PTB-binding 1	RAVR1_HUMAN	38	95.5395	1.95539	cancer
cancer / NAT	Q9UII4	Q9UII4	Q9UII4	0.747745	0.747745	4.65417e-11	231	Q9UII4	HERC5	E3 ISG15--protein ligase HERC5	HERC5_HUMAN	57	67.9167	1.67917	cancer
cancer / NAT	Q9NWH9	Q9NWH9	Q9NWH9	0.955001	0.955001	4.66241e-11	213	Q9NWH9	SLTM	SAFB-like transcription modulator	SLTM_HUMAN	59	93.8581	1.93858	cancer
cancer / NAT	Q9BVS4	Q9BVS4	Q9BVS4	1.00053	1.00053	4.66587e-11	33	Q9BVS4	RIOK2	Serine/threonine-protein kinase RIO2	RIOK2_HUMAN	18	100.073	2.00073	cancer
cancer / NAT	P11021	P11021	P11021	-0.217171	0.217171	4.67914e-11	423	P11021	HSPA5	Endoplasmic reticulum chaperone BiP	BIP_HUMAN	60	-13.9749	0.860251	cancer
cancer / NAT	O15264	O15264	O15264	-1.18584	1.18584	4.80393e-11	66	O15264	MAPK13	Mitogen-activated protein kinase 13	MK13_HUMAN	18	-56.0433	0.439567	cancer
cancer / NAT	Q16401	Q16401	Q16401	-0.434307	0.434307	4.84325e-11	132	Q16401	PSMD5	26S proteasome non-ATPase regulatory subunit 5	PSMD5_HUMAN	27	-25.9951	0.740049	cancer
cancer / NAT	A6NGB9	A6NGB9	A6NGB9	-1.99296	1.99296	4.99132e-11	93	A6NGB9	WIPF3	WAS/WASL-interacting protein family member 3	WIPF3_HUMAN	22	-74.8776	0.251224	cancer
cancer / NAT	Q9BV40	Q9BV40	Q9BV40	1.76305	1.76305	5.0792e-11	33	Q9BV40	VAMP8	Vesicle-associated membrane protein 8	VAMP8_HUMAN	6	239.414	3.39414	cancer
cancer / NAT	O60879-2	O60879-2	O60879	-1.12532	1.12532	5.09487e-11	282	O60879-2	DIAPH2	Isoform 2 of Protein diaphanous homolog 2	DIAP2_HUMAN	71	-54.16	0.4584	cancer
cancer / NAT	P51659	P51659	P51659	-0.670646	0.670646	5.17933e-11	282	P51659	HSD17B4	Peroxisomal multifunctional enzyme type 2	DHB4_HUMAN	58	-37.1775	0.628225	cancer
cancer / NAT	Q8IVI9;Q8IVI9-4	Q8IVI9;Q8IVI9-4	Q8IVI9	-1.41027	1.41027	5.22249e-11	60	Q8IVI9;Q8IVI9-4	NOSTRIN	Nostrin;Isoform 4 of Nostrin	NOSTN_HUMAN	16	-62.3759	0.376241	cancer
cancer / NAT	Q03013	Q03013	Q03013	-2.93237	2.93237	5.26507e-11	30	Q03013	GSTM4	Glutathione S-transferase Mu 4	GSTM4_HUMAN	9	-86.9	0.131	cancer
cancer / NAT	Q13361;Q13361-2	Q13361;Q13361-2	Q13361	-2.87512	2.87512	5.26903e-11	45	Q13361;Q13361-2	MFAP5	Microfibrillar-associated protein 5;Isoform 2 of Microfibrillar-associated protein 5	MFAP5_HUMAN	6	-86.3698	0.136302	cancer
cancer / NAT	P23368	P23368	P23368	-1.28591	1.28591	5.26903e-11	165	P23368	ME2	NAD-dependent malic enzyme, mitochondrial	MAOM_HUMAN	40	-58.9888	0.410112	cancer
cancer / NAT	P35240	P35240	P35240	0.751294	0.751294	5.32594e-11	93	P35240	NF2	Merlin	MERL_HUMAN	39	68.3302	1.6833	cancer
cancer / NAT	Q96IY4	Q96IY4	Q96IY4	-1.2335	1.2335	5.34674e-11	72	Q96IY4	CPB2	Carboxypeptidase B2	CBPB2_HUMAN	16	-57.4716	0.425284	cancer
cancer / NAT	Q96SB8	Q96SB8	Q96SB8	0.505683	0.505683	5.42248e-11	162	Q96SB8	SMC6	Structural maintenance of chromosomes protein 6	SMC6_HUMAN	56	41.9795	1.41979	cancer
cancer / NAT	Q8WXF1	Q8WXF1	Q8WXF1	0.954789	0.954789	5.43872e-11	162	Q8WXF1	PSPC1	Paraspeckle component 1	PSPC1_HUMAN	33	93.8296	1.9383	cancer
cancer / NAT	P62701	P62701	P62701	0.658162	0.658162	5.85925e-11	192	P62701	RPS4X	40S ribosomal protein S4, X isoform	RS4X_HUMAN	33	57.8071	1.57807	cancer
cancer / NAT	Q9NX46	Q9NX46	Q9NX46	-0.519311	0.519311	5.93878e-11	87	Q9NX46	ADPRHL2	Poly(ADP-ribose) glycohydrolase ARH3	ARHL2_HUMAN	19	-30.2295	0.697705	cancer
cancer / NAT	P84157-2	P84157-2	P84157	-3.01107	3.01107	6.01188e-11	57	P84157-2	MXRA7	Isoform 2 of Matrix-remodeling-associated protein 7	MXRA7_HUMAN	11	-87.5956	0.124044	cancer
cancer / NAT	Q6PL24	Q6PL24	Q6PL24	-0.518078	0.518078	6.05681e-11	36	Q6PL24	TMED8	Protein TMED8	TMED8_HUMAN	15	-30.1698	0.698302	cancer
cancer / NAT	P15289;P15289-2	P15289;P15289-2	P15289	-1.38643	1.38643	6.18692e-11	42	P15289;P15289-2	ARSA	Arylsulfatase A;Isoform 2 of Arylsulfatase A	ARSA_HUMAN	13	-61.7489	0.382511	cancer
cancer / NAT	P08567	P08567	P08567	2.02317	2.02317	6.28638e-11	69	P08567	PLEK	Pleckstrin	PLEK_HUMAN	18	306.475	4.06475	cancer
cancer / NAT	Q92918-2	Q92918-2	Q92918	2.20961	2.20961	6.3491e-11	87	Q92918-2	MAP4K1	Isoform 2 of Mitogen-activated protein kinase kinase kinase kinase 1	M4K1_HUMAN	37	362.549	4.62549	cancer
cancer / NAT	P57087	P57087	P57087	-3.98112	3.98112	6.35423e-11	27	P57087	JAM2	Junctional adhesion molecule B	JAM2_HUMAN	9	-93.6677	0.0633234	cancer
cancer / NAT	P29144	P29144	P29144	0.419599	0.419599	6.35435e-11	303	P29144	TPP2	Tripeptidyl-peptidase 2	TPP2_HUMAN	77	33.7555	1.33756	cancer
cancer / NAT	P12270	P12270	P12270	0.463579	0.463579	6.3702e-11	777	P12270	TPR	Nucleoprotein TPR	TPR_HUMAN	188	37.8958	1.37896	cancer
cancer / NAT	O60831	O60831	O60831	-2.13937	2.13937	6.40738e-11	39	O60831	PRAF2	PRA1 family protein 2	PRAF2_HUMAN	8	-77.3022	0.226978	cancer
cancer / NAT	Q13356	Q13356	Q13356	1.27899	1.27899	6.5031e-11	135	Q13356	PPIL2	RING-type E3 ubiquitin-protein ligase PPIL2	PPIL2_HUMAN	39	142.669	2.42669	cancer
cancer / NAT	Q8TED0	Q8TED0	Q8TED0	1.15006	1.15006	6.56501e-11	117	Q8TED0	UTP15	U3 small nucleolar RNA-associated protein 15 homolog	UTP15_HUMAN	31	121.923	2.21923	cancer
cancer / NAT	Q5VTR2	Q5VTR2	Q5VTR2	0.726573	0.726573	6.66888e-11	171	Q5VTR2	RNF20	E3 ubiquitin-protein ligase BRE1A	BRE1A_HUMAN	61	65.4704	1.6547	cancer
cancer / NAT	P21291	P21291	P21291	-1.0746	1.0746	6.69716e-11	99	P21291	CSRP1	Cysteine and glycine-rich protein 1	CSRP1_HUMAN	18	-52.5199	0.474801	cancer
cancer / NAT	Q14254	Q14254	Q14254	-0.455153	0.455153	6.83393e-11	120	Q14254	FLOT2	Flotillin-2	FLOT2_HUMAN	29	-27.0567	0.729433	cancer
cancer / NAT	Q6UXB8	Q6UXB8	Q6UXB8	-1.09195	1.09195	6.92885e-11	72	Q6UXB8	PI16	Peptidase inhibitor 16	PI16_HUMAN	14	-53.0874	0.469126	cancer
cancer / NAT	Q96SU4;Q96SU4-2;Q96SU4-7	Q96SU4;Q96SU4-2;Q96SU4-7	Q96SU4	-0.999919	0.999919	6.99758e-11	123	Q96SU4;Q96SU4-2;Q96SU4-7	OSBPL9	Oxysterol-binding protein-related protein 9;Isoform 2 of Oxysterol-binding protein-related protein 9;Isoform 7 of Oxysterol-binding protein-related protein 9	OSBL9_HUMAN	30	-49.9972	0.500028	cancer
cancer / NAT	Q96HS1	Q96HS1	Q96HS1	1.72146	1.72146	6.99831e-11	108	Q96HS1	PGAM5	Serine/threonine-protein phosphatase PGAM5, mitochondrial	PGAM5_HUMAN	27	229.769	3.29769	cancer
cancer / NAT	P05543	P05543	P05543	-2.08753	2.08753	7.09322e-11	69	P05543	SERPINA7	Thyroxine-binding globulin	THBG_HUMAN	18	-76.4717	0.235283	cancer
cancer / NAT	P67809	P67809	P67809	4.03723	4.03723	7.10359e-11	63	P67809	YBX1	Nuclease-sensitive element-binding protein 1	YBOX1_HUMAN	17	1541.83	16.4183	cancer
cancer / NAT	Q03135	Q03135	Q03135	-2.6785	2.6785	7.12406e-11	27	Q03135	CAV1	Caveolin-1	CAV1_HUMAN	4	-84.3796	0.156204	cancer
cancer / NAT	P07738	P07738	P07738	-0.651388	0.651388	7.15423e-11	75	P07738	BPGM	Bisphosphoglycerate mutase	PMGE_HUMAN	17	-36.3333	0.636667	cancer
cancer / NAT	A1L4H1	A1L4H1	A1L4H1	-3.18811	3.18811	7.18289e-11	63	A1L4H1	SSC5D	Soluble scavenger receptor cysteine-rich domain-containing protein SSC5D	SRCRL_HUMAN	24	-89.0281	0.109719	cancer
cancer / NAT	O14733;O14733-4	O14733;O14733-4	O14733	0.727254	0.727254	7.20727e-11	66	O14733;O14733-4	MAP2K7	Dual specificity mitogen-activated protein kinase kinase 7;Isoform 4 of Dual specificity mitogen-activated protein kinase kinase 7	MP2K7_HUMAN	20	65.5485	1.65548	cancer
cancer / NAT	Q01581	Q01581	Q01581	-1.31586	1.31586	7.36497e-11	81	Q01581	HMGCS1	Hydroxymethylglutaryl-CoA synthase, cytoplasmic	HMCS1_HUMAN	26	-59.8315	0.401685	cancer
cancer / NAT	P31350;P31350-2	P31350;P31350-2	P31350	1.79928	1.79928	7.45342e-11	69	P31350;P31350-2	RRM2	Ribonucleoside-diphosphate reductase subunit M2;Isoform 2 of Ribonucleoside-diphosphate reductase subunit M2	RIR2_HUMAN	19	248.047	3.48047	cancer
cancer / NAT	P04179	P04179	P04179	2.26418	2.26418	7.5513e-11	99	P04179	SOD2	Superoxide dismutase [Mn], mitochondrial	SODM_HUMAN	19	380.382	4.80382	cancer
cancer / NAT	Q96KP1	Q96KP1	Q96KP1	-0.969156	0.969156	7.68098e-11	150	Q96KP1	EXOC2	Exocyst complex component 2	EXOC2_HUMAN	50	-48.9195	0.510805	cancer
cancer / NAT	O60936;O60936-3	O60936;O60936-3	O60936	-1.88719	1.88719	7.70256e-11	33	O60936;O60936-3	NOL3	Nucleolar protein 3;Isoform 3 of Nucleolar protein 3	NOL3_HUMAN	9	-72.9668	0.270332	cancer
cancer / NAT	O75146	O75146	O75146	1.52832	1.52832	7.86932e-11	126	O75146	HIP1R	Huntingtin-interacting protein 1-related protein	HIP1R_HUMAN	55	188.45	2.8845	cancer
cancer / NAT	Q9BVL4	Q9BVL4	Q9BVL4	-0.825772	0.825772	7.89726e-11	69	Q9BVL4	SELENOO	Selenoprotein O	SELO_HUMAN	19	-43.582	0.56418	cancer
cancer / NAT	Q6P2H3;Q6P2H3-2	Q6P2H3;Q6P2H3-2	Q6P2H3	1.21783	1.21783	8.10741e-11	57	Q6P2H3;Q6P2H3-2	CEP85	Centrosomal protein of 85 kDa;Isoform 2 of Centrosomal protein of 85 kDa	CEP85_HUMAN	20	132.596	2.32596	cancer
cancer / NAT	Q9NXU5	Q9NXU5	Q9NXU5	-2.01726	2.01726	8.21826e-11	36	Q9NXU5	ARL15	ADP-ribosylation factor-like protein 15	ARL15_HUMAN	11	-75.2974	0.247026	cancer
cancer / NAT	O95785-3	O95785-3	O95785	1.05797	1.05797	8.22761e-11	111	O95785-3	WIZ	Isoform 3 of Protein Wiz	WIZ_HUMAN	41	108.2	2.082	cancer
cancer / NAT	Q6ZMJ2	Q6ZMJ2	Q6ZMJ2	-2.82937	2.82937	8.3591e-11	51	Q6ZMJ2	SCARA5	Scavenger receptor class A member 5	SCAR5_HUMAN	17	-85.9306	0.140694	cancer
cancer / NAT	Q06830	Q06830	Q06830	0.650075	0.650075	8.40971e-11	186	Q06830	PRDX1	Peroxiredoxin-1	PRDX1_HUMAN	27	56.925	1.56925	cancer
cancer / NAT	P50750;P50750-2	P50750;P50750-2	P50750	0.352743	0.352743	8.42284e-11	42	P50750;P50750-2	CDK9	Cyclin-dependent kinase 9;Isoform 2 of Cyclin-dependent kinase 9	CDK9_HUMAN	16	27.6986	1.27699	cancer
cancer / NAT	P09012	P09012	P09012	0.909047	0.909047	8.67676e-11	102	P09012	SNRPA	U1 small nuclear ribonucleoprotein A	SNRPA_HUMAN	18	87.7805	1.87781	cancer
cancer / NAT	Q9H115	Q9H115	Q9H115	-0.839716	0.839716	8.73288e-11	42	Q9H115	NAPB	Beta-soluble NSF attachment protein	SNAB_HUMAN	14	-44.1247	0.558753	cancer
cancer / NAT	P10301	P10301	P10301	-1.81055	1.81055	8.98589e-11	66	P10301	RRAS	Ras-related protein R-Ras	RRAS_HUMAN	16	-71.4917	0.285083	cancer
cancer / NAT	Q9UPV7	Q9UPV7	Q9UPV7	-1.85705	1.85705	9.14946e-11	57	Q9UPV7	PHF24	PHD finger protein 24	PHF24_HUMAN	21	-72.396	0.27604	cancer
cancer / NAT	Q9Y2W1	Q9Y2W1	Q9Y2W1	0.825965	0.825965	9.14946e-11	282	Q9Y2W1	THRAP3	Thyroid hormone receptor-associated protein 3	TR150_HUMAN	61	77.272	1.77272	cancer
cancer / NAT	Q9UH99	Q9UH99	Q9UH99	-0.933527	0.933527	9.26069e-11	144	Q9UH99	SUN2	SUN domain-containing protein 2	SUN2_HUMAN	37	-47.6423	0.523577	cancer
cancer / NAT	Q06265;Q06265-2	Q06265;Q06265-2	Q06265	1.13787	1.13787	9.26069e-11	57	Q06265;Q06265-2	EXOSC9	Exosome complex component RRP45;Isoform 2 of Exosome complex component RRP45	EXOS9_HUMAN	13	120.056	2.20056	cancer
cancer / NAT	Q9Y2D0	Q9Y2D0	Q9Y2D0	-3.02002	3.02002	9.38576e-11	57	Q9Y2D0	CA5B	Carbonic anhydrase 5B, mitochondrial	CAH5B_HUMAN	14	-87.6722	0.123278	cancer
cancer / NAT	Q9UJX3	Q9UJX3	Q9UJX3	0.782934	0.782934	9.53357e-11	141	Q9UJX3	ANAPC7	Anaphase-promoting complex subunit 7	APC7_HUMAN	33	72.0626	1.72063	cancer
cancer / NAT	P25398	P25398	P25398	0.815935	0.815935	9.54984e-11	75	P25398	RPS12	40S ribosomal protein S12	RS12_HUMAN	15	76.0439	1.76044	cancer
cancer / NAT	Q32P28	Q32P28	Q32P28	-0.840165	0.840165	9.5611e-11	99	Q32P28	P3H1	Prolyl 3-hydroxylase 1	P3H1_HUMAN	33	-44.142	0.55858	cancer
cancer / NAT	P16591	P16591	P16591	-2.00848	2.00848	9.63688e-11	123	P16591	FER	Tyrosine-protein kinase Fer	FER_HUMAN	38	-75.1466	0.248534	cancer
cancer / NAT	O75923-8	O75923-8	O75923	-0.751495	0.751495	9.64597e-11	321	O75923-8	DYSF	Isoform 8 of Dysferlin	DYSF_HUMAN	109	-40.6012	0.593988	cancer
cancer / NAT	Q99683	Q99683	Q99683	-0.391218	0.391218	9.6618e-11	117	Q99683	MAP3K5	Mitogen-activated protein kinase kinase kinase 5	M3K5_HUMAN	63	-23.7514	0.762486	cancer
cancer / NAT	P54819;P54819-2	P54819;P54819-2	P54819	-0.533833	0.533833	9.7199e-11	123	P54819;P54819-2	AK2	Adenylate kinase 2, mitochondrial;Isoform 2 of Adenylate kinase 2, mitochondrial	KAD2_HUMAN	20	-30.9283	0.690717	cancer
cancer / NAT	Q9NSY1	Q9NSY1	Q9NSY1	-0.956674	0.956674	9.83256e-11	84	Q9NSY1	BMP2K	BMP-2-inducible protein kinase	BMP2K_HUMAN	41	-48.4756	0.515244	cancer
cancer / NAT	Q9BQ75;Q9BQ75-2	Q9BQ75;Q9BQ75-2	Q9BQ75	1.10288	1.10288	9.90721e-11	54	Q9BQ75;Q9BQ75-2	CMSS1	Protein CMSS1;Isoform 2 of Protein CMSS1	CMS1_HUMAN	14	114.783	2.14783	cancer
cancer / NAT	Q9H490;Q9H490-2	Q9H490;Q9H490-2	Q9H490	-1.19253	1.19253	1.01374e-10	21	Q9H490;Q9H490-2	PIGU	Phosphatidylinositol glycan anchor biosynthesis class U protein;Isoform 2 of Phosphatidylinositol glycan anchor biosynthesis class U protein	PIGU_HUMAN	5	-56.2465	0.437535	cancer
cancer / NAT	Q6NXE6;Q6NXE6-2	Q6NXE6;Q6NXE6-2	Q6NXE6	1.29583	1.29583	1.01415e-10	111	Q6NXE6;Q6NXE6-2	ARMC6	Armadillo repeat-containing protein 6;Isoform 2 of Armadillo repeat-containing protein 6	ARMC6_HUMAN	21	145.518	2.45518	cancer
cancer / NAT	Q9BW92	Q9BW92	Q9BW92	0.854665	0.854665	1.0316e-10	123	Q9BW92	TARS2	Threonine--tRNA ligase, mitochondrial	SYTM_HUMAN	38	80.8339	1.80834	cancer
cancer / NAT	Q9NTJ5	Q9NTJ5	Q9NTJ5	0.0953067	0.0953067	1.0426e-10	177	Q9NTJ5	SACM1L	Phosphatidylinositide phosphatase SAC1	SAC1_HUMAN	37	6.82925	1.06829	cancer
cancer / NAT	Q13242	Q13242	Q13242	0.550197	0.550197	1.04284e-10	90	Q13242	SRSF9	Serine/arginine-rich splicing factor 9	SRSF9_HUMAN	21	46.4286	1.46429	cancer
cancer / NAT	Q99856	Q99856	Q99856	2.27982	2.27982	1.05794e-10	84	Q99856	ARID3A	AT-rich interactive domain-containing protein 3A	ARI3A_HUMAN	28	385.616	4.85616	cancer
cancer / NAT	Q9HAF1;Q9HAF1-2;Q9HAF1-3;Q9HAF1-4	Q9HAF1;Q9HAF1-2;Q9HAF1-3;Q9HAF1-4	Q9HAF1	1.05573	1.05573	1.06206e-10	30	Q9HAF1;Q9HAF1-2;Q9HAF1-3;Q9HAF1-4	MEAF6	Chromatin modification-related protein MEAF6;Isoform 2 of Chromatin modification-related protein MEAF6;Isoform 3 of Chromatin modification-related protein MEAF6;Isoform 4 of Chromatin modification-related protein MEAF6	EAF6_HUMAN	9	107.877	2.07877	cancer
cancer / NAT	O43823	O43823	O43823	1.29671	1.29671	1.06558e-10	117	O43823	AKAP8	A-kinase anchor protein 8	AKAP8_HUMAN	33	145.668	2.45668	cancer
cancer / NAT	Q5R372;Q5R372-4	Q5R372;Q5R372-4	Q5R372	0.2987	0.2987	1.06917e-10	57	Q5R372;Q5R372-4	RABGAP1L	Rab GTPase-activating protein 1-like;Isoform 4 of Rab GTPase-activating protein 1-like	RBG1L_HUMAN	26	23.0036	1.23004	cancer
cancer / NAT	P07996	P07996	P07996	1.82698	1.82698	1.08045e-10	105	P07996	THBS1	Thrombospondin-1	TSP1_HUMAN	46	254.792	3.54792	cancer
cancer / NAT	Q96HE7	Q96HE7	Q96HE7	-0.609499	0.609499	1.09512e-10	135	Q96HE7	ERO1A	ERO1-like protein alpha	ERO1A_HUMAN	27	-34.4576	0.655424	cancer
cancer / NAT	P50995;P50995-2	P50995;P50995-2	P50995	-0.438255	0.438255	1.09569e-10	135	P50995;P50995-2	ANXA11	Annexin A11;Isoform 2 of Annexin A11	ANX11_HUMAN	28	-26.1973	0.738027	cancer
cancer / NAT	P51808	P51808	P51808	-1.2602	1.2602	1.10339e-10	21	P51808	DYNLT3	Dynein light chain Tctex-type 3	DYLT3_HUMAN	4	-58.2515	0.417485	cancer
cancer / NAT	Q9UP95	Q9UP95	Q9UP95	-2.07167	2.07167	1.12408e-10	90	Q9UP95	SLC12A4	Solute carrier family 12 member 4	S12A4_HUMAN	30	-76.2116	0.237884	cancer
cancer / NAT	Q8N2G8;Q8N2G8-3	Q8N2G8;Q8N2G8-3	Q8N2G8	-1.33989	1.33989	1.14319e-10	90	Q8N2G8;Q8N2G8-3	GHDC	GH3 domain-containing protein;Isoform 3 of GH3 domain-containing protein	GHDC_HUMAN	27	-60.4948	0.395052	cancer
cancer / NAT	Q12955-4;Q12955-5	Q12955-4;Q12955-5	Q12955	-0.949873	0.949873	1.14495e-10	180	Q12955-4;Q12955-5	ANK3	Isoform 2 of Ankyrin-3;Isoform 3 of Ankyrin-3	ANK3_HUMAN	76	-48.2322	0.517678	cancer
cancer / NAT	P21333;P21333-2	P21333;P21333-2	P21333	0.123048	0.123048	1.1482e-10	1149	P21333;P21333-2	FLNA	Filamin-A;Isoform 2 of Filamin-A	FLNA_HUMAN	177	8.90336	1.08903	cancer
cancer / NAT	Q6Y288	Q6Y288	Q6Y288	-1.32658	1.32658	1.14862e-10	39	Q6Y288	B3GLCT	Beta-1,3-glucosyltransferase	B3GLT_HUMAN	21	-60.1289	0.398711	cancer
cancer / NAT	P51649;P51649-2	P51649;P51649-2	P51649	-1.57035	1.57035	1.15217e-10	93	P51649;P51649-2	ALDH5A1	Succinate-semialdehyde dehydrogenase, mitochondrial;Isoform 2 of Succinate-semialdehyde dehydrogenase, mitochondrial	SSDH_HUMAN	29	-66.3274	0.336726	cancer
cancer / NAT	Q9BTC0	Q9BTC0	Q9BTC0	0.748191	0.748191	1.17976e-10	207	Q9BTC0	DIDO1	Death-inducer obliterator 1	DIDO1_HUMAN	96	67.9686	1.67969	cancer
cancer / NAT	Q13449	Q13449	Q13449	-3.50455	3.50455	1.17976e-10	42	Q13449	LSAMP	Limbic system-associated membrane protein	LSAMP_HUMAN	12	-91.189	0.0881102	cancer
cancer / NAT	Q99417	Q99417	Q99417	1.11493	1.11493	1.20999e-10	54	Q99417	MYCBP	c-Myc-binding protein	MYCBP_HUMAN	11	116.585	2.16585	cancer
cancer / NAT	Q15654	Q15654	Q15654	-1.42093	1.42093	1.21342e-10	117	Q15654	TRIP6	Thyroid receptor-interacting protein 6	TRIP6_HUMAN	27	-62.6528	0.373472	cancer
cancer / NAT	P40123	P40123	P40123	0.223883	0.223883	1.21812e-10	57	P40123	CAP2	Adenylyl cyclase-associated protein 2	CAP2_HUMAN	27	16.7873	1.16787	cancer
cancer / NAT	Q8IVL6	Q8IVL6	Q8IVL6	-0.771702	0.771702	1.24398e-10	36	Q8IVL6	P3H3	Prolyl 3-hydroxylase 3	P3H3_HUMAN	19	-41.4274	0.585726	cancer
cancer / NAT	P78395	P78395	P78395	2.77754	2.77754	1.25564e-10	48	P78395	PRAME	Melanoma antigen preferentially expressed in tumors	PRAME_HUMAN	23	585.682	6.85682	cancer
cancer / NAT	O00534	O00534	O00534	-0.92836	0.92836	1.2665e-10	117	O00534	VWA5A	von Willebrand factor A domain-containing protein 5A	VMA5A_HUMAN	38	-47.4545	0.525455	cancer
cancer / NAT	O00410;O00410-3	O00410;O00410-3	O00410	-0.543342	0.543342	1.27005e-10	339	O00410;O00410-3	IPO5	Importin-5;Isoform 3 of Importin-5	IPO5_HUMAN	68	-31.382	0.68618	cancer
cancer / NAT	Q9UKA9;Q9UKA9-2	Q9UKA9;Q9UKA9-2	Q9UKA9	1.87001	1.87001	1.27545e-10	69	Q9UKA9;Q9UKA9-2	PTBP2	Polypyrimidine tract-binding protein 2;Isoform 2 of Polypyrimidine tract-binding protein 2	PTBP2_HUMAN	23	265.535	3.65535	cancer
cancer / NAT	Q7Z434	Q7Z434	Q7Z434	-0.339866	0.339866	1.28017e-10	111	Q7Z434	MAVS	Mitochondrial antiviral-signaling protein	MAVS_HUMAN	27	-20.9885	0.790115	cancer
cancer / NAT	Q13509	Q13509	Q13509	0.855974	0.855974	1.32029e-10	96	Q13509	TUBB3	Tubulin beta-3 chain	TBB3_HUMAN	16	80.9981	1.80998	cancer
cancer / NAT	P25391	P25391	P25391	-0.0517476	0.0517476	1.37811e-10	573	P25391	LAMA1	Laminin subunit alpha-1	LAMA1_HUMAN	145	-3.52331	0.964767	cancer
cancer / NAT	Q15139	Q15139	Q15139	-2.9034	2.9034	1.38153e-10	63	Q15139	PRKD1	Serine/threonine-protein kinase D1	KPCD1_HUMAN	24	-86.6344	0.133656	cancer
cancer / NAT	P62318;P62318-2	P62318;P62318-2	P62318	0.986577	0.986577	1.3851e-10	48	P62318;P62318-2	SNRPD3	Small nuclear ribonucleoprotein Sm D3;Isoform 2 of Small nuclear ribonucleoprotein Sm D3	SMD3_HUMAN	5	98.1479	1.98148	cancer
cancer / NAT	P07954;P07954-2	P07954;P07954-2	P07954	-0.339206	0.339206	1.38605e-10	192	P07954;P07954-2	FH	Fumarate hydratase, mitochondrial;Isoform Cytoplasmic of Fumarate hydratase, mitochondrial	FUMH_HUMAN	28	-20.9524	0.790476	cancer
cancer / NAT	P34059	P34059	P34059	-2.50853	2.50853	1.38605e-10	78	P34059	GALNS	N-acetylgalactosamine-6-sulfatase	GALNS_HUMAN	21	-82.4265	0.175735	cancer
cancer / NAT	Q9UFC0	Q9UFC0	Q9UFC0	1.08805	1.08805	1.38803e-10	123	Q9UFC0	LRWD1	Leucine-rich repeat and WD repeat-containing protein 1	LRWD1_HUMAN	32	112.587	2.12587	cancer
cancer / NAT	P51532	P51532	P51532	0.351894	0.351894	1.38964e-10	144	P51532	SMARCA4	Transcription activator BRG1	SMCA4_HUMAN	39	27.6235	1.27624	cancer
cancer / NAT	Q9H9Z2	Q9H9Z2	Q9H9Z2	3.32715	3.32715	1.39222e-10	72	Q9H9Z2	LIN28A	Protein lin-28 homolog A	LN28A_HUMAN	16	903.629	10.0363	cancer
cancer / NAT	Q13895	Q13895	Q13895	1.22605	1.22605	1.43133e-10	114	Q13895	BYSL	Bystin	BYST_HUMAN	31	133.926	2.33926	cancer
cancer / NAT	P49411	P49411	P49411	0.461184	0.461184	1.43313e-10	297	P49411	TUFM	Elongation factor Tu, mitochondrial	EFTU_HUMAN	42	37.6671	1.37667	cancer
cancer / NAT	P56279	P56279	P56279	2.09373	2.09373	1.44782e-10	63	P56279	TCL1A	T-cell leukemia/lymphoma protein 1A	TCL1A_HUMAN	10	326.849	4.26849	cancer
cancer / NAT	Q13523	Q13523	Q13523	0.942408	0.942408	1.45048e-10	189	Q13523	PRPF4B	Serine/threonine-protein kinase PRP4 homolog	PRP4B_HUMAN	57	92.1733	1.92173	cancer
cancer / NAT	Q9Y4K3	Q9Y4K3	Q9Y4K3	-0.388149	0.388149	1.45957e-10	54	Q9Y4K3	TRAF6	TNF receptor-associated factor 6	TRAF6_HUMAN	21	-23.5891	0.764109	cancer
cancer / NAT	Q8WTX7	Q8WTX7	Q8WTX7	-1.42388	1.42388	1.46488e-10	24	Q8WTX7	CASTOR1	Cytosolic arginine sensor for mTORC1 subunit 1	CAST1_HUMAN	9	-62.7291	0.372709	cancer
cancer / NAT	P19387	P19387	P19387	0.890675	0.890675	1.46652e-10	72	P19387	POLR2C	DNA-directed RNA polymerase II subunit RPB3	RPB3_HUMAN	17	85.4044	1.85404	cancer
cancer / NAT	Q9NUQ6-2	Q9NUQ6-2	Q9NUQ6	-1.21446	1.21446	1.48317e-10	63	Q9NUQ6-2	SPATS2L	Isoform 2 of SPATS2-like protein	SPS2L_HUMAN	25	-56.9065	0.430935	cancer
cancer / NAT	P11177;P11177-2	P11177;P11177-2	P11177	-0.609453	0.609453	1.4841e-10	120	P11177;P11177-2	PDHB	Pyruvate dehydrogenase E1 component subunit beta, mitochondrial;Isoform 2 of Pyruvate dehydrogenase E1 component subunit beta, mitochondrial	ODPB_HUMAN	21	-34.4555	0.655445	cancer
cancer / NAT	P43487;P43487-2	P43487;P43487-2	P43487	1.03136	1.03136	1.52579e-10	108	P43487;P43487-2	RANBP1	Ran-specific GTPase-activating protein;Isoform 2 of Ran-specific GTPase-activating protein	RANG_HUMAN	18	104.395	2.04395	cancer
cancer / NAT	Q9NZ01	Q9NZ01	Q9NZ01	-1.0962	1.0962	1.56823e-10	126	Q9NZ01	TECR	Very-long-chain enoyl-CoA reductase	TECR_HUMAN	19	-53.2255	0.467745	cancer
cancer / NAT	O75934	O75934	O75934	1.01354	1.01354	1.57938e-10	81	O75934	BCAS2	Pre-mRNA-splicing factor SPF27	SPF27_HUMAN	16	101.886	2.01886	cancer
cancer / NAT	Q9BU02	Q9BU02	Q9BU02	-1.7858	1.7858	1.57938e-10	33	Q9BU02	THTPA	Thiamine-triphosphatase	THTPA_HUMAN	15	-70.9986	0.290014	cancer
cancer / NAT	Q8TCG1	Q8TCG1	Q8TCG1	-0.278662	0.278662	1.5872e-10	165	Q8TCG1	CIP2A	Protein CIP2A	CIP2A_HUMAN	48	-17.5645	0.824355	cancer
cancer / NAT	P12004	P12004	P12004	1.3779	1.3779	1.62229e-10	105	P12004	PCNA	Proliferating cell nuclear antigen	PCNA_HUMAN	19	159.89	2.5989	cancer
cancer / NAT	P06733	P06733	P06733	0.504348	0.504348	1.63424e-10	297	P06733	ENO1	Alpha-enolase	ENOA_HUMAN	39	41.8482	1.41848	cancer
cancer / NAT	Q14247-3	Q14247-3	Q14247	-0.96857	0.96857	1.64313e-10	222	Q14247-3	CTTN	Isoform 3 of Src substrate cortactin	SRC8_HUMAN	47	-48.8988	0.511012	cancer
cancer / NAT	Q13423	Q13423	Q13423	-0.376756	0.376756	1.70033e-10	231	Q13423	NNT	NAD(P) transhydrogenase, mitochondrial	NNTM_HUMAN	55	-22.9832	0.770168	cancer
cancer / NAT	Q14118	Q14118	Q14118	-0.730437	0.730437	1.73692e-10	120	Q14118	DAG1	Dystroglycan	DAG1_HUMAN	36	-39.7279	0.602721	cancer
cancer / NAT	Q8IY18	Q8IY18	Q8IY18	0.48347	0.48347	1.75067e-10	198	Q8IY18	SMC5	Structural maintenance of chromosomes protein 5	SMC5_HUMAN	70	39.8102	1.3981	cancer
cancer / NAT	P06703	P06703	P06703	-2.40467	2.40467	1.7537e-10	60	P06703	S100A6	Protein S100-A6	S10A6_HUMAN	13	-81.1147	0.188853	cancer
cancer / NAT	P08621	P08621	P08621	1.33857	1.33857	1.78734e-10	135	P08621	SNRNP70	U1 small nuclear ribonucleoprotein 70 kDa	RU17_HUMAN	27	152.9	2.529	cancer
cancer / NAT	Q9HC16	Q9HC16	Q9HC16	-0.84151	0.84151	1.81666e-10	102	Q9HC16	APOBEC3G	DNA dC->dU-editing enzyme APOBEC-3G	ABC3G_HUMAN	22	-44.1941	0.558059	cancer
cancer / NAT	Q9UNQ2	Q9UNQ2	Q9UNQ2	0.890896	0.890896	1.83589e-10	63	Q9UNQ2	DIMT1	Probable dimethyladenosine transferase	DIM1_HUMAN	19	85.4327	1.85433	cancer
cancer / NAT	Q7L014	Q7L014	Q7L014	0.779068	0.779068	1.86948e-10	342	Q7L014	DDX46	Probable ATP-dependent RNA helicase DDX46	DDX46_HUMAN	78	71.6022	1.71602	cancer
cancer / NAT	Q00765	Q00765	Q00765	-0.791773	0.791773	1.89296e-10	57	Q00765	REEP5	Receptor expression-enhancing protein 5	REEP5_HUMAN	10	-42.2366	0.577634	cancer
cancer / NAT	Q14767	Q14767	Q14767	-0.825665	0.825665	1.90536e-10	153	Q14767	LTBP2	Latent-transforming growth factor beta-binding protein 2	LTBP2_HUMAN	47	-43.5778	0.564222	cancer
cancer / NAT	Q9H7C9	Q9H7C9	Q9H7C9	-1.6687	1.6687	1.91211e-10	42	Q9H7C9	AAMDC	Mth938 domain-containing protein	AAMDC_HUMAN	11	-68.5464	0.314536	cancer
cancer / NAT	O60870	O60870	O60870	1.49168	1.49168	1.91211e-10	66	O60870	KIN	DNA/RNA-binding protein KIN17	KIN17_HUMAN	25	181.216	2.81216	cancer
cancer / NAT	Q9NQG5	Q9NQG5	Q9NQG5	1.12274	1.12274	1.93076e-10	81	Q9NQG5	RPRD1B	Regulation of nuclear pre-mRNA domain-containing protein 1B	RPR1B_HUMAN	18	117.76	2.1776	cancer
cancer / NAT	Q9NRF8	Q9NRF8	Q9NRF8	-1.27868	1.27868	1.93406e-10	75	Q9NRF8	CTPS2	CTP synthase 2	PYRG2_HUMAN	27	-58.7827	0.412173	cancer
cancer / NAT	O43172;O43172-2	O43172;O43172-2	O43172	1.07047	1.07047	1.94423e-10	141	O43172;O43172-2	PRPF4	U4/U6 small nuclear ribonucleoprotein Prp4;Isoform 2 of U4/U6 small nuclear ribonucleoprotein Prp4	PRP4_HUMAN	33	110.012	2.10012	cancer
cancer / NAT	P52895	P52895	P52895	-3.7313	3.7313	1.94985e-10	39	P52895	AKR1C2	Aldo-keto reductase family 1 member C2	AK1C2_HUMAN	6	-92.4705	0.0752952	cancer
cancer / NAT	P01034	P01034	P01034	-2.36057	2.36057	1.97028e-10	63	P01034	CST3	Cystatin-C	CYTC_HUMAN	10	-80.5286	0.194714	cancer
cancer / NAT	P23786	P23786	P23786	-0.371425	0.371425	1.9838e-10	240	P23786	CPT2	Carnitine O-palmitoyltransferase 2, mitochondrial	CPT2_HUMAN	56	-22.6982	0.773018	cancer
cancer / NAT	Q9Y4K0	Q9Y4K0	Q9Y4K0	3.12528	3.12528	1.99006e-10	69	Q9Y4K0	LOXL2	Lysyl oxidase homolog 2	LOXL2_HUMAN	22	772.576	8.72576	cancer
cancer / NAT	O95758-1	O95758-1	O95758	1.20505	1.20505	2.00698e-10	141	O95758-1	PTBP3	Isoform 1 of Polypyrimidine tract-binding protein 3	PTBP3_HUMAN	24	130.545	2.30545	cancer
cancer / NAT	P29083	P29083	P29083	1.0386	1.0386	2.00698e-10	102	P29083	GTF2E1	General transcription factor IIE subunit 1	T2EA_HUMAN	24	105.424	2.05424	cancer
cancer / NAT	Q5TD97	Q5TD97	Q5TD97	-2.36109	2.36109	2.01503e-10	60	Q5TD97	FHL5	Four and a half LIM domains protein 5	FHL5_HUMAN	25	-80.5356	0.194644	cancer
cancer / NAT	Q9H2U1	Q9H2U1	Q9H2U1	0.669283	0.669283	2.10952e-10	198	Q9H2U1	DHX36	ATP-dependent RNA helicase DHX36	DHX36_HUMAN	51	59.0283	1.59028	cancer
cancer / NAT	Q7L190	Q7L190	Q7L190	3.20566	3.20566	2.11313e-10	33	Q7L190	DPPA4	Developmental pluripotency-associated protein 4	DPPA4_HUMAN	13	822.569	9.22569	cancer
cancer / NAT	Q9H9J2	Q9H9J2	Q9H9J2	0.497111	0.497111	2.12899e-10	75	Q9H9J2	MRPL44	39S ribosomal protein L44, mitochondrial	RM44_HUMAN	21	41.1384	1.41138	cancer
cancer / NAT	Q14807	Q14807	Q14807	1.39594	1.39594	2.12982e-10	108	Q14807	KIF22	Kinesin-like protein KIF22	KIF22_HUMAN	35	163.161	2.63161	cancer
cancer / NAT	P0DMV8;P0DMV9	P0DMV8;P0DMV9	P0DMV8	-0.155423	0.155423	2.14445e-10	357	P0DMV8;P0DMV9	HSPA1A;HSPA1B	Heat shock 70 kDa protein 1A;Heat shock 70 kDa protein 1B	HS71A_HUMAN;HS71B_HUMAN	58	-10.2131	0.897869	cancer
cancer / NAT	Q9H9T3	Q9H9T3	Q9H9T3	0.609102	0.609102	2.17367e-10	135	Q9H9T3	ELP3	Elongator complex protein 3	ELP3_HUMAN	33	52.531	1.52531	cancer
cancer / NAT	Q9NVI7-2	Q9NVI7-2	Q9NVI7	0.946009	0.946009	2.23806e-10	72	Q9NVI7-2	ATAD3A	Isoform 2 of ATPase family AAA domain-containing protein 3A	ATD3A_HUMAN	19	92.6536	1.92654	cancer
cancer / NAT	Q16881	Q16881	Q16881	0.652217	0.652217	2.24844e-10	231	Q16881	TXNRD1	Thioredoxin reductase 1, cytoplasmic	TRXR1_HUMAN	41	57.1582	1.57158	cancer
cancer / NAT	Q6ZU65	Q6ZU65	Q6ZU65	1.5829	1.5829	2.25499e-10	108	Q6ZU65	UBN2	Ubinuclein-2	UBN2_HUMAN	44	199.57	2.9957	cancer
cancer / NAT	P35475	P35475	P35475	-1.9417	1.9417	2.26078e-10	69	P35475	IDUA	Alpha-L-iduronidase	IDUA_HUMAN	24	-73.969	0.26031	cancer
cancer / NAT	Q6UX71	Q6UX71	Q6UX71	-1.77113	1.77113	2.27403e-10	57	Q6UX71	PLXDC2	Plexin domain-containing protein 2	PXDC2_HUMAN	14	-70.7021	0.292979	cancer
cancer / NAT	O43660	O43660	O43660	0.817453	0.817453	2.27535e-10	189	O43660	PLRG1	Pleiotropic regulator 1	PLRG1_HUMAN	36	76.2292	1.76229	cancer
cancer / NAT	O14776;O14776-2	O14776;O14776-2	O14776	0.432588	0.432588	2.27535e-10	228	O14776;O14776-2	TCERG1	Transcription elongation regulator 1;Isoform 2 of Transcription elongation regulator 1	TCRG1_HUMAN	54	34.9652	1.34965	cancer
cancer / NAT	O14802	O14802	O14802	0.777328	0.777328	2.35157e-10	144	O14802	POLR3A	DNA-directed RNA polymerase III subunit RPC1	RPC1_HUMAN	77	71.3954	1.71395	cancer
cancer / NAT	Q15113	Q15113	Q15113	-1.2625	1.2625	2.35374e-10	63	Q15113	PCOLCE	Procollagen C-endopeptidase enhancer 1	PCOC1_HUMAN	21	-58.3178	0.416822	cancer
cancer / NAT	P14621	P14621	P14621	-1.11428	1.11428	2.38791e-10	24	P14621	ACYP2	Acylphosphatase-2	ACYP2_HUMAN	9	-53.8077	0.461923	cancer
cancer / NAT	Q9UKM9-2	Q9UKM9-2	Q9UKM9	1.51031	1.51031	2.41076e-10	138	Q9UKM9-2	RALY	Isoform 1 of RNA-binding protein Raly	RALY_HUMAN	25	184.872	2.84872	cancer
cancer / NAT	Q7KZF4	Q7KZF4	Q7KZF4	0.614338	0.614338	2.41619e-10	477	Q7KZF4	SND1	Staphylococcal nuclease domain-containing protein 1	SND1_HUMAN	78	53.0855	1.53086	cancer
cancer / NAT	P62081	P62081	P62081	1.49684	1.49684	2.42041e-10	132	P62081	RPS7	40S ribosomal protein S7	RS7_HUMAN	21	182.224	2.82224	cancer
cancer / NAT	Q92878;Q92878-2	Q92878;Q92878-2	Q92878	0.586596	0.586596	2.44534e-10	423	Q92878;Q92878-2	RAD50	DNA repair protein RAD50;Isoform 2 of DNA repair protein RAD50	RAD50_HUMAN	114	50.1699	1.5017	cancer
cancer / NAT	P99999	P99999	P99999	0.53539	0.53539	2.45953e-10	141	P99999	CYCS	Cytochrome c	CYC_HUMAN	18	44.9334	1.44933	cancer
cancer / NAT	P49642	P49642	P49642	1.62457	1.62457	2.48214e-10	99	P49642	PRIM1	DNA primase small subunit	PRI1_HUMAN	30	208.35	3.0835	cancer
cancer / NAT	O95925-3	O95925-3	O95925	-3.48078	3.48078	2.48214e-10	45	O95925-3	EPPIN	Isoform 3 of Eppin	EPPI_HUMAN	10	-91.0427	0.0895735	cancer
cancer / NAT	Q8WUM4-2	Q8WUM4-2	Q8WUM4	-0.283288	0.283288	2.49338e-10	378	Q8WUM4-2	PDCD6IP	Isoform 2 of Programmed cell death 6-interacting protein	PDC6I_HUMAN	75	-17.8284	0.821716	cancer
cancer / NAT	A1A4S6	A1A4S6	A1A4S6	-2.09626	2.09626	2.52095e-10	78	A1A4S6	ARHGAP10	Rho GTPase-activating protein 10	RHG10_HUMAN	35	-76.6136	0.233864	cancer
cancer / NAT	Q13642-1;Q13642-4;Q13642-5	Q13642-1;Q13642-4;Q13642-5	Q13642	-1.4067	1.4067	2.5303e-10	126	Q13642-1;Q13642-4;Q13642-5	FHL1	Isoform 1 of Four and a half LIM domains protein 1;Isoform 4 of Four and a half LIM domains protein 1;Isoform 5 of Four and a half LIM domains protein 1	FHL1_HUMAN	28	-62.2826	0.377174	cancer
cancer / NAT	Q9BYN8	Q9BYN8	Q9BYN8	0.893831	0.893831	2.54229e-10	54	Q9BYN8	MRPS26	28S ribosomal protein S26, mitochondrial	RT26_HUMAN	10	85.8104	1.8581	cancer
cancer / NAT	Q587J8	Q587J8	Q587J8	1.33531	1.33531	2.60955e-10	69	Q587J8	KHDC3L	KHDC3-like protein	KHD3L_HUMAN	15	152.329	2.52329	cancer
cancer / NAT	Q13685	Q13685	Q13685	0.69809	0.69809	2.61407e-10	57	Q13685	AAMP	Angio-associated migratory cell protein	AAMP_HUMAN	16	62.2355	1.62236	cancer
cancer / NAT	Q6ZNJ1	Q6ZNJ1	Q6ZNJ1	-0.660574	0.660574	2.61511e-10	111	Q6ZNJ1	NBEAL2	Neurobeachin-like protein 2	NBEL2_HUMAN	66	-36.7373	0.632627	cancer
cancer / NAT	Q13442	Q13442	Q13442	0.996553	0.996553	2.63328e-10	120	Q13442	PDAP1	28 kDa heat- and acid-stable phosphoprotein	HAP28_HUMAN	26	99.5227	1.99523	cancer
cancer / NAT	O95696-2	O95696-2	O95696	1.16856	1.16856	2.66031e-10	159	O95696-2	BRD1	Isoform 2 of Bromodomain-containing protein 1	BRD1_HUMAN	58	124.787	2.24787	cancer
cancer / NAT	P35236;P35236-2;P35236-3	P35236;P35236-2;P35236-3	P35236	-0.892995	0.892995	2.66182e-10	45	P35236;P35236-2;P35236-3	PTPN7	Tyrosine-protein phosphatase non-receptor type 7;Isoform 2 of Tyrosine-protein phosphatase non-receptor type 7;Isoform 3 of Tyrosine-protein phosphatase non-receptor type 7	PTN7_HUMAN	17	-46.1505	0.538495	cancer
cancer / NAT	Q9BW30	Q9BW30	Q9BW30	-2.19791	2.19791	2.66932e-10	45	Q9BW30	TPPP3	Tubulin polymerization-promoting protein family member 3	TPPP3_HUMAN	16	-78.2047	0.217953	cancer
cancer / NAT	Q8N4C8	Q8N4C8	Q8N4C8	-1.19545	1.19545	2.67617e-10	108	Q8N4C8	MINK1	Misshapen-like kinase 1	MINK1_HUMAN	36	-56.3349	0.436651	cancer
cancer / NAT	Q14847	Q14847	Q14847	0.75282	0.75282	2.70892e-10	159	Q14847	LASP1	LIM and SH3 domain protein 1	LASP1_HUMAN	27	68.5084	1.68508	cancer
cancer / NAT	Q96FQ6	Q96FQ6	Q96FQ6	-1.88732	1.88732	2.81672e-10	51	Q96FQ6	S100A16	Protein S100-A16	S10AG_HUMAN	8	-72.9691	0.270309	cancer
cancer / NAT	P36980	P36980	P36980	-2.13091	2.13091	2.82386e-10	18	P36980	CFHR2	Complement factor H-related protein 2	FHR2_HUMAN	7	-77.1686	0.228314	cancer
cancer / NAT	Q99848	Q99848	Q99848	1.12296	1.12296	2.84658e-10	96	Q99848	EBNA1BP2	Probable rRNA-processing protein EBP2	EBP2_HUMAN	25	117.793	2.17793	cancer
cancer / NAT	Q9Y3Q8	Q9Y3Q8	Q9Y3Q8	-1.35212	1.35212	2.88505e-10	39	Q9Y3Q8	TSC22D4	TSC22 domain family protein 4	T22D4_HUMAN	17	-60.8285	0.391715	cancer
cancer / NAT	Q5SY16	Q5SY16	Q5SY16	1.07317	1.07317	2.88902e-10	129	Q5SY16	NOL9	Polynucleotide 5'-hydroxyl-kinase NOL9	NOL9_HUMAN	30	110.404	2.10404	cancer
cancer / NAT	Q86U38	Q86U38	Q86U38	1.29272	1.29272	2.92767e-10	99	Q86U38	NOP9	Nucleolar protein 9	NOP9_HUMAN	30	144.99	2.4499	cancer
cancer / NAT	Q969X6	Q969X6	Q969X6	0.600387	0.600387	2.94552e-10	132	Q969X6	UTP4	U3 small nucleolar RNA-associated protein 4 homolog	UTP4_HUMAN	32	51.6123	1.51612	cancer
cancer / NAT	P02766	P02766	P02766	-1.08483	1.08483	2.96435e-10	93	P02766	TTR	Transthyretin	TTHY_HUMAN	17	-52.8552	0.471448	cancer
cancer / NAT	P36639;P36639-2;P36639-3;P36639-4	P36639;P36639-2;P36639-3;P36639-4	P36639	1.93631	1.93631	2.98555e-10	36	P36639;P36639-2;P36639-3;P36639-4	NUDT1	7,8-dihydro-8-oxoguanine triphosphatase;Isoform p22 of 7,8-dihydro-8-oxoguanine triphosphatase;Isoform p21 of 7,8-dihydro-8-oxoguanine triphosphatase;Isoform p18 of 7,8-dihydro-8-oxoguanine triphosphatase	8ODP_HUMAN	8	282.727	3.82727	cancer
cancer / NAT	P16219	P16219	P16219	0.55765	0.55765	3.02774e-10	126	P16219	ACADS	Short-chain specific acyl-CoA dehydrogenase, mitochondrial	ACADS_HUMAN	22	47.187	1.47187	cancer
cancer / NAT	O43264	O43264	O43264	-0.755382	0.755382	3.0794e-10	120	O43264	ZW10	Centromere/kinetochore protein zw10 homolog	ZW10_HUMAN	47	-40.761	0.59239	cancer
cancer / NAT	Q7Z3B1	Q7Z3B1	Q7Z3B1	-3.96313	3.96313	3.1109e-10	39	Q7Z3B1	NEGR1	Neuronal growth regulator 1	NEGR1_HUMAN	15	-93.5882	0.0641179	cancer
cancer / NAT	Q9Y281	Q9Y281	Q9Y281	0.153046	0.153046	3.12428e-10	99	Q9Y281	CFL2	Cofilin-2	COF2_HUMAN	22	11.1914	1.11191	cancer
cancer / NAT	P49789	P49789	P49789	-1.95507	1.95507	3.17152e-10	66	P49789	FHIT	Bis(5'-adenosyl)-triphosphatase	FHIT_HUMAN	11	-74.2091	0.257909	cancer
cancer / NAT	Q08431	Q08431	Q08431	-1.33957	1.33957	3.18748e-10	93	Q08431	MFGE8	Lactadherin	MFGM_HUMAN	22	-60.4863	0.395137	cancer
cancer / NAT	Q9BYG5	Q9BYG5	Q9BYG5	-1.30876	1.30876	3.31865e-10	33	Q9BYG5	PARD6B	Partitioning defective 6 homolog beta	PAR6B_HUMAN	11	-59.6331	0.403669	cancer
cancer / NAT	Q6ZW31	Q6ZW31	Q6ZW31	-1.54513	1.54513	3.32974e-10	30	Q6ZW31	SYDE1	Rho GTPase-activating protein SYDE1	SYDE1_HUMAN	19	-65.7335	0.342665	cancer
cancer / NAT	Q96LD4	Q96LD4	Q96LD4	-1.44455	1.44455	3.4339e-10	105	Q96LD4	TRIM47	Tripartite motif-containing protein 47	TRI47_HUMAN	27	-63.2593	0.367407	cancer
cancer / NAT	Q9Y6W3	Q9Y6W3	Q9Y6W3	-0.53329	0.53329	3.46228e-10	90	Q9Y6W3	CAPN7	Calpain-7	CAN7_HUMAN	39	-30.9023	0.690977	cancer
cancer / NAT	P46783	P46783	P46783	1.23644	1.23644	3.48303e-10	120	P46783	RPS10	40S ribosomal protein S10	RS10_HUMAN	20	135.616	2.35616	cancer
cancer / NAT	P49903	P49903	P49903	0.940835	0.940835	3.54522e-10	99	P49903	SEPHS1	Selenide, water dikinase 1	SPS1_HUMAN	16	91.9639	1.91964	cancer
cancer / NAT	P47813	P47813	P47813	1.38968	1.38968	3.54938e-10	69	P47813	EIF1AX	Eukaryotic translation initiation factor 1A, X-chromosomal	IF1AX_HUMAN	12	162.02	2.6202	cancer
cancer / NAT	O95219	O95219	O95219	-1.40963	1.40963	3.65897e-10	87	O95219	SNX4	Sorting nexin-4	SNX4_HUMAN	31	-62.3591	0.376409	cancer
cancer / NAT	Q92619	Q92619	Q92619	1.10143	1.10143	3.7164e-10	126	Q92619	ARHGAP45	Rho GTPase-activating protein 45	HMHA1_HUMAN	47	114.568	2.14568	cancer
cancer / NAT	Q9Y3D0	Q9Y3D0	Q9Y3D0	0.781232	0.781232	3.75879e-10	48	Q9Y3D0	FAM96B	Mitotic spindle-associated MMXD complex subunit MIP18	MIP18_HUMAN	10	71.8597	1.7186	cancer
cancer / NAT	Q9HC35	Q9HC35	Q9HC35	0.551478	0.551478	3.78981e-10	306	Q9HC35	EML4	Echinoderm microtubule-associated protein-like 4	EMAL4_HUMAN	63	46.5587	1.46559	cancer
cancer / NAT	Q14849;Q14849-2;Q14849-3	Q14849;Q14849-2;Q14849-3	Q14849	-0.988232	0.988232	3.80534e-10	24	Q14849;Q14849-2;Q14849-3	STARD3	StAR-related lipid transfer protein 3;Isoform 2 of StAR-related lipid transfer protein 3;Isoform 3 of StAR-related lipid transfer protein 3	STAR3_HUMAN	10	-49.5905	0.504095	cancer
cancer / NAT	O95822	O95822	O95822	-0.935476	0.935476	3.86893e-10	63	O95822	MLYCD	Malonyl-CoA decarboxylase, mitochondrial	DCMC_HUMAN	25	-47.713	0.52287	cancer
cancer / NAT	Q96BP3	Q96BP3	Q96BP3	1.05486	1.05486	3.92981e-10	162	Q96BP3	PPWD1	Peptidylprolyl isomerase domain and WD repeat-containing protein 1	PPWD1_HUMAN	38	107.752	2.07752	cancer
cancer / NAT	Q9P2K5	Q9P2K5	Q9P2K5	-1.99082	1.99082	3.99897e-10	66	Q9P2K5	MYEF2	Myelin expression factor 2	MYEF2_HUMAN	21	-74.8405	0.251595	cancer
cancer / NAT	P05452	P05452	P05452	-1.82669	1.82669	4.08606e-10	51	P05452	CLEC3B	Tetranectin	TETN_HUMAN	11	-71.8089	0.281911	cancer
cancer / NAT	Q96GZ6-5;Q96GZ6-6;Q96GZ6-9	Q96GZ6-5;Q96GZ6-6;Q96GZ6-9	Q96GZ6	-2.22174	2.22174	4.17362e-10	27	Q96GZ6-5;Q96GZ6-6;Q96GZ6-9	SLC41A3	Isoform 5 of Solute carrier family 41 member 3;Isoform 6 of Solute carrier family 41 member 3;Isoform 9 of Solute carrier family 41 member 3	S41A3_HUMAN	12	-78.5617	0.214383	cancer
cancer / NAT	Q6RFH5	Q6RFH5	Q6RFH5	1.47888	1.47888	4.17928e-10	84	Q6RFH5	WDR74	WD repeat-containing protein 74	WDR74_HUMAN	22	178.732	2.78732	cancer
cancer / NAT	Q9P287	Q9P287	Q9P287	0.0298534	0.0298534	4.24473e-10	87	Q9P287	BCCIP	BRCA2 and CDKN1A-interacting protein	BCCIP_HUMAN	22	2.09084	1.02091	cancer
cancer / NAT	P05413	P05413	P05413	-1.22117	1.22117	4.2879e-10	63	P05413	FABP3	Fatty acid-binding protein, heart	FABPH_HUMAN	14	-57.1064	0.428936	cancer
cancer / NAT	Q6PL18	Q6PL18	Q6PL18	1.12601	1.12601	4.35364e-10	168	Q6PL18	ATAD2	ATPase family AAA domain-containing protein 2	ATAD2_HUMAN	59	118.255	2.18255	cancer
cancer / NAT	P20839-3;P20839-5;P20839-6;P20839-7	P20839-3;P20839-5;P20839-6;P20839-7	P20839	0.723536	0.723536	4.47343e-10	102	P20839-3;P20839-5;P20839-6;P20839-7	IMPDH1	Isoform 3 of Inosine-5'-monophosphate dehydrogenase 1;Isoform 5 of Inosine-5'-monophosphate dehydrogenase 1;Isoform 6 of Inosine-5'-monophosphate dehydrogenase 1;Isoform 7 of Inosine-5'-monophosphate dehydrogenase 1	IMDH1_HUMAN	27	65.1225	1.65122	cancer
cancer / NAT	Q9Y5L4	Q9Y5L4	Q9Y5L4	1.07152	1.07152	4.48198e-10	36	Q9Y5L4	TIMM13	Mitochondrial import inner membrane translocase subunit Tim13	TIM13_HUMAN	9	110.165	2.10165	cancer
cancer / NAT	P53667;P53667-2	P53667;P53667-2	P53667	0.998286	0.998286	4.60316e-10	84	P53667;P53667-2	LIMK1	LIM domain kinase 1;Isoform 2 of LIM domain kinase 1	LIMK1_HUMAN	29	99.7625	1.99762	cancer
cancer / NAT	O60664-3	O60664-3	O60664	-0.452533	0.452533	4.60316e-10	93	O60664-3	PLIN3	Isoform 3 of Perilipin-3	PLIN3_HUMAN	13	-26.9241	0.730759	cancer
cancer / NAT	O14908	O14908	O14908	0.643663	0.643663	4.70333e-10	72	O14908	GIPC1	PDZ domain-containing protein GIPC1	GIPC1_HUMAN	25	56.2291	1.56229	cancer
cancer / NAT	Q9NXW9	Q9NXW9	Q9NXW9	0.717672	0.717672	4.7278e-10	45	Q9NXW9	ALKBH4	Alpha-ketoglutarate-dependent dioxygenase alkB homolog 4	ALKB4_HUMAN	14	64.4526	1.64453	cancer
cancer / NAT	O15117-2;O15117-3	O15117-2;O15117-3	O15117	1.60377	1.60377	4.73759e-10	105	O15117-2;O15117-3	FYB1	Isoform FYB-130 of FYN-binding protein 1;Isoform 3 of FYN-binding protein 1	FYB1_HUMAN	34	203.936	3.03936	cancer
cancer / NAT	Q01844;Q01844-3;Q01844-5;Q01844-6	Q01844;Q01844-3;Q01844-5;Q01844-6	Q01844	1.08754	1.08754	4.73759e-10	81	Q01844;Q01844-3;Q01844-5;Q01844-6	EWSR1	RNA-binding protein EWS;Isoform 3 of RNA-binding protein EWS;Isoform 5 of RNA-binding protein EWS;Isoform 6 of RNA-binding protein EWS	EWS_HUMAN	13	112.512	2.12512	cancer
cancer / NAT	Q96CT7	Q96CT7	Q96CT7	0.981319	0.981319	4.76648e-10	99	Q96CT7	CCDC124	Coiled-coil domain-containing protein 124	CC124_HUMAN	19	97.4269	1.97427	cancer
cancer / NAT	P06132	P06132	P06132	-0.257415	0.257415	4.7901e-10	87	P06132	UROD	Uroporphyrinogen decarboxylase	DCUP_HUMAN	17	-16.3415	0.836585	cancer
cancer / NAT	Q13232	Q13232	Q13232	-1.21267	1.21267	4.83754e-10	51	Q13232	NME3	Nucleoside diphosphate kinase 3	NDK3_HUMAN	12	-56.8531	0.431469	cancer
cancer / NAT	Q12905	Q12905	Q12905	0.499113	0.499113	4.84914e-10	216	Q12905	ILF2	Interleukin enhancer-binding factor 2	ILF2_HUMAN	34	41.3344	1.41334	cancer
cancer / NAT	P68402	P68402	P68402	-1.39207	1.39207	4.9271e-10	72	P68402	PAFAH1B2	Platelet-activating factor acetylhydrolase IB subunit beta	PA1B2_HUMAN	12	-61.8982	0.381018	cancer
cancer / NAT	O95793;O95793-2	O95793;O95793-2	O95793	0.814205	0.814205	4.97816e-10	180	O95793;O95793-2	STAU1	Double-stranded RNA-binding protein Staufen homolog 1;Isoform Short of Double-stranded RNA-binding protein Staufen homolog 1	STAU1_HUMAN	42	75.8329	1.75833	cancer
cancer / NAT	Q14696	Q14696	Q14696	-0.637208	0.637208	4.98146e-10	60	Q14696	MESD	LRP chaperone MESD	MESD_HUMAN	15	-35.7044	0.642956	cancer
cancer / NAT	Q9ULJ6	Q9ULJ6	Q9ULJ6	1.35338	1.35338	5.06347e-10	51	Q9ULJ6	ZMIZ1	Zinc finger MIZ domain-containing protein 1	ZMIZ1_HUMAN	21	155.51	2.5551	cancer
cancer / NAT	Q96FC9-2;Q96FC9-3	Q96FC9-2;Q96FC9-3	Q96FC9	1.96998	1.96998	5.12364e-10	78	Q96FC9-2;Q96FC9-3	DDX11	Isoform 2 of ATP-dependent DNA helicase DDX11;Isoform 3 of ATP-dependent DNA helicase DDX11	DDX11_HUMAN	33	291.762	3.91762	cancer
cancer / NAT	P29992	P29992	P29992	-2.48281	2.48281	5.13726e-10	51	P29992	GNA11	Guanine nucleotide-binding protein subunit alpha-11	GNA11_HUMAN	15	-82.1105	0.178895	cancer
cancer / NAT	Q9NZC9	Q9NZC9	Q9NZC9	1.45651	1.45651	5.26474e-10	105	Q9NZC9	SMARCAL1	SWI/SNF-related matrix-associated actin-dependent regulator of chromatin subfamily A-like protein 1	SMAL1_HUMAN	42	174.444	2.74444	cancer
cancer / NAT	Q9UI08	Q9UI08	Q9UI08	1.6993	1.6993	5.28026e-10	123	Q9UI08	EVL	Ena/VASP-like protein	EVL_HUMAN	24	224.742	3.24742	cancer
cancer / NAT	Q9UIW2	Q9UIW2	Q9UIW2	-0.988291	0.988291	5.31793e-10	93	Q9UIW2	PLXNA1	Plexin-A1	PLXA1_HUMAN	52	-49.5925	0.504075	cancer
cancer / NAT	Q06033;Q06033-2	Q06033;Q06033-2	Q06033	-1.18882	1.18882	5.34475e-10	93	Q06033;Q06033-2	ITIH3	Inter-alpha-trypsin inhibitor heavy chain H3;Isoform 2 of Inter-alpha-trypsin inhibitor heavy chain H3	ITIH3_HUMAN	27	-56.1337	0.438663	cancer
cancer / NAT	Q92945	Q92945	Q92945	0.896594	0.896594	5.4232e-10	288	Q92945	KHSRP	Far upstream element-binding protein 2	FUBP2_HUMAN	49	86.1665	1.86167	cancer
cancer / NAT	O75110	O75110	O75110	-2.57883	2.57883	5.46127e-10	51	O75110	ATP9A	Probable phospholipid-transporting ATPase IIA	ATP9A_HUMAN	26	-83.2623	0.167377	cancer
cancer / NAT	O43929	O43929	O43929	1.36614	1.36614	5.49245e-10	84	O43929	ORC4	Origin recognition complex subunit 4	ORC4_HUMAN	25	157.78	2.5778	cancer
cancer / NAT	Q4G148;Q4G148-2	Q4G148;Q4G148-2	Q4G148	-0.931244	0.931244	5.54267e-10	42	Q4G148;Q4G148-2	GXYLT1	Glucoside xylosyltransferase 1;Isoform 2 of Glucoside xylosyltransferase 1	GXLT1_HUMAN	9	-47.5594	0.524406	cancer
cancer / NAT	Q8IX12;Q8IX12-2	Q8IX12;Q8IX12-2	Q8IX12	0.880334	0.880334	5.57818e-10	282	Q8IX12;Q8IX12-2	CCAR1	Cell division cycle and apoptosis regulator protein 1;Isoform 2 of Cell division cycle and apoptosis regulator protein 1	CCAR1_HUMAN	59	84.0801	1.8408	cancer
cancer / NAT	Q9UNS1	Q9UNS1	Q9UNS1	1.04802	1.04802	5.57864e-10	123	Q9UNS1	TIMELESS	Protein timeless homolog	TIM_HUMAN	52	106.768	2.06768	cancer
cancer / NAT	P78364	P78364	P78364	1.18206	1.18206	5.61291e-10	96	P78364	PHC1	Polyhomeotic-like protein 1	PHC1_HUMAN	29	126.9	2.269	cancer
cancer / NAT	P13995	P13995	P13995	-0.355939	0.355939	5.71145e-10	84	P13995	MTHFD2	Bifunctional methylenetetrahydrofolate dehydrogenase/cyclohydrolase, mitochondrial	MTDC_HUMAN	23	-21.8639	0.781361	cancer
cancer / NAT	P49406	P49406	P49406	0.76229	0.76229	5.74548e-10	66	P49406	MRPL19	39S ribosomal protein L19, mitochondrial	RM19_HUMAN	19	69.6181	1.69618	cancer
cancer / NAT	Q96RU2-2	Q96RU2-2	Q96RU2	1.09672	1.09672	5.74548e-10	141	Q96RU2-2	USP28	Isoform 2 of Ubiquitin carboxyl-terminal hydrolase 28	UBP28_HUMAN	48	113.868	2.13868	cancer
cancer / NAT	P07858	P07858	P07858	1.13214	1.13214	5.83845e-10	174	P07858	CTSB	Cathepsin B	CATB_HUMAN	27	119.183	2.19183	cancer
cancer / NAT	Q9H2Y7-2	Q9H2Y7-2	Q9H2Y7	1.45661	1.45661	5.83845e-10	87	Q9H2Y7-2	ZNF106	Isoform 2 of Zinc finger protein 106	ZN106_HUMAN	45	174.463	2.74463	cancer
cancer / NAT	P50747	P50747	P50747	0.503086	0.503086	5.83874e-10	84	P50747	HLCS	Biotin--protein ligase	BPL1_HUMAN	27	41.7242	1.41724	cancer
cancer / NAT	Q15942	Q15942	Q15942	-0.237645	0.237645	5.91182e-10	177	Q15942	ZYX	Zyxin	ZYX_HUMAN	33	-15.1872	0.848128	cancer
cancer / NAT	Q9Y4F1;Q9Y4F1-2	Q9Y4F1;Q9Y4F1-2	Q9Y4F1	-1.35332	1.35332	5.95599e-10	123	Q9Y4F1;Q9Y4F1-2	FARP1	FERM, ARHGEF and pleckstrin domain-containing protein 1;Isoform 2 of FERM, ARHGEF and pleckstrin domain-containing protein 1	FARP1_HUMAN	46	-60.8611	0.391389	cancer
cancer / NAT	Q9H857-2	Q9H857-2	Q9H857	-0.50266	0.50266	6.08634e-10	54	Q9H857-2	NT5DC2	Isoform 2 of 5'-nucleotidase domain-containing protein 2	NT5D2_HUMAN	21	-29.4196	0.705804	cancer
cancer / NAT	Q96ME1-4	Q96ME1-4	Q96ME1	0.998717	0.998717	6.11616e-10	111	Q96ME1-4	FBXL18	Isoform 4 of F-box/LRR-repeat protein 18	FXL18_HUMAN	34	99.8222	1.99822	cancer
cancer / NAT	Q6IA86;Q6IA86-3;Q6IA86-6	Q6IA86;Q6IA86-3;Q6IA86-6	Q6IA86	0.588851	0.588851	6.1597e-10	147	Q6IA86;Q6IA86-3;Q6IA86-6	ELP2	Elongator complex protein 2;Isoform 3 of Elongator complex protein 2;Isoform 6 of Elongator complex protein 2	ELP2_HUMAN	39	50.4049	1.50405	cancer
cancer / NAT	Q9Y2K7	Q9Y2K7	Q9Y2K7	1.22081	1.22081	6.34889e-10	108	Q9Y2K7	KDM2A	Lysine-specific demethylase 2A	KDM2A_HUMAN	45	133.078	2.33078	cancer
cancer / NAT	P23610	P23610	P23610	-0.39516	0.39516	6.4194e-10	33	P23610	F8A1	Factor VIII intron 22 protein	F8I2_HUMAN	8	-23.9595	0.760405	cancer
cancer / NAT	Q99996	Q99996	Q99996	0.386575	0.386575	6.42146e-10	450	Q99996	AKAP9	A-kinase anchor protein 9	AKAP9_HUMAN	164	30.7286	1.30729	cancer
cancer / NAT	P80108	P80108	P80108	-1.84728	1.84728	6.42762e-10	30	P80108	GPLD1	Phosphatidylinositol-glycan-specific phospholipase D	PHLD_HUMAN	25	-72.2084	0.277916	cancer
cancer / NAT	O60231	O60231	O60231	0.639396	0.639396	6.52632e-10	132	O60231	DHX16	Pre-mRNA-splicing factor ATP-dependent RNA helicase DHX16	DHX16_HUMAN	43	55.7677	1.55768	cancer
cancer / NAT	O60921	O60921	O60921	1.70794	1.70794	6.5329e-10	48	O60921	HUS1	Checkpoint protein HUS1	HUS1_HUMAN	13	226.694	3.26694	cancer
cancer / NAT	Q15437	Q15437	Q15437	1.26372	1.26372	6.61788e-10	165	Q15437	SEC23B	Protein transport protein Sec23B	SC23B_HUMAN	39	140.114	2.40114	cancer
cancer / NAT	Q13480-2	Q13480-2	Q13480	-1.54815	1.54815	6.65425e-10	57	Q13480-2	GAB1	Isoform 2 of GRB2-associated-binding protein 1	GAB1_HUMAN	25	-65.8053	0.341947	cancer
cancer / NAT	Q9ULX3	Q9ULX3	Q9ULX3	1.08274	1.08274	6.67776e-10	72	Q9ULX3	NOB1	RNA-binding protein NOB1	NOB1_HUMAN	20	111.806	2.11806	cancer
cancer / NAT	O75718	O75718	O75718	-0.953644	0.953644	6.72256e-10	81	O75718	CRTAP	Cartilage-associated protein	CRTAP_HUMAN	21	-48.3673	0.516327	cancer
cancer / NAT	P50895	P50895	P50895	-0.783673	0.783673	6.81544e-10	105	P50895	BCAM	Basal cell adhesion molecule	BCAM_HUMAN	30	-41.9114	0.580886	cancer
cancer / NAT	P42677	P42677	P42677	1.36206	1.36206	6.83258e-10	27	P42677	RPS27	40S ribosomal protein S27	RS27_HUMAN	3	157.052	2.57052	cancer
cancer / NAT	Q9NXF1;Q9NXF1-2	Q9NXF1;Q9NXF1-2	Q9NXF1	0.773433	0.773433	6.907e-10	177	Q9NXF1;Q9NXF1-2	TEX10	Testis-expressed protein 10;Isoform 2 of Testis-expressed protein 10	TEX10_HUMAN	42	70.9333	1.70933	cancer
cancer / NAT	Q8IZ73	Q8IZ73	Q8IZ73	1.94541	1.94541	6.95353e-10	111	Q8IZ73	RPUSD2	RNA pseudouridylate synthase domain-containing protein 2	RUSD2_HUMAN	28	285.146	3.85146	cancer
cancer / NAT	Q86U90	Q86U90	Q86U90	1.04344	1.04344	7.08154e-10	57	Q86U90	YRDC	YrdC domain-containing protein, mitochondrial	YRDC_HUMAN	15	106.113	2.06113	cancer
cancer / NAT	Q9UKA4	Q9UKA4	Q9UKA4	-1.3769	1.3769	7.08173e-10	105	Q9UKA4	AKAP11	A-kinase anchor protein 11	AKA11_HUMAN	67	-61.4955	0.385045	cancer
cancer / NAT	Q9Y221	Q9Y221	Q9Y221	1.7812	1.7812	7.08496e-10	72	Q9Y221	NIP7	60S ribosome subunit biogenesis protein NIP7 homolog	NIP7_HUMAN	12	243.713	3.43713	cancer
cancer / NAT	P51153	P51153	P51153	-1.61142	1.61142	7.11421e-10	24	P51153	RAB13	Ras-related protein Rab-13	RAB13_HUMAN	9	-67.2725	0.327275	cancer
cancer / NAT	Q99470	Q99470	Q99470	-2.42826	2.42826	7.31664e-10	51	Q99470	SDF2	Stromal cell-derived factor 2	SDF2_HUMAN	9	-81.421	0.18579	cancer
cancer / NAT	Q8IYQ7	Q8IYQ7	Q8IYQ7	0.624541	0.624541	7.36116e-10	90	Q8IYQ7	THNSL1	Threonine synthase-like 1	THNS1_HUMAN	30	54.172	1.54172	cancer
cancer / NAT	Q9Y3A5	Q9Y3A5	Q9Y3A5	0.754481	0.754481	7.37572e-10	135	Q9Y3A5	SBDS	Ribosome maturation protein SBDS	SBDS_HUMAN	28	68.7025	1.68702	cancer
cancer / NAT	Q7Z304	Q7Z304	Q7Z304	-2.58043	2.58043	7.4141e-10	72	Q7Z304	MAMDC2	MAM domain-containing protein 2	MAMC2_HUMAN	26	-83.2809	0.167191	cancer
cancer / NAT	P53367-2	P53367-2	P53367	-1.04623	1.04623	7.45824e-10	78	P53367-2	ARFIP1	Isoform A of Arfaptin-1	ARFP1_HUMAN	24	-51.5769	0.484231	cancer
cancer / NAT	Q13247;Q13247-3	Q13247;Q13247-3	Q13247	1.12241	1.12241	7.60032e-10	96	Q13247;Q13247-3	SRSF6	Serine/arginine-rich splicing factor 6;Isoform SRP55-3 of Serine/arginine-rich splicing factor 6	SRSF6_HUMAN	23	117.711	2.17711	cancer
cancer / NAT	O00214;O00214-2	O00214;O00214-2	O00214	-1.42642	1.42642	7.79267e-10	45	O00214;O00214-2	LGALS8	Galectin-8;Isoform 2 of Galectin-8	LEG8_HUMAN	14	-62.7946	0.372054	cancer
cancer / NAT	Q8IWA5	Q8IWA5	Q8IWA5	-1.94662	1.94662	8.09656e-10	66	Q8IWA5	SLC44A2	Choline transporter-like protein 2	CTL2_HUMAN	16	-74.0577	0.259423	cancer
cancer / NAT	Q13617;Q13617-2	Q13617;Q13617-2	Q13617	0.540726	0.540726	8.11101e-10	252	Q13617;Q13617-2	CUL2	Cullin-2;Isoform 2 of Cullin-2	CUL2_HUMAN	50	45.4705	1.4547	cancer
cancer / NAT	Q96PQ0	Q96PQ0	Q96PQ0	-3.31559	3.31559	8.19738e-10	54	Q96PQ0	SORCS2	VPS10 domain-containing receptor SorCS2	SORC2_HUMAN	33	-89.9559	0.100441	cancer
cancer / NAT	Q7L4I2-2	Q7L4I2-2	Q7L4I2	0.906948	0.906948	8.30125e-10	39	Q7L4I2-2	RSRC2	Isoform 2 of Arginine/serine-rich coiled-coil protein 2	RSRC2_HUMAN	11	87.5075	1.87508	cancer
cancer / NAT	Q03001	Q03001	Q03001	0.50854	0.50854	8.32628e-10	606	Q03001	DST	Dystonin	DYST_HUMAN	345	42.261	1.42261	cancer
cancer / NAT	Q12996	Q12996	Q12996	0.916768	0.916768	8.39097e-10	192	Q12996	CSTF3	Cleavage stimulation factor subunit 3	CSTF3_HUMAN	47	88.7881	1.88788	cancer
cancer / NAT	Q96SN8;Q96SN8-2	Q96SN8;Q96SN8-2	Q96SN8	0.86051	0.86051	8.39097e-10	108	Q96SN8;Q96SN8-2	CDK5RAP2	CDK5 regulatory subunit-associated protein 2;Isoform 2 of CDK5 regulatory subunit-associated protein 2	CK5P2_HUMAN	51	81.5681	1.81568	cancer
cancer / NAT	P78316	P78316	P78316	0.89203	0.89203	8.6006e-10	90	P78316	NOP14	Nucleolar protein 14	NOP14_HUMAN	41	85.5786	1.85579	cancer
cancer / NAT	P50336	P50336	P50336	0.64328	0.64328	8.66859e-10	90	P50336	PPOX	Protoporphyrinogen oxidase	PPOX_HUMAN	23	56.1876	1.56188	cancer
cancer / NAT	Q9NV70	Q9NV70	Q9NV70	-0.803234	0.803234	8.78635e-10	174	Q9NV70	EXOC1	Exocyst complex component 1	EXOC1_HUMAN	47	-42.6937	0.573063	cancer
cancer / NAT	Q56VL3	Q56VL3	Q56VL3	-1.69662	1.69662	8.78635e-10	27	Q56VL3	OCIAD2	OCIA domain-containing protein 2	OCAD2_HUMAN	9	-69.1491	0.308509	cancer
cancer / NAT	Q16774-2	Q16774-2	Q16774	-1.10093	1.10093	9.03279e-10	72	Q16774-2	GUK1	Isoform 2 of Guanylate kinase	KGUA_HUMAN	18	-53.3783	0.466217	cancer
cancer / NAT	P51788;P51788-3;P51788-4	P51788;P51788-3;P51788-4	P51788	-3.2794	3.2794	9.0488e-10	57	P51788;P51788-3;P51788-4	CLCN2	Chloride channel protein 2;Isoform 3 of Chloride channel protein 2;Isoform 4 of Chloride channel protein 2	CLCN2_HUMAN	18	-89.7008	0.102992	cancer
cancer / NAT	P19174-2	P19174-2	P19174	0.691108	0.691108	9.27459e-10	222	P19174-2	PLCG1	Isoform 2 of 1-phosphatidylinositol 4,5-bisphosphate phosphodiesterase gamma-1	PLCG1_HUMAN	69	61.4523	1.61452	cancer
cancer / NAT	Q86UX2	Q86UX2	Q86UX2	-2.13076	2.13076	9.36163e-10	84	Q86UX2	ITIH5	Inter-alpha-trypsin inhibitor heavy chain H5	ITIH5_HUMAN	32	-77.1662	0.228338	cancer
cancer / NAT	Q5VWQ8;Q5VWQ8-2	Q5VWQ8;Q5VWQ8-2	Q5VWQ8	-2.09332	2.09332	9.40847e-10	75	Q5VWQ8;Q5VWQ8-2	DAB2IP	Disabled homolog 2-interacting protein;Isoform 2 of Disabled homolog 2-interacting protein	DAB2P_HUMAN	42	-76.5659	0.234341	cancer
cancer / NAT	Q8IWT6	Q8IWT6	Q8IWT6	-0.949197	0.949197	9.53992e-10	54	Q8IWT6	LRRC8A	Volume-regulated anion channel subunit LRRC8A	LRC8A_HUMAN	31	-48.2079	0.517921	cancer
cancer / NAT	Q9BYP7;Q9BYP7-2;Q9BYP7-3;Q9BYP7-4	Q9BYP7;Q9BYP7-2;Q9BYP7-3;Q9BYP7-4	Q9BYP7	0.0568363	0.0568363	9.66459e-10	75	Q9BYP7;Q9BYP7-2;Q9BYP7-3;Q9BYP7-4	WNK3	Serine/threonine-protein kinase WNK3;Isoform 2 of Serine/threonine-protein kinase WNK3;Isoform 3 of Serine/threonine-protein kinase WNK3;Isoform 4 of Serine/threonine-protein kinase WNK3	WNK3_HUMAN	34	4.01822	1.04018	cancer
cancer / NAT	Q9Y6I3;Q9Y6I3-1;Q9Y6I3-3	Q9Y6I3;Q9Y6I3-1;Q9Y6I3-3	Q9Y6I3	-1.09334	1.09334	9.7315e-10	87	Q9Y6I3;Q9Y6I3-1;Q9Y6I3-3	EPN1	Epsin-1;Isoform 2 of Epsin-1;Isoform 3 of Epsin-1	EPN1_HUMAN	20	-53.1326	0.468674	cancer
cancer / NAT	Q86WG5	Q86WG5	Q86WG5	-0.335594	0.335594	9.76156e-10	78	Q86WG5	SBF2	Myotubularin-related protein 13	MTMRD_HUMAN	58	-20.7542	0.792458	cancer
cancer / NAT	P41222	P41222	P41222	-3.18306	3.18306	1.00395e-09	51	P41222	PTGDS	Prostaglandin-H2 D-isomerase	PTGDS_HUMAN	10	-88.9896	0.110104	cancer
cancer / NAT	Q9Y3X0	Q9Y3X0	Q9Y3X0	0.731383	0.731383	1.00473e-09	126	Q9Y3X0	CCDC9	Coiled-coil domain-containing protein 9	CCDC9_HUMAN	36	66.023	1.66023	cancer
cancer / NAT	Q9NY61	Q9NY61	Q9NY61	1.71202	1.71202	1.02176e-09	96	Q9NY61	AATF	Protein AATF	AATF_HUMAN	25	227.619	3.27619	cancer
cancer / NAT	Q9Y6P5-2	Q9Y6P5-2	Q9Y6P5	-2.05157	2.05157	1.02373e-09	57	Q9Y6P5-2	SESN1	Isoform T1 of Sestrin-1	SESN1_HUMAN	24	-75.8779	0.241221	cancer
cancer / NAT	P21397	P21397	P21397	-2.23945	2.23945	1.03449e-09	63	P21397	MAOA	Amine oxidase [flavin-containing] A	AOFA_HUMAN	16	-78.8233	0.211767	cancer
cancer / NAT	Q00587;Q00587-2	Q00587;Q00587-2	Q00587	-1.25791	1.25791	1.04845e-09	69	Q00587;Q00587-2	CDC42EP1	Cdc42 effector protein 1;Isoform 2 of Cdc42 effector protein 1	BORG5_HUMAN	17	-58.1852	0.418148	cancer
cancer / NAT	Q9NQ88	Q9NQ88	Q9NQ88	1.05868	1.05868	1.05337e-09	87	Q9NQ88	TIGAR	Fructose-2,6-bisphosphatase TIGAR	TIGAR_HUMAN	17	108.303	2.08303	cancer
cancer / NAT	Q9UL12	Q9UL12	Q9UL12	-1.36447	1.36447	1.07822e-09	90	Q9UL12	SARDH	Sarcosine dehydrogenase, mitochondrial	SARDH_HUMAN	40	-61.1622	0.388378	cancer
cancer / NAT	Q9NPJ6	Q9NPJ6	Q9NPJ6	1.30503	1.30503	1.08014e-09	45	Q9NPJ6	MED4	Mediator of RNA polymerase II transcription subunit 4	MED4_HUMAN	12	147.089	2.47089	cancer
cancer / NAT	Q9NZN8	Q9NZN8	Q9NZN8	0.82543	0.82543	1.08045e-09	78	Q9NZN8	CNOT2	CCR4-NOT transcription complex subunit 2	CNOT2_HUMAN	29	77.2064	1.77206	cancer
cancer / NAT	Q96BY7	Q96BY7	Q96BY7	-1.30775	1.30775	1.08904e-09	147	Q96BY7	ATG2B	Autophagy-related protein 2 homolog B	ATG2B_HUMAN	71	-59.605	0.40395	cancer
cancer / NAT	O60496	O60496	O60496	1.05678	1.05678	1.12683e-09	39	O60496	DOK2	Docking protein 2	DOK2_HUMAN	19	108.028	2.08028	cancer
cancer / NAT	P14868	P14868	P14868	0.747366	0.747366	1.14955e-09	192	P14868	DARS	Aspartate--tRNA ligase, cytoplasmic	SYDC_HUMAN	41	67.8725	1.67873	cancer
cancer / NAT	Q9Y4J8-14	Q9Y4J8-14	Q9Y4J8	-1.56946	1.56946	1.14955e-09	69	Q9Y4J8-14	DTNA	Isoform 14 of Dystrobrevin alpha	DTNA_HUMAN	32	-66.3066	0.336934	cancer
cancer / NAT	P0CG12	P0CG12	P0CG12	0.934355	0.934355	1.14955e-09	36	P0CG12	CHTF8	Chromosome transmission fidelity protein 8 homolog isoform 2	CTF8A_HUMAN	24	91.1036	1.91104	cancer
cancer / NAT	P08237-3	P08237-3	P08237	0.00525118	0.00525118	1.16981e-09	213	P08237-3	PFKM	Isoform 3 of ATP-dependent 6-phosphofructokinase, muscle type	PFKAM_HUMAN	42	0.364648	1.00365	cancer
cancer / NAT	Q96FV2	Q96FV2	Q96FV2	-1.3352	1.3352	1.19606e-09	69	Q96FV2	SCRN2	Secernin-2	SCRN2_HUMAN	15	-60.3664	0.396336	cancer
cancer / NAT	P52434	P52434	P52434	1.25409	1.25409	1.2242e-09	39	P52434	POLR2H	DNA-directed RNA polymerases I, II, and III subunit RPABC3	RPAB3_HUMAN	8	138.517	2.38517	cancer
cancer / NAT	Q9Y4W2	Q9Y4W2	Q9Y4W2	1.06408	1.06408	1.24037e-09	138	Q9Y4W2	LAS1L	Ribosomal biogenesis protein LAS1L	LAS1L_HUMAN	43	109.084	2.09084	cancer
cancer / NAT	Q8IY95;Q8IY95-2	Q8IY95;Q8IY95-2	Q8IY95	-1.45903	1.45903	1.24438e-09	24	Q8IY95;Q8IY95-2	TMEM192	Transmembrane protein 192;Isoform 2 of Transmembrane protein 192	TM192_HUMAN	8	-63.6263	0.363737	cancer
cancer / NAT	P27918	P27918	P27918	-1.44879	1.44879	1.24673e-09	36	P27918	CFP	Properdin	PROP_HUMAN	11	-63.3672	0.366328	cancer
cancer / NAT	Q10567;Q10567-2	Q10567;Q10567-2	Q10567	-0.466042	0.466042	1.24866e-09	342	Q10567;Q10567-2	AP1B1	AP-1 complex subunit beta-1;Isoform B of AP-1 complex subunit beta-1	AP1B1_HUMAN	74	-27.6052	0.723948	cancer
cancer / NAT	Q96SZ6;Q96SZ6-3	Q96SZ6;Q96SZ6-3	Q96SZ6	1.25885	1.25885	1.24866e-09	57	Q96SZ6;Q96SZ6-3	CDK5RAP1	CDK5 regulatory subunit-associated protein 1;Isoform 3 of CDK5 regulatory subunit-associated protein 1	CK5P1_HUMAN	22	139.305	2.39305	cancer
cancer / NAT	P36269;P36269-3	P36269;P36269-3	P36269	-0.569753	0.569753	1.25806e-09	99	P36269;P36269-3	GGT5	Glutathione hydrolase 5 proenzyme;Isoform 3 of Glutathione hydrolase 5 proenzyme	GGT5_HUMAN	20	-32.6268	0.673732	cancer
cancer / NAT	Q9P2N5	Q9P2N5	Q9P2N5	0.304222	0.304222	1.29541e-09	183	Q9P2N5	RBM27	RNA-binding protein 27	RBM27_HUMAN	47	23.4753	1.23475	cancer
cancer / NAT	Q93062-3	Q93062-3	Q93062	1.0421	1.0421	1.30656e-09	51	Q93062-3	RBPMS	Isoform C of RNA-binding protein with multiple splicing	RBPMS_HUMAN	12	105.922	2.05922	cancer
cancer / NAT	Q8N465	Q8N465	Q8N465	-1.833	1.833	1.31759e-09	18	Q8N465	D2HGDH	D-2-hydroxyglutarate dehydrogenase, mitochondrial	D2HDH_HUMAN	12	-71.932	0.28068	cancer
cancer / NAT	Q9BVN2;Q9BVN2-4	Q9BVN2;Q9BVN2-4	Q9BVN2	1.66945	1.66945	1.32683e-09	21	Q9BVN2;Q9BVN2-4	RUSC1	RUN and SH3 domain-containing protein 1;Isoform 4 of RUN and SH3 domain-containing protein 1	RUSC1_HUMAN	9	218.094	3.18094	cancer
cancer / NAT	Q8TEM1	Q8TEM1	Q8TEM1	-0.517808	0.517808	1.33373e-09	180	Q8TEM1	NUP210	Nuclear pore membrane glycoprotein 210	PO210_HUMAN	61	-30.1568	0.698432	cancer
cancer / NAT	Q04726-3	Q04726-3	Q04726	1.36503	1.36503	1.34049e-09	87	Q04726-3	TLE3	Isoform 3 of Transducin-like enhancer protein 3	TLE3_HUMAN	28	157.582	2.57582	cancer
cancer / NAT	Q8IWA4	Q8IWA4	Q8IWA4	-0.325818	0.325818	1.36418e-09	75	Q8IWA4	MFN1	Mitofusin-1	MFN1_HUMAN	34	-20.2154	0.797846	cancer
cancer / NAT	P48426;P48426-2	P48426;P48426-2	P48426	0.772788	0.772788	1.40558e-09	75	P48426;P48426-2	PIP4K2A	Phosphatidylinositol 5-phosphate 4-kinase type-2 alpha;Isoform 2 of Phosphatidylinositol 5-phosphate 4-kinase type-2 alpha	PI42A_HUMAN	16	70.8569	1.70857	cancer
cancer / NAT	Q9NY27	Q9NY27	Q9NY27	0.894406	0.894406	1.40558e-09	126	Q9NY27	PPP4R2	Serine/threonine-protein phosphatase 4 regulatory subunit 2	PP4R2_HUMAN	30	85.8844	1.85884	cancer
cancer / NAT	Q32P44	Q32P44	Q32P44	-0.963297	0.963297	1.40772e-09	114	Q32P44	EML3	Echinoderm microtubule-associated protein-like 3	EMAL3_HUMAN	36	-48.7117	0.512883	cancer
cancer / NAT	O14880	O14880	O14880	-0.957007	0.957007	1.41366e-09	51	O14880	MGST3	Microsomal glutathione S-transferase 3	MGST3_HUMAN	8	-48.4876	0.515124	cancer
cancer / NAT	Q8NEJ9;Q8NEJ9-2	Q8NEJ9;Q8NEJ9-2	Q8NEJ9	1.41235	1.41235	1.43012e-09	75	Q8NEJ9;Q8NEJ9-2	NGDN	Neuroguidin;Isoform 2 of Neuroguidin	NGDN_HUMAN	19	166.17	2.6617	cancer
cancer / NAT	Q6ZUM4	Q6ZUM4	Q6ZUM4	1.3229	1.3229	1.43745e-09	36	Q6ZUM4	ARHGAP27	Rho GTPase-activating protein 27	RHG27_HUMAN	25	150.169	2.50169	cancer
cancer / NAT	Q15738	Q15738	Q15738	-1.04923	1.04923	1.43929e-09	102	Q15738	NSDHL	Sterol-4-alpha-carboxylate 3-dehydrogenase, decarboxylating	NSDHL_HUMAN	25	-51.6773	0.483227	cancer
cancer / NAT	O75150	O75150	O75150	0.93211	0.93211	1.44465e-09	192	O75150	RNF40	E3 ubiquitin-protein ligase BRE1B	BRE1B_HUMAN	65	90.8065	1.90806	cancer
cancer / NAT	P19338	P19338	P19338	1.49743	1.49743	1.44663e-09	393	P19338	NCL	Nucleolin	NUCL_HUMAN	80	182.339	2.82339	cancer
cancer / NAT	Q12882	Q12882	Q12882	-0.454941	0.454941	1.4545e-09	231	Q12882	DPYD	Dihydropyrimidine dehydrogenase [NADP(+)]	DPYD_HUMAN	60	-27.046	0.72954	cancer
cancer / NAT	Q7Z5L7;Q7Z5L7-2;Q7Z5L7-3	Q7Z5L7;Q7Z5L7-2;Q7Z5L7-3	Q7Z5L7	-1.87698	1.87698	1.47461e-09	93	Q7Z5L7;Q7Z5L7-2;Q7Z5L7-3	PODN	Podocan;Isoform 2 of Podocan;Isoform 3 of Podocan	PODN_HUMAN	26	-72.7746	0.272254	cancer
cancer / NAT	Q9BQC3	Q9BQC3	Q9BQC3	1.65883	1.65883	1.48564e-09	63	Q9BQC3	DPH2	2-(3-amino-3-carboxypropyl)histidine synthase subunit 2	DPH2_HUMAN	21	215.761	3.15761	cancer
cancer / NAT	P04839	P04839	P04839	1.05428	1.05428	1.49073e-09	105	P04839	CYBB	Cytochrome b-245 heavy chain	CY24B_HUMAN	20	107.668	2.07668	cancer
cancer / NAT	Q9Y217	Q9Y217	Q9Y217	-0.980989	0.980989	1.49253e-09	93	Q9Y217	MTMR6	Myotubularin-related protein 6	MTMR6_HUMAN	36	-49.3368	0.506632	cancer
cancer / NAT	Q99873;Q99873-2;Q99873-3	Q99873;Q99873-2;Q99873-3	Q99873	0.336921	0.336921	1.51756e-09	147	Q99873;Q99873-2;Q99873-3	PRMT1	Protein arginine N-methyltransferase 1;Isoform 2 of Protein arginine N-methyltransferase 1;Isoform 3 of Protein arginine N-methyltransferase 1	ANM1_HUMAN	28	26.3058	1.26306	cancer
cancer / NAT	P42025	P42025	P42025	-0.249359	0.249359	1.5227e-09	120	P42025	ACTR1B	Beta-centractin	ACTY_HUMAN	21	-15.873	0.84127	cancer
cancer / NAT	Q15075	Q15075	Q15075	-0.837195	0.837195	1.5295e-09	363	Q15075	EEA1	Early endosome antigen 1	EEA1_HUMAN	109	-44.0269	0.559731	cancer
cancer / NAT	Q9BW85	Q9BW85	Q9BW85	1.23479	1.23479	1.53287e-09	72	Q9BW85	CCDC94	Coiled-coil domain-containing protein 94	CCD94_HUMAN	25	135.347	2.35347	cancer
cancer / NAT	Q08AD1;Q08AD1-3	Q08AD1;Q08AD1-3	Q08AD1	-0.573657	0.573657	1.54067e-09	39	Q08AD1;Q08AD1-3	CAMSAP2	Calmodulin-regulated spectrin-associated protein 2;Isoform 3 of Calmodulin-regulated spectrin-associated protein 2	CAMP2_HUMAN	42	-32.8088	0.671912	cancer
cancer / NAT	Q9H4A4	Q9H4A4	Q9H4A4	0.606126	0.606126	1.57479e-09	237	Q9H4A4	RNPEP	Aminopeptidase B	AMPB_HUMAN	46	52.2167	1.52217	cancer
cancer / NAT	Q9Y5K5;Q9Y5K5-2;Q9Y5K5-3;Q9Y5K5-4	Q9Y5K5;Q9Y5K5-2;Q9Y5K5-3;Q9Y5K5-4	Q9Y5K5	-0.622063	0.622063	1.57986e-09	72	Q9Y5K5;Q9Y5K5-2;Q9Y5K5-3;Q9Y5K5-4	UCHL5	Ubiquitin carboxyl-terminal hydrolase isozyme L5;Isoform 2 of Ubiquitin carboxyl-terminal hydrolase isozyme L5;Isoform 3 of Ubiquitin carboxyl-terminal hydrolase isozyme L5;Isoform 4 of Ubiquitin carboxyl-terminal hydrolase isozyme L5	UCHL5_HUMAN	18	-35.0259	0.649741	cancer
cancer / NAT	P08133	P08133	P08133	-0.221551	0.221551	1.59668e-09	534	P08133	ANXA6	Annexin A6	ANXA6_HUMAN	73	-14.2357	0.857643	cancer
cancer / NAT	P30566	P30566	P30566	0.909227	0.909227	1.61502e-09	180	P30566	ADSL	Adenylosuccinate lyase	PUR8_HUMAN	35	87.8038	1.87804	cancer
cancer / NAT	P09884	P09884	P09884	0.318993	0.318993	1.65894e-09	102	P09884	POLA1	DNA polymerase alpha catalytic subunit	DPOLA_HUMAN	58	24.746	1.24746	cancer
cancer / NAT	Q7L7V1	Q7L7V1	Q7L7V1	-1.95906	1.95906	1.66804e-09	63	Q7L7V1	DHX32	Putative pre-mRNA-splicing factor ATP-dependent RNA helicase DHX32	DHX32_HUMAN	35	-74.2804	0.257196	cancer
cancer / NAT	P62316-2	P62316-2	P62316	1.46997	1.46997	1.69472e-09	69	P62316-2	SNRPD2	Isoform 2 of Small nuclear ribonucleoprotein Sm D2	SMD2_HUMAN	10	177.016	2.77016	cancer
cancer / NAT	P25445;P25445-6	P25445;P25445-6	P25445	-1.19924	1.19924	1.70445e-09	24	P25445;P25445-6	FAS	Tumor necrosis factor receptor superfamily member 6;Isoform 6 of Tumor necrosis factor receptor superfamily member 6	TNR6_HUMAN	13	-56.4494	0.435506	cancer
cancer / NAT	Q14739	Q14739	Q14739	1.35589	1.35589	1.77065e-09	90	Q14739	LBR	Lamin-B receptor	LBR_HUMAN	20	155.954	2.55954	cancer
cancer / NAT	Q99986	Q99986	Q99986	1.17255	1.17255	1.77922e-09	90	Q99986	VRK1	Serine/threonine-protein kinase VRK1	VRK1_HUMAN	25	125.41	2.2541	cancer
cancer / NAT	O95104	O95104	O95104	1.23736	1.23736	1.78706e-09	102	O95104	SCAF4	Splicing factor, arginine/serine-rich 15	SFR15_HUMAN	28	135.767	2.35767	cancer
cancer / NAT	P10721;P10721-2	P10721;P10721-2	P10721	1.54553	1.54553	1.80877e-09	120	P10721;P10721-2	KIT	Mast/stem cell growth factor receptor Kit;Isoform 2 of Mast/stem cell growth factor receptor Kit	KIT_HUMAN	35	191.911	2.91911	cancer
cancer / NAT	P23141;P23141-2;P23141-3	P23141;P23141-2;P23141-3	P23141	-1.23153	1.23153	1.82288e-09	84	P23141;P23141-2;P23141-3	CES1	Liver carboxylesterase 1;Isoform 2 of Liver carboxylesterase 1;Isoform 3 of Liver carboxylesterase 1	EST1_HUMAN	29	-57.4134	0.425866	cancer
cancer / NAT	Q96PU4	Q96PU4	Q96PU4	1.13822	1.13822	1.85335e-09	108	Q96PU4	UHRF2	E3 ubiquitin-protein ligase UHRF2	UHRF2_HUMAN	36	120.109	2.20109	cancer
cancer / NAT	Q96GW9	Q96GW9	Q96GW9	0.885252	0.885252	1.87995e-09	42	Q96GW9	MARS2	Methionine--tRNA ligase, mitochondrial	SYMM_HUMAN	22	84.7087	1.84709	cancer
cancer / NAT	Q9NSK0;Q9NSK0-3	Q9NSK0;Q9NSK0-3	Q9NSK0	-0.463994	0.463994	1.88192e-09	123	Q9NSK0;Q9NSK0-3	KLC4	Kinesin light chain 4;Isoform 3 of Kinesin light chain 4	KLC4_HUMAN	34	-27.5023	0.724977	cancer
cancer / NAT	Q4ZG55	Q4ZG55	Q4ZG55	-2.63198	2.63198	1.89255e-09	24	Q4ZG55	GREB1	Protein GREB1	GREB1_HUMAN	37	-83.8677	0.161323	cancer
cancer / NAT	O00339-2	O00339-2	O00339	-1.22417	1.22417	1.90877e-09	105	O00339-2	MATN2	Isoform 2 of Matrilin-2	MATN2_HUMAN	37	-57.1955	0.428045	cancer
cancer / NAT	Q14938-3	Q14938-3	Q14938	-3.1621	3.1621	1.90985e-09	48	Q14938-3	NFIX	Isoform 3 of Nuclear factor 1 X-type	NFIX_HUMAN	19	-88.8285	0.111715	cancer
cancer / NAT	P32969	P32969	P32969	1.03139	1.03139	1.91083e-09	114	P32969	RPL9	60S ribosomal protein L9	RL9_HUMAN	17	104.4	2.044	cancer
cancer / NAT	Q96D96;Q96D96-4	Q96D96;Q96D96-4	Q96D96	1.20466	1.20466	1.93281e-09	42	Q96D96;Q96D96-4	HVCN1	Voltage-gated hydrogen channel 1;Isoform 4 of Voltage-gated hydrogen channel 1	HVCN1_HUMAN	9	130.482	2.30482	cancer
cancer / NAT	Q9UNA4	Q9UNA4	Q9UNA4	-1.18274	1.18274	1.93674e-09	21	Q9UNA4	POLI	DNA polymerase iota	POLI_HUMAN	25	-55.9486	0.440514	cancer
cancer / NAT	O43709	O43709	O43709	1.33779	1.33779	1.95867e-09	45	O43709	BUD23	Probable 18S rRNA (guanine-N(7))-methyltransferase	BUD23_HUMAN	12	152.763	2.52763	cancer
cancer / NAT	O75410-2	O75410-2	O75410	-1.38966	1.38966	1.99473e-09	153	O75410-2	TACC1	Isoform 2 of Transforming acidic coiled-coil-containing protein 1	TACC1_HUMAN	56	-61.8346	0.381654	cancer
cancer / NAT	Q13526	Q13526	Q13526	-0.392201	0.392201	2.00917e-09	72	Q13526	PIN1	Peptidyl-prolyl cis-trans isomerase NIMA-interacting 1	PIN1_HUMAN	11	-23.8034	0.761966	cancer
cancer / NAT	P29401;P29401-2	P29401;P29401-2	P29401	-0.280768	0.280768	2.01543e-09	390	P29401;P29401-2	TKT	Transketolase;Isoform 2 of Transketolase	TKT_HUMAN	55	-17.6848	0.823152	cancer
cancer / NAT	P03951;P03951-2	P03951;P03951-2	P03951	-1.71383	1.71383	2.0306e-09	60	P03951;P03951-2	F11	Coagulation factor XI;Isoform 2 of Coagulation factor XI	FA11_HUMAN	22	-69.515	0.30485	cancer
cancer / NAT	Q86UX7;Q86UX7-2	Q86UX7;Q86UX7-2	Q86UX7	1.1278	1.1278	2.05505e-09	195	Q86UX7;Q86UX7-2	FERMT3	Fermitin family homolog 3;Isoform 2 of Fermitin family homolog 3	URP2_HUMAN	45	118.525	2.18525	cancer
cancer / NAT	P54619	P54619	P54619	-0.685523	0.685523	2.0866e-09	96	P54619	PRKAG1	5'-AMP-activated protein kinase subunit gamma-1	AAKG1_HUMAN	20	-37.822	0.62178	cancer
cancer / NAT	P46952	P46952	P46952	-1.15891	1.15891	2.09196e-09	54	P46952	HAAO	3-hydroxyanthranilate 3,4-dioxygenase	3HAO_HUMAN	18	-55.215	0.44785	cancer
cancer / NAT	O00584	O00584	O00584	-0.406679	0.406679	2.10611e-09	66	O00584	RNASET2	Ribonuclease T2	RNT2_HUMAN	16	-24.5642	0.754358	cancer
cancer / NAT	Q96KN2	Q96KN2	Q96KN2	-1.70404	1.70404	2.12876e-09	51	Q96KN2	CNDP1	Beta-Ala-His dipeptidase	CNDP1_HUMAN	17	-69.3076	0.306924	cancer
cancer / NAT	Q6PD62	Q6PD62	Q6PD62	0.894672	0.894672	2.15688e-09	171	Q6PD62	CTR9	RNA polymerase-associated protein CTR9 homolog	CTR9_HUMAN	61	85.9187	1.85919	cancer
cancer / NAT	Q9Y2J8	Q9Y2J8	Q9Y2J8	2.38845	2.38845	2.23683e-09	72	Q9Y2J8	PADI2	Protein-arginine deiminase type-2	PADI2_HUMAN	31	423.593	5.23593	cancer
cancer / NAT	Q06330	Q06330	Q06330	0.684541	0.684541	2.31551e-09	69	Q06330	RBPJ	Recombining binding protein suppressor of hairless	SUH_HUMAN	24	60.7191	1.60719	cancer
cancer / NAT	O95759	O95759	O95759	-1.80997	1.80997	2.32935e-09	69	O95759	TBC1D8	TBC1 domain family member 8	TBCD8_HUMAN	40	-71.4803	0.285197	cancer
cancer / NAT	Q96IY1	Q96IY1	Q96IY1	1.00069	1.00069	2.36126e-09	45	Q96IY1	NSL1	Kinetochore-associated protein NSL1 homolog	NSL1_HUMAN	16	100.096	2.00096	cancer
cancer / NAT	O75843	O75843	O75843	0.93642	0.93642	2.38225e-09	99	O75843	AP1G2	AP-1 complex subunit gamma-like 2	AP1G2_HUMAN	27	91.3773	1.91377	cancer
cancer / NAT	Q9BXB5	Q9BXB5	Q9BXB5	-2.299	2.299	2.40187e-09	72	Q9BXB5	OSBPL10	Oxysterol-binding protein-related protein 10	OSB10_HUMAN	30	-79.6796	0.203204	cancer
cancer / NAT	Q6UN15	Q6UN15	Q6UN15	0.97364	0.97364	2.41058e-09	102	Q6UN15	FIP1L1	Pre-mRNA 3'-end-processing factor FIP1	FIP1_HUMAN	26	96.3789	1.96379	cancer
[truncated: 8,780 more rows]
